# Supplementary material for: Lack of a site-specific phosphorylation of Presenilin 1 disrupts microglial gene networks and progenitors during development
Source: PLoS One. 2020 Aug 21;15(8):e0237773. doi: 10.1371/journal.pone.0237773 (PMC7444478; doi:10.1371/journal.pone.0237773)
Supplement: S1 Table — (XLSX) [file pone.0237773.s002.xlsx]

## Sheet: S2 Adult_CPM_diff_
Row.names	gene	KI1	KI2	KI3	KI4	WT1	WT2	WT3	WT4	KI_mean	WT_mean	logFC.KI-WT	PValue.KI-WT	FDR.KI-WT
0610007P14Rik	58520	11.4818	13.2726	11.0626	12.7714	10.8037	12.5	11.4149	14.4909	12.1471	12.3024	-0.0178849	0.898426	0.92501
0610009B22Rik	66050	16.6393	15.0351	14.8518	16.2126	10.3857	11.005	10.6721	12.2687	15.6847	11.0829	0.500456	8.20436e-05	0.000294811
0610009L18Rik	66838	3.01163	3.59691	2.48256	2.73167	1.63985	2.40864	1.56368	1.81527	2.95569	1.85686	0.676425	0.00819778	0.0181489
0610009O20Rik	66839	35.7255	37.5157	36.498	37.4628	26.7843	27.824	32.5637	31.3917	36.8005	29.6409	0.312323	0.000840838	0.00237883
0610010F05Rik	71675	52.6659	52.4429	55.5745	61.019	57.2019	68.4802	65.3229	69.2619	55.4256	65.0667	-0.230951	0.0129918	0.0272861
0610010K14Rik	104457	2.44695	2.23008	2.61322	2.235	2.89386	3.52991	2.58008	2.72291	2.38131	2.93169	-0.298942	0.201719	0.286859
0610011F06Rik	68347	8.31963	6.69025	8.97205	7.30809	5.20894	5.89702	5.70745	6.29085	7.82251	5.77607	0.435184	0.0103485	0.0223207
0610012G03Rik	106264	18.785	19.9988	16.6811	16.8512	15.7555	24.2525	22.7125	26.1649	18.079	22.2214	-0.296422	0.0432023	0.0777081
0610030E20Rik	68364	22.2484	26.0056	24.3029	27.9198	20.3213	22.0931	25.1753	20.3435	25.1192	21.9833	0.194198	0.104105	0.164934
0610037L13Rik	74098	38.1724	39.7818	34.3638	31.9286	28.2955	30.7309	30.2182	33.5825	36.0617	30.7068	0.231856	0.0211162	0.0416774
0610040J01Rik	76261	10.9172	10.6828	8.62363	9.54309	9.19604	10.299	11.3758	10.0153	9.94167	10.2215	-0.0371011	0.79918	0.849525
1110001J03Rik	66117	2.59753	2.84156	2.39545	3.05095	2.8617	3.69602	1.25095	3.06718	2.72137	2.71896	0.00214711	0.99382	0.995661
1110002J07Rik	68488	1.20465	1.65458	2.22124	2.235	0.707388	0.830566	1.09458	0.594657	1.82887	0.806798	1.18644	0.000151768	0.000512046
1110002L01Rik	100043040	3.99041	4.35226	4.61669	4.68286	1.99355	1.99336	2.07188	1.3458	4.41055	1.85115	1.25666	1.90022e-08	1.40413e-07
1110004E09Rik	68001	4.70567	5.97087	4.48603	4.89571	4.18002	4.44353	5.00379	6.04047	5.01457	4.91695	0.0280931	0.885802	0.915532
1110004F10Rik	56372	58.275	55.6082	59.7992	62.0124	53.4721	63.2476	60.3973	69.1368	58.9237	61.5634	-0.0632605	0.485708	0.580925
1110007C09Rik	68480	74.0861	77.6213	83.7972	78.5088	85.4653	84.344	93.1565	93.549	78.5033	89.1287	-0.18356	0.0257069	0.0494314
1110008F13Rik	67388	26.6529	27.6242	30.052	30.2967	35.2408	36.5864	37.2939	40.8436	28.6565	37.4912	-0.388377	2.35433e-05	9.52087e-05
1110008L16Rik	66132	12.31	11.2583	11.7595	12.6295	8.29573	7.05981	7.97479	7.94963	11.9893	7.81999	0.614494	6.30272e-06	2.85745e-05
1110008P14Rik	73737	11.8206	11.8698	12.0208	10.9267	7.71696	7.26745	7.97479	8.98246	11.6595	7.98542	0.542979	7.44305e-05	0.000270054
1110012L19Rik	68618	9.71251	11.2943	9.79957	10.6429	6.8488	6.76911	9.03028	9.13895	10.3623	7.94678	0.382429	0.0143571	0.0297928
1110019D14Rik	76311	3.95276	4.06451	4.31181	4.25714	1.83278	2.90698	2.58008	3.41146	4.14656	2.68282	0.627561	0.00566406	0.0130999
1110032A03Rik	68721	14.2676	14.9991	12.6306	14.5807	12.7973	13.8289	15.2459	15.0542	14.1195	14.2316	-0.00997001	0.940484	0.955526
1110034G24Rik	73747	6.73852	5.82699	4.66024	5.25047	2.05785	2.53323	1.9937	2.53512	5.61906	2.27997	1.30114	1.37737e-09	1.23393e-08
1110037F02Rik	66185	108.306	109.31	107.621	113.275	99.195	106.977	106.291	112.265	109.628	106.182	0.0461905	0.550312	0.641016
1110038B12Rik	68763	19.6885	20.5024	16.8117	16.0707	23.3116	22.799	21.5789	23.0039	18.2683	22.6733	-0.311337	0.0059247	0.0136514
1110038F14Rik	117171	10.0513	12.1935	10.1916	10.0398	10.2893	9.96679	10.5158	12.2061	10.619	10.7445	-0.018004	0.896107	0.923239
1110046J04Rik	68808	6.92675	8.81242	5.00867	5.53428	4.34079	3.57143	3.24465	3.88092	6.57053	3.75945	0.803799	0.000188482	0.000622514
1110051M20Rik	228356	14.2676	14.3517	10.8884	11.5652	10.2571	8.18108	7.70115	6.88551	12.7682	8.25621	0.629023	9.78163e-05	0.000346136
1110054M08Rik	68841	1.39288	0.79132	0.82752	1.52548	1.22185	1.16279	1.05549	1.25191	1.1343	1.17301	-0.0452575	0.886885	0.91619
1110057K04Rik	68832	46.9061	46.3282	51.2627	51.6533	39.678	44.5599	40.2649	44.4115	49.0376	42.2286	0.215569	0.012442	0.0262883
1110058L19Rik	68002	8.1314	8.45273	8.75429	9.54309	6.20572	7.4751	5.16016	8.01223	8.72038	6.7133	0.375903	0.0240732	0.0467055
1110059E24Rik	66206	16.564	14.2078	15.7229	16.5319	13.9227	16.2791	14.5032	18.9977	15.7566	15.9257	-0.0162933	0.899191	0.925564
1110059G10Rik	66202	18.1074	19.6751	17.5957	18.9443	13.1831	13.7459	13.4086	16.2748	18.5806	14.1531	0.391828	0.0011738	0.00322055
1110065P20Rik	68920	3.46337	4.38823	3.91983	3.97333	4.59802	4.06977	3.44011	4.78856	3.93619	4.22411	-0.104694	0.62236	0.704746
1190002N15Rik	68861	70.1333	68.4132	58.5797	62.9347	54.2759	92.5666	85.6899	85.8498	65.0152	79.5956	-0.291093	0.0220157	0.0432105
1190007I07Rik	544717	2.93634	3.38109	3.78917	3.19286	1.67201	2.32559	1.56368	2.06565	3.32486	1.90673	0.801082	0.00084617	0.00239227
1200014J11Rik	66874	44.0451	40.4652	44.3376	44.1324	53.665	54.4851	60.3191	57.2123	43.2451	56.4204	-0.383758	4.38877e-06	2.06971e-05
1300002E11Rik	100043489	3.68925	3.52497	3.17942	3.40571	2.09001	3.11462	2.81463	2.72291	3.44984	2.68554	0.366457	0.108101	0.170389
1500002C15Rik	68946	4.14099	4.60404	4.22471	3.40571	3.44048	3.32226	3.20555	3.00459	4.09386	3.24322	0.335414	0.110381	0.173295
1500011B03Rik	66236	11.2183	11.3303	9.27693	10.7848	7.20249	7.30898	7.97479	8.54429	10.6526	7.75764	0.457844	0.00120423	0.00329346
1500011K16Rik	67885	14.9076	14.0279	11.9773	13.41	11.8327	11.7525	9.53848	11.0794	13.5807	11.0508	0.29773	0.0246447	0.0476419
1500012F01Rik	68949	25.6741	25.2143	19.9476	21.5695	24.9193	24.1695	22.1652	20.2497	23.1014	22.8759	0.0158376	0.883409	0.913979
1500015O10Rik	78896	1.2423	0.971165	2.3519	2.235	0.707388	0.49834	0.156368	0.406871	1.70009	0.442242	1.91546	7.4108e-06	3.30987e-05
1500017E21Rik	668215	2.10814	2.4459	2.48256	2.48333	0.932465	1.53655	1.13367	0.782444	2.37998	1.09628	1.13058	8.44309e-05	0.000302068
1600002H07Rik	72016	5.57151	6.0428	7.62189	7.34357	3.85848	4.23589	5.19925	4.81986	6.64494	4.52837	0.552363	0.00338128	0.00828549
1600002K03Rik	69770	6.475	6.978	4.66024	5.60524	5.30541	5.23257	4.61287	5.91528	5.92962	5.26653	0.171407	0.363919	0.463429
1600012H06Rik	67912	54.3599	53.1263	56.2713	63.1831	39.3565	46.5117	46.6369	44.9749	56.7352	44.37	0.355597	8.30327e-05	0.000297671
1600014C10Rik	72244	36.516	39.1703	31.0102	28.4519	21.0287	22.5083	24.6671	24.913	33.7871	23.2793	0.537732	2.97505e-06	1.44906e-05
1600020E01Rik	72012	6.8891	7.4456	6.05396	6.17286	4.53371	5.31562	4.02649	5.75879	6.64038	4.90865	0.435169	0.0242186	0.0469137
1700001K19Rik	66323	1.46817	1.54667	1.61149	1.91571	2.50801	1.57808	1.72005	2.03435	1.63551	1.96012	-0.266285	0.336151	0.434903
1700001L05Rik	69291	1.95756	2.19411	2.17768	1.59643	2.7974	2.53323	2.61917	3.12978	1.98145	2.76989	-0.487621	0.0492579	0.0869655
1700003F12Rik	75480	1.46817	2.80559	1.17595	0.815952	2.09001	1.95183	1.52459	2.56642	1.56641	2.03321	-0.37558	0.313148	0.411152
1700007L15Rik	100502742	1.76933	1.40279	1.35016	1.38357	1.25401	1.45349	1.09458	1.4084	1.47647	1.30262	0.180509	0.518193	0.611525
1700010I14Rik	66931	2.71047	3.63288	3.31008	2.87357	1.47908	2.07642	2.30644	2.56642	3.13175	2.10709	0.571064	0.0238411	0.0463137
1700017B05Rik	74211	122.874	124.021	110.409	95.4309	171.767	135.548	147.534	133.704	113.184	147.138	-0.378646	0.000370233	0.00114127
1700019L03Rik	227736	0.865844	1.0431	1.30661	1.17071	1.6077	1.57808	1.32913	1.59619	1.09657	1.52777	-0.482271	0.102142	0.162148
1700020I14Rik	66602	190.335	187.183	186.497	197.106	173.246	189.12	178.534	189.351	190.28	182.563	0.0598192	0.48387	0.579065
1700021F05Rik	67851	9.52428	10.2512	9.18982	9.40119	8.23142	10.3821	11.8449	11.4237	9.59162	10.4705	-0.124585	0.394832	0.493403
1700021K19Rik	100502698	83.9868	83.4842	80.9227	76.4157	50.8676	58.5549	55.589	58.1825	81.2024	55.7985	0.541574	3.51234e-10	3.4863e-09
1700022I11Rik	67317	1.84462	1.69055	1.30661	1.49	2.18647	2.15947	2.03279	1.87787	1.58294	2.06415	-0.377678	0.150306	0.224529
1700023H06Rik	69442	9.22312	8.77645	3.65851	4.29262	5.72341	5.39868	4.65196	4.41298	6.48767	5.04676	0.364275	0.167901	0.24639
1700025G04Rik	69399	13.7406	14.2078	19.9911	18.0574	13.6654	13.5798	11.884	15.555	16.4992	13.671	0.26836	0.0624234	0.106588
1700028K03Rik	76421	1.54346	1.87039	2.04702	2.19952	1.38262	1.70266	1.83733	1.47099	1.9151	1.5984	0.265059	0.33386	0.432247
1700028N14Rik	73280	2.63518	2.48187	1.7857	2.3769	2.7974	2.65781	1.83733	2.03435	2.31991	2.33172	-0.0044494	0.987424	0.990883
1700030J22Rik	69528	1.76933	1.43876	1.48082	2.09309	1.89708	1.24585	1.32913	1.75267	1.6955	1.55619	0.117346	0.679903	0.755198
1700030K09Rik	72254	9.44899	8.09304	8.71073	9.15285	4.24433	2.94851	5.27744	4.56947	8.8514	4.25994	1.05127	1.68271e-08	1.25774e-07
1700034J05Rik	73344	2.10814	1.72652	2.17768	2.73167	2.21862	2.65781	3.40101	2.66031	2.186	2.73444	-0.319237	0.253667	0.346186
1700037C18Rik	73261	5.308	4.89179	4.7909	5.78262	4.69448	4.77576	4.41741	3.53665	5.19333	4.35607	0.257509	0.16514	0.243237
1700037H04Rik	67326	18.4462	18.9197	23.2141	18.6959	15.9162	17.9818	19.9761	21.2825	19.819	18.7891	0.0753902	0.543097	0.634411
1700047A11Rik	76604	0.677617	1.07907	0.82752	1.59643	1.73631	0.789038	1.36822	0.876337	1.04516	1.19248	-0.187687	0.609514	0.693643
1700047K16Rik	73335	1.91991	1.5107	1.74215	2.16405	0.836004	1.16279	0.820935	0.84504	1.8342	0.916193	1.00644	0.000595825	0.00174622
1700049G17Rik	73430	17.6933	16.1501	15.026	17.0995	8.1028	10.4236	9.18665	9.07635	16.4922	9.19735	0.84593	4.40553e-11	5.04813e-10
1700052N19Rik	73419	16.8275	15.3228	16.8553	17.6671	11.8327	13.8289	13.995	14.1153	16.6682	13.443	0.311005	0.00964642	0.0209456
1700056N10Rik	73392	1.58111	1.83442	1.91636	1.66738	1.51124	1.74419	2.42371	1.31451	1.74982	1.74841	0.00720545	0.980096	0.985617
1700058P15Rik	73377	2.67282	3.34512	1.91636	2.02214	4.21217	4.02825	3.36192	3.84962	2.48911	3.86299	-0.630428	0.0098749	0.0214002
1700064H15Rik	73424	0.527035	1.07907	0.348429	0.603095	1.31831	1.45349	0.820935	1.09542	0.639408	1.17204	-0.856814	0.0291974	0.0552804
1700066M21Rik	73467	15.0581	13.5963	15.3744	16.7802	15.5625	15.1578	14.1513	17.4329	15.2023	15.5761	-0.0366682	0.764475	0.822356
1700067K01Rik	73453	2.52224	2.26605	2.52611	2.73167	1.86493	1.78572	1.05549	1.53359	2.51152	1.55993	0.682469	0.0094818	0.0206318
1700084C06Rik	76618	1.39288	1.83442	2.00347	1.59643	2.15432	2.24253	2.69736	2.03435	1.7068	2.28214	-0.418118	0.120801	0.186938
1700086O06Rik	73516	3.95276	3.05737	3.78917	2.83809	2.31509	2.99004	2.26734	2.94199	3.40935	2.62861	0.372746	0.116578	0.181311
1700094D03Rik	73545	7.22791	6.43846	6.31528	5.03762	3.18324	3.98672	2.81463	2.72291	6.25482	3.17688	0.980007	2.77681e-06	1.3646e-05
1700099I09Rik	76624	0.376454	0.719381	0.958181	1.20619	1.09324	2.28406	1.79824	1.15802	0.815051	1.58339	-0.944244	0.010591	0.0227957
1700109H08Rik	77036	1.58111	1.87039	2.26479	2.48333	3.56909	2.45017	2.69736	2.00306	2.04991	2.67992	-0.387601	0.146088	0.219381
1700112E06Rik	76633	10.1266	10.8627	8.75429	9.43666	9.54973	16.2791	15.2068	14.5535	9.79505	13.8973	-0.501311	0.00273796	0.00688315
1700113A16Rik	76642	1.05407	0.935196	1.2195	0.957857	1.31831	1.03821	1.40732	0.594657	1.04166	1.08962	-0.0625414	0.851707	0.889925
1700123O20Rik	58248	24.206	23.4518	21.1671	21.2148	23.1187	21.3456	19.1942	22.0649	22.5099	21.4309	0.0701061	0.521654	0.614844
1810008B01Rik	69062	1.20465	1.00713	1.30661	0.780476	1.02893	0.789038	1.09458	1.00153	1.07472	0.978518	0.125657	0.711756	0.781618
1810009A15Rik	66276	17.1663	17.1932	18.4668	18.0574	14.405	15.6146	17.0833	17.5267	17.7209	16.1574	0.132835	0.248652	0.340738
1810011H11Rik	69069	27.3682	25.4301	40.2871	39.4495	19.3245	34.9668	35.5738	33.6764	33.1337	30.8854	0.101792	0.55479	0.645134
1810011O10Rik	69068	5.87268	6.15071	11.5417	13.9776	16.5271	8.67942	8.56117	10.9229	9.38568	11.1727	-0.253881	0.307883	0.405485
1810013L24Rik	69053	84.0998	84.7072	70.3392	71.8038	94.4362	74.9171	68.5676	80.3414	77.7375	79.5656	-0.0339656	0.739794	0.803894
1810014B01Rik	66263	6.73852	6.36653	4.1376	5.39238	5.69125	6.72759	6.9584	8.63818	5.65876	7.00386	-0.305507	0.117591	0.182727
1810022K09Rik	69126	17.5427	18.0565	16.2891	18.2348	15.4982	21.5947	20.3279	22.0649	17.5308	19.8714	-0.179048	0.163361	0.24102
1810024B03Rik	329509	3.57631	2.62574	3.44074	3.68952	1.96139	2.7824	2.34553	2.40993	3.33308	2.37481	0.491709	0.0353979	0.0652644
1810026J23Rik	69773	23.5284	22.1569	21.6462	20.8955	32.1861	32.3921	31.7037	34.8344	22.0567	32.7791	-0.571934	7.0911e-09	5.67565e-08
1810030O07Rik	69155	54.0211	56.7232	53.8759	56.7619	47.7487	55.0665	48.9824	54.2077	55.3455	51.5013	0.104343	0.221264	0.310036
1810032O08Rik	66293	4.29157	3.09334	3.35363	3.22833	7.00957	5.60632	4.76924	5.25802	3.49172	5.66079	-0.698457	0.000765058	0.00218705
1810034E14Rik	66503	5.91032	5.43133	3.87628	4.93119	2.95817	2.82393	3.59648	3.69314	5.03728	3.26793	0.624247	0.00460509	0.0109193
1810037I17Rik	67704	30.0034	28.7033	24.782	25.6493	23.4724	28.3223	28.1072	30.5779	27.2845	27.62	-0.0167431	0.876884	0.908831
1810043G02Rik	67884	17.3545	17.8407	15.5922	12.8779	13.8584	14.9087	14.9723	15.7115	15.9163	14.8627	0.0986933	0.457716	0.553737
1810043H04Rik	208501	6.43736	7.87723	6.18462	6.91785	7.52403	7.22593	5.35562	8.70078	6.85427	7.20159	-0.0728318	0.699511	0.77168
1810055G02Rik	72056	7.15262	7.12188	7.66544	7.80476	11.7362	10.216	11.884	9.92139	7.43618	10.9394	-0.556797	0.000188503	0.000622514
1810058I24Rik	67705	42.5016	41.4723	44.9909	44.8064	38.5526	42.6496	42.8841	46.665	43.4428	42.6878	0.0249893	0.777875	0.832121
2010012O05Rik	66439	5.53387	5.39536	3.87628	4.71833	5.75556	7.43357	6.17656	6.22825	4.88096	6.39849	-0.385747	0.0499831	0.0881322
2010013B24Rik	72079	1.20465	1.36682	1.43727	1.17071	0.578772	0.49834	0.860027	0.688551	1.29487	0.656422	0.972421	0.00339507	0.00831421
2010107E04Rik	70257	52.7788	50.033	39.4596	44.7	53.2148	67.2759	51.2498	73.5184	46.7428	61.3147	-0.391099	0.000979454	0.00273395
2010111I01Rik	72061	88.9937	85.2467	127.656	121.754	144.789	139.203	128.73	134.486	105.913	136.802	-0.369581	0.0012109	0.00330728
2010315B03Rik	630836	17.9945	16.294	15.6358	17.0995	8.68157	11.2957	11.1803	10.3909	16.7559	10.3871	0.692908	1.17335e-07	7.47327e-07
2210013O21Rik	70123	16.7145	15.5386	15.418	15.3257	12.5079	15.9469	11.8449	15.9306	15.7492	14.0576	0.163993	0.218468	0.306957
2210015D19Rik	76508	10.9172	11.2224	7.22991	7.52095	11.5433	13.4967	11.884	12.9573	9.22259	12.4703	-0.432664	0.00647556	0.0147934
2210016F16Rik	70153	24.3189	27.5883	30.0956	30.5805	20.2892	20.1828	21.3052	25.4138	28.1458	21.7977	0.36696	0.000735603	0.00211167
2210016L21Rik	72357	18.5592	20.934	20.6444	20.2214	14.9194	17.1927	18.4515	17.558	20.0898	17.0304	0.23928	0.0336559	0.0624828
2210018M11Rik	233545	27.4058	28.4156	32.3604	31.9286	27.9097	29.1113	31.9383	29.1695	30.0276	29.5322	0.0240573	0.813063	0.860422
2210404O09Rik	70081	5.75974	5.21552	7.31702	8.195	2.18647	3.57143	3.16646	3.88092	6.62182	3.20132	1.04868	3.77429e-06	1.80061e-05
2210408F21Rik	73652	4.96919	6.18668	5.57487	5.74714	3.50478	2.86545	3.12737	2.44123	5.61947	2.98471	0.912641	4.57748e-06	2.14965e-05
2210408I21Rik	72371	4.93154	5.25148	4.66024	5.71166	4.53371	5.19104	3.67466	4.81986	5.13873	4.55482	0.175136	0.382131	0.481642
2300009A05Rik	69478	7.7173	8.38079	4.57313	4.47	3.44048	3.19768	2.58008	3.31756	6.28531	3.13395	1.00241	4.75393e-05	0.000180256
2310001H17Rik	76432	5.49622	5.35939	3.31008	3.1219	1.76847	3.11462	2.971	2.87939	4.3219	2.68337	0.692494	0.00803057	0.0178235
2310003H01Rik	71885	27.067	27.0487	26.9162	26.6071	31.8646	26.3705	25.7617	27.2604	26.9098	27.8143	-0.0489953	0.629776	0.710922
2310009B15Rik	69549	3.16221	3.66885	2.83099	2.69619	3.2154	3.07309	3.16646	3.53665	3.08956	3.2479	-0.0725716	0.735498	0.800553
2310010J17Rik	78329	1.80698	1.65458	1.2195	1.06429	2.31509	1.6196	1.75915	1.81527	1.43634	1.87728	-0.387475	0.196916	0.281361
2310011J03Rik	66374	30.9068	30.8255	33.3186	29.2678	32.8614	36.1712	36.3557	36.055	31.0797	35.3608	-0.186458	0.0373483	0.0684608
2310015A10Rik	69548	7.79259	7.80529	9.27693	8.83357	4.88741	5.56479	5.23834	4.66337	8.42709	5.08848	0.729177	1.19654e-05	5.13194e-05
2310022A10Rik	66367	17.7686	18.1284	24.6949	22.279	15.3053	14.7426	15.8714	13.9588	20.7177	14.9695	0.467931	0.000311386	0.000975994
2310022B05Rik	69551	18.258	19.747	17.2037	16.2836	24.9836	22.01	18.9206	19.7176	17.8731	21.408	-0.260571	0.0380752	0.0695757
2310033P09Rik	67862	7.15262	6.40249	8.05743	8.51428	8.26357	7.22593	7.66206	6.76032	7.53171	7.47797	0.00955717	0.954084	0.966163
2310035C23Rik	227446	67.7993	68.8448	67.2033	74.429	72.2821	71.927	66.9257	70.8894	69.5691	70.5061	-0.0191571	0.80841	0.85675
2310036O22Rik	68544	44.3462	50.3927	52.787	48.7443	61.9286	59.3855	53.6735	66.9459	49.0676	60.4834	-0.302649	0.00338691	0.00829753
2310039H08Rik	67101	4.70567	6.76219	4.05049	4.00881	4.53371	5.52327	4.57378	5.94657	4.88179	5.14433	-0.0737839	0.728406	0.795057
2310045N01Rik	72368	16.3757	15.9703	18.1619	17.4188	14.5336	15.6562	18.4906	14.5848	16.9817	15.8163	0.103626	0.413204	0.511636
2310047M10Rik	71923	13.4394	15.6106	11.4546	8.86904	12.733	12.2924	11.7276	13.7084	12.3434	12.6154	-0.0320395	0.844998	0.884341
2310057M21Rik	68277	5.00683	5.03567	5.22644	4.29262	7.78126	7.89038	7.38841	8.20001	4.89039	7.81502	-0.677756	0.000122649	0.000423903
2310058D17Rik	75694	3.72689	3.16528	4.61669	3.76047	1.92924	2.36711	2.34553	1.94046	3.81733	2.14559	0.831926	0.000413085	0.00126012
2310061I04Rik	69662	10.4278	8.77645	8.9285	7.69833	8.32788	7.68274	6.64566	7.98093	8.95776	7.6593	0.223534	0.165428	0.243487
2310067B10Rik	71947	40.017	42.1558	50.0432	43.9195	35.3051	38.4967	41.6331	34.7718	44.0339	37.5517	0.230011	0.0212221	0.0418396
2410002F23Rik	668661	25.9377	27.0128	32.2297	32.3543	33.7295	28.5715	27.8336	26.9787	29.3836	29.2783	0.00424224	0.970754	0.97902
2410003L11Rik	69729	1.39288	1.18698	1.1324	1.09976	0.353694	0.166113	0.312737	0.219084	1.203	0.262907	2.16307	1.00623e-07	6.46908e-07
2410004B18Rik	66421	16.4887	13.992	17.3779	16.39	21.3181	19.3937	18.9206	23.7237	16.0621	20.839	-0.378401	0.00148083	0.00396006
2410004N09Rik	69749	6.73852	7.48157	5.53132	5.56976	5.72341	5.14951	5.31653	4.35039	6.33029	5.13496	0.303802	0.106907	0.16894
2410006H16Rik	69221	41.3346	41.7601	23.6061	21.3921	28.4241	24.3771	24.7062	24.1306	32.0232	25.4095	0.333954	0.05598	0.0971077
2410015M20Rik	224904	32.375	34.2066	20.4267	20.0086	27.2666	30.025	29.28	32.4871	26.7542	29.7647	-0.153071	0.310413	0.408076
2410016O06Rik	71952	11.0677	11.582	16.8117	16.0707	17.6847	14.8671	17.9433	17.9336	13.8831	17.1072	-0.30356	0.0392971	0.0716067
2410089E03Rik	73692	33.3538	31.437	36.4544	39.8752	34.8549	35.2575	33.1501	31.423	35.2801	33.6714	0.0676177	0.526572	0.619277
2410127L17Rik	67383	6.73852	6.43846	6.88148	5.92452	7.07388	9.6761	9.77303	8.51299	6.49575	8.759	-0.429306	0.0118514	0.0251873
2410131K14Rik	76792	22.399	22.8763	22.735	20.9309	22.6686	24.2941	22.7907	24.0054	22.2353	23.4397	-0.0762302	0.449884	0.546901
2500002B13Rik	78353	1.84462	1.94233	2.43901	2.30595	1.02893	1.45349	1.21186	1.72138	2.13298	1.35391	0.650826	0.0166367	0.0338115
2500004C02Rik	72326	2.71047	1.87039	2.43901	1.59643	1.35047	1.53655	1.44641	1.18931	2.15407	1.38068	0.641166	0.0230449	0.0449999
2510002D24Rik	72307	5.00683	6.47443	6.01041	6.03095	3.44048	3.61296	2.07188	4.1626	5.88066	3.32198	0.818706	0.000218213	0.00070922
2510003E04Rik	72320	47.8849	48.4503	49.3899	51.6178	36.5269	35.1745	36.0429	39.7482	49.3357	36.8731	0.419135	4.33378e-07	2.49106e-06
2510009E07Rik	72190	65.5782	65.176	136.628	141.089	121.896	135.839	135.923	131.169	102.118	131.207	-0.361728	0.0580815	0.100259
2510039O18Rik	77034	82.8575	87.0452	92.7257	88.2293	95.8189	100.872	99.0594	110.669	87.7144	101.605	-0.212468	0.0089295	0.0195579
2610001J05Rik	66520	25.4859	27.5523	32.3168	33.6314	31.6074	39.7426	32.7201	42.5337	29.7466	36.6509	-0.301484	0.00850802	0.0187414
2610002J02Rik	67513	13.59	14.9272	16.9424	16.7093	8.77804	10.1329	8.79573	8.85727	15.5422	9.14098	0.766655	2.17259e-09	1.88465e-08
2610002M06Rik	67028	24.6954	23.9194	22.4737	22.2436	15.4982	19.4768	16.6923	17.3703	23.333	17.2594	0.436693	0.000112885	0.000393356
2610005L07Rik	381598	6.58794	6.978	6.4895	6.20833	7.42757	6.97676	7.15386	5.94657	6.56594	6.87619	-0.0654879	0.707369	0.778327
2610008E11Rik	72128	20.8179	19.5672	19.2072	23.1305	15.659	16.3206	15.3241	15.3046	20.6807	15.6521	0.403095	0.000515341	0.00153605
2610015P09Rik	212153	9.11018	9.13614	9.4947	9.22381	4.08356	3.61296	4.33923	3.34886	9.24121	3.84615	1.26477	6.35974e-14	1.05436e-12
2610020C07Rik	69918	3.68925	3.20125	3.35363	3.8669	5.30541	3.94519	4.88652	4.1939	3.52776	4.58275	-0.377616	0.0858154	0.13972
2610020H08Rik	434234	11.143	10.0713	12.7612	13.339	9.26035	8.38872	7.11477	8.54429	11.8287	8.32703	0.503837	0.00120906	0.00330372
2610021A01Rik	668572	19.0862	16.9774	20.9493	25.0817	12.3471	14.9502	16.145	15.0229	20.5236	14.6163	0.490951	0.00023385	0.000753285
2610034B18Rik	70420	4.55509	5.25148	5.83619	6.88238	2.76524	1.6196	1.4855	1.56489	5.63129	1.85881	1.58986	4.07303e-10	3.99934e-09
2610035D17Rik	72386	4.59274	5.75505	3.09231	2.34143	1.47908	0.581396	0.625474	1.00153	3.94538	0.92187	2.07631	4.61272e-09	3.80827e-08
2610037D02Rik	70040	6.1362	6.94203	8.01387	10.0398	9.87127	10.3821	10.8285	7.69925	7.78296	9.69528	-0.314238	0.0738188	0.122779
2610044O15Rik8	72139	3.35044	2.84156	3.5714	3.26381	3.18324	3.11462	3.83103	4.00611	3.2568	3.53375	-0.120845	0.578604	0.667391
2610203C20Rik	100042464	7.00204	7.33769	7.97032	8.76262	4.34079	0.872095	1.0164	0.813742	7.76817	1.76075	2.12921	1.68676e-07	1.04462e-06
2610203C22Rik	72481	10.1266	9.20808	20.4267	19.6538	8.81019	13.1645	11.7276	14.3031	14.8538	12.0013	0.306783	0.16503	0.243105
2610301B20Rik	67157	13.0629	12.9129	11.8466	10.359	9.54973	11.005	10.0858	14.0527	12.0454	11.1733	0.106687	0.475197	0.570737
2610507B11Rik	72503	498.651	503.207	621.859	619.343	445.686	503.199	528.565	524.144	560.765	500.398	0.16431	0.118405	0.183785
2610507I01Rik	72203	5.38329	5.21552	4.05049	4.54095	1.76847	2.07642	1.32913	1.97176	4.79756	1.78644	1.42302	1.99209e-10	2.06033e-09
2610524H06Rik	330173	9.03489	9.06421	8.05743	8.97547	5.75556	6.51994	6.29383	10.5786	8.783	7.287	0.266659	0.161388	0.238592
2700029M09Rik	72612	17.1663	17.0853	21.08	21.6759	26.527	31.2708	32.4465	31.1413	19.2519	30.3464	-0.656344	1.49972e-08	1.13474e-07
2700038G22Rik	67194	1.31759	1.07907	0.914627	1.77381	2.05785	1.9103	1.72005	1.53359	1.27127	1.80545	-0.496705	0.0923899	0.148863
2700046G09Rik	67188	1.46817	2.15814	2.13413	1.77381	1.86493	2.24253	2.5019	1.84657	1.88356	2.11398	-0.162625	0.529743	0.622176
2700049A03Rik	76967	19.5379	19.3873	26.0451	24.3721	11.704	11.3372	11.6104	11.5176	22.3356	11.5423	0.950819	1.06034e-13	1.70735e-12
2700060E02Rik	68045	124.305	119.705	89.6334	103.236	91.6388	104.568	120.99	118.118	109.22	108.829	0.00556629	0.960408	0.970652
2700062C07Rik	68046	9.52428	8.45273	9.71247	10.6074	6.62372	7.76579	6.9584	8.23131	9.57421	7.39481	0.37225	0.0138715	0.0288972
2700081O15Rik	108899	13.8159	14.9991	15.1131	16.39	32.7328	26.5781	22.4389	28.481	15.0795	27.5577	-0.870758	5.72402e-11	6.4746e-10
2700089E24Rik	381820	73.4838	72.7654	56.5762	61.9414	64.5009	77.741	83.2271	87.2582	66.1917	78.1818	-0.23963	0.0281801	0.0535847
2700094K13Rik	72657	7.94317	6.18668	6.27173	7.73381	11.4147	11.2126	12.0404	13.5519	7.03385	12.0549	-0.776536	4.68457e-07	2.67522e-06
2700097O09Rik	72658	6.77617	7.4456	7.05569	8.3369	5.69125	6.3123	4.80833	5.13283	7.40359	5.48618	0.43445	0.0109888	0.0235185
2700099C18Rik	77022	1.31759	1.54667	2.65677	2.87357	3.60125	3.48838	3.9483	4.28779	2.09865	3.83143	-0.870553	0.00149032	0.00398215
2810001G20Rik	66456	2.25872	2.05024	1.74215	1.38357	1.63985	1.24585	1.29004	1.28321	1.85867	1.36474	0.440438	0.114205	0.178163
2810002D19Rik	66457	4.02805	5.17955	5.57487	5.56976	4.24433	4.60964	4.57378	3.69314	5.08806	4.28022	0.25121	0.234393	0.324921
2810004N23Rik	66523	14.757	14.9991	15.6793	17.6317	14.4693	15.8223	15.0114	17.7771	15.7668	15.77	-0.000633281	0.995858	0.997153
2810006K23Rik	72650	7.67966	7.66141	7.92677	9.01095	4.27648	4.1113	4.22195	4.41298	8.0697	4.25568	0.921625	1.11192e-08	8.58724e-08
2810008D09Rik	76972	11.1054	11.0785	9.71247	9.57857	6.52726	6.8937	5.19925	5.07024	10.3687	5.92261	0.809666	9.32431e-07	5.03537e-06
2810021J22Rik	69944	6.09855	6.25862	9.05916	8.47881	3.02247	3.52991	3.51829	3.03588	7.47378	3.27664	1.19029	2.05996e-09	1.80089e-08
2810025M15Rik	69953	28.5728	27.2286	30.7053	30.9352	30.6106	38.206	34.0492	42.3146	29.3605	36.2951	-0.306198	0.00627009	0.0143586
2810403A07Rik	74200	70.9992	71.0389	77.2642	78.4024	84.1148	78.9453	78.3406	78.1505	74.4262	79.8878	-0.102469	0.200563	0.285479
2810403D21Rik	69964	4.10335	3.27319	4.00694	3.65405	2.66878	2.57476	2.73645	2.7542	3.75938	2.68355	0.483631	0.0336131	0.0624221
2810408M09Rik	381406	9.07253	10.0713	9.71247	9.89785	13.7941	14.1196	11.7667	13.3641	9.68855	13.2611	-0.452759	0.000797329	0.00226929
2810417H13Rik	68026	8.5455	7.69738	19.5556	20.2214	22.5078	37.0017	29.9055	40.6245	14.005	32.5099	-1.21544	2.09183e-06	1.04976e-05
2810428I15Rik	66462	20.5544	20.5743	22.9963	19.6183	23.7296	27.0349	19.7806	29.0443	20.9358	24.8974	-0.251452	0.0522207	0.0913844
2810455O05Rik	72822	0.941134	0.755351	1.35016	1.41905	1.25401	0.789038	1.13367	0.657253	1.11642	0.958492	0.215936	0.55382	0.644249
2810474O19Rik	67246	153.631	152.725	114.764	130.02	191.316	242.899	244.326	239.334	137.785	229.469	-0.735505	5.00676e-11	5.71578e-10
2900005J15Rik	67261	1.46817	2.19411	2.17768	1.80929	0.578772	0.664453	0.664566	0.625955	1.91231	0.633436	1.58928	1.94536e-07	1.1916e-06
2900026A02Rik	243219	40.0547	40.5012	39.7645	37.6047	47.2985	53.4885	56.6445	51.0466	39.4813	52.1195	-0.39997	1.29541e-05	5.50808e-05
2900052L18Rik	76835	2.48459	3.27319	2.61322	2.12857	1.15754	1.24585	1.44641	1.31451	2.62489	1.29108	1.0229	0.000127058	0.000437547
2900076A07Rik	100504421	6.36207	5.50327	5.18289	6.24381	4.53371	4.36047	3.63557	3.41146	5.82301	3.9853	0.548753	0.00434616	0.0103631
2900089D17Rik	67277	5.15742	4.89179	3.48429	3.90238	4.8231	4.9834	5.12107	3.91222	4.35897	4.70995	-0.107186	0.61468	0.697911
3000002C10Rik	378954	1.35523	1.5107	1.7857	2.16405	0.450156	1.24585	0.664566	1.00153	1.70392	0.840525	1.02538	0.00279544	0.00700311
3010003L21Rik	109163	0.639971	0.971165	1.39372	0.957857	0.964619	1.16279	1.21186	1.15802	0.990678	1.12432	-0.187559	0.555701	0.646071
3010026O09Rik	68067	1.76933	2.23008	1.1324	1.95119	2.8617	2.94851	3.20555	1.72138	1.77075	2.68429	-0.588774	0.0518919	0.0909123
3110001I22Rik	66598	5.64681	5.61118	5.26999	4.96667	6.8488	8.67942	6.88021	7.63665	5.37366	7.51127	-0.481264	0.00524067	0.0122398
3110002H16Rik	76482	49.8425	49.4934	60.3654	57.7907	62.0572	60.0084	63.0947	59.1528	54.373	61.0783	-0.168261	0.0562886	0.0976018
3110007F17Rik	73061	2.25872	2.51784	2.13413	2.73167	1.47908	1.95183	1.68096	1.94046	2.41059	1.76308	0.454439	0.0788784	0.129931
3110009E18Rik	73103	1.05407	1.58264	1.04529	1.45452	0.675234	1.03821	0.586382	0.594657	1.28413	0.72362	0.839923	0.0128606	0.0270474
3110035E14Rik	76982	3.61396	3.99257	10.7578	12.0974	9.16388	5.48174	4.69105	4.78856	7.61541	6.03131	0.333905	0.293105	0.389478
3110040N11Rik	67290	7.22791	8.45273	7.18635	7.62738	6.10926	7.55815	7.85752	6.47864	7.62359	7.00089	0.127541	0.413825	0.51226
3110043O21Rik	73205	73.7096	71.3986	64.7207	70.8105	58.1022	69.726	65.5966	59.6848	70.1599	63.2774	0.150265	0.086506	0.140652
3110052M02Rik	73229	5.42093	5.86296	7.79611	6.88238	3.02247	3.44685	2.61917	3.75573	6.49059	3.21106	1.01049	8.89901e-07	4.83751e-06
3110053B16Rik	382686	2.48459	2.91349	3.22297	3.83143	2.66878	3.07309	2.4628	3.34886	3.11312	2.88838	0.107141	0.672279	0.74834
3110056K07Rik	73204	5.68445	5.71908	4.66024	6.35024	4.24433	4.81728	4.02649	4.00611	5.6035	4.27355	0.395127	0.033786	0.0626865
3110057O12Rik	269423	5.04448	5.14358	6.09751	6.38571	3.76202	4.6927	4.65196	4.06871	5.66782	4.29385	0.40288	0.0406637	0.0736828
3110062M04Rik	78412	8.65844	10.467	10.3658	10.6783	6.10926	7.26745	7.38841	7.48017	10.0424	7.06132	0.509007	0.00102695	0.00285101
3110082I17Rik	73212	11.143	10.7188	9.62536	8.97547	8.68157	8.84553	11.8449	11.7367	10.1157	10.2772	-0.0232017	0.878635	0.910109
3222401L13Rik	320513	4.14099	4.4242	5.48776	4.50547	1.54339	1.66113	1.25095	1.59619	4.63961	1.51291	1.61027	1.48854e-11	1.81723e-10
3300002I08Rik	69277	2.44695	2.30202	2.83099	3.26381	1.67201	2.15947	2.26734	2.37863	2.71094	2.11936	0.35588	0.14834	0.222078
3632451O06Rik	67419	0.903489	1.0431	1.65504	2.51881	1.67201	0.789038	0.625474	0.719849	1.53011	0.951592	0.673753	0.07743	0.12787
3830403N18Rik	70691	3.53866	3.77675	3.0052	3.97333	6.33433	2.4917	2.65826	3.03588	3.57349	3.63005	-0.0273404	0.919432	0.940037
3830406C13Rik	218734	24.1307	25.4301	25.3482	29.4807	18.3599	26.6612	22.7125	28.1993	26.0974	23.9832	0.122724	0.334778	0.433262
4632404H12Rik	74034	5.34564	4.06451	4.39892	3.58309	3.60125	3.69602	2.81463	3.28626	4.34804	3.34954	0.374515	0.0799047	0.131446
4632415L05Rik	70808	4.10335	4.06451	4.35537	4.75381	3.56909	3.48838	4.26104	3.94352	4.31926	3.81551	0.178821	0.389132	0.488318
4632427E13Rik	666737	43.2922	44.7455	52.4386	56.7264	47.2664	56.2293	52.8916	47.51	49.3007	50.9743	-0.0473967	0.64325	0.722557
4632428N05Rik	74048	699.3	697.512	549.299	526.537	522.277	414.12	445.533	419.39	618.162	450.33	0.456977	0.000123889	0.000427829
4731419I09Rik	100048897	4.78096	5.82699	4.44247	4.54095	8.29573	6.10466	6.4502	6.72902	4.89784	6.8949	-0.49388	0.00961298	0.0208878
4732440D04Rik	654788	1.80698	1.9783	1.74215	1.6319	1.89708	2.28406	2.42371	2.12825	1.78983	2.18328	-0.282126	0.261918	0.355164
4732491K20Rik	224523	2.33401	2.15814	2.70033	3.01548	1.41478	1.28738	1.68096	2.00306	2.55199	1.59654	0.669195	0.00956171	0.0207947
4833418N02Rik	74597	3.61396	3.92063	2.52611	2.51881	2.7974	3.73755	3.12737	2.47252	3.14488	3.03371	0.0584127	0.822602	0.867609
4833420G17Rik	67392	44.0827	44.6017	42.7261	45.1612	34.3083	33.2226	32.3683	34.271	44.1429	33.5426	0.395897	1.85169e-06	9.40859e-06
4833439L19Rik	97820	88.8054	87.4048	78.2659	77.9057	94.9186	95.3075	101.952	97.8681	83.0955	97.5116	-0.230537	0.00477982	0.0112771
4921507L20Rik	70852	1.43052	1.40279	1.35016	1.59643	1.02893	1.78572	1.95461	1.06412	1.44498	1.45834	0.000970846	0.997412	0.99806
4921514A10Rik	100038750	2.71047	1.54667	2.09058	1.56095	2.92601	3.15615	2.42371	2.56642	1.97717	2.76807	-0.486519	0.061552	0.105393
4921524J17Rik	66714	9.86309	9.24405	9.93024	10.9621	13.4404	12.5831	13.174	14.0527	9.99988	13.3125	-0.413502	0.00109926	0.00303126
4921531C22Rik	66730	2.18343	2.26605	2.30834	2.235	1.57555	2.74087	2.58008	2.09695	2.24821	2.24836	0.00750415	0.976626	0.983091
4930402H24Rik	228602	68.5899	70.4994	79.0935	76.8769	72.9895	70.349	65.2448	65.9131	73.7649	68.6241	0.103871	0.221531	0.310305
4930404I05Rik	67394	1.69404	2.94946	2.43901	2.62524	1.86493	2.11794	2.03279	1.65878	2.42694	1.91861	0.343674	0.189803	0.273003
4930404N11Rik	432479	11.1054	13.3805	11.803	9.72047	12.2828	11.3372	12.9004	9.98399	11.5023	11.6261	-0.0147311	0.917953	0.938999
4930405O22Rik	414079	1.05407	1.5107	1.17595	1.84476	1.41478	1.53655	1.29004	1.12672	1.39637	1.34202	0.0653651	0.833224	0.875962
4930412C18Rik	320152	2.0705	2.01427	2.17768	2.30595	0.225078	0.415283	0.74275	0.187787	2.1421	0.392724	2.47132	6.81521e-11	7.65965e-10
4930412M03Rik	100504140	2.78576	3.74078	2.48256	2.34143	5.33756	3.77908	4.33923	2.7542	2.83763	4.05252	-0.511781	0.0659148	0.111607
4930426L09Rik	74629	1.46817	1.76248	0.609751	0.851428	0.739542	1.12126	1.09458	0.876337	1.17296	0.957931	0.305905	0.396925	0.495472
4930427A07Rik	104732	2.59753	2.26605	4.26826	2.51881	5.01602	5.06645	5.08198	5.47711	2.91266	5.16039	-0.831966	0.000421797	0.00128384
4930430E12Rik	71639	27.3682	24.387	31.0973	30.6159	32.7649	32.2675	34.8311	35.4917	28.3671	33.8388	-0.255618	0.0080817	0.0179176
4930430F08Rik	68281	8.69608	8.27289	7.92677	9.33024	4.59802	4.02825	3.9483	5.07024	8.55649	4.4112	0.951264	9.97849e-09	7.75979e-08
4930432K21Rik	74666	2.55989	2.5538	1.48082	1.70286	0.546618	0.415283	0.820935	0.594657	2.07434	0.594373	1.79747	3.06829e-07	1.81708e-06
4930453N24Rik	67609	41.2593	42.0838	36.1495	37.1081	41.5108	41.6944	43.6268	48.1986	39.1502	43.7576	-0.160549	0.073139	0.121747
4930455G09Rik	78917	6.55029	6.11474	3.17942	4.00881	2.89386	3.86213	3.59648	3.88092	4.96332	3.55835	0.48368	0.044595	0.07982
4930469K13Rik	76874	1.84462	1.5107	2.17768	1.45452	2.47586	2.90698	3.12737	2.31603	1.74688	2.70656	-0.632113	0.0139975	0.0291105
4930473A02Rik	321014	3.42573	3.09334	6.53305	6.77595	5.40187	4.1113	6.05928	3.47405	4.95702	4.76163	0.0571565	0.833764	0.876245
4930481A15Rik	74931	4.70567	3.30915	1.95991	3.19286	1.73631	1.6196	1.68096	2.12825	3.2919	1.79128	0.87595	0.00195114	0.00506729
4930486L24Rik	214639	4.14099	3.9566	1.82925	1.70286	3.98709	5.68938	5.12107	5.28932	2.90742	5.02172	-0.782945	0.00392683	0.0094659
4930503L19Rik	269033	17.5804	18.8118	26.1322	26.7136	18.4564	22.1761	21.227	20.8756	22.3095	20.6838	0.109204	0.429988	0.52776
4930506C21Rik	75060	2.67282	2.30202	1.91636	1.88024	1.44693	1.32891	0.977303	0.657253	2.19286	1.1026	0.994444	0.00155196	0.00413162
4930506M07Rik	71653	85.2668	82.9087	103.353	111.608	34.6941	36.4619	46.5196	40.0298	95.7841	39.4264	1.28083	6.02277e-31	4.81743e-29
4930512H18Rik	75111	1.12936	1.07907	1.17595	0.745	0.257232	0.830566	0.430013	0.28168	1.03235	0.449873	1.22672	0.000890159	0.00250628
4930513N10Rik	319960	1.16701	0.935196	1.04529	1.17071	1.57555	1.24585	1.13367	1.25191	1.07955	1.30174	-0.272245	0.386078	0.485475
4930515G01Rik	67642	1.54346	1.00713	0.914627	0.993333	1.15754	1.24585	1.25095	1.4397	1.11464	1.27351	-0.190839	0.538321	0.629908
4930518I15Rik	74704	2.22108	2.51784	2.48256	2.98	1.6077	1.32891	1.83733	0.938933	2.55037	1.42822	0.841055	0.00188409	0.0049066
4930522L14Rik	100041734	7.26556	6.65428	7.22991	7.41452	4.4051	6.3123	6.37202	4.85115	7.14107	5.48514	0.384502	0.0583601	0.100669
4930523C07Rik	67647	1.9952	1.90636	1.43727	1.49	3.02247	2.4917	2.61917	2.69161	1.70721	2.70624	-0.662811	0.0182114	0.0365475
4930533B01Rik	75166	2.4093	2.01427	2.83099	3.29928	4.56587	7.4751	6.17656	4.53818	2.63846	5.68892	-1.10366	1.99909e-05	8.21099e-05
4930539J05Rik	319587	2.25872	2.94946	3.0052	2.62524	2.82955	2.99004	2.07188	3.03588	2.70966	2.73184	-0.0151356	0.95011	0.963248
4930556M19Rik	75259	3.08692	2.80559	3.22297	3.44119	2.37939	2.32559	2.38462	2.40993	3.13917	2.37488	0.400999	0.0744551	0.123704
4930565N06Rik	68306	4.59274	5.35939	5.13933	4.75381	4.37294	4.6927	4.14376	4.31909	4.96132	4.38212	0.179199	0.388178	0.487399
4930579G18Rik	75913	5.7221	5.9349	6.88148	7.13071	6.75234	6.76911	7.85752	5.6023	6.4173	6.74532	-0.0701165	0.698684	0.770975
4930579G24Rik	75939	3.80218	3.59691	4.1376	4.43452	2.8617	3.73755	3.12737	4.69466	3.9928	3.60532	0.145142	0.522828	0.61605
4930581F22Rik	78934	5.11977	4.78389	4.22471	3.33476	1.86493	1.57808	1.87642	1.53359	4.36578	1.71325	1.34691	2.71872e-08	1.95273e-07
4930589L23Rik	75879	2.78576	3.09334	3.0052	2.44786	0.932465	0.705981	1.13367	1.06412	2.83304	0.959061	1.55122	7.68284e-09	6.11352e-08
4930594C11Rik	77633	1.69404	1.43876	1.48082	1.84476	2.50801	1.66113	2.07188	1.03283	1.6146	1.81846	-0.168238	0.573238	0.662335
4930599N23Rik	75379	2.29637	2.58977	3.35363	3.65405	3.08678	2.15947	2.89282	2.37863	2.97345	2.62943	0.173902	0.462507	0.558764
4931406C07Rik	70984	15.5475	15.5027	13.2839	12.8779	14.1799	13.6213	14.2295	18.1214	14.303	15.038	-0.0732436	0.661053	0.738983
4931406P16Rik	233103	85.455	86.8293	77.6997	83.1207	124.629	123.381	113.836	129.98	83.2762	122.956	-0.562083	4.30937e-12	5.59946e-11
4931413K12Rik	70987	2.71047	3.09334	3.31008	1.95119	5.49833	3.69602	5.04288	3.25497	2.76627	4.37305	-0.662788	0.014539	0.0301197
4931414P19Rik	74359	4.70567	5.4673	5.9233	4.96667	1.73631	2.201	2.58008	2.12825	5.26573	2.16141	1.28645	8.07219e-09	6.39442e-08
4931422A03Rik	70986	1.61875	1.69055	2.96165	2.51881	1.96139	2.57476	1.75915	1.50229	2.19744	1.9494	0.173794	0.558622	0.648538
4931428F04Rik	74356	1.05407	1.65458	1.52438	1.20619	1.70416	1.86877	1.56368	1.59619	1.3598	1.6832	-0.30704	0.304036	0.401449
4931440P22Rik	71004	3.80218	4.02854	4.18115	3.61857	3.47263	4.44353	3.67466	4.85115	3.90761	4.11049	-0.0742806	0.729899	0.796077
4932427H20Rik	100038370	1.43052	1.5107	1.43727	1.38357	2.66878	2.69934	2.22825	1.75267	1.44052	2.33726	-0.693361	0.0121096	0.0256784
4932438A13Rik	229227	157.019	151.394	156.096	169.718	143.31	154.153	150.27	142.561	158.557	147.574	0.103769	0.2719	0.36608
4932442E05Rik	74415	4.63038	5.10761	5.53132	6.13738	6.30218	5.68938	5.942	5.44581	5.35167	5.84484	-0.127093	0.485561	0.580806
4933404O12Rik	66752	2.25872	1.76248	2.65677	2.34143	1.63985	0.955151	1.44641	1.28321	2.25485	1.33116	0.749304	0.00944964	0.0205728
4933406I18Rik	71045	2.18343	1.94233	1.61149	1.59643	1.09324	1.24585	1.0164	0.84504	1.83342	1.05013	0.809213	0.00472155	0.0111653
4933406P04Rik	74420	1.01643	1.15101	1.17595	1.20619	1.73631	1.12126	1.60278	1.3771	1.13739	1.45936	-0.36261	0.223851	0.312985
4933407K13Rik	74396	4.8939	4.85582	4.7038	5.46333	4.01925	3.48838	4.53469	2.8481	4.97921	3.7226	0.422624	0.0423478	0.0763413
4933421O10Rik	100504166	5.49622	4.56807	2.43901	2.98	3.18324	2.94851	3.01009	2.7542	3.87083	2.97401	0.382717	0.135949	0.206641
4933423P22Rik	71158	6.09855	7.66141	8.10098	9.64952	13.7297	17.608	18.3733	8.98246	7.87762	14.6734	-0.894282	2.11373e-05	8.64782e-05
4933424M12Rik	67548	1.27994	0.863258	1.7857	1.59643	0.385848	0.622925	0.54729	0.250382	1.38133	0.451611	1.62544	8.62075e-06	3.80747e-05
4933426M11Rik	217684	210.099	210.671	185.19	179.9	165.882	176.994	177.947	165.002	196.465	171.456	0.196648	0.0303148	0.0571237
4933427D14Rik	74477	19.0486	19.0636	19.904	21.0374	21.6396	20.3073	19.6242	21.4077	19.7634	20.7447	-0.0707503	0.517071	0.610318
4933430I17Rik	214106	1.50581	1.15101	0.871073	0.922381	2.41155	3.23921	4.18286	3.34886	1.11257	3.29562	-1.55685	1.00918e-07	6.48127e-07
4933431E20Rik	329735	3.50102	4.35226	3.48429	3.51214	3.02247	1.99336	1.87642	1.12672	3.71243	2.00474	0.887845	0.00179842	0.00470624
4933434E20Rik	99650	84.6644	78.0169	67.5953	69.3559	72.3465	76.7028	71.0304	83.8154	74.9081	75.9738	-0.0203582	0.826419	0.870816
4933439C10Rik	74476	11.1054	11.0785	13.5452	11.0331	7.84557	8.804	9.4212	8.66948	11.6905	8.68506	0.428201	0.00277022	0.00694839
4933439K11Rik	71319	1.88227	2.05024	1.74215	2.12857	0.418002	0.789038	0.508198	0.532062	1.95081	0.561825	1.80698	2.65238e-09	2.27046e-08
5031414D18Rik	271221	12.8371	11.582	21.5155	19.7602	12.4757	16.6944	16.3405	16.4626	16.4237	15.4933	0.0835461	0.63319	0.71386
5031425E22Rik	269630	14.9829	14.4596	18.249	17.3124	19.1316	18.2725	18.8424	14.6474	16.2509	17.7235	-0.125005	0.326746	0.425101
5031434O11Rik	100039684	2.0705	2.73365	1.95991	1.91571	1.22185	0.664453	0.860027	0.719849	2.16994	0.866545	1.31334	3.36204e-05	0.000132059
5031439G07Rik	223739	265.776	267.214	342.854	333.902	251.766	232.268	256.64	222.903	302.437	240.894	0.32817	0.00194075	0.00504349
5330426P16Rik	68190	5.87268	4.85582	4.39892	3.08643	6.20572	7.30898	6.13746	6.25955	4.55346	6.47793	-0.507679	0.015583	0.031944
5330438D12Rik	327824	2.89869	2.23008	1.95991	3.22833	1.92924	1.32891	1.83733	1.31451	2.57926	1.6025	0.687304	0.0124704	0.0263348
5330439K02Rik	78282	1.35523	1.18698	1.00173	0.922381	1.02893	0.955151	0.938211	0.938933	1.11658	0.965306	0.20907	0.487693	0.582748
5430403G16Rik	77200	4.4798	4.71195	4.7038	5.56976	1.96139	2.90698	2.30644	2.28474	4.86633	2.36489	1.04655	1.49635e-06	7.74131e-06
5430405H02Rik	74487	1.95756	2.37396	2.09058	1.98667	1.02893	1.16279	1.21186	0.938933	2.10219	1.08563	0.957292	0.000459755	0.00138365
5430416N02Rik	100503199	7.19027	5.75505	7.40412	7.27262	9.80696	7.97344	8.20935	7.44887	6.90551	8.35965	-0.277505	0.0859476	0.139837
5430427O19Rik	71398	28.1211	30.3219	37.0206	40.6202	23.5689	31.603	30.2573	28.5749	34.021	28.501	0.2565	0.0305767	0.0575305
5430435G22Rik	226421	325.52	332.031	452.348	447.958	427.423	462.002	498.933	481.391	389.464	467.437	-0.26332	0.0273972	0.0522493
5530601H04Rik	71445	10.5783	8.88436	12.8483	14.9709	9.51758	10.4236	11.1413	9.48322	11.8205	10.1414	0.221955	0.16463	0.242631
5730405O15Rik	70489	2.59753	2.84156	2.13413	2.3769	0.932465	1.07974	0.899119	1.22061	2.48753	1.03298	1.26345	2.08074e-06	1.04534e-05
5730409E04Rik	230757	16.9028	18.1284	17.2037	15.6095	11.3825	11.7525	11.9622	13.7397	16.9611	12.2092	0.47281	0.000230884	0.000744705
5730455P16Rik	70591	27.4058	27.0487	27.5695	26.5717	19.4532	19.5598	18.6469	21.3764	27.1489	19.7591	0.457031	4.32502e-06	2.04278e-05
5730480H06Rik	70592	1.20465	1.72652	2.26479	1.49	1.28616	1.86877	1.29004	1.31451	1.67149	1.43987	0.214992	0.467826	0.563808
5730508B09Rik	70617	8.31963	7.04994	11.3675	11.2814	9.7105	14.8256	18.0215	14.929	9.50462	14.3717	-0.596006	0.00116633	0.00320117
5830415F09Rik	74753	9.93838	9.31599	9.58181	10.8202	10.4822	10.8804	10.9067	10.4222	9.9141	10.6729	-0.10493	0.415372	0.513555
5830417I10Rik	100302730	23.3025	23.6317	27.0468	30.5095	15.241	16.6944	17.7478	14.7099	26.1226	16.0983	0.699926	1.51502e-08	1.14491e-07
5830428H23Rik	414758	24.5071	25.4301	23.4754	23.8755	11.3182	12.9984	12.9004	12.0496	24.322	12.3167	0.983587	1.11416e-17	2.80087e-16
5830432E09Rik	67765	10.2772	9.5318	10.54	11.0686	7.13818	3.98672	4.10467	4.47558	10.3544	4.92629	1.06395	6.09561e-10	5.78919e-09
5830444B04Rik	641454	2.29637	2.15814	2.61322	2.62524	0.707388	0.789038	0.469105	0.500764	2.42324	0.616574	1.97086	1.27161e-10	1.36087e-09
5830462I19Rik	100038626	1.43052	1.54667	1.48082	1.09976	2.18647	1.6196	1.44641	1.25191	1.38945	1.6261	-0.229188	0.474592	0.570177
5930403N24Rik	320504	4.14099	4.28032	3.09231	3.22833	3.53694	4.402	4.22195	3.75573	3.68549	3.97915	-0.105491	0.625031	0.706991
6030443J06Rik	320719	1.50581	1.61861	2.04702	1.70286	1.28616	1.03821	0.625474	0.970231	1.71858	0.980018	0.79662	0.0079282	0.0176249
6030458C11Rik	77877	26.9541	30.7176	28.4405	30.9707	21.1252	21.7608	22.3998	22.3466	29.2707	21.9081	0.418544	2.46355e-05	9.92347e-05
6230400D17Rik	76133	2.52224	2.76962	3.96338	2.62524	3.40832	3.8206	3.40101	3.34886	2.97012	3.4947	-0.238141	0.300945	0.398136
6330403L08Rik	70744	24.3566	21.1858	23.0399	22.8821	33.3437	33.3888	30.1791	32.3932	22.8661	32.3262	-0.499869	4.68706e-07	2.6754e-06
6330408A02Rik	321008	9.29841	10.8267	11.6288	12.665	7.94203	7.1844	7.77933	7.35497	11.1047	7.56518	0.552871	0.000137573	0.000469164
6330416G13Rik	230279	49.2401	47.0835	26.7855	23.2369	43.1185	60.839	56.3708	52.7993	36.5865	53.2819	-0.541527	0.00325293	0.00801072
6330418K02Rik	69004	1.43052	1.36682	2.74388	1.66738	1.09324	1.03821	1.25095	0.970231	1.80215	1.08816	0.719308	0.0185066	0.0370492
6330419J24Rik	320237	0.564681	0.575505	0.740412	0.638571	0.707388	1.95183	1.25095	2.15955	0.629792	1.51743	-1.26419	0.00125252	0.0034107
6330549D23Rik	229613	1.54346	1.87039	1.82925	1.98667	1.67201	1.12126	1.56368	1.4397	1.80744	1.44916	0.313179	0.244642	0.336141
6430531B16Rik	381933	1.12936	0.467598	1.00173	1.70286	0.578772	0.539868	0.390921	0.688551	1.07539	0.549528	0.95516	0.0168661	0.0342325
6430548M08Rik	234797	37.6454	36.2209	38.545	37.6047	48.7133	56.52	58.9509	53.394	37.504	54.3946	-0.535769	2.1225e-09	1.8477e-08
6430550D23Rik	320095	3.27515	3.59691	4.22471	2.73167	2.95817	2.82393	3.63557	2.44123	3.45711	2.96472	0.220985	0.366313	0.46566
6430562O15Rik	320893	1.12936	1.83442	1.65504	2.3769	1.92924	1.49502	1.44641	1.18931	1.74893	1.515	0.208706	0.48858	0.583454
6530402F18Rik	76220	8.39492	7.98513	5.40065	4.71833	8.81019	6.72759	6.88021	6.66642	6.62476	7.2711	-0.134402	0.508647	0.602396
6530409C15Rik	76224	2.63518	3.20125	2.83099	2.73167	2.57232	3.57143	3.12737	3.41146	2.84977	3.17064	-0.151029	0.512669	0.605936
6720427I07Rik	109186	19.6885	19.6391	23.911	26.2169	20.9965	20.8057	20.7579	18.0275	22.3639	20.1469	0.151102	0.204294	0.290052
6820431F20Rik	547150	11.7454	12.1216	10.6271	10.0043	13.1188	12.7907	13.0568	12.0496	11.1246	12.754	-0.196301	0.125458	0.192982
8030453O22Rik	77209	4.4798	4.46017	5.26999	5.32143	2.92601	4.1113	4.80833	4.06871	4.88285	3.97859	0.298158	0.15203	0.226884
8030462N17Rik	212163	27.5941	25.6819	27.2646	27.1393	31.4787	29.8589	27.2081	30.3901	26.92	29.734	-0.1444	0.133084	0.202887
8430408G22Rik	213393	3.19986	3.0214	2.13413	2.48333	2.31509	4.19436	4.18286	2.37863	2.70968	3.26773	-0.261393	0.378236	0.477505
8430419L09Rik	74525	17.0534	15.5027	17.073	17.135	20.2892	20.1412	19.7415	21.9397	16.691	20.5279	-0.299514	0.0079013	0.0175683
8430429K09Rik	71523	3.31279	3.0214	2.9181	2.55428	1.67201	1.6196	1.72005	1.56489	2.95164	1.64414	0.842687	0.000997142	0.00277766
9030025P20Rik	100041574	2.93634	3.27319	2.3519	3.08643	1.83278	1.86877	2.18916	1.90916	2.91196	1.94997	0.582282	0.0154412	0.0316983
9030407P20Rik	100504389	2.55989	2.05024	3.70206	3.22833	2.28293	2.40864	3.08828	2.91069	2.88513	2.67264	0.106486	0.669019	0.745723
9030617O03Rik	217830	27.8199	28.4515	20.7315	20.6471	13.8905	19.6844	21.1097	21.0947	24.4125	18.9448	0.367261	0.0134392	0.0281202
9030624J02Rik	71517	170.835	175.961	176.523	173.656	133.535	164.203	166.767	159.493	174.244	156	0.159807	0.0846297	0.138002
9130011E15Rik	71617	14.644	15.143	17.9006	17.0286	16.7844	17.5665	18.1778	16.3061	16.179	17.2087	-0.0889916	0.458376	0.554426
9130019O22Rik	78921	8.39492	9.71165	11.9773	11.6717	10.5465	11.0881	11.2194	10.3283	10.4389	10.7956	-0.0487092	0.740426	0.804353
9130020K20Rik	108858	1.39288	1.11504	1.30661	1.59643	1.51124	0.955151	1.44641	0.938933	1.35274	1.21293	0.156362	0.620639	0.703121
9130023H24Rik	100043133	7.56672	7.51754	11.1062	10.1817	7.52403	8.13955	9.77303	7.38627	9.09303	8.20572	0.148288	0.380785	0.480192
9130208D14Rik	77700	1.69404	1.07907	0.958181	1.24167	0.771696	0.955151	0.899119	0.719849	1.24324	0.836454	0.58054	0.0674461	0.113797
9130221H12Rik	77124	8.01846	8.34482	8.23164	8.30143	10.643	8.88706	9.96849	10.7664	8.22409	10.0662	-0.293322	0.0569553	0.0985497
9130401M01Rik	75758	19.5003	18.9917	15.026	16.8867	16.495	19.0615	17.1614	18.0275	17.6012	17.6864	-0.00478018	0.967197	0.976232
9230112E08Rik	320800	6.09855	6.69025	5.83619	5.74714	4.69448	4.90034	4.53469	3.44275	6.09303	4.39307	0.475259	0.014552	0.0301416
9230114K14Rik	414108	2.03285	3.23722	1.7857	1.73833	1.6077	1.95183	2.03279	1.90916	2.19852	1.87537	0.234076	0.412504	0.510932
9230116N13Rik	320054	1.12936	1.18698	0.958181	1.20619	0.610926	0.955151	0.664566	0.719849	1.12018	0.737623	0.612093	0.0617767	0.105719
9330020H09Rik	100048895	1.9952	2.30202	1.87281	1.77381	2.34724	1.95183	2.5019	1.53359	1.98596	2.08364	-0.0656937	0.810968	0.858795
9330104G04Rik	320950	1.54346	1.94233	1.17595	1.88024	0.996773	1.07974	1.25095	0.970231	1.63549	1.07442	0.613372	0.0549491	0.0955076
9330133O14Rik	100689703	2.86105	2.87753	3.0052	3.08643	3.95494	3.36379	4.06558	3.22367	2.95755	3.652	-0.303605	0.176741	0.256965
9330136K24Rik	319870	2.52224	1.47473	1.39372	2.09309	2.28293	2.4917	2.5019	2.28474	1.87095	2.39032	-0.346978	0.180737	0.261859
9330151L19Rik	414085	6.55029	7.4456	5.70553	8.23047	3.15109	3.61296	3.55738	3.06718	6.98297	3.34715	1.06559	6.02246e-08	4.02085e-07
9330159F19Rik	212448	0.677617	0.79132	4.44247	4.68286	1.25401	0.415283	0.390921	0.532062	2.64857	0.648068	2.01036	0.000242843	0.000779197
9330159M07Rik	319673	2.33401	2.5538	2.09058	2.09309	1.54339	2.24253	1.64187	1.94046	2.26787	1.84206	0.304334	0.228614	0.318488
9330160F10Rik	791118	1.61875	1.47473	1.17595	1.27714	1.57555	1.41196	1.40732	1.22061	1.38664	1.40386	-0.0146587	0.959763	0.970318
9330161L09Rik	77225	0.677617	0.755351	1.17595	0.886904	1.15754	1.24585	1.25095	0.688551	0.873955	1.08572	-0.310673	0.389618	0.488527
9330175E14Rik	320377	6.475	5.57521	4.18115	4.54095	1.12539	1.41196	1.64187	1.3771	5.19308	1.38908	1.90674	7.25694e-17	1.68028e-15
9330182L06Rik	231014	1.50581	1.5107	0.740412	0.674047	2.60447	0.622925	0.430013	0.625955	1.10774	1.07084	0.0398407	0.934341	0.951175
9430008C03Rik	68108	18.3709	17.5529	21.6462	22.0307	22.2827	22.7575	23.1816	17.9649	19.9002	21.5467	-0.113826	0.347228	0.446607
9430015G10Rik	230996	14.23	13.7042	18.2054	16.5319	9.90343	10.5482	8.24844	9.13895	15.6679	9.45975	0.726739	2.06998e-07	1.26103e-06
9430016H08Rik	68115	9.44899	8.74048	10.4529	10.4655	12.8294	12.9568	11.5713	13.239	9.77696	12.6491	-0.373051	0.00455755	0.0108169
9430020K01Rik	240185	4.4798	5.39536	3.74561	3.58309	6.4951	2.94851	3.04919	2.94199	4.30097	3.8587	0.153104	0.587772	0.675705
9430037G07Rik	320692	2.4093	2.5538	2.39545	1.91571	1.41478	1.78572	1.36822	1.28321	2.31857	1.46298	0.667536	0.010942	0.0234365
9430038I01Rik	77252	5.49622	5.57521	4.96512	4.75381	5.94849	5.89702	4.80833	5.6336	5.19759	5.57186	-0.100663	0.588158	0.675896
9430091E24Rik	434350	3.53866	3.27319	3.39719	3.68952	3.2154	3.90366	3.01009	2.7542	3.47464	3.22084	0.11342	0.61295	0.69678
9530052C20Rik	320229	1.58111	1.61861	1.30661	1.41905	1.6077	0.955151	0.899119	0.876337	1.48134	1.08458	0.443199	0.165484	0.243541
9530068E07Rik	213673	179.267	172.759	167.115	162.055	183.438	200.54	182.208	200.994	170.299	191.795	-0.171472	0.0520585	0.0911523
9530082P21Rik	638247	11.5948	11.654	9.62536	9.29476	5.94849	5.52327	5.19925	5.50841	10.5422	5.54485	0.925812	2.98628e-09	2.53568e-08
9630033F20Rik	319801	10.8419	11.3662	12.979	11.4233	11.9934	15.5731	15.7932	13.6771	11.6526	14.2592	-0.289902	0.0263005	0.0504625
9830144P21Rik	414086	3.80218	3.16528	2.87454	3.01548	3.92279	3.40532	3.12737	2.37863	3.21437	3.20853	0.00469575	0.984712	0.989204
9830147E19Rik	208111	4.21628	5.57521	6.01041	7.94666	2.50801	3.15615	3.08828	2.66031	5.93714	2.85319	1.06054	3.67829e-06	1.75822e-05
9930012K11Rik	268759	3.95276	3.20125	4.66024	4.64738	4.08356	3.86213	3.20555	4.53818	4.11541	3.92235	0.0644616	0.766824	0.824308
9930021J03Rik	240613	66.2182	68.1974	57.665	60.8771	65.3047	64.0782	65.0102	63.2841	63.2394	64.4193	-0.0261573	0.752907	0.813607
9930022D16Rik	320509	2.25872	1.65458	1.95991	2.09309	3.18324	3.48838	3.87012	3.31756	1.99158	3.46483	-0.795805	0.000911774	0.0025582
9930104L06Rik	194268	15.2087	14.6034	18.2054	16.3545	15.9162	15.1578	18.1387	14.6161	16.093	15.9572	0.011748	0.924219	0.943365
9930111J21Rik1	667214	22.9637	24.2791	32.2733	31.4319	9.2925	10.9219	11.454	10.516	27.737	10.5461	1.39585	1.44513e-27	8.72606e-26
9930111J21Rik2	245240	53.08	53.3062	78.5273	85.4621	20.257	23.0067	29.0454	23.3481	67.5939	23.9143	1.49948	2.66437e-24	1.20219e-22
A130010J15Rik	319266	8.58314	8.88436	9.05916	9.18833	4.30863	5.35715	4.73015	5.07024	8.92875	4.86654	0.877017	1.01483e-08	7.88684e-08
A130014A01Rik	402737	5.08213	3.84869	5.18289	3.83143	3.47263	3.69602	3.87012	2.72291	4.48628	3.44042	0.383742	0.0833598	0.136253
A130051J06Rik	791370	1.88227	1.65458	1.52438	1.77381	1.80062	1.6196	1.56368	1.3771	1.70876	1.59025	0.105891	0.694051	0.767785
A230028O05Rik	319487	1.12936	1.00713	1.95991	2.98	0.932465	0.955151	0.625474	0.688551	1.7691	0.80041	1.14106	0.00168283	0.00443877
A230046K03Rik	319277	270.143	262.682	253.134	280.652	198.712	226.205	216.609	230.884	266.653	218.102	0.29007	0.00141259	0.00380086
A230050P20Rik	319278	18.5215	17.5169	17.2473	16.5674	12.4114	14.2857	12.7049	11.2672	17.4633	12.6673	0.465617	0.000113839	0.000396011
A230056P14Rik	320845	4.14099	3.34512	3.48429	3.19286	1.89708	1.70266	1.72005	1.65878	3.54082	1.74465	1.01776	1.853e-05	7.66721e-05
A230072C01Rik	320742	1.76933	1.76248	1.74215	1.70286	0.932465	1.03821	0.820935	0.719849	1.74421	0.877864	0.992747	0.000670056	0.00194297
A230083G16Rik	442825	1.95756	1.5107	1.35016	1.70286	1.73631	1.37043	1.52459	1.4397	1.63032	1.51776	0.103116	0.713151	0.782732
A230103J11Rik	320466	3.01163	2.91349	3.13586	2.94452	3.2154	3.11462	2.93191	3.22367	3.00138	3.1214	-0.0586647	0.783834	0.836968
A330023F24Rik	320977	21.6084	21.1498	19.9476	20.5407	24.2119	30.0665	28.2245	21.0321	20.8116	25.8838	-0.312248	0.0144866	0.0300212
A330035P11Rik	319727	1.73169	1.58264	1.52438	1.20619	0.964619	0.789038	1.17276	1.28321	1.51122	1.05241	0.512848	0.0942871	0.151425
A330040F15Rik	74333	0.790553	1.18698	1.91636	2.02214	0.610926	0.913623	0.625474	0.657253	1.47901	0.701819	1.07565	0.00212633	0.00547608
A430005L14Rik	97159	12.2347	12.9129	13.8501	13.7648	13.1188	14.4519	13.995	14.929	13.1906	14.1237	-0.0988191	0.414239	0.512618
A430033K04Rik	243308	5.75974	5.75505	6.5766	7.55643	5.62695	7.14287	7.34932	7.35497	6.41196	6.86853	-0.0976317	0.581283	0.669682
A430035B10Rik	320312	2.10814	1.5107	1.52438	1.73833	0.771696	0.705981	0.938211	0.84504	1.72039	0.815232	1.07339	0.000304494	0.000957559
A430046D13Rik	654440	2.59753	2.12218	2.78743	2.83809	1.54339	0.74751	1.17276	1.53359	2.58631	1.24931	1.02983	0.000129022	0.000443195
A430057M04Rik	319486	1.9952	2.66171	2.70033	1.77381	3.72986	3.32226	3.59648	2.40993	2.28276	3.26463	-0.516214	0.0449798	0.0804269
A430105I19Rik	214239	2.55989	2.66171	2.00347	1.6319	1.38262	0.789038	0.820935	0.84504	2.21424	0.959408	1.19526	0.000410027	0.00125203
A430106G13Rik	320327	0.790553	0.719381	1.1324	1.45452	0.771696	1.49502	1.68096	1.4397	1.02421	1.34684	-0.388897	0.322579	0.421059
A430108G06Rik	319650	4.10335	3.92063	2.13413	2.80262	1.06108	1.24585	2.07188	1.75267	3.24018	1.53287	1.08129	0.000697039	0.00201127
A430110L20Rik	329307	1.61875	1.25892	2.00347	1.95119	1.02893	1.24585	1.87642	1.09542	1.70808	1.31166	0.384428	0.239266	0.330412
A530013C23Rik	329562	3.46337	3.38109	2.39545	1.88024	3.76202	3.03157	3.08828	2.00306	2.78004	2.97123	-0.093815	0.737957	0.802592
A530017D24Rik	100504229	13.9664	13.3445	16.6811	15.9288	11.6397	14.4934	15.4805	12.5504	14.9802	13.541	0.147327	0.272749	0.367102
A530040E14Rik	621875	3.08692	2.87753	1.39372	1.59643	1.44693	1.07974	1.21186	0.876337	2.23865	1.15371	0.956857	0.00318624	0.00787798
A530054K11Rik	212281	41.184	38.1992	39.6338	45.4805	38.424	45.6396	44.9559	41.939	41.1244	42.7396	-0.054106	0.546979	0.637918
A530064D06Rik	328830	0.752907	0.79132	2.52611	3.47667	0.996773	1.07974	1.36822	0.813742	1.88675	1.06462	0.826208	0.0401501	0.072913
A630001G21Rik	319997	31.208	28.7033	30.7053	32.2124	27.6524	26.6196	26.2308	25.6016	30.7073	26.5261	0.211105	0.0214547	0.0422481
A630033H20Rik	213438	15.2087	15.5386	27.0033	26.6781	39.2922	46.1795	44.3305	48.8245	21.1072	44.6567	-1.08192	2.84259e-11	3.33159e-10
A630052C17Rik	320757	2.74811	4.02854	4.05049	3.65405	2.54016	2.69934	2.58008	2.31603	3.6203	2.5339	0.515192	0.0234395	0.0456486
A730011C13Rik	319916	2.63518	2.87753	3.83272	3.58309	4.18002	4.94187	4.69105	3.19237	3.23213	4.25133	-0.392962	0.0966973	0.154711
A730017L22Rik	613258	6.51265	7.51754	9.14627	9.15285	4.21217	3.77908	3.79194	3.78703	8.08233	3.89255	1.05122	2.27943e-08	1.66584e-07
A830010M20Rik	231570	9.14783	9.4239	10.148	9.54309	8.26357	6.22925	5.78563	6.60383	9.5657	6.72057	0.50499	0.00172818	0.00454479
A830080D01Rik	382252	14.5311	13.6323	14.1985	15.7514	16.7844	17.2758	16.6142	14.2405	14.5283	16.2287	-0.157883	0.195079	0.279351
A930005H10Rik	68161	1.20465	1.65458	1.17595	1.31262	1.09324	1.16279	1.09458	1.06412	1.33695	1.10368	0.280312	0.361355	0.461022
A930006K02Rik	100503120	0.790553	0.827289	1.00173	1.13524	1.22185	1.37043	1.4855	0.751146	0.938703	1.20723	-0.352358	0.290838	0.387092
A930007I19Rik	77779	3.35044	2.33799	2.30834	2.12857	2.54016	2.74087	1.95461	2.37863	2.53134	2.40357	0.0746483	0.766054	0.823713
A930011O12Rik	268755	0.0376454	0.0719381	3.44074	3.93786	0.064308	0.332226	0.273645	0.156489	1.87204	0.206667	3.16692	0.00035833	0.00110819
A930024E05Rik	109202	2.67282	2.91349	3.52785	3.44119	0.675234	1.45349	1.25095	1.3458	3.13884	1.18137	1.41422	1.7838e-07	1.10085e-06
A930039A15Rik	791276	2.18343	2.48187	2.04702	1.59643	1.31831	1.07974	1.09458	1.28321	2.07719	1.19396	0.79061	0.00474704	0.0112084
AA386476	546058	0.677617	1.15101	1.48082	1.06429	0.932465	1.07974	0.938211	0.719849	1.09343	0.917565	0.252664	0.462705	0.558948
AA414768	245350	1.05407	1.00713	0.783966	0.886904	1.22185	0.622925	1.21186	0.84504	0.933019	0.975418	-0.0659123	0.838952	0.879582
AA415398	433752	2.4093	2.4459	1.08884	1.52548	1.09324	1.24585	0.977303	1.4084	1.86738	1.1812	0.660789	0.0584959	0.100889
AA467197	433470	3.04928	3.74078	3.52785	3.1219	5.81987	8.5133	6.4502	10.8916	3.35995	7.91875	-1.23788	1.19843e-11	1.48067e-10
AA474331	213332	17.0534	16.4379	15.9842	15.0064	9.03527	8.05649	8.71754	8.54429	16.1205	8.5884	0.906652	8.70989e-14	1.41916e-12
AA474408	767812	3.87747	4.24435	3.04876	3.68952	4.14786	4.1113	3.87012	2.7855	3.71503	3.7287	-3.73418e-05	0.999888	0.999888
AA987161	100416706	45.2874	46.1483	48.0832	52.7531	43.9545	46.0134	46.0114	51.6726	48.068	46.913	0.0348452	0.708271	0.77925
Aaas	223921	23.1143	23.236	24.4772	22.4919	12.2507	16.8605	18.6079	18.4657	23.3298	16.5462	0.496396	0.000207616	0.00067854
Aacs	78894	20.5167	19.6751	15.81	15.2193	26.1412	22.01	21.3443	21.6893	17.8053	22.7962	-0.356493	0.00662916	0.0150855
Aaed1	66129	18.4839	19.4952	15.6358	17.7736	12.1542	16.9851	15.7932	19.7176	17.8471	16.1625	0.143963	0.330799	0.429377
Aagab	66939	94.5275	95.39	82.9262	85.7104	85.6582	94.3108	96.1275	96.1467	89.6385	93.0608	-0.0535983	0.523463	0.616504
Aak1	269774	29.0622	30.25	33.8412	32.1769	36.3983	47.6745	48.4351	39.0596	31.3326	42.8919	-0.451919	3.12216e-05	0.000123435
Aamdc	66273	5.94797	5.50327	4.83446	4.47	4.63017	4.19436	4.33923	5.22673	5.18892	4.59762	0.172009	0.385826	0.485221
Aamp	227290	141.622	141.502	128.178	113.666	153.535	137.459	161.411	131.106	131.242	145.878	-0.152451	0.109165	0.171692
Aanat	11298	1.76933	1.76248	1.04529	1.45452	3.56909	2.4917	3.51829	2.56642	1.50791	3.03637	-1.00235	0.000216794	0.000704796
Aar2	68295	43.9698	46.1843	39.5032	39.3786	46.559	51.5782	47.6142	54.3016	42.259	50.0132	-0.242712	0.00652602	0.014884
Aars	234734	284.298	282.753	236.017	224.884	258.84	244.976	265.357	231.541	256.988	250.178	0.03884	0.700229	0.772402
Aars2	224805	13.0629	13.5603	15.4616	12.6295	10.3214	11.5033	12.2358	11.5489	13.6786	11.4024	0.262058	0.0424654	0.0765373
Aarsd1	69684	1.01643	1.22295	1.04529	1.52548	0.80385	1.28738	0.899119	1.15802	1.20253	1.03709	0.220603	0.497864	0.591753
Aasdh	231326	13.5523	12.6611	12.8483	12.7005	4.72664	5.52327	5.98109	4.60077	12.9406	5.20794	1.31774	4.55936e-20	1.45876e-18
Aasdhppt	67618	22.4743	22.6605	21.6462	20.2924	24.4049	24.3356	21.3834	27.2916	21.7683	24.3539	-0.163238	0.130919	0.200107
Aatf	56321	24.9589	22.4087	22.8657	26.5007	26.0447	28.7791	29.7882	27.1978	24.1835	27.9524	-0.207288	0.0393662	0.0717009
Aatk	11302	41.4476	44.6736	27.1339	20.2214	42.8613	30.6894	30.0227	26.2901	33.3691	32.4659	0.0395591	0.840521	0.881077
AB124611	382062	43.4804	45.1412	29.181	29.9419	29.3244	34.7177	37.0202	34.052	36.9361	33.7786	0.130187	0.324096	0.422417
Abat	268860	1.80698	1.47473	2.74388	2.73167	2.8617	0.913623	1.17276	0.469466	2.18931	1.35439	0.684214	0.100393	0.159876
Abca1	11303	2784.97	2799.94	2776.94	2843.45	3152.05	4034.48	3978.99	3254.9	2801.32	3605.11	-0.363914	0.000659463	0.00191316
Abca2	11305	63.3572	68.5571	58.6232	49.6312	64.6295	42.9818	46.6369	41.9703	60.0422	49.0546	0.290946	0.0259248	0.0498115
Abca3	27410	110.188	119.345	112.935	111.821	100.385	114.037	116.299	108.728	113.572	109.862	0.0483068	0.574459	0.663372
Abca5	217265	5.23271	6.07877	5.53132	5.42786	5.56264	5.23257	4.10467	5.00764	5.56766	4.97688	0.160573	0.432623	0.530611
Abca7	27403	87.9772	91.3255	85.4523	79.0055	96.4619	80.8141	85.4945	82.7513	85.9401	86.3804	-0.00776162	0.9288	0.946785
Abca9	217262	164.661	158.803	196.775	204.556	156.333	181.603	181.192	169.978	181.199	172.277	0.0729545	0.449975	0.546901
Abcb10	56199	17.9192	18.2363	17.3779	16.6383	15.241	12.9984	11.4931	15.3672	17.5429	13.7749	0.345866	0.00712639	0.0160363
Abcb1a	18671	3.08692	3.12931	2.65677	2.44786	1.15754	0.415283	1.05549	0.813742	2.83021	0.860514	1.70013	2.34141e-08	1.70458e-07
Abcb1b	18669	75.8178	72.3338	75.5656	76.3093	46.0123	55.6064	56.8399	57.2749	75.0066	53.9334	0.476302	6.76895e-08	4.47318e-07
Abcb4	18670	29.7775	28.2717	45.6878	46.8286	19.1316	22.6745	19.5461	22.4405	37.6414	20.9482	0.845008	8.6645e-09	6.82849e-08
Abcb6	74104	13.477	13.5963	15.7229	15.3612	14.5014	16.113	16.0278	16.9947	14.5394	15.9092	-0.130468	0.282545	0.378016
Abcb7	11306	109.473	107.763	100.173	104.194	75.8834	79.1945	75.8387	81.8123	105.401	78.1822	0.431028	3.85296e-08	2.67234e-07
Abcb8	74610	34.3702	30.9334	31.2715	28.8067	24.5335	26.8688	26.0354	27.9176	31.3455	26.3388	0.250875	0.0118241	0.025138
Abcb9	56325	2.0705	2.84156	2.39545	1.6319	1.99355	2.45017	2.30644	1.81527	2.23485	2.14136	0.0651285	0.808875	0.856947
Abcc1	17250	168.237	170.709	174.563	179.226	133.953	148.547	148.355	137.804	173.184	142.165	0.284988	0.00120032	0.00328566
Abcc10	224814	6.85146	7.62544	7.97032	7.80476	5.94849	5.14951	7.23204	5.25802	7.563	5.89702	0.359356	0.0403135	0.0731774
Abcc3	76408	273.983	277.429	237.89	224.777	243.759	259.261	276.029	243.278	253.52	255.582	-0.0115373	0.907922	0.931905
Abcc4	239273	21.5332	21.9052	26.35	24.0528	19.2602	22.6745	24.628	29.5138	23.4603	24.0191	-0.0351197	0.79345	0.844746
Abcc5	27416	108.946	108.447	138.152	140.805	73.7934	80.3158	79.787	77.7436	124.087	77.91	0.671486	1.26851e-11	1.55944e-10
Abcd1	11666	69.1545	71.5065	86.3234	79.2183	42.7648	43.4386	40.6558	42.4398	76.5507	42.3247	0.854325	4.30622e-21	1.4942e-19
Abcd2	26874	109.548	104.706	104.834	110.615	58.2952	68.3971	66.4566	72.11	107.426	66.3147	0.69614	2.88922e-15	5.6943e-14
Abcd3	19299	66.1806	67.0104	59.4072	58.6776	56.8804	59.3855	56.6836	61.0619	62.8189	58.5028	0.102827	0.214012	0.301867
Abcd4	19300	12.0842	10.9706	13.2839	13.2326	9.96773	10.2575	9.77303	10.2657	12.3928	10.066	0.298947	0.0209549	0.0413724
Abce1	24015	140.229	143.013	145.731	155.847	172.249	181.811	177.048	186.316	146.205	179.356	-0.294782	0.000760395	0.00217523
Abcf1	224742	88.9184	86.9013	101.262	103.519	108.648	109.012	132.366	95.1452	95.1504	111.293	-0.225774	0.0233652	0.04554
Abcf2	27407	65.1265	66.4349	73.083	68.3981	70.0957	78.2393	78.4579	72.9551	68.2606	74.937	-0.134411	0.0994679	0.158587
Abcf3	27406	59.7808	57.2987	58.1006	57.4359	53.1184	51.1214	55.2763	47.1344	58.154	51.6626	0.171195	0.0380822	0.0695783
Abcg1	11307	318.367	325.844	352.393	331.951	473.21	551.994	573.951	524.832	332.139	530.997	-0.676887	6.37923e-12	8.1261e-11
Abcg2	26357	29.5893	26.9049	23.4319	25.33	20.5142	18.8123	18.0215	20.9382	26.314	19.5716	0.42622	0.000167332	0.000559045
Abcg3	27405	6.0609	5.64714	7.05569	8.94	12.0577	18.0648	20.5234	18.6535	6.92593	17.3248	-1.3208	3.19679e-12	4.21155e-11
Abhd10	213012	15.1711	14.3157	15.7664	16.2836	12.8616	16.3622	17.0833	15.6489	15.3842	15.489	-0.00833763	0.951046	0.963958
Abhd11	68758	8.77137	10.467	8.84139	8.47881	7.39542	7.1844	7.15386	7.22978	9.13964	7.24086	0.335944	0.0241422	0.0468099
Abhd12	76192	763.41	763.731	775.691	766.818	683.529	637.75	611.401	657.535	767.413	647.554	0.244957	0.00620323	0.0142267
Abhd13	68904	58.5009	56.1837	51.0449	58.3228	69.2597	63.6214	67.4339	70.1696	56.0131	67.6211	-0.271593	0.00110088	0.00303506
Abhd14a	68644	3.87747	4.74792	2.61322	1.95119	4.63017	5.31562	5.04288	5.00764	3.29745	4.99908	-0.59709	0.0198273	0.039386
Abhd14b	76491	9.97602	10.6828	5.3571	5.03762	4.95171	7.4751	7.97479	7.60536	7.76339	7.00174	0.151515	0.541439	0.633195
Abhd15	67477	8.88431	9.92746	4.74735	4.64738	4.50156	3.19768	2.69736	4.66337	7.05163	3.76499	0.901095	0.000839313	0.00237506
Abhd16a	193742	39.1512	45.1052	35.714	32.4252	42.2825	43.314	44.0959	41.5634	38.0989	42.814	-0.167674	0.095174	0.15269
Abhd17a	216169	27.8576	33.775	31.5329	26.2169	30.9643	29.5682	26.8172	32.4871	29.8456	29.9592	-0.00685571	0.949756	0.963126
Abhd17b	226016	30.6433	27.7322	29.3116	32.8509	36.9771	36.7526	31.9774	40.4993	30.1345	36.5516	-0.279143	0.00571006	0.0131963
Abhd17c	70178	51.0095	52.371	55.4874	55.0236	52.3788	51.0798	46.7933	45.0062	53.4728	48.8145	0.131524	0.124524	0.191712
Abhd2	54608	94.264	98.0517	103.092	97.8788	102.764	90.2825	85.2208	89.0734	98.3215	91.8352	0.0979261	0.243526	0.335056
Abhd3	106861	5.08213	4.85582	2.61322	2.58976	3.34401	1.82725	1.72005	1.75267	3.78523	2.161	0.804263	0.00824384	0.0182344
Abhd4	105501	117.341	114.238	95.8616	95.5019	94.0182	113.663	118.488	114.393	105.735	110.141	-0.058435	0.553529	0.643972
Abhd5	67469	48.7131	46.7598	43.1181	42.394	47.3628	57.143	52.188	53.7696	45.2463	52.6158	-0.21682	0.0151869	0.0312517
Abhd6	66082	8.65844	7.51754	10.6271	8.62071	5.11248	6.56147	6.76294	7.16719	8.85594	6.40102	0.466874	0.00630032	0.0144225
Abhd8	64296	11.1807	12.1935	11.8466	10.9621	9.42112	8.72095	8.52208	10.2344	11.5457	9.22463	0.320935	0.0189927	0.0378992
Abi1	11308	254.445	244.77	287.149	296.226	294.273	311.878	295.028	335.95	270.647	309.282	-0.192593	0.047907	0.0849948
Abi2	329165	81.8787	79.8873	81.0969	84.2204	130.32	161.462	159.3	161.747	81.7708	153.207	-0.905504	6.49151e-25	3.12353e-23
Abi3	66610	12.3853	12.805	10.7578	8.94	12.8294	8.18108	8.79573	9.32673	11.222	9.78324	0.194871	0.239237	0.330409
Abi3bp	320712	1.50581	1.5107	2.43901	2.41238	2.34724	1.32891	1.52459	1.87787	1.96698	1.76965	0.140997	0.625805	0.707347
Abl1	11350	129.952	133.769	132.752	128.849	117.201	114.078	118.254	109.229	131.33	114.691	0.195528	0.0100469	0.0217196
Abl2	11352	189.206	187.363	152.917	163.226	385.751	349.212	342.994	380.581	173.178	364.634	-1.07411	6.66006e-27	3.83358e-25
Ablim2	231148	2.22108	2.05024	1.00173	1.52548	1.99355	0.49834	0.860027	0.438169	1.69963	0.94752	0.833906	0.0563296	0.0976454
Abr	109934	345.434	352.137	322.733	309.53	266.235	279.61	276.85	239.209	332.458	265.476	0.324741	0.000608167	0.00177859
Abracl	73112	29.4387	30.286	29.0938	33.7733	46.8484	55.025	53.5562	64.9742	30.648	55.1009	-0.845872	4.90053e-16	1.05165e-14
Abt1	30946	13.0629	11.654	11.803	10.5719	13.7619	13.0399	13.4868	14.5848	11.773	13.7183	-0.222139	0.0799853	0.131491
Abtb1	80283	39.3771	38.1992	31.5764	27.9552	22.9258	23.505	23.1425	22.2214	34.277	22.9487	0.579272	1.46565e-06	7.59521e-06
Abtb2	99382	4.55509	4.02854	5.44421	3.68952	12.7973	4.9834	4.80833	4.69466	4.42934	6.82092	-0.627397	0.024794	0.0478703
Acaa1a	113868	61.5878	58.9533	57.4037	55.8395	44.5976	43.1894	37.9194	44.9123	58.4461	42.6547	0.45355	1.25596e-07	7.9583e-07
Acaa2	52538	30.0034	29.1349	33.1879	31.29	26.302	33.0981	29.9837	38.0894	30.904	31.8683	-0.0449831	0.693606	0.767365
Acaca	107476	47.772	48.6662	41.768	42.1102	61.5749	58.9287	60.6319	57.2749	45.0791	59.6026	-0.402373	2.77628e-06	1.3646e-05
Acad10	71985	11.8206	13.8121	8.9285	8.195	5.88418	7.97344	6.09837	5.66489	10.6891	6.40522	0.742393	0.000137644	0.000469277
Acad11	102632	27.1423	22.9123	19.1201	21.0729	15.5947	18.2309	17.2396	19.3107	22.5619	17.594	0.359629	0.00555934	0.0128964
Acad12	338350	12.2724	11.1864	8.88495	10.2171	3.34401	4.44353	4.14376	4.1939	10.6402	4.0313	1.40312	2.27147e-14	3.96317e-13
Acad8	66948	28.0458	28.1278	26.5242	25.7202	20.5142	22.8821	21.9698	24.0054	27.1045	22.3429	0.27882	0.00907861	0.0198527
Acad9	229211	24.0177	24.7467	28.005	29.6226	22.7972	27.0349	24.5889	30.2962	26.598	26.1793	0.0223944	0.841218	0.881658
Acadl	11363	62.1149	60.5719	43.031	45.6224	56.4945	74.834	73.9623	70.8581	52.835	69.0372	-0.384908	0.00175133	0.00459927
Acadm	11364	65.6159	68.2693	70.3392	69.4269	58.9061	67.6081	68.6458	76.7108	68.4128	67.9677	0.00926546	0.918962	0.939713
Acads	11409	47.772	47.0475	43.7279	42.0393	43.3436	47.3838	47.3015	47.2283	45.1467	46.3143	-0.0363358	0.672166	0.748282
Acadsb	66885	68.9287	67.478	53.0048	60.1676	42.2503	46.8855	43.9005	46.9153	62.3948	44.9879	0.472648	7.09545e-07	3.9176e-06
Acadvl	11370	45.7768	44.8175	45.6878	44.0259	41.7359	39.9502	34.1665	40.1237	45.077	38.9941	0.208159	0.0186738	0.0373294
Acap2	78618	174.863	178.011	181.009	185.434	153.182	172.841	174.898	178.992	179.829	169.978	0.0813679	0.356526	0.455711
Acap3	140500	25.4859	25.1424	25.4353	24.4076	47.1056	32.1429	31.821	38.2146	25.1178	37.321	-0.572924	2.89864e-06	1.41745e-05
Acat1	110446	31.1327	32.3362	37.369	39.7333	47.6522	69.9337	68.9585	74.3948	35.1428	65.2348	-0.89211	8.16843e-13	1.16188e-11
Acat2	110460	7.56672	6.69025	7.31702	6.20833	10.1928	9.05317	8.17025	10.5786	6.94558	9.49872	-0.454764	0.00607348	0.0139603
Acat3	224530	1.61875	1.22295	1.56793	1.52548	2.09001	1.82725	2.77554	1.87787	1.48378	2.14267	-0.528512	0.0596341	0.102508
Acbd3	170760	76.6083	75.2113	74.9994	79.2893	118.294	117.151	125.759	117.022	76.5271	119.557	-0.643387	1.07861e-16	2.44683e-15
Acbd4	67131	12.0089	12.0496	13.2839	14.2969	10.032	10.7143	9.89031	9.67101	12.9098	10.0769	0.35822	0.0069371	0.0156849
Acbd5	74159	128.408	129.165	144.25	149.958	133.6	129.693	132.522	128.665	137.945	131.12	0.0731286	0.384563	0.484055
Acbd6	72482	19.1615	20.7542	15.2873	14.829	15.6911	16.2376	14.425	17.6519	17.508	16.0014	0.129801	0.354182	0.453515
Accs	329470	18.2204	16.1141	16.3762	17.4543	10.6751	14.1196	11.6104	11.142	17.0412	11.8868	0.522618	8.42951e-05	0.000301845
Acd	497652	16.4887	17.2652	15.2002	14.7581	18.4885	21.7608	22.0089	20.1871	15.928	20.6113	-0.370172	0.00277881	0.00696709
Ace	11421	1.01643	1.29489	3.09231	3.19286	0.610926	0.74751	0.469105	0.751146	2.14912	0.644672	1.72573	5.76939e-05	0.000214381
Acer3	66190	71.5262	69.9239	84.5812	87.8035	45.7551	44.4353	39.6003	46.2268	78.4587	44.0044	0.833418	3.66411e-18	9.70633e-17
Acin1	56215	145.349	142.797	165.068	155.386	155.079	146.595	173.178	133.015	152.15	151.967	0.00179145	0.984807	0.989204
Acly	104112	218.983	215.527	225.956	206.471	233.277	230.897	243.622	247.002	216.734	238.7	-0.13939	0.107602	0.16971
Acn9	71238	6.81381	6.43846	5.18289	6.24381	3.72986	4.65117	4.33923	4.1313	6.16974	4.21289	0.554958	0.00219778	0.0056471
Aco1	11428	88.316	87.3329	86.5411	87.6262	72.8931	76.952	79.9825	84.5666	87.4541	78.5985	0.153951	0.0508385	0.0893973
Aco2	11429	203.247	206.93	209.711	199.731	190.834	216.529	213.287	226.596	204.905	211.811	-0.0478209	0.594045	0.680756
Acot1	26897	3.95276	4.17241	3.74561	4.54095	1.89708	2.07642	1.75915	2.97329	4.10294	2.17648	0.908714	0.000175035	0.000581938
Acot11	329910	3.83983	4.31629	4.26826	4.71833	2.25078	1.37043	1.64187	1.81527	4.28568	1.76959	1.26537	7.19902e-08	4.72443e-07
Acot13	66834	24.5824	24.5309	19.3378	20.7181	20.2892	24.1695	25.9181	27.9802	22.2923	24.5892	-0.140494	0.254827	0.347345
Acot2	171210	21.2696	20.4304	13.0661	12.0264	6.78449	6.14619	5.19925	6.76032	16.6981	6.22256	1.42189	1.99499e-14	3.52572e-13
Acot6	217700	2.86105	2.76962	2.00347	2.16405	0.739542	1.07974	0.977303	0.532062	2.44955	0.832161	1.57084	7.65352e-07	4.205e-06
Acot7	70025	8.84666	8.92033	7.40412	5.81809	8.58511	5.48174	6.13746	6.50993	7.7473	6.67856	0.210467	0.260455	0.353608
Acot8	170789	9.18547	7.94917	8.71073	8.51428	7.78126	8.22261	8.71754	8.79467	8.58991	8.37902	0.0355154	0.808733	0.85687
Acot9	56360	49.2025	53.5939	46.4282	47.0059	52.6039	54.9835	52.2271	59.5283	49.0576	54.8357	-0.160593	0.0702398	0.117588
Acox1	11430	122.874	125.964	111.933	110.686	130.995	143.148	145.266	136.709	117.864	139.03	-0.237876	0.00341484	0.00835597
Acox3	80911	212.094	218.548	176.61	176.033	126.333	118.439	119.661	111.577	195.821	119.002	0.71866	5.0317e-14	8.45573e-13
Acp1	11431	37.2313	35.8971	41.4195	41.0814	36.2697	42.6911	41.5158	46.8527	38.9073	41.8323	-0.104935	0.271586	0.365858
Acp2	11432	196.095	194.233	191.941	191.11	163.696	179.693	179.003	161.371	193.345	170.941	0.177927	0.0415057	0.0749879
Acp6	66659	23.1143	22.7684	22.3866	20.86	10.868	11.1296	10.7503	12.7695	22.2823	11.3794	0.967428	1.96135e-16	4.322e-15
Acrbp	54137	7.45378	7.04994	6.75082	7.05976	2.7974	2.28406	1.64187	1.4084	7.07857	2.03293	1.79808	1.04971e-15	2.14789e-14
Acsbg1	94180	1.27994	1.47473	5.3571	4.15071	1.47908	0.539868	0.54729	0.469466	3.06562	0.758927	1.99462	9.33682e-06	4.09875e-05
Acsf2	264895	17.3922	16.6896	13.5887	11.5652	9.74266	10.6728	10.1249	9.48322	14.8089	10.0059	0.566746	0.000307328	0.00096458
Acsf3	257633	7.64201	8.41676	6.70726	5.81809	7.20249	6.8937	7.58387	7.63665	7.14603	7.32918	-0.0366795	0.82152	0.866766
Acsl1	14081	56.3928	56.2916	59.5814	59.1743	55.337	57.8905	54.2208	56.336	57.86	55.9461	0.0484673	0.557199	0.647354
Acsl3	74205	25.373	23.6676	15.5922	19.299	31.3823	22.9652	23.6507	22.1901	20.983	25.0471	-0.254889	0.0954724	0.153069
Acsl4	50790	204.339	196.967	190.809	209.806	277.714	268.896	275.287	263.809	200.48	271.426	-0.437	6.71969e-07	3.72684e-06
Acsl5	433256	119.637	120.676	125.043	127.608	125.208	129.527	130.841	142.78	123.241	132.089	-0.100184	0.215992	0.304137
Acsl6	216739	0.752907	0.575505	2.30834	1.91571	0.771696	0.290698	0.312737	0.250382	1.38812	0.406378	1.74158	0.000265718	0.000844473
Acss1	68738	35.7631	36.5805	33.0572	34.4474	41.3179	57.932	59.2246	63.3467	34.9621	55.4553	-0.664766	7.13669e-09	5.70472e-08
Acss2	60525	8.1314	8.30886	5.48776	5.25047	4.50156	3.15615	3.63557	3.97482	6.79462	3.81702	0.827975	3.21714e-05	0.000126974
Acta2	11475	53.3811	49.2417	26.9162	26.075	14.9516	2.28406	2.30644	2.15955	38.9035	5.42541	2.8382	6.40413e-09	5.15258e-08
Actb	11461	7172.69	7299.24	11217.5	10315.4	10431.1	11676.7	11994	12269.8	9001.2	11592.9	-0.365057	0.0059439	0.013688
Actg1	11465	675.96	691.505	855.133	758.374	880.665	1030.32	921.831	1031.01	745.243	965.956	-0.374279	0.000390454	0.00119672
Actl6a	56456	30.8316	28.9191	36.498	35.9374	41.8323	43.1894	43.8614	46.9466	33.0465	43.9574	-0.412553	1.55812e-05	6.52154e-05
Actn1	109711	147.833	149.2	141.767	137.612	104.854	104.361	103.829	97.4299	144.103	102.618	0.489979	8.80408e-10	8.12958e-09
Actn4	60595	116.738	108.95	108.231	102.774	85.7547	104.07	109.849	90.7635	109.173	97.6092	0.162109	0.100529	0.160042
Actr10	56444	61.6631	61.3273	62.5431	67.5821	66.4301	69.2692	60.7492	74.7391	63.2789	67.7969	-0.0998093	0.249167	0.341217
Actr1a	54130	157.471	155.89	158.927	148.219	171.574	171.553	158.675	171.825	155.127	168.407	-0.118659	0.15221	0.227099
Actr1b	226977	82.2551	87.0092	89.8948	84.4333	100.32	97.9238	98.1212	89.8246	85.8981	96.5475	-0.168612	0.031473	0.0589545
Actr2	66713	422.419	397.89	458.707	493.828	498.419	523.008	513.084	567.867	443.211	525.594	-0.245985	0.0129746	0.0272594
Actr3	74117	653.072	652.119	763.539	810.382	643.691	698.714	686.34	724.731	719.778	688.369	0.0643616	0.525714	0.618682
Actr3b	242894	1.84462	2.01427	1.56793	1.70286	1.38262	1.03821	0.860027	1.3771	1.78242	1.16449	0.602771	0.0281008	0.0534836
Actr5	109275	12.6112	12.805	13.9372	13.1617	13.2474	12.7907	11.0631	11.6115	13.1288	12.1782	0.107434	0.39321	0.491932
Actr6	67019	11.5195	12.6611	10.9755	13.0907	6.68803	6.22925	6.33292	8.20001	12.0617	6.86255	0.810636	4.04009e-08	2.79584e-07
Actr8	56249	40.0923	40.9688	36.9771	35.3698	27.4917	27.7409	27.0127	28.5749	38.352	27.705	0.468962	1.90462e-07	1.17072e-06
Acvr1	11477	12.5359	12.2655	11.8901	10.4655	18.6172	14.6595	13.9168	13.771	11.7892	15.2411	-0.371867	0.00758004	0.0169365
Acvr1b	11479	34.1444	33.5591	41.7244	37.3564	30.9	26.2874	30.0618	27.9176	36.6961	28.7917	0.348349	0.000452526	0.00136489
Acvr2a	11480	23.1895	23.5238	25.2611	24.9398	31.4466	27.0349	28.3027	27.7611	24.2286	28.6363	-0.242201	0.0160292	0.032755
Acvr2b	11481	3.04928	3.09334	2.56967	1.73833	2.54016	1.70266	1.87642	1.81527	2.61265	1.98363	0.392139	0.159926	0.236832
Acvrl1	11482	43.8945	44.206	47.8219	42.2167	35.2086	28.1562	28.7327	30.3901	44.5348	30.6219	0.538194	1.39549e-08	1.06109e-07
Acy1	109652	2.29637	2.5538	1.08884	1.09976	6.46295	9.21928	8.09207	7.76184	1.75969	7.88404	-2.15398	1.18176e-14	2.16621e-13
Acyp1	66204	7.90553	7.33769	8.05743	7.13071	4.37294	5.52327	5.59017	5.35192	7.60784	5.20957	0.547673	0.000576983	0.00169503
Ada	11486	4.63038	4.13644	3.91983	3.8669	5.53048	6.85217	7.31023	7.35497	4.13839	6.76196	-0.706509	0.000437002	0.00132455
Adal	75894	13.8159	12.4453	13.4145	15.8933	12.2507	12.8322	13.0177	13.6771	13.8923	12.9444	0.102337	0.408152	0.506715
Adam10	11487	152.05	145.315	123.91	138.393	176.493	190.075	187.095	193.608	139.917	186.818	-0.416775	3.22538e-06	1.5605e-05
Adam12	11489	4.36686	5.57521	10.1916	10.1817	5.88418	1.37043	1.64187	1.03283	7.57882	2.48233	1.60277	0.000140504	0.000477443
Adam15	11490	190.26	192.794	191.288	172.024	222.956	211.338	227.673	211.604	186.591	218.392	-0.227099	0.0100441	0.0217172
Adam17	11491	315.807	306.996	330.877	347.596	407.102	530.856	539.589	494.912	325.319	493.115	-0.59997	1.07912e-08	8.34392e-08
Adam19	11492	18.898	19.6031	9.45114	9.33024	9.26035	1.12126	1.32913	1.47099	14.3206	3.29543	2.11338	1.95246e-05	8.03739e-05
Adam1a	280668	2.22108	2.26605	3.35363	2.48333	2.73309	2.61628	2.03279	1.69008	2.58102	2.26806	0.184195	0.497884	0.591753
Adam22	11496	10.3901	12.2295	9.23338	7.66285	15.1124	10.7974	10.8285	9.95269	9.87896	11.6727	-0.2413	0.193428	0.277343
Adam3	11497	4.96919	4.49613	4.22471	4.11524	5.08033	6.97676	8.79573	9.10765	4.45132	7.49012	-0.749496	0.000816057	0.0023151
Adam33	110751	11.4818	12.4813	10.54	8.01762	8.55296	5.77244	6.84112	5.35192	10.6302	6.62961	0.679273	0.00024477	0.000784972
Adam4	11498	1.35523	1.36682	0.958181	1.27714	0.964619	0.705981	0.586382	0.719849	1.23935	0.744208	0.728909	0.0343493	0.0635784
Adam8	11501	1981.65	2004.88	1920.24	1779.38	628.353	375.997	399.912	360.018	1921.54	441.07	2.12309	5.86233e-46	1.22394e-43
Adam9	11502	306.509	303.579	320.163	326.097	349.771	420.059	425.44	420.047	314.087	403.829	-0.362514	0.000134577	0.000459965
Adamts1	11504	106.386	109.85	150.217	148.752	127.523	53.3224	53.5171	51.5787	128.801	71.4852	0.848893	9.83069e-05	0.000347573
Adamts10	224697	54.0588	55.3924	70.6876	64.2474	53.7936	44.5183	46.5978	41.0314	61.0965	46.4853	0.393555	0.000215948	0.000702416
Adamts4	240913	4.21628	4.13644	2.00347	1.34809	13.0867	2.28406	2.85372	1.59619	2.92607	4.95516	-0.76059	0.128024	0.196207
Adamts6	108154	6.02326	4.4242	2.9181	3.61857	7.13818	5.60632	5.35562	7.44887	4.24603	6.38725	-0.588766	0.012878	0.0270747
Adamts7	108153	1.12936	1.65458	1.74215	1.88024	0.836004	1.20432	1.13367	0.500764	1.60158	0.91869	0.814847	0.0166724	0.0338728
Adamts9	101401	2.22108	1.11504	1.08884	1.70286	3.53694	1.03821	0.781842	1.09542	1.53195	1.6131	-0.0806377	0.850245	0.888699
Adamtsl4	229595	5.19506	4.5321	4.22471	5.17952	9.45327	6.64453	8.24844	5.03894	4.78285	7.34629	-0.617218	0.00561777	0.0130146
Adamtsl5	66548	6.1362	6.25862	7.1428	5.74714	5.49833	4.90034	5.4338	5.6336	6.32119	5.36652	0.232605	0.196254	0.280676
Adap1	231821	51.0095	54.1335	45.5136	43.6002	48.9062	37.1263	38.2712	41.939	48.5642	41.5607	0.22358	0.0298725	0.0563506
Adap2	216991	153.932	163.911	170.338	178.161	99.9989	83.555	100.389	77.2116	166.586	90.2885	0.883701	3.65792e-19	1.08313e-17
Adar	56417	111.807	114.49	146.994	141.018	108.262	112.542	108.95	100.779	128.577	107.633	0.256457	0.00994379	0.0215306
Adarb1	110532	20.705	19.4952	18.0748	17.2059	30.9643	18.6047	17.9824	18.6222	18.8702	21.5434	-0.192689	0.212121	0.299473
Adarb2	94191	0.150581	0.0359691	2.56967	3.68952	0.257232	0.166113	0.430013	0.28168	1.61143	0.28376	2.48437	0.00153731	0.00409795
Adat1	30947	4.0657	4.31629	3.78917	4.36357	2.50801	2.15947	2.30644	2.03435	4.13368	2.25207	0.875778	6.32208e-05	0.000232672
Adat2	66757	4.14099	4.96373	4.83446	3.83143	5.30541	5.2741	5.86382	6.13436	4.44265	5.64442	-0.347237	0.0682771	0.114912
Adat3	100113398	4.10335	3.66885	3.70206	2.3769	5.69125	4.65117	4.4565	5.571	3.46279	5.09248	-0.560556	0.0121298	0.0257125
Adck1	72113	20.1403	20.4664	19.4685	18.7669	11.2217	15.1578	13.4868	13.2703	19.7105	13.2842	0.571727	3.31514e-06	1.59827e-05
Adck2	57869	15.7358	14.3876	13.5887	14.7936	8.68157	8.5133	7.74024	7.66795	14.6264	8.15077	0.84415	8.57648e-11	9.4834e-10
Adck3	67426	5.00683	5.82699	3.35363	4.11524	3.76202	3.90366	3.63557	2.34733	4.57567	3.41214	0.428954	0.0813803	0.133445
Adck4	76889	21.872	20.5024	20.6009	18.4121	15.5304	16.9436	15.0505	15.3359	20.3468	15.7151	0.373017	0.000728213	0.00209485
Adck5	268822	14.6064	14.0639	16.7246	14.7581	10.9324	10.4236	9.89031	8.98246	15.0383	10.0572	0.579615	4.79515e-06	2.24332e-05
Adcy1	432530	1.84462	1.69055	2.26479	2.73167	2.0257	0.49834	0.54729	0.344275	2.13291	0.853901	1.30314	0.00256005	0.00648231
Adcy3	104111	77.4742	76.5062	64.0674	62.4026	65.6906	62.334	65.8702	56.9619	70.1126	62.7142	0.161366	0.089505	0.144878
Adcy5	224129	3.08692	2.73365	2.74388	3.08643	4.43725	1.6196	1.68096	1.00153	2.91272	2.18484	0.409744	0.248804	0.340849
Adcy6	11512	7.98082	8.52467	6.70726	6.98881	10.3536	4.9834	4.69105	5.13283	7.55039	6.29022	0.260244	0.278045	0.372968
Adcy7	11513	403.634	397.566	309.71	308.004	475.493	502.949	498.542	506.992	354.729	495.994	-0.483531	6.51158e-06	2.94563e-05
Adcy9	11515	37.7207	38.0912	41.7244	41.5071	22.1541	26.412	24.7062	24.0993	39.7609	24.3429	0.708962	8.7224e-14	1.41932e-12
Adcyap1r1	11517	0.263518	0.79132	2.04702	2.44786	2.37939	1.16279	1.09458	0.625955	1.38743	1.31568	0.0722286	0.883008	0.913717
Add1	11518	201.365	202.254	216.157	219.633	183.599	181.852	195.5	185.377	209.852	186.582	0.169554	0.05114	0.0898249
Add2	11519	0.188227	0.611474	2.17768	2.58976	1.02893	0.415283	0.781842	0.344275	1.39179	0.642582	1.10467	0.0465389	0.082866
Add3	27360	17.9192	20.3585	23.6496	24.3012	38.2632	28.9452	26.2699	33.8329	21.5571	31.8278	-0.563873	1.78985e-05	7.44091e-05
Adgb	215772	34.2196	31.9405	14.9825	16.4964	31.5431	29.1944	31.7428	29.5451	24.4098	30.5063	-0.320821	0.10728	0.169312
Adh5	11532	87.1867	89.4911	84.015	82.5176	93.5038	110.216	98.8249	127.851	85.8026	107.599	-0.32669	0.000833079	0.00235851
Adhfe1	76187	4.14099	4.67598	6.62016	7.76928	6.10926	6.81064	7.11477	5.72749	5.8016	6.44054	-0.149233	0.45455	0.550771
Adi1	104923	27.3305	25.9697	17.2908	16.9221	20.7072	29.6927	28.2245	31.8924	21.8783	27.6292	-0.335688	0.0502872	0.0885797
Adipor1	72674	439.321	443.643	318.856	304.563	372.986	410.258	396.98	416.886	376.596	399.278	-0.0843099	0.487548	0.582673
Adipor2	68465	154.497	149.775	122.037	121.967	120.127	105.731	111.686	116.334	137.069	113.47	0.272473	0.00356734	0.00868601
Adk	11534	21.7214	21.2577	21.2977	20.2924	20.1284	26.7858	25.879	31.6733	21.1423	26.1166	-0.304913	0.017225	0.0348672
Adnp	11538	1.05407	0.611474	0.871073	1.27714	1.35047	1.12126	1.29004	0.84504	0.95344	1.1517	-0.266998	0.438661	0.536576
Adnp2	240442	31.9986	34.1706	44.207	43.1745	29.3887	34.9253	33.8147	33.6764	38.3877	32.9513	0.220309	0.0414066	0.0748617
Ado	211488	59.442	58.0541	63.4577	66.234	66.4623	70.9304	64.2674	84.9108	61.797	71.6427	-0.213898	0.0250545	0.048305
Adora2b	11541	3.19986	2.37396	0.82752	1.17071	7.58834	7.59968	6.80203	7.16719	1.89301	7.28931	-1.93727	1.72941e-09	1.52381e-08
Adora3	11542	6.475	7.37366	3.83272	2.90905	2.82955	1.07974	1.0164	1.12672	5.14761	1.5131	1.75477	3.59933e-07	2.10225e-06
Adpgk	72141	27.7823	29.6745	30.6618	31.7512	28.0704	31.7692	29.4364	34.3649	29.9674	30.9102	-0.0449244	0.64762	0.726471
Adprh	11544	39.0383	37.9474	42.5084	37.3564	34.0189	34.1778	32.3292	37.7138	39.2126	34.5599	0.180497	0.039603	0.0720256
Adprhl2	100206	26.54	30.4658	28.0486	25.5783	28.8743	29.9834	33.4629	29.8268	27.6582	30.5368	-0.142263	0.149205	0.223156
Adprm	66358	11.9712	12.0137	10.0609	10.6429	10.7394	11.4203	11.024	12.5191	11.1722	11.4257	-0.0318621	0.810034	0.858027
Adrb2	11555	4.40451	5.17955	6.27173	6.77595	9.67835	8.59636	9.89031	10.9542	5.65793	9.77981	-0.791241	5.9044e-06	2.69471e-05
Adrbk1	110355	263.781	270.703	245.207	218.782	218.165	216.57	220.48	216.862	249.618	218.019	0.195265	0.0350776	0.0647417
Adrbk2	320129	18.5968	18.5241	13.2403	14.6871	12.3793	9.75915	9.30393	7.63665	16.2621	9.76975	0.735594	9.04258e-06	3.97951e-05
Adrm1	56436	39.7159	43.5585	40.6356	36.3986	55.7872	55.2742	57.0354	52.3925	40.0771	55.1223	-0.459685	8.15254e-08	5.30217e-07
Adsl	11564	33.9938	35.7892	34.3203	32.4607	32.4434	34.2193	33.6583	35.6794	34.141	34.0001	0.00579031	0.944752	0.959079
Adss	11566	125.698	121.324	124.433	132.291	135.175	121.553	119.856	142.248	125.936	129.708	-0.0430264	0.605381	0.689704
Adssl1	11565	49.8048	50.7164	45.2958	47.4317	42.186	33.3472	32.7201	35.0535	48.3122	35.8267	0.43025	6.01651e-06	2.74081e-05
Aebp1	11568	19.9144	18.8118	7.66544	7.02428	6.27003	1.37043	1.72005	0.625955	13.354	2.49662	2.41377	2.40177e-06	1.19294e-05
Aebp2	11569	54.0588	50.4286	52.8741	54.9526	90.9315	93.9786	97.1048	84.8169	53.0785	91.7079	-0.788409	1.2239e-21	4.38255e-20
Aen	68048	28.234	24.0633	26.6548	21.9952	26.945	28.0731	28.3809	25.9458	25.2369	27.3362	-0.115478	0.265594	0.359357
Aes	14797	167.145	171.537	206.444	181.815	164.468	190.407	195.148	202.747	181.735	188.192	-0.0504946	0.610069	0.694146
AF251705	140497	198.278	202.002	123.3	123.705	121.542	126.952	125.564	132.108	161.822	126.541	0.354925	0.0121555	0.0257552
AF529169	209743	18.4839	19.4952	12.3257	13.41	12.6687	5.48174	5.04288	5.79009	15.9287	7.24584	1.13287	4.22725e-06	1.9989e-05
Afap1	70292	14.23	13.8121	17.4215	17.7026	16.5593	15.6562	15.3241	11.6741	15.7915	14.8034	0.093774	0.505983	0.599701
Afap1l1	106877	4.81861	4.92776	7.05569	5.64071	8.8745	12.9568	13.3304	12.0496	5.61069	11.8028	-1.07351	2.88273e-08	2.0621e-07
Afap1l2	226250	2.22108	1.79845	2.26479	1.6319	3.72986	1.32891	1.68096	1.03283	1.97906	1.94314	0.0187898	0.957023	0.968422
Aff1	17355	164.736	158.624	131.009	125.728	249.997	230.233	245.303	222.402	145.024	236.984	-0.708369	1.59821e-11	1.94534e-10
Aff4	93736	370.92	372.676	290.982	306.195	436.587	477.949	485.954	451.282	335.193	462.943	-0.465703	6.19322e-06	2.81389e-05
Afg3l1	114896	33.9938	32.6599	38.1095	37.7821	38.006	40.324	36.6293	35.8046	35.6363	37.691	-0.0807763	0.374224	0.473518
Afg3l2	69597	37.8336	37.4078	40.4178	40.1236	41.1892	36.6695	40.6949	35.5543	38.9457	38.527	0.0153513	0.866684	0.900533
Afmid	71562	2.86105	3.0214	1.39372	2.19952	3.66555	2.99004	2.89282	2.09695	2.36892	2.91134	-0.291086	0.305046	0.402523
Afp	11576	3.04928	3.05737	1.26306	1.73833	0.900311	1.07974	0.74275	0.657253	2.27701	0.845013	1.43727	6.26007e-06	2.84021e-05
Aftph	216549	186.759	176.752	176.959	188.095	165.175	166.944	159.222	166.942	182.141	164.571	0.146364	0.0880576	0.142856
Aga	11593	40.2053	42.8392	38.8934	39.6624	31.4787	38.0399	37.2939	42.565	40.4001	37.3444	0.113767	0.245252	0.336764
Agap1	347722	86.2832	90.9658	92.9871	93.6216	94.3076	76.2045	83.2271	60.9054	90.9644	78.6612	0.209741	0.0508988	0.0894907
Agap2	216439	1.35523	1.65458	3.44074	2.94452	2.70093	0.872095	1.21186	1.06412	2.34877	1.46225	0.670194	0.0680623	0.114675
Agap3	213990	62.0772	66.8665	62.6737	56.8328	74.5972	70.349	71.4213	65.2871	62.1126	70.4137	-0.180933	0.0344097	0.0636711
Agbl3	76223	4.29157	3.16528	3.74561	3.68952	2.66878	2.69934	2.38462	1.84657	3.723	2.39983	0.635752	0.00480551	0.0113334
Agbl5	231093	15.0581	14.4596	16.1584	17.4188	15.4018	15.6977	17.4742	15.242	15.7737	15.9539	-0.0156187	0.90021	0.926537
Ager	11596	1.16701	1.36682	2.09058	1.13524	0.932465	1.24585	1.44641	1.00153	1.43991	1.15656	0.314814	0.334578	0.433062
Agfg1	15463	79.9588	81.0383	89.3286	88.7259	110.224	128.862	115.752	125.035	84.7629	119.968	-0.501116	3.115e-09	2.63535e-08
Agfg2	231801	22.3237	21.3656	19.1636	19.0152	26.302	22.9652	21.9698	28.0741	20.467	24.8277	-0.280068	0.0149978	0.0309094
Aggf1	66549	48.826	46.7598	55.0954	57.0102	62.2501	71.5533	75.526	68.5108	51.9229	69.46	-0.419461	5.5536e-06	2.55259e-05
Agk	69923	12.9877	13.4884	11.7159	11.3169	8.90665	9.88374	9.38211	9.48322	12.3772	9.41393	0.396075	0.00290901	0.00725744
Agl	77559	62.8301	58.3778	50.6529	53.0369	34.9835	32.2675	34.0492	34.0207	56.2244	33.8302	0.732721	5.51134e-16	1.17049e-14
Agmo	319660	18.4839	18.3083	10.4964	9.93333	12.2828	15.6977	13.995	15.6176	14.3055	14.3983	-0.0079348	0.966817	0.976168
Ago1	236511	122.724	117.583	119.381	111.182	114.082	124.668	125.72	123.814	117.717	122.071	-0.0523083	0.522739	0.616004
Ago2	239528	125.736	129.021	114.633	113.275	165.657	194.56	191.825	170.948	120.666	180.748	-0.582607	8.39752e-09	6.63506e-08
Ago3	214150	155.475	155.854	121.558	134.242	144.146	180.69	173.217	143.219	141.782	160.318	-0.176638	0.0901883	0.145773
Ago4	76850	52.7412	51.5077	41.9857	44.7709	37.6845	35.922	36.1211	38.1207	47.7514	36.9621	0.369558	0.000266947	0.000847708
Agpat1	55979	78.34	79.5276	79.3112	74.0033	62.1858	64.6596	69.154	64.0978	77.7955	65.0243	0.258908	0.00139627	0.00376186
Agpat2	67512	30.9821	33.0915	27.7001	24.8333	28.3598	29.1529	24.8626	32.1741	29.1518	28.6373	0.0249611	0.820692	0.86604
Agpat3	28169	109.435	110.389	103.571	95.7147	133.503	161.711	171.302	149.071	104.777	153.897	-0.554241	9.34996e-10	8.61427e-09
Agpat4	68262	8.1314	7.98513	8.01387	6.52762	13.9227	9.42693	8.17025	9.54582	7.66451	10.2664	-0.424825	0.0154118	0.0316458
Agpat5	52123	38.0218	35.8612	46.5589	48.6024	48.7454	54.942	51.9534	58.0261	42.2611	53.4167	-0.338347	0.00122323	0.00333578
Agpat6	102247	77.2483	77.9809	80.1387	77.7993	89.9347	92.1513	89.1691	94.5818	78.2918	91.4592	-0.224481	0.00310543	0.00770603
Agpat9	231510	2.4093	1.87039	1.48082	1.84476	5.17679	4.23589	4.41741	4.69466	1.90132	4.63119	-1.28042	3.77298e-08	2.62278e-07
Agps	228061	167.183	162.221	193.64	213.531	162.731	182.143	165.594	182.81	184.144	173.32	0.0873871	0.391026	0.489797
Agrn	11603	25.5612	26.9408	28.789	26.7845	22.347	13.912	14.1123	9.26414	27.0189	14.9088	0.856886	1.55135e-06	8.00901e-06
Agtpbp1	67269	58.4256	60.0324	65.8531	69.7462	50.8354	44.5183	46.5978	49.294	63.5143	47.8114	0.408792	4.47842e-06	2.10635e-05
Agtrap	11610	53.3435	55.0327	49.085	48.6378	51.993	58.2227	65.792	57.5879	51.5247	58.3989	-0.179741	0.0472522	0.0839539
Ahctf1	226747	116.927	113.626	99.3895	110.969	151.735	144.103	148.941	146.223	110.228	147.751	-0.422416	7.23207e-07	3.98589e-06
Ahcy	269378	14.6817	14.9631	15.0696	13.5874	15.4018	15.1994	17.2396	18.184	14.5754	16.5062	-0.180777	0.13076	0.199888
Ahcyl1	229709	79.3941	77.5134	63.0221	66.8371	74.34	74.045	76.1905	72.8925	71.6917	74.367	-0.0523802	0.586362	0.674678
Ahcyl2	74340	119.712	119.345	101.567	111.36	97.941	105.98	105.705	103.22	112.996	103.212	0.131224	0.106181	0.167942
Ahdc1	230793	13.4394	15.107	14.634	11.92	45.3693	30.9386	35.5738	28.2306	13.7751	35.0281	-1.34709	4.0018e-18	1.05329e-16
Ahi1	52906	7.86788	9.49584	11.1062	11.1395	6.36649	3.32226	4.10467	4.31909	9.90236	4.52813	1.12161	3.13201e-08	2.2147e-07
Ahnak	66395	367.494	369.438	359.013	366.008	931.179	838.29	835.281	1167.59	365.488	943.086	-1.36761	1.31014e-33	1.24141e-31
Ahnak2	100041194	45.438	50.8962	35.0607	36.5405	33.7938	41.4453	43.1577	38.7779	41.9838	39.2937	0.0968979	0.431603	0.529547
Ahr	11622	8.73373	9.85553	7.1428	6.24381	8.71373	3.52991	5.00379	5.47711	7.99397	5.68113	0.488273	0.0500581	0.0882392
Ahrr	11624	4.32922	5.03567	4.1376	3.40571	0.900311	0.415283	0.625474	0.688551	4.22705	0.657405	2.65729	1.2846e-19	3.95594e-18
Ahsa1	217737	93.2852	91.829	103.919	104.868	65.5941	71.8855	74.9396	75.3963	98.4752	71.9539	0.452675	9.92758e-08	6.38913e-07
Ahsa2	268390	19.2368	19.4233	22.8657	21.7114	22.4756	18.9784	19.7806	21.9084	20.8093	20.7858	-0.00103302	0.992497	0.994758
AI314180	230249	173.169	172.688	149.999	160.991	157.201	173.132	157.111	160.933	164.211	162.094	0.019003	0.832311	0.875301
AI413582	106672	32.6009	30.8615	29.3987	27.3876	20.9644	22.4668	24.4326	24.3184	30.0622	23.0455	0.383583	0.000124628	0.000430261
AI427809	381524	1.20465	1.0431	1.35016	1.59643	1.22185	1.6196	1.72005	2.06565	1.29859	1.65679	-0.350912	0.237457	0.32843
AI429214	621080	2.22108	2.12218	3.26652	4.00881	2.05785	2.36711	2.58008	2.50382	2.90465	2.37722	0.28908	0.264955	0.358675
AI467606	101602	24.7707	25.2863	28.005	25.9331	26.4949	22.716	24.3544	31.1413	25.9988	26.1766	-0.0124879	0.912453	0.934996
AI480526	100675	13.7029	12.5892	13.7194	14.6517	9.22819	10.299	8.9521	9.29544	13.6658	9.44369	0.534019	5.12248e-05	0.000192732
AI504432	229694	22.926	24.423	13.5887	16.6738	35.498	20.7226	21.4616	24.068	19.4029	25.4375	-0.390764	0.0292527	0.055368
AI597479	98404	28.7611	27.8041	29.6165	27.7778	20.1284	24.917	22.1652	27.6985	28.4899	23.7273	0.26333	0.0180514	0.0362795
AI606181	226118	13.7029	11.6899	10.6271	11.7426	11.9934	14.618	11.6885	13.1451	11.9406	12.8613	-0.105378	0.463321	0.559419
AI607873	226691	176.67	176.212	294.553	307.366	220.062	239.411	261.565	242.432	238.7	240.868	-0.0130834	0.932611	0.949963
AI662270	100043636	43.6686	44.3499	38.153	42.3231	66.623	98.2145	101.991	99.7147	42.1236	91.6359	-1.12036	3.47256e-21	1.21176e-19
AI837181	107242	34.2949	35.7173	35.1043	30.2612	25.6267	28.7791	26.6608	25.9458	33.8444	26.7531	0.339772	0.000491048	0.00146984
AI846148	68229	14.4558	14.4236	15.2002	11.2459	19.9998	17.608	18.4906	18.497	13.8314	18.6488	-0.433221	0.000681711	0.00197259
AI854517	101694	0.564681	0.647443	2.83099	2.58976	1.38262	1.24585	0.899119	0.625955	1.65822	1.03839	0.670538	0.136701	0.207554
AI987944	233168	21.4579	22.4807	23.1705	24.7624	16.8808	19.1446	20.3279	18.9977	22.9679	18.8378	0.287168	0.00915291	0.0199868
Aida	108909	54.2846	50.4286	56.5327	60.2031	61.8643	62.9569	65.5184	75.1146	55.3622	66.3636	-0.261998	0.00427168	0.0102033
Aif1	11629	87.4878	79.5996	66.1145	75.3869	122.539	111.171	107.23	120.997	77.1472	115.484	-0.581852	6.74439e-10	6.34178e-09
Aif1l	108897	1.2423	1.40279	1.39372	1.77381	0.964619	0.539868	0.54729	0.469466	1.45315	0.630311	1.19174	0.000381667	0.00117241
Aifm1	26926	25.1848	27.1926	22.0817	24.4076	22.1541	29.1529	29.3973	29.7329	24.7167	27.6093	-0.157913	0.179318	0.260108
Aifm2	71361	22.3237	23.0202	24.3901	20.8955	20.0962	19.8921	19.2333	22.8787	22.6574	20.5251	0.14042	0.191905	0.275543
Aig1	66253	25.1471	24.5309	15.9406	16.8157	21.9612	18.7293	19.7806	20.1245	20.6086	20.1489	0.0328935	0.826072	0.870524
Aim1	11630	17.8816	19.2435	24.5643	23.5917	19.8069	18.5216	18.2951	21.1886	21.3202	19.453	0.129932	0.277546	0.37246
Aim2	383619	66.2935	62.6941	54.1372	55.2364	85.7868	97.2178	101.522	101.78	59.5903	96.5768	-0.696035	3.12912e-14	5.36831e-13
Aimp1	13722	43.2169	41.0767	33.6234	33.8443	34.3083	33.804	35.1438	37.3695	37.9403	35.1564	0.110047	0.267611	0.361649
Aimp2	231872	6.28678	6.65428	8.71073	6.81143	7.78126	8.76247	6.99749	9.10765	7.1158	8.16222	-0.201279	0.228526	0.3184
Aip	11632	30.6433	30.1421	25.8273	26.1459	19.3245	18.7293	21.1488	19.655	28.1897	19.7144	0.516434	9.39906e-07	5.0713e-06
Airn	104103	1.27994	1.72652	2.30834	1.98667	1.99355	1.03821	1.56368	0.594657	1.82537	1.29752	0.488646	0.166803	0.245042
Ajuba	16475	7.79259	7.66141	6.62016	6.20833	7.2668	6.72759	6.41111	7.26108	7.07062	6.91664	0.0306774	0.857419	0.894073
AK010878	100233175	6.21149	6.79815	8.18809	6.49214	7.84557	7.80732	8.79573	7.91833	6.92247	8.09174	-0.227029	0.152244	0.227113
Ak1	11636	12.2724	12.0137	7.27346	6.98881	7.33111	5.89702	6.84112	6.13436	9.63708	6.5509	0.55698	0.00711081	0.01601
Ak2	11637	45.7391	45.7886	51.3933	50.9083	67.0411	75.1662	88.3482	82.8452	48.4573	78.3502	-0.693202	8.59426e-13	1.21683e-11
Ak3	56248	81.2011	83.0886	91.1143	93.1604	74.9831	87.9985	80.4516	97.0857	87.1411	85.1297	0.0334897	0.71485	0.784037
Ak4	11639	3.6516	3.05737	2.87454	2.55428	3.56909	2.69934	2.42371	1.62748	3.03445	2.57991	0.234384	0.365919	0.465207
Ak5	229949	1.27994	1.43876	1.1324	1.17071	1.15754	0.830566	1.25095	0.782444	1.25545	1.00538	0.321923	0.331283	0.429823
Akap1	11640	20.1403	20.2146	20.2525	19.1571	19.9355	18.8123	20.0152	18.5283	19.9411	19.3228	0.0452607	0.684	0.758697
Akap10	56697	95.8075	97.656	111.41	123.989	107.362	126.329	118.449	129.761	107.216	120.475	-0.168135	0.0800762	0.131622
Akap11	219181	90.5748	90.2464	86.9767	88.1938	69.0989	67.5666	67.0821	65.1306	88.9979	67.2195	0.405013	3.17631e-07	1.87384e-06
Akap12	83397	47.3955	45.321	69.773	74.0033	35.1121	4.94187	5.86382	4.31909	59.1232	12.5592	2.23323	2.09218e-06	1.04976e-05
Akap13	75547	258.134	257.898	242.333	242.586	284.627	255.607	262.973	258.989	250.238	265.549	-0.0857146	0.33516	0.433712
Akap17b	338351	8.39492	8.66855	7.97032	8.72714	4.11571	3.86213	3.4792	4.66337	8.44023	4.0301	1.06191	4.23542e-10	4.14391e-09
Akap3	11642	3.91512	4.31629	4.92156	4.47	0.0964619	0.24917	0.312737	0.125191	4.40574	0.19589	4.51433	5.55206e-43	1.03622e-40
Akap6	238161	2.59753	2.58977	6.44594	5.32143	5.30541	2.28406	2.30644	1.15802	4.23867	2.76348	0.612014	0.0991099	0.158139
Akap7	432442	19.7638	20.4304	17.3779	18.4476	8.93881	8.97012	10.1249	10.1718	19.0049	9.55139	0.992496	3.95758e-15	7.68471e-14
Akap8	56399	102.81	98.2315	101.001	101.497	102.475	88.7045	91.9056	84.0971	100.885	91.7955	0.136047	0.0992203	0.158261
Akap8l	54194	55.4516	57.3707	55.5309	52.1855	44.2117	37.1678	41.0467	34.9909	55.1347	39.3543	0.486186	2.04568e-07	1.24746e-06
Akap9	100986	119.261	117.547	113.675	127.501	114.468	115.241	125.564	117.867	119.496	118.285	0.0149664	0.856397	0.893386
Akip1	57373	24.5824	26.1495	15.5051	15.574	13.6333	16.819	15.3632	18.6535	20.4528	16.1172	0.344409	0.0456331	0.0814178
Akirin1	68050	203.812	198.226	134.842	136.832	267.553	304.818	295.067	307.094	168.428	293.633	-0.801693	4.31794e-10	4.21461e-09
Akirin2	433693	45.3627	43.9542	39.808	42.6424	52.1859	45.4735	44.8778	53.8947	42.9418	49.108	-0.194355	0.0336371	0.0624573
Akna	100182	69.1545	74.3121	67.9002	63.7152	85.401	97.9653	109.184	76.6795	68.7705	92.3075	-0.423861	5.15916e-05	0.000193988
Akr1a1	58810	1015.71	1030.44	885.098	851.251	955.488	1246.72	1242.35	1219.77	945.625	1166.08	-0.302289	0.00652164	0.0148793
Akr1b10	67861	45.6638	47.4432	52.787	50.7664	35.2729	39.3273	36.6684	39.6543	49.1651	37.7307	0.381631	1.4129e-05	5.96642e-05
Akr1b3	11677	70.4345	72.5496	73.7799	67.1209	81.6068	94.2693	92.8047	107.664	70.9712	94.0863	-0.407023	7.73077e-06	3.44279e-05
Akr1b8	14187	10.4654	10.0354	21.472	24.5495	9.99989	10.0914	11.7276	12.3939	16.6306	11.0532	0.588289	0.0114617	0.0244476
Akr1c12	622402	1.76933	2.01427	1.35016	0.993333	1.6077	1.20432	1.32913	2.22214	1.53177	1.59082	-0.0617056	0.849501	0.888147
Akr1c13	27384	16.3757	17.1213	13.8065	12.8779	16.0127	22.8821	19.3897	24.2558	15.0453	20.6351	-0.454829	0.00202098	0.00523542
Akr1e1	56043	23.0013	24.2432	25.0869	28.239	17.4596	21.4286	23.3771	22.2214	25.1426	21.1217	0.252683	0.0303218	0.0571281
Akr7a5	110198	13.0253	13.2726	13.5887	12.0619	13.2474	15.5316	13.2131	15.9932	12.9871	14.4963	-0.159267	0.221173	0.309945
Akt1	11651	293.107	294.982	275.39	252.661	371.411	405.316	436.815	405.369	279.035	404.728	-0.536444	1.50211e-08	1.13585e-07
Akt1s1	67605	31.848	34.3505	33.2314	30.4031	29.5495	30.9801	27.4427	27.8237	32.4582	28.949	0.165288	0.078034	0.128699
Akt2	11652	92.4194	90.1745	91.8547	82.2338	100.835	105.897	108.324	103.251	89.1706	104.577	-0.229914	0.00343714	0.00840221
Akt3	23797	27.2929	28.5235	37.1513	34.0926	20.3856	10.7558	10.7894	9.63971	31.7651	12.8926	1.29798	5.21467e-13	7.6107e-12
Aktip	14339	40.6194	39.8897	36.89	38.2078	26.4949	26.5366	28.7327	30.0771	38.9017	27.9603	0.4762	3.70675e-07	2.15988e-06
Alad	17025	10.2395	10.431	10.3658	9.04643	9.42112	9.3854	9.22574	10.829	10.0207	9.71532	0.0423171	0.755015	0.81517
Alas1	11655	110.527	110.389	82.6649	79.715	154.789	199.419	197.22	182.716	95.8239	183.536	-0.937158	5.97862e-16	1.25888e-14
Alas2	11656	1.73169	1.18698	1.08884	1.70286	1.22185	1.32891	1.60278	0.751146	1.42759	1.22617	0.230896	0.490932	0.585752
Alcam	11658	328.004	326.455	292.202	318.824	99.7416	96.1796	96.4012	84.9734	316.371	94.324	1.74613	1.15284e-73	9.46712e-71
Aldh16a1	69748	61.0231	58.198	51.4369	46.2255	49.5814	54.4851	54.8853	51.2657	54.2209	52.5544	0.0456279	0.635367	0.715659
Aldh18a1	56454	29.4387	32.9117	41.0711	36.434	30.8035	30.2326	29.0845	30.3901	34.9639	30.1277	0.213364	0.0325783	0.0607478
Aldh1b1	72535	8.50785	8.09304	6.92503	7.69833	5.14464	4.44353	4.49559	4.41298	7.80606	4.62419	0.754619	6.07303e-06	2.76451e-05
Aldh1l1	107747	6.85146	6.94203	4.48603	4.54095	3.69771	4.31894	4.33923	3.47405	5.70512	3.95748	0.531422	0.0217253	0.0427291
Aldh1l2	216188	8.58314	7.19381	6.14107	6.17286	10.3536	4.56811	4.61287	3.75573	7.02272	5.82257	0.267804	0.322003	0.420396
Aldh2	11669	326.611	335.951	302.524	283.029	311.894	336.753	375.91	325.904	312.029	337.615	-0.113592	0.244445	0.335983
Aldh3a2	11671	91.4783	89.4911	83.8408	82.0209	62.4752	67.8988	60.7882	69.481	86.7078	65.1608	0.412103	7.39334e-07	4.06931e-06
Aldh3b1	67689	49.3154	46.1843	46.1233	40.3364	28.5206	32.4336	33.2674	31.0474	45.4899	31.3172	0.539307	3.54357e-09	2.97747e-08
Aldh4a1	212647	10.6913	8.52467	6.75082	6.52762	5.98064	5.85549	6.37202	5.82138	8.1236	6.00738	0.436301	0.0202523	0.0401784
Aldh5a1	214579	2.8234	2.58977	2.70033	2.51881	2.09001	1.53655	2.03279	1.72138	2.65808	1.84518	0.522693	0.0432069	0.0777081
Aldh6a1	104776	38.0595	36.4007	27.4824	26.82	25.7875	34.9253	31.1955	31.1726	32.1906	30.7702	0.0664923	0.61745	0.700217
Aldh7a1	110695	31.1327	30.4298	28.8325	28.6648	29.9354	34.1778	37.2548	32.8314	29.765	33.5498	-0.171395	0.0855148	0.139372
Aldh9a1	56752	59.3668	58.162	61.7591	60.8062	47.9737	65.6147	61.3355	67.478	60.0235	60.6005	-0.0134511	0.893133	0.92056
Aldoa	11674	1206.61	1220.11	1056.79	987.302	612.983	564.827	622.855	559.447	1117.7	590.028	0.921683	6.20074e-20	1.95347e-18
Aldoc	11676	3.27515	3.23722	3.52785	2.58976	1.92924	1.57808	1.17276	1.62748	3.15749	1.57689	0.991853	0.000152875	0.000514936
Alg1	208211	24.9965	26.1135	21.1671	20.115	18.4242	18.6047	16.4969	19.2168	23.098	18.1857	0.344701	0.00502902	0.0117861
Alg10b	380959	78.2271	77.2616	94.1195	94.1893	70.7709	81.1878	76.6987	86.9139	85.9493	78.8928	0.123334	0.199218	0.283893
Alg11	207958	45.8144	44.8534	42.8133	44.9483	47.2985	50.5815	50.077	51.1718	44.6074	49.7822	-0.157806	0.0503705	0.0887011
Alg12	223774	12.4606	11.0785	10.4093	10.6429	9.90343	10.1744	11.0631	8.70078	11.1478	9.96043	0.165155	0.220224	0.308896
Alg13	67574	14.8699	14.6394	17.0295	16.7448	15.5947	15.2409	15.7541	15.5863	15.8209	15.544	0.0246384	0.841588	0.881821
Alg14	66789	11.8959	12.1575	10.0173	12.7714	12.6365	14.3688	15.285	16.6817	11.7106	14.743	-0.330334	0.0137921	0.0287512
Alg2	56737	35.8384	37.1201	24.2158	27.2812	24.8229	27.5333	25.6444	27.855	31.1139	26.4639	0.234595	0.0666073	0.112578
Alg3	208624	8.50785	8.20095	8.97205	7.87571	7.52403	8.804	10.5158	7.76184	8.38914	8.65141	-0.0421923	0.783148	0.836671
Alg5	66248	29.9657	27.2646	25.4353	27.7069	31.5109	28.7376	32.1337	31.6107	27.5931	30.9982	-0.167792	0.0725287	0.120894
Alg6	320438	12.4606	12.4093	14.5905	13.9067	11.5111	12.7492	12.0795	12.9573	13.3418	12.3243	0.113704	0.38038	0.479878
Alg8	381903	15.6605	16.7256	16.0277	16.0707	14.7908	17.1097	19.116	18.9038	16.1211	17.4801	-0.115987	0.327242	0.425657
Alg9	102580	26.5023	28.7033	28.7019	26.9619	26.6878	34.1778	29.3973	34.0833	27.7174	31.0865	-0.165218	0.121435	0.187673
Alkbh1	211064	23.7919	23.2001	25.3482	23.3078	33.0864	37.7908	34.3229	29.952	23.912	33.788	-0.497972	2.47367e-06	1.22569e-05
Alkbh2	231642	4.63038	5.97087	5.26999	5.07309	4.4051	3.90366	3.51829	3.50535	5.23608	3.8331	0.448883	0.014574	0.0301719
Alkbh3	69113	22.399	21.1138	21.3413	21.8533	22.7972	25.6645	26.2308	25.8207	21.6769	25.1283	-0.212364	0.044427	0.0795886
Alkbh4	72041	5.45858	6.90606	7.709	5.46333	6.55941	6.27077	7.4275	5.94657	6.38424	6.55107	-0.038515	0.833991	0.87627
Alkbh5	268420	162.816	171.069	141.767	141.976	129.87	121.761	115.869	121.686	154.407	122.296	0.336339	0.000112944	0.000393452
Alkbh6	233065	15.2087	17.8766	19.5556	17.2769	15.9484	16.4867	16.8096	16.6191	17.4795	16.466	0.0853779	0.476459	0.571843
Alkbh7	66400	4.81861	5.35939	6.05396	5.46333	5.6591	6.72759	5.39471	6.63513	5.42382	6.10413	-0.171752	0.316079	0.41411
Alkbh8	67667	15.284	14.1358	14.5034	16.6383	14.1156	15.7808	15.1287	16.8069	15.1404	15.458	-0.0294158	0.809298	0.857322
Alms1	236266	19.6509	18.0924	22.0382	21.8888	14.7908	14.1196	14.855	17.339	20.4176	15.2761	0.416391	0.001263	0.0034374
Alox5	11689	3.91512	3.77675	3.44074	3.51214	6.39864	4.19436	4.14376	5.6336	3.66119	5.09259	-0.47969	0.0290666	0.055058
Alox5ap	11690	75.4037	74.0603	56.6198	57.4714	65.4977	84.0948	79.2788	92.2971	65.8888	80.2921	-0.284805	0.0136591	0.0285356
Alpk1	71481	56.3928	55.788	60.6267	67.3693	33.408	34.9253	37.3721	30.171	60.0442	33.9691	0.823043	6.62634e-18	1.70403e-16
Als2	74018	47.9226	46.0764	47.6477	50.8728	42.5076	55.8556	57.27	45.5069	48.1299	50.285	-0.0615411	0.538458	0.630008
Als2cl	235633	39.8664	40.681	37.8046	36.5405	28.6492	26.8273	30.6091	28.3558	38.7231	28.6103	0.436582	4.53463e-06	2.13115e-05
Alyref	21681	46.605	43.9182	52.3515	53.2143	73.504	77.9902	83.7744	87.3521	49.0222	80.6552	-0.718679	7.87325e-15	1.4739e-13
Alyref2	56009	3.27515	2.73365	4.1376	4.68286	2.18647	2.4917	2.38462	2.53512	3.70731	2.39948	0.626314	0.00642719	0.0146856
Amacr	17117	5.11977	6.25862	4.7038	4.78928	3.47263	3.32226	3.20555	3.41146	5.21787	3.35298	0.637532	0.00229448	0.00585891
Ambra1	228361	63.696	63.0898	68.5099	65.7728	55.0476	47.8821	50.8979	46.039	65.2671	49.9667	0.384893	5.6441e-06	2.5855e-05
Amd1	11702	40.7323	39.9257	38.4143	40.5847	47.4593	48.2559	43.0404	57.1497	39.9143	48.9763	-0.295837	0.0020605	0.00532134
Amdhd2	245847	104.955	104.166	97.8651	87.2714	106.687	132.06	145.266	116.302	98.5646	125.079	-0.343198	0.000506132	0.00151104
Amer1	72345	13.6276	14.4596	16.5939	16.3545	9.61404	10.299	9.9294	12.926	15.2589	10.6921	0.510617	0.000319069	0.000996779
Amfr	23802	243.641	237.792	201.958	200.653	264.274	267.608	233.849	284.559	221.011	262.573	-0.248613	0.0128703	0.0270632
Amigo1	229715	5.45858	6.18668	8.84139	9.0819	9.13173	8.34719	8.99119	8.20001	7.39214	8.66753	-0.230928	0.202065	0.287318
Amigo3	320844	4.63038	5.14358	4.52958	4.29262	5.27325	6.97676	5.78563	4.75726	4.64904	5.69823	-0.288897	0.142304	0.21458
Ammecr1	56068	9.56192	8.9563	10.4093	10.8202	8.4565	8.59636	8.24844	9.57712	9.93695	8.7196	0.186661	0.180939	0.262104
Ammecr1l	225339	36.6289	36.4726	36.89	36.3986	50.4818	53.2393	51.2107	46.7902	36.5975	50.4305	-0.461829	2.91595e-08	2.08466e-07
Amn1	232566	11.8206	11.9417	10.7578	12.0264	8.13496	9.71762	10.164	11.3611	11.6366	9.84441	0.242055	0.0828774	0.13557
Amotl1	75723	11.2936	11.4741	13.0225	11.9555	10.3857	6.27077	5.51199	5.10154	11.9364	6.81751	0.80465	5.78864e-05	0.000214967
Amotl2	56332	13.6653	12.0496	6.53305	5.10857	7.81342	3.07309	2.42371	1.65878	9.33913	3.74225	1.31615	0.000570708	0.0016786
Ampd2	109674	33.542	34.1706	30.052	28.5938	31.9289	34.5516	34.0492	31.8924	31.5896	33.1055	-0.0665801	0.494391	0.58891
Ampd3	11717	62.6043	64.6364	93.771	84.0431	34.5655	46.5117	48.1224	33.5512	76.2637	40.6877	0.907296	5.52776e-11	6.25836e-10
Amph	218038	1.05407	0.971165	1.39372	1.20619	2.18647	0.539868	0.977303	0.594657	1.15629	1.07457	0.0927807	0.820116	0.865729
Amt	434437	3.68925	4.24435	3.5714	2.66071	1.96139	1.37043	1.0164	1.18931	3.54143	1.38438	1.34593	1.25573e-06	6.59339e-06
Amz1	231842	18.1074	18.2004	14.4163	12.9843	18.1027	17.3588	16.5751	16.3687	15.9271	17.1013	-0.102085	0.419336	0.517366
Amz2	13929	44.0074	44.7815	38.5885	38.3143	27.3952	29.1113	30.8828	31.2039	41.4229	29.6483	0.482936	1.28329e-07	8.11478e-07
Anapc1	17222	212.207	207.434	218.422	217.54	177.779	205.441	202.771	197.019	213.901	195.753	0.128044	0.154292	0.229677
Anapc10	68999	16.8651	15.9343	17.6828	19.0152	19.1316	19.8921	21.0707	21.9397	17.3744	20.5085	-0.239484	0.0333279	0.0619673
Anapc11	66156	28.5728	31.1132	29.4858	26.5717	23.5689	26.0798	20.367	26.4779	28.9359	24.1234	0.261698	0.0190562	0.0380063
Anapc13	69010	10.3901	10.2512	9.23338	10.5364	10.3857	13.2475	15.5587	13.9275	10.1028	13.2799	-0.391675	0.00658786	0.0150026
Anapc15	75430	16.2252	16.0422	18.6845	19.2281	21.5432	26.1213	29.9055	22.9413	17.545	25.1278	-0.516785	3.58219e-05	0.000139903
Anapc16	52717	32.5256	34.6742	28.9196	30.1902	35.7874	37.5001	31.0782	33.7703	31.5774	34.534	-0.128278	0.190107	0.273345
Anapc2	99152	47.1697	45.6807	49.6512	46.8995	47.5557	45.1413	50.3116	44.0985	47.3503	46.7768	0.0174716	0.846865	0.885918
Anapc4	52206	58.388	58.4497	61.1058	64.6021	58.681	60.3822	58.6382	67.3528	60.6364	61.2635	-0.0152598	0.856317	0.893378
Anapc5	59008	177.046	173.839	201.523	189.727	154.886	184.593	170.442	210.133	185.534	180.013	0.0434109	0.672095	0.748282
Anapc7	56317	38.6242	39.8178	34.1896	36.5405	51.8322	51.9104	56.2145	52.2047	37.293	53.0404	-0.507208	7.64703e-09	6.08895e-08
Ang	11727	17.2039	18.0205	10.6271	11.8136	38.9385	47.01	47.7706	49.1375	14.4163	45.7141	-1.66272	3.17172e-27	1.86934e-25
Angel1	68737	5.91032	4.96373	5.9233	5.88905	3.31186	2.90698	4.26104	3.28626	5.6716	3.44154	0.719936	0.000411111	0.00125472
Angel2	52477	55.5269	57.5865	52.6128	59.1388	40.7712	43.3971	41.6331	48.136	56.2163	43.4844	0.370465	2.04907e-05	8.40228e-05
Angpt2	11601	5.19506	4.67598	7.88321	8.26595	4.66233	3.73755	4.76924	3.66184	6.50505	4.20774	0.626493	0.0032712	0.00805089
Angptl2	26360	9.07253	9.63971	16.9859	16.5319	17.9741	19.4352	19.4679	21.971	13.0575	19.7121	-0.595526	0.00138326	0.00373008
Angptl3	30924	3.2375	3.63288	2.87454	2.87357	3.60125	4.31894	3.75284	2.7542	3.15462	3.60681	-0.187591	0.436433	0.534179
Angptl4	57875	20.592	19.9269	12.4128	13.4809	4.14786	2.82393	2.73645	2.72291	16.6032	3.10779	2.41242	6.05514e-32	5.14394e-30
Angptl6	70726	6.92675	8.59661	3.0052	2.44786	0.836004	0.872095	0.938211	0.970231	5.2441	0.904135	2.53099	7.36232e-12	9.26619e-11
Angptl7	654812	1.01643	0.863258	2.17768	1.77381	1.51124	1.86877	1.75915	1.3771	1.45779	1.62906	-0.162098	0.645417	0.724528
Ank	11732	67.6487	72.5496	84.0586	85.1428	106.076	102.741	100.115	102.876	77.3499	102.952	-0.412823	2.58472e-06	1.27661e-05
Ank2	109676	27.067	28.5594	29.5729	30.6159	22.3149	10.7974	11.2976	8.4191	28.9538	13.2072	1.13055	5.00803e-08	3.40071e-07
Ank3	11735	4.17864	4.46017	3.70206	3.22833	13.1831	3.28074	3.59648	2.19084	3.8923	5.5628	-0.517065	0.191702	0.275316
Ankdd1b	271144	1.54346	1.65458	1.65504	1.98667	1.41478	1.70266	1.4855	1.28321	1.70994	1.47154	0.22307	0.407746	0.506414
Ankfy1	11736	227.566	222.217	279.527	280.439	194.725	230.856	228.963	230.164	252.437	221.177	0.190738	0.0691535	0.116085
Ankhd1	108857	152.84	150.746	148.954	158.685	137.587	156.852	166.337	131.044	152.806	147.955	0.0470747	0.604409	0.688788
Ankib1	70797	133.716	133.805	127.482	133.745	128.584	125.914	124.274	126.224	132.187	126.249	0.0663662	0.376478	0.475783
Ankle1	234396	0.639971	0.755351	2.74388	2.73167	1.28616	2.40864	2.15007	1.84657	1.71772	1.92286	-0.162572	0.700683	0.772765
Ankle2	71782	149.942	145.567	139.589	148.397	112.7	111.919	108.168	117.899	145.874	112.671	0.372512	8.15707e-06	3.61175e-05
Ankmy2	217473	24.8083	22.9842	25.0869	27.2812	15.241	20.4319	18.3342	23.8489	25.0402	19.464	0.363238	0.00447477	0.0106353
Ankra2	68558	20.8555	20.1427	20.7751	22.7757	16.4307	16.902	15.285	18.1214	21.1373	16.6848	0.340486	0.00233174	0.00594296
Ankrd10	102334	33.3538	34.2426	31.3151	32.8155	35.1443	29.6927	24.6671	31.4543	32.9317	30.2396	0.121729	0.249325	0.34128
Ankrd11	77087	239.952	234.914	237.977	234.143	316.234	270.515	321.728	257.549	236.746	291.507	-0.300173	0.00197228	0.00511894
Ankrd12	106585	96.4098	96.7568	86.062	94.8278	126.269	157.849	182.169	128.258	93.5141	148.636	-0.667813	6.13793e-10	5.8204e-09
Ankrd13a	68420	158.223	153.48	146.863	147.545	195.175	215.781	230.487	225.344	151.528	216.697	-0.515955	9.11391e-09	7.15065e-08
Ankrd13b	268445	10.0137	11.0425	13.6323	14.4743	15.8519	12.0017	16.0278	10.9542	12.2907	13.7089	-0.157768	0.330927	0.429498
Ankrd13c	433667	41.9369	39.9257	39.1983	43.9905	43.7294	44.02	42.6104	44.9749	41.2628	43.8337	-0.0869066	0.291247	0.38747
Ankrd13d	68423	13.7406	14.8552	11.6724	10.2881	7.97419	8.34719	6.68475	8.4191	12.6391	7.85631	0.685044	7.7389e-06	3.44517e-05
Ankrd16	320816	32.2997	29.5306	33.0572	35.9374	28.4884	32.0599	29.0454	25.852	32.7062	28.8614	0.181916	0.0674762	0.113828
Ankrd17	81702	159.654	155.674	156.575	159.572	193.02	199.71	221.731	177.74	157.869	198.05	-0.326908	0.000590578	0.00173199
Ankrd23	78321	3.83983	3.84869	4.39892	4.29262	1.54339	2.201	1.9937	1.72138	4.09501	1.86487	1.13989	4.77028e-07	2.71913e-06
Ankrd24	70615	9.33605	9.5318	8.66718	7.34357	3.72986	5.60632	6.05928	4.69466	8.71965	5.02253	0.80027	2.48009e-05	9.98359e-05
Ankrd26	232339	18.258	19.3154	18.4232	22.8112	13.7297	12.2509	17.2005	14.0214	19.7019	14.3006	0.463044	0.000424571	0.00129164
Ankrd27	245886	41.7487	42.5154	44.8167	45.445	30.9964	34.0532	30.0618	33.2695	43.6315	32.0953	0.442969	1.61329e-07	1.00315e-06
Ankrd28	105522	87.5631	81.2541	90.7223	93.5507	130.352	121.886	115.283	143.845	88.2726	127.841	-0.53485	1.433e-09	1.27818e-08
Ankrd32	105377	16.0369	14.8912	16.9859	15.8933	16.3342	15.5731	14.1513	19.4359	15.9518	16.3736	-0.0406021	0.748709	0.810635
Ankrd33b	67434	29.2881	29.027	16.7246	16.39	47.9737	44.6014	42.024	40.5932	22.8574	43.7981	-0.93722	1.11552e-08	8.60963e-08
Ankrd37	654824	4.29157	3.92063	6.22817	6.88238	5.40187	6.35383	6.80203	7.41757	5.33069	6.49382	-0.285708	0.178955	0.259643
Ankrd39	109346	6.17384	6.40249	6.18462	5.3569	5.30541	4.65117	3.90921	5.6336	6.02946	4.87485	0.301843	0.112139	0.175496
Ankrd40	71452	98.0662	101.253	97.4731	103.342	97.3944	92.3174	96.8312	96.8353	100.034	95.8446	0.0616799	0.420305	0.51825
Ankrd42	73845	2.37166	1.90636	2.87454	2.02214	1.09324	1.12126	1.64187	0.813742	2.29368	1.16753	0.976632	0.000887106	0.00249904
Ankrd44	329154	104.654	100.354	89.677	94.9343	81.6068	79.6928	79.787	77.2116	97.4048	79.5746	0.291964	0.000482494	0.00144623
Ankrd46	68839	22.926	23.1641	24.1723	25.259	17.331	18.9784	17.5524	17.8084	23.8804	17.9176	0.415117	9.38005e-05	0.00033269
Ankrd49	56503	20.8932	19.6031	22.9528	27.8133	22.2827	28.1147	27.4427	26.2588	22.8156	26.0247	-0.188562	0.131138	0.200342
Ankrd50	99696	59.5173	57.4426	68.2921	66.9081	54.3402	46.927	48.2788	45.7886	63.04	48.8337	0.367641	5.57497e-05	0.000207847
Ankrd52	237615	65.3147	68.9167	87.8042	81.7016	96.5906	98.0068	97.9258	86.3192	75.9343	94.7106	-0.318921	0.00318511	0.00787676
Ankrd54	223690	8.65844	8.30886	10.3658	8.69166	10.6108	10.3405	9.57757	10.5473	9.00618	10.2691	-0.19214	0.180514	0.261566
Ankrd55	77318	1.88227	1.25892	2.00347	2.12857	0.353694	0.332226	0.273645	0.56336	1.81831	0.380731	2.21954	2.43663e-10	2.47033e-09
Ankrd61	66729	1.91991	2.62574	2.09058	2.41238	1.76847	2.32559	1.52459	1.3458	2.26215	1.74111	0.385104	0.170953	0.250154
Ankrd9	74251	1.9952	2.69768	2.39545	2.30595	3.50478	2.36711	2.81463	1.72138	2.34857	2.60198	-0.147268	0.589546	0.677049
Anks1	224650	58.4633	63.953	75.7398	69.6397	53.9865	59.5101	56.5663	53.6757	66.949	55.9346	0.259357	0.00487929	0.011482
Anks1b	77531	3.6516	3.56094	6.18462	6.1019	11.9934	3.94519	3.08828	2.53512	4.87477	5.39051	-0.148459	0.682449	0.757606
Anks3	72615	34.6714	31.5089	34.2767	32.9219	35.9803	33.9286	36.3166	33.3321	33.3447	34.8894	-0.0656249	0.463417	0.559479
Anks6	75691	13.5147	13.8481	16.2891	12.5586	10.6108	9.6761	10.9849	8.4504	14.0526	9.93055	0.500234	0.000355499	0.00110026
Ankzf1	52231	34.6714	33.0915	32.2297	29.729	18.4564	18.0648	20.8361	17.0573	32.4304	18.6036	0.802612	2.9404e-14	5.05864e-13
Anln	68743	12.8371	12.841	19.8169	19.9021	24.5656	28.613	27.2863	33.2069	16.3493	28.418	-0.798607	4.80492e-07	2.73634e-06
Ano10	102566	40.2429	38.7747	34.8865	36.2921	33.3115	35.0084	34.6747	36.2428	37.549	34.8094	0.109812	0.198078	0.282552
Ano3	228432	1.12936	1.11504	2.78743	2.3769	0.514464	0.373755	0.117276	0.156489	1.85219	0.290496	2.64378	5.49029e-09	4.47581e-08
Ano6	105722	160.03	158.839	150.347	143.359	139.838	138.746	158.949	144.596	153.144	145.532	0.0736348	0.390301	0.489186
Ano8	382014	19.1991	21.6534	23.4319	24.2302	17.2988	16.819	15.9887	15.5863	22.1287	16.4232	0.429995	0.000155002	0.000521242
Anp32a	11737	73.672	71.5785	88.4575	91.635	89.2595	104.195	128.613	112.547	81.3357	108.653	-0.417672	0.000156131	0.000524611
Anp32b	67628	9.33605	10.0713	10.7142	9.11738	13.4404	13.1645	22.1261	12.1748	9.80974	15.2265	-0.633038	0.000168926	0.000563453
Anp32e	66471	31.1704	30.6816	35.0171	35.0505	47.8773	50.623	60.2801	56.023	32.9799	53.7008	-0.703457	1.88948e-12	2.56329e-11
Anpep	16790	189.13	189.053	99.7814	92.0962	48.8097	53.613	56.4881	43.9734	142.515	50.7211	1.4908	4.18984e-15	8.10211e-14
Antxr1	69538	4.93154	4.5321	4.09404	2.87357	3.34401	0.913623	1.40732	0.406871	4.10782	1.51796	1.42854	0.000920355	0.00258009
Antxr2	71914	252.977	252.935	197.211	201.185	96.3655	73.7958	75.7996	88.291	226.077	83.563	1.43523	7.18321e-40	1.04097e-37
Anxa1	16952	172.566	170.134	216.244	227.757	91.671	104.485	97.4567	159.65	196.675	113.316	0.795083	6.4191e-08	4.26716e-07
Anxa11	11744	16.6016	18.8118	19.0765	16.5674	20.8036	20.515	20.2497	20.9695	17.7643	20.6345	-0.217122	0.049878	0.0879595
Anxa2	12306	173.056	166.213	253.787	258.054	203.052	211.047	220.792	266.313	212.777	225.301	-0.0826805	0.550041	0.640831
Anxa3	11745	339.9	338.037	351.696	373.99	387.809	456.313	440.959	480.984	350.906	441.516	-0.331351	0.000643784	0.00187252
Anxa4	11746	296.231	287.393	267.811	284.874	170.352	212.459	212.153	205.814	284.077	200.194	0.505109	2.83834e-07	1.69229e-06
Anxa5	11747	484.647	486.518	785.882	782.001	521.184	587.709	629.188	576.912	634.762	578.748	0.133266	0.361335	0.461022
Anxa6	11749	156.115	160.206	113.849	113.027	151.284	166.778	169.855	183.217	135.799	167.784	-0.304931	0.00697161	0.0157485
Anxa7	11750	183.672	189.629	193.901	192.849	161.735	175.166	178.846	184.469	190.013	175.054	0.118298	0.184575	0.266697
Anxa9	71790	5.19506	4.64001	5.44421	5.25047	4.37294	3.19768	4.22195	4.1939	5.13244	3.99662	0.356366	0.0813015	0.133342
Aoah	27052	80.5611	77.8371	23.2577	20.9664	79.3239	102.741	103.164	105.974	50.6556	97.8008	-0.948799	0.00182006	0.00475593
Aoc2	237940	2.86105	2.62574	2.48256	3.01548	1.89708	2.32559	1.75915	1.47099	2.74621	1.8632	0.566524	0.0233423	0.0455098
Ap1ar	211556	21.5708	21.4016	24.8691	28.2036	20.0962	22.1346	22.3998	25.3199	24.0113	22.4876	0.0942021	0.419039	0.517104
Ap1b1	11764	224.668	226.785	225.521	219.065	203.342	239.951	227.438	244.436	224.01	228.791	-0.0304126	0.735118	0.800352
Ap1g1	11765	147.08	145.243	139.764	153.967	142.314	154.61	155.43	150.386	146.513	150.685	-0.0401891	0.624654	0.706629
Ap1g2	11766	17.8439	18.9197	21.3413	21.9598	17.1381	23.7957	24.8235	20.6252	20.0162	21.5956	-0.107741	0.408207	0.506731
Ap1m1	11767	32.0362	32.4081	33.1879	30.8288	38.5848	39.7841	42.5713	39.9985	32.1153	40.2347	-0.325157	0.000524053	0.00155774
Ap1s1	11769	32.1868	29.7824	43.2488	38.9528	34.9835	35.7559	37.1375	39.0909	36.0427	36.742	-0.0290366	0.790192	0.842151
Ap1s2	108012	80.2599	76.2904	85.191	99.085	88.5842	100.083	98.0821	101.217	85.2066	96.9916	-0.186642	0.044612	0.0798388
Ap1s3	252903	0.338808	0.251784	0.348429	0.674047	0.739542	1.86877	1.25095	1.4397	0.403267	1.32474	-1.69094	6.30731e-05	0.000232198
Ap2a1	11771	92.7958	94.7066	84.4506	78.5088	96.8156	108.098	107.621	98.6818	87.6154	102.804	-0.230162	0.00890846	0.0195153
Ap2a2	11772	185.065	186.356	160.974	159.394	195.143	280.648	265.123	276.484	172.947	254.35	-0.556268	9.52176e-07	5.13075e-06
Ap2b1	71770	224.705	228.583	259.885	250.036	220.737	255.69	238.814	247.878	240.802	240.78	0.000141002	0.998789	0.998996
Ap2m1	11773	195.53	191.895	205.094	202.463	233.631	287.667	294.559	293.542	198.745	277.35	-0.480708	5.76983e-07	3.24385e-06
Ap2s1	232910	105.445	111.36	120.905	111.856	135.24	166.944	155.157	163.719	112.392	155.265	-0.466175	8.02313e-08	5.22352e-07
Ap3b1	11774	152.501	149.308	150.129	152.441	146.461	165.034	180.449	159.587	151.095	162.883	-0.108088	0.210762	0.297965
Ap3b2	11775	0.414099	0.503567	1.7857	1.91571	1.76847	0.415283	0.74275	0.406871	1.15477	0.833343	0.456583	0.366859	0.46621
Ap3d1	11776	287.347	287.789	300.041	284.874	269.354	315.324	322.627	289.097	290.013	299.101	-0.0443968	0.634175	0.714709
Ap3m1	55946	69.4934	68.0175	77.6562	83.9366	75.2725	87.9154	82.6798	98.5879	74.7759	86.1139	-0.203815	0.0361959	0.0665961
Ap3m2	64933	25.2977	25.61	24.6078	25.5783	15.9805	15.6977	16.5751	15.8054	25.2735	16.0147	0.658538	6.85707e-11	7.69968e-10
Ap3s1	11777	62.1149	66.4349	55.3132	59.8128	67.8127	80.6065	83.1099	85.0673	60.9189	79.1491	-0.376943	5.03775e-05	0.000189887
Ap3s2	11778	27.7823	26.9049	31.0102	33.7733	24.3084	29.9004	27.599	29.8581	29.8677	27.9165	0.0979686	0.351534	0.451016
Ap4b1	67489	20.7802	22.6965	18.0748	19.4409	16.6236	18.9369	17.0833	20.5313	20.2481	18.2938	0.146986	0.230254	0.32041
Ap4e1	108011	34.6337	35.0698	37.3255	43.0681	31.9611	38.4137	34.7138	31.2665	37.5243	34.0888	0.140178	0.173295	0.25277
Ap4m1	11781	20.8179	22.1569	21.2977	19.5474	14.0513	12.2509	13.8777	11.7993	20.955	12.9948	0.689025	1.70013e-08	1.26845e-07
Ap4s1	11782	10.089	9.45987	8.71073	9.54309	10.643	10.7974	8.09207	12.1435	9.45066	10.419	-0.142128	0.328884	0.427341
Ap5b1	381201	38.0218	42.1198	41.5066	35.76	32.7971	29.6927	27.3645	31.2978	39.3521	30.288	0.375904	4.35071e-05	0.000166435
Ap5m1	74385	38.5112	37.1201	39.6774	38.6336	24.3084	26.7858	23.5725	23.6298	38.4856	24.5741	0.647853	9.92887e-13	1.3914e-11
Ap5s1	69596	16.3381	15.7185	13.8065	12.4521	13.6333	16.6944	15.4414	15.4924	14.5788	15.3154	-0.0696117	0.592493	0.679483
Ap5z1	231855	43.518	43.8823	42.2471	36.1857	24.9193	30.1911	30.4528	26.4466	41.4583	28.0024	0.567626	9.49906e-09	7.41035e-08
Apaf1	11783	117.454	122.655	136.018	143.856	91.6067	106.562	99.5676	109.135	129.996	101.718	0.353933	8.5992e-05	0.000306851
Apba1	319924	15.284	15.9343	11.3675	12.8779	15.7555	13.206	14.5814	11.9557	13.8659	13.8746	0.000601138	0.996676	0.997729
Apba2	11784	0.639971	0.575505	2.39545	1.98667	4.50156	1.12126	0.820935	0.594657	1.3994	1.7596	-0.337968	0.532581	0.62486
Apba3	57267	27.6693	27.1926	27.3953	22.0307	24.5335	23.7957	22.9471	24.381	26.072	23.9143	0.123393	0.24298	0.334417
Apbb1	11785	3.12457	2.73365	4.09404	3.61857	8.0385	2.4917	1.91551	2.34733	3.39271	3.69826	-0.130252	0.715245	0.784261
Apbb1ip	54519	32.6385	33.1635	57.6215	61.8705	40.3532	43.5217	46.1287	34.9909	46.3235	41.2486	0.167503	0.33633	0.435043
Apbb2	11787	178.552	181.536	251.958	253.797	169.162	137.916	138.425	119.651	216.461	141.289	0.615319	2.71569e-06	1.33701e-05
Apbb3	225372	23.3778	22.3728	26.35	24.1948	23.7296	14.8671	15.4414	13.458	24.0738	16.874	0.510518	0.000537837	0.00159563
Apc	11789	157.584	156.07	152.438	161.168	153.117	142.982	153.593	143.219	156.815	148.228	0.0813076	0.302212	0.399641
Apc-ps1	79189	0.752907	1.15101	0.871073	1.09976	1.63985	1.24585	1.25095	1.15802	0.968688	1.32367	-0.446756	0.165671	0.243729
Apc2	23805	5.53387	5.79102	11.1497	9.93333	5.75556	3.48838	3.04919	2.62901	8.10199	3.73053	1.11424	3.43437e-05	0.000134514
Apeh	235606	33.2785	33.5232	37.8917	32.709	31.8324	36.3788	33.111	33.3008	34.3506	33.6558	0.0293828	0.755661	0.815653
Apex1	11792	10.616	11.5101	12.7177	13.1617	13.2474	12.417	17.2396	15.7115	12.0014	14.6539	-0.288649	0.0381218	0.0696403
Apex2	77622	7.83024	7.66141	9.58181	9.43666	9.61404	10.7974	11.2585	9.54582	8.62753	10.3039	-0.255377	0.103163	0.163653
Aph1a	226548	42.991	41.832	43.6408	41.3652	44.3403	43.6878	40.4213	43.1283	42.4573	42.8944	-0.0154128	0.849462	0.888147
Aph1b	208117	11.8206	11.2943	11.1497	9.40119	4.30863	6.35383	4.02649	5.69619	10.9165	5.09629	1.09931	8.93428e-09	7.02762e-08
Aph1c	68318	103.562	103.123	48.9108	49.844	33.5688	56.1047	49.8425	49.7008	76.3601	47.3042	0.691377	0.00114368	0.0031432
Api5	11800	184.312	173.874	181.401	192.529	213.406	228.323	214.459	233.262	183.029	222.363	-0.280821	0.00132241	0.00358482
Apip	56369	17.9568	16.6896	13.6323	15.3967	16.3664	18.4386	19.6633	20.1558	15.9189	18.656	-0.227376	0.0728653	0.121357
Apitd1	69928	1.31759	1.58264	1.74215	1.6319	2.12216	1.95183	2.4628	2.7542	1.56857	2.32275	-0.56985	0.0273358	0.0521543
Aplf	72103	5.49622	7.62544	8.31875	8.40785	4.69448	4.31894	4.4565	5.22673	7.46207	4.67416	0.671332	0.000363716	0.00112315
Aplp1	11803	15.397	16.0782	7.05569	6.42119	28.392	8.76247	7.89661	6.9481	11.238	12.9998	-0.210683	0.565782	0.655133
Aplp2	11804	834.372	847.503	519.073	508.906	465.879	596.679	607.531	545.802	677.463	553.973	0.290398	0.0562397	0.0975307
Apmap	71881	25.5236	27.4804	23.7803	24.4076	33.5688	40.2409	37.9585	43.6291	25.298	38.8493	-0.618127	1.26525e-09	1.14262e-08
Apoa1bp	246703	46.0026	52.5868	43.5972	42.6778	44.8548	54.942	56.4881	57.6192	46.2161	53.476	-0.209733	0.0343905	0.0636451
Apobec1	11810	516.118	509.682	587.06	577.41	363.533	358.223	354.214	360.519	547.567	359.122	0.608508	1.08988e-10	1.17868e-09
Apobec3	80287	33.542	34.4943	50.1738	49.2409	44.5976	54.9004	61.8828	52.6741	41.8628	53.5137	-0.354212	0.00709516	0.0159807
Apobr	171504	50.9342	49.3855	87.3251	87.165	50.9641	47.716	61.6092	44.1611	68.7024	51.1126	0.426593	0.00763218	0.0170406
Apoc1	11812	74.1614	73.1251	33.4492	32.1414	107.234	53.53	62.9383	47.51	53.2193	67.803	-0.349348	0.166754	0.244999
Apoc2	11813	36.5537	38.8826	23.911	20.7181	62.9896	57.226	68.4112	63.4719	30.0163	63.0247	-1.06958	2.85911e-12	3.78287e-11
Apoc4	11425	1.39288	1.72652	0.217768	0.141905	2.05785	2.201	1.83733	1.62748	0.869767	1.93092	-1.13923	0.0295265	0.0558089
Apod	11815	16.8651	18.5241	10.7142	11.6362	31.4466	4.65117	5.00379	5.97787	14.4349	11.7699	0.293038	0.503153	0.596692
Apoe	11816	21552	22845.8	18738.1	16715.7	26389.2	18757.8	23307.2	18731	19962.9	21796.3	-0.12676	0.319608	0.417978
Apom	55938	1.16701	1.25892	1.39372	1.34809	1.38262	1.32891	2.07188	1.09542	1.29193	1.46971	-0.180683	0.566166	0.655516
Apoo	68316	3.91512	2.84156	3.52785	4.36357	3.40832	4.73423	4.26104	3.91222	3.66202	4.07895	-0.151375	0.496142	0.590474
Apool	68117	16.6393	16.5458	17.6392	18.1993	14.3085	18.2725	16.6923	22.0649	17.2559	17.8346	-0.0481878	0.715115	0.784188
Apopt1	68020	14.3429	16.1141	16.1149	14.7581	12.9581	14.3688	14.6986	17.7458	15.3325	14.9428	0.0357122	0.77999	0.834093
App	11820	543.976	542.486	619.333	599.654	626.038	651.953	721.054	626.456	576.362	656.375	-0.187535	0.0500235	0.0881908
Appbp2	66884	83.8362	85.2107	85.1474	86.9521	119.581	119.975	114.462	125.567	85.2866	119.896	-0.491519	2.0308e-10	2.08636e-09
Appl1	72993	73.1826	72.8014	83.7537	88.655	99.3558	106.146	111.1	104.253	79.5982	105.214	-0.402396	6.83316e-06	3.07642e-05
Appl2	216190	91.0642	90.0666	73.0395	75.4578	51.157	61.8772	65.3229	55.3344	82.407	58.4229	0.497373	9.05965e-07	4.90535e-06
Aprt	11821	87.7137	95.6777	95.6438	87.4133	61.5106	61.4619	55.2372	67.4154	91.6121	61.4063	0.57633	2.66157e-11	3.14034e-10
Aptx	66408	17.8816	16.8695	18.5539	17.9509	17.0095	18.5216	17.6696	17.4642	17.814	17.6662	0.0123012	0.908365	0.931971
Aqr	11834	82.1422	81.5779	92.6386	90.1095	65.8192	70.8058	77.0115	73.2055	86.617	71.7105	0.272471	0.00146997	0.00393548
Araf	11836	67.3099	66.0752	67.8131	60.8416	44.5976	53.3639	51.2889	44.9436	65.51	48.5485	0.433337	1.15057e-06	6.08531e-06
Arap1	69710	374.12	381.74	445.38	421.457	297.714	294.311	329.468	249.036	405.674	292.632	0.471298	6.95027e-06	3.1223e-05
Arap2	212285	139.551	134.884	111.062	128.424	175.561	181.852	180.136	187.567	128.48	181.279	-0.496343	2.8262e-08	2.02402e-07
Arap3	106952	128.935	129.489	209.624	196.574	127.298	122.924	123.687	110.919	166.155	121.207	0.454914	0.000745951	0.00213938
Arc	11838	2.4093	3.09334	0.783966	0.603095	6.33433	2.201	2.30644	2.28474	1.72243	3.28163	-0.927692	0.0397933	0.0723397
Arcn1	213827	220.301	213.908	199.04	213.744	255.624	264.743	270.947	281.429	211.748	268.186	-0.340807	0.000140423	0.0004773
Arel1	68497	96.8992	99.5624	96.994	95.3245	71.6712	69.4769	73.3759	69.3245	97.195	70.9621	0.453865	9.35158e-09	7.30919e-08
Arf1	11840	268.562	264.049	252.045	253.3	297.842	321.221	318.562	334.73	259.489	318.089	-0.293716	0.000947259	0.00264888
Arf2	11841	69.2675	67.406	65.5047	65.8438	166.043	138.04	126.268	156.99	67.0055	146.835	-1.13222	1.27976e-34	1.31367e-32
Arf3	11842	127.994	137.222	153.091	140.84	157.297	158.223	154.179	150.073	139.787	154.943	-0.148657	0.0749606	0.124459
Arf4	11843	114.593	117.079	102.395	99.759	167.49	186.628	173.804	185.22	108.456	178.286	-0.71685	8.9946e-17	2.05939e-15
Arf5	11844	50.7836	55.4643	50.0432	46.0126	58.5846	59.4685	57.1527	66.7581	50.5759	60.491	-0.258716	0.00386156	0.00933046
Arf6	11845	270.971	266.603	335.537	354.833	329.803	337.916	345.731	358.109	306.986	342.89	-0.159624	0.142285	0.214577
Arfgap1	228998	69.7945	70.8591	69.1197	67.724	68.7774	73.3805	75.3696	67.7284	69.3743	71.314	-0.039184	0.622712	0.704951
Arfgap2	77038	36.4784	36.3288	31.62	32.8155	38.0382	40.1994	37.2548	39.3413	34.3106	38.7084	-0.173242	0.0520361	0.091126
Arfgap3	66251	46.1909	47.2993	33.0572	34.5893	41.8002	48.4635	48.396	50.1077	40.2842	47.1919	-0.227367	0.0501894	0.088458
Arfgef1	211673	159.955	156.537	140.591	145.381	137.265	130.233	122.906	131.513	150.616	130.479	0.207012	0.0146753	0.0303611
Arfgef2	99371	161.574	165.602	129.877	122.606	191.67	247.301	247.649	213.044	144.915	224.916	-0.633848	3.1434e-08	2.22148e-07
Arfip1	99889	54.3223	56.7952	54.9212	60.6643	55.7872	57.3921	61.2574	63.6909	56.6757	59.5319	-0.0707926	0.410874	0.509339
Arfip2	76932	32.7891	32.8398	26.6984	26.749	23.3116	20.9303	22.5562	19.5611	29.7691	21.5898	0.464059	5.34423e-05	0.000200335
Arfrp1	76688	24.6954	23.8835	22.6479	22.8821	25.8518	24.8755	25.4099	23.0977	23.5272	24.8087	-0.0758641	0.461229	0.557494
Arg1	11846	0.97878	0.719381	1.35016	1.38357	2.47586	2.65781	2.30644	4.1313	1.10797	2.89285	-1.38881	6.35171e-06	2.87754e-05
Arg2	11847	7.49143	8.34482	3.0052	4.93119	5.27325	3.57143	3.75284	3.38016	5.94316	3.99442	0.573775	0.0426044	0.0767366
Arglu1	234023	42.7275	42.3356	46.1233	49.5957	56.2052	52.9486	62.0783	52.8932	45.1955	56.0313	-0.309796	0.00053841	0.00159695
Arhgap1	228359	96.1839	94.3469	110.713	94.2957	109.388	132.641	130.529	133.422	98.885	126.495	-0.355423	7.17092e-05	0.000261026
Arhgap10	78514	92.2312	93.088	103.135	106.712	53.8258	67.8157	69.3885	55.71	98.7916	61.685	0.680569	2.19035e-12	2.93907e-11
Arhgap11a	228482	23.6413	21.4016	27.1775	27.4231	22.5078	23.0482	28.4982	25.1321	24.9109	24.7966	0.00645595	0.957751	0.968992
Arhgap12	75415	157.922	152.689	130.356	146.481	127.587	144.809	151.404	145.566	146.862	142.341	0.045543	0.604228	0.688769
Arhgap15	76117	23.0013	21.5814	14.7211	15.1129	29.2923	32.8904	30.6091	38.8405	18.6042	32.9081	-0.822041	4.38502e-08	3.01421e-07
Arhgap17	70497	54.8117	54.4931	66.4193	68.7883	64.5009	66.2377	63.7983	58.7146	61.1281	63.3129	-0.0505885	0.61402	0.697547
Arhgap18	73910	178.966	175.601	192.507	205.797	134.532	147.259	147.143	170.135	188.218	149.767	0.329549	0.000423554	0.00128887
Arhgap19	71085	286.632	289.119	224.998	220.343	154.918	263.248	256.835	226.909	255.273	225.477	0.179304	0.211257	0.298562
Arhgap20	244867	1.09172	0.899227	2.65677	2.55428	2.57232	0.705981	0.899119	0.28168	1.8005	1.11477	0.681565	0.16928	0.248178
Arhgap21	71435	64.75	63.5933	65.8096	63.4669	76.5908	73.2144	78.2233	76.8047	64.405	76.2083	-0.24304	0.00394566	0.00950569
Arhgap22	239027	31.1704	30.9334	40.1129	38.8819	36.5269	26.8273	29.71	25.9458	35.2746	29.7525	0.244236	0.0378987	0.0692981
Arhgap23	58996	25.5612	28.3436	20.7751	18.1993	84.2113	79.153	82.9144	78.3696	23.2198	81.1621	-1.8047	6.47673e-49	1.62817e-46
Arhgap24	231532	26.2388	26.4013	18.641	18.6605	23.9547	17.8572	16.966	17.6832	22.4854	19.1153	0.233745	0.121018	0.187227
Arhgap25	232201	175.239	175.277	280.355	264.759	220.351	287.542	310.391	232.949	223.908	262.808	-0.231071	0.123574	0.190415
Arhgap26	71302	3.83983	4.06451	3.61495	3.01548	4.24433	5.44021	5.39471	4.72596	3.63369	4.9513	-0.443513	0.0401268	0.0728814
Arhgap27	544817	30.9068	31.8686	46.5153	43.1036	42.1217	30.9386	33.8929	30.5466	38.0986	34.3749	0.147073	0.269896	0.364197
Arhgap29	214137	10.0513	9.78359	10.932	10.7493	9.16388	3.90366	4.02649	4.85115	10.379	5.4863	0.913651	0.000110101	0.000384527
Arhgap30	226652	245.485	239.518	273.169	277.637	249.451	254.693	288.578	247.471	258.952	260.048	-0.00604386	0.949608	0.963126
Arhgap31	12549	185.065	188.73	130.313	129.772	366.298	399.087	426.651	389.563	158.47	395.4	-1.31889	4.72098e-25	2.29854e-23
Arhgap32	330914	16.7145	17.8047	16.2455	17.9509	36.0768	22.0515	20.9143	22.7222	17.1789	25.4412	-0.567481	0.000226139	0.000731325
Arhgap33	233071	1.12936	0.899227	2.52611	2.73167	1.96139	1.86877	1.32913	1.18931	1.82159	1.58715	0.196528	0.603182	0.688065
Arhgap39	223666	52.7412	56.2916	51.2191	43.6002	53.0862	43.314	47.0669	45.5069	50.963	47.2435	0.108529	0.259363	0.352435
Arhgap4	171207	26.9541	29.1349	34.3203	32.5317	37.0414	37.4585	41.1249	41.5008	30.7352	39.2814	-0.354827	0.000380923	0.00117042
Arhgap5	11855	115.609	116.072	113.501	128.601	94.4362	76.8274	71.304	85.2864	118.446	81.9635	0.530498	1.39381e-08	1.06047e-07
Arhgap6	11856	14.7193	15.1789	14.1114	14.3679	4.85525	6.10466	5.62927	6.25955	14.5944	5.71218	1.35403	5.92276e-19	1.70859e-17
Arhgap9	216445	78.98	79.7075	79.529	77.1252	52.7325	57.7244	48.357	56.8054	78.8354	53.9048	0.548237	9.19152e-11	1.01e-09
Arhgdia	192662	427.576	420.478	473.82	412.091	479.512	540.574	577.352	533.94	433.492	532.844	-0.297719	0.00210319	0.00542331
Arhgdib	11857	212.47	216.894	264.501	265.326	245.463	321.969	346.669	336.545	239.798	312.662	-0.382753	0.00117776	0.00323038
Arhgef1	16801	60.9855	62.2625	71.036	60.9836	72.7002	71.927	76.1905	63.2841	63.8169	71.0255	-0.154486	0.0983418	0.157056
Arhgef10	234094	6.70088	6.29459	3.52785	3.65405	10.8037	4.1113	5.04288	4.72596	5.04434	6.17097	-0.292166	0.326635	0.425091
Arhgef10l	72754	20.065	21.3297	27.7872	25.0462	49.9351	41.9021	38.4276	40.3428	23.557	42.6519	-0.857943	1.99247e-12	2.68754e-11
Arhgef11	213498	104.692	101.001	105.879	103.732	83.6968	83.8457	91.6319	78.62	103.826	84.4486	0.298313	0.000225667	0.000730172
Arhgef12	69632	138.836	144.991	121.384	127.005	114.983	88.4553	84.8299	81.7811	133.054	92.5122	0.524089	3.88683e-07	2.25521e-06
Arhgef17	207212	7.41614	6.87009	3.96338	4.29262	4.34079	2.28406	2.73645	1.59619	5.63556	2.73937	1.03892	0.0006555	0.00190256
Arhgef18	102098	39.4147	38.9905	44.2505	43.1036	25.5946	25.5814	25.2144	27.1039	41.4398	25.8736	0.678319	4.77462e-15	9.14677e-14
Arhgef2	16800	211.68	219.16	233.796	230.843	278.775	278.78	267.781	248.661	223.87	268.499	-0.26223	0.00398934	0.0096053
Arhgef25	52666	4.02805	3.74078	4.57313	3.8669	1.70416	1.12126	1.13367	1.09542	4.05222	1.26363	1.6698	1.99601e-10	2.06266e-09
Arhgef26	622434	1.6564	2.51784	6.09751	5.25047	4.08356	3.48838	2.89282	1.81527	3.88055	3.07001	0.336228	0.331915	0.430417
Arhgef3	71704	109.774	107.979	77.1335	78.225	127.33	161.504	174.781	189.664	93.2779	163.32	-0.807804	5.94616e-10	5.66471e-09
Arhgef39	230098	2.0705	2.26605	6.05396	4.57643	3.27971	3.36379	4.14376	4.28779	3.74173	3.76876	-0.0151097	0.959522	0.970318
Arhgef4	226970	10.9172	12.6251	12.3692	11.6362	15.8841	21.5947	22.2434	21.5642	11.8869	20.3216	-0.772476	2.35837e-08	1.71591e-07
Arhgef40	268739	22.1355	24.2432	23.911	24.5495	28.8743	14.9087	16.6923	15.868	23.7098	19.0858	0.310941	0.0580111	0.100151
Arhgef5	54324	5.27035	5.32342	6.4895	6.45666	4.56587	4.36047	5.78563	4.91375	5.88498	4.90643	0.261665	0.19279	0.276491
Arhgef6	73341	154.534	152.041	149.258	153.009	121.51	165.656	166.102	183.687	152.211	159.239	-0.0649778	0.537864	0.629672
Arhgef7	54126	87.8267	86.1819	134.842	127.218	129.098	183.97	176.892	164.188	109.017	163.537	-0.585078	8.39027e-05	0.000300615
Arhgef9	236915	1.58111	1.87039	3.44074	3.47667	2.4437	1.03821	1.29004	0.813742	2.59223	1.39642	0.882924	0.0116799	0.0248658
Arid1a	93760	93.3982	96.577	104.006	102.029	101.124	103.489	105.822	87.8215	99.0027	99.5642	-0.00789244	0.933728	0.950708
Arid1b	239985	94.0758	96.505	102.7	94.544	79.6776	83.9287	80.4125	73.0803	96.9561	79.2748	0.290709	0.000520095	0.00154785
Arid2	77044	93.9628	90.1385	95.6438	102.633	92.6999	98.5882	98.5512	91.2017	95.5944	95.2603	0.00542576	0.948359	0.962264
Arid3a	13496	110.903	111.756	68.3793	63.5024	193.053	190.49	184.163	208.537	88.6352	194.061	-1.13033	1.24244e-14	2.26395e-13
Arid3b	56380	13.8535	13.6323	15.9406	17.6671	14.9194	14.8671	13.6432	11.2046	15.2734	13.6586	0.162392	0.248982	0.341001
Arid4a	238247	76.7589	78.7723	78.0917	85.1428	82.4428	72.5915	79.6307	74.9581	79.6914	77.4058	0.0418962	0.604084	0.688769
Arid4b	94246	69.3804	67.5499	64.9385	70.9878	96.4619	82.3091	91.2019	76.2101	68.2142	86.5458	-0.343125	0.000151183	0.000510351
Arid5a	214855	19.0109	18.0565	11.8901	9.47214	29.7424	16.2376	17.2005	14.2092	14.6074	19.3474	-0.405751	0.0714794	0.119436
Arid5b	71371	60.3455	62.3344	51.7853	54.0302	80.4814	91.4038	94.2511	82.1253	57.1239	87.0654	-0.606987	9.27852e-11	1.01865e-09
Arih1	23806	186.947	181.248	162.499	175.501	224.949	245.432	234.67	235.046	176.549	235.024	-0.412533	7.33722e-06	3.28296e-05
Arih2	23807	93.624	97.4402	77.6126	77.48	122.057	124.502	115.361	114.988	86.5392	119.227	-0.461877	4.96547e-07	2.81865e-06
Arl1	104303	107.478	106.828	80.6178	90.4997	115.786	119.311	128.379	123.344	96.3558	121.705	-0.336435	0.000405124	0.0012386
Arl10	56795	13.3641	14.7114	13.2839	12.665	12.4436	9.84221	9.81212	9.17024	13.5061	10.317	0.387314	0.00462907	0.0109677
Arl11	219144	55.9787	56.6153	70.3827	63.7862	31.2858	38.6213	34.9874	42.9718	61.6907	36.9666	0.7382	9.29373e-12	1.16112e-10
Arl13b	68146	25.7118	24.8187	21.8204	25.3655	32.7328	25.2907	29.5536	34.1459	24.4291	30.4307	-0.31786	0.00477777	0.0112744
Arl14ep	212772	84.1751	84.3115	85.8878	89.7547	80.61	76.246	73.4932	75.3963	86.0323	76.4364	0.170433	0.0281438	0.0535489
Arl15	218639	14.7946	15.8983	10.8884	11.9909	23.3438	24.7509	24.5499	26.4466	13.3931	24.7728	-0.885405	5.32059e-11	6.04046e-10
Arl16	70317	6.28678	6.00684	7.09925	6.74047	5.98064	6.02161	6.80203	7.51146	6.53333	6.57893	-0.0125964	0.939564	0.95515
Arl2	56327	24.8836	25.0345	18.9458	16.3545	17.4918	20.598	19.7806	20.0306	21.3046	19.4752	0.130504	0.348857	0.448327
Arl2bp	107566	29.2505	30.6816	28.0486	26.0395	47.9416	48.1728	47.2624	57.2749	28.505	50.1629	-0.816047	4.05245e-18	1.06209e-16
Arl3	56350	12.4983	9.8915	11.8901	11.3524	9.96773	9.42693	13.3695	11.5489	11.4081	11.0783	0.0415756	0.773637	0.829099
Arl4a	11861	11.2183	11.1864	7.88321	10.0043	14.405	8.804	9.49939	13.3954	10.073	11.526	-0.196256	0.277702	0.372629
Arl4c	320982	436.724	442.276	384.71	390.415	672.083	662.875	665.113	657.754	413.531	664.456	-0.684131	5.48292e-13	7.96446e-12
Arl4d	80981	2.52224	2.37396	2.43901	2.16405	3.6334	3.32226	3.55738	3.38016	2.37481	3.4733	-0.548977	0.0190461	0.0379934
Arl5a	75423	118.884	116.216	93.1613	98.8012	106.848	112.209	99.1767	107.101	106.766	106.334	0.0061674	0.94687	0.960991
Arl5b	75869	48.7131	47.6231	36.9335	40.0171	93.0215	115.075	112.194	98.8696	43.3217	104.79	-1.27306	3.41642e-34	3.31366e-32
Arl5c	217151	23.1895	22.8044	14.3292	13.5874	25.4016	19.1446	18.0606	15.3046	18.4776	19.4778	-0.0755999	0.668742	0.745481
Arl6	56297	9.52428	9.24405	8.9285	9.93333	5.62695	5.68938	4.92561	6.04047	9.40754	5.5706	0.754296	7.24525e-07	3.99137e-06
Arl6ip1	54208	252.789	242.324	260.974	276.856	269.804	326.039	293.113	345.027	258.235	308.496	-0.256549	0.0104587	0.0225347
Arl6ip4	65105	21.0438	22.2649	23.7367	22.9176	21.093	21.3871	24.7062	23.2855	22.4907	22.618	-0.00843284	0.933902	0.950807
Arl6ip5	65106	56.6563	52.335	58.449	57.5778	57.0733	52.3257	57.8954	62.22	56.2545	57.3786	-0.0294914	0.738495	0.803035
Arl6ip6	65103	16.8651	17.1572	16.5068	18.0219	14.4371	14.9502	14.7377	15.6489	17.1378	14.9435	0.197911	0.0790651	0.130186
Arl8a	68724	107.44	110.281	104.137	95.5728	134.082	154.402	165.438	148.351	104.358	150.568	-0.528581	9.43151e-10	8.66772e-09
Arl8b	67166	258.247	255.632	228.57	243.473	303.952	369.353	365.199	391.441	246.481	357.486	-0.536291	5.60494e-08	3.77071e-07
Armc1	74252	33.0526	35.3216	34.4945	36.9307	36.8485	39.7426	35.6129	46.1016	34.9499	39.5764	-0.179902	0.0630687	0.107527
Armc10	67211	36.7042	37.6237	36.9335	39.9107	30.7392	32.4336	34.1665	36.5558	37.793	33.4738	0.175057	0.0535127	0.0934198
Armc2	213402	9.82544	9.35196	3.87628	2.98	2.8617	5.81396	6.05928	5.03894	6.50842	4.94347	0.399595	0.233156	0.32367
Armc5	233912	25.7494	24.7108	27.613	26.2524	32.7649	35.133	34.8702	32.6749	26.0814	33.8607	-0.376435	6.33808e-05	0.000233122
Armc6	76813	6.39971	5.07164	6.70726	6.35024	8.36004	9.46845	8.24844	9.13895	6.13221	8.80397	-0.522692	0.00134807	0.00364635
Armc7	276905	17.1663	18.8478	20.0347	19.6183	18.585	17.1097	16.2232	15.5863	18.9168	16.876	0.164101	0.145105	0.218109
Armc8	74125	40.13	41.832	43.9021	44.4517	38.8099	38.5383	40.2649	38.9344	42.5789	39.1369	0.121539	0.143845	0.216612
Armc9	78795	8.5455	10.3951	9.53825	8.15952	5.11248	4.6927	5.70745	5.91528	9.15958	5.35698	0.770965	2.42576e-06	1.20389e-05
Armcx2	67416	6.0609	6.22265	7.01214	6.98881	4.43725	1.6196	1.36822	1.72138	6.57113	2.28661	1.5116	5.11045e-07	2.89827e-06
Armcx3	71703	29.7398	26.4373	33.3621	35.1214	31.3823	40.9469	46.4023	38.2772	31.1652	39.2522	-0.331986	0.00588021	0.013554
Armcx4	100503043	1.31759	1.36682	2.30834	2.41238	3.15109	1.32891	1.25095	0.500764	1.85128	1.55793	0.243916	0.559946	0.649719
Armcx5	494468	9.82544	10.8627	10.6271	10.2881	10.9324	12.5	12.0795	11.3611	10.4008	11.7182	-0.170492	0.19254	0.276197
Armcx6	278097	1.46817	1.11504	2.30834	2.44786	1.92924	1.41196	1.4855	1.53359	1.83485	1.59007	0.199339	0.515798	0.608991
Arnt	11863	57.221	56.6513	48.4317	47.3607	60.8032	67.442	69.154	62.5016	52.4162	64.9752	-0.309	0.000991872	0.00276485
Arnt2	11864	6.62559	5.61118	6.62016	6.27928	6.39864	2.82393	2.5019	1.4397	6.28405	3.29104	0.929076	0.00335341	0.00823019
Arntl	11865	20.5167	21.1858	17.0295	18.8379	34.2118	29.4436	28.42	36.2741	19.3925	32.0874	-0.726752	6.11135e-10	5.79967e-09
Arpc1a	56443	62.0772	61.0755	54.5727	52.5047	71.0925	67.7742	63.7983	70.1383	57.5575	68.2008	-0.244977	0.00448154	0.0106488
Arpc1b	11867	572.021	592.015	582.182	534.058	647.067	665.117	624.223	649.209	570.069	646.404	-0.181312	0.0450122	0.0804615
Arpc2	76709	381.046	378.97	454.308	475.062	394.24	448.34	480.52	488.621	422.347	452.93	-0.100868	0.344552	0.443953
Arpc3	56378	307.224	314.118	302.088	318.576	396.652	472.177	517.971	512.063	310.502	474.715	-0.612387	1.66186e-09	1.46849e-08
Arpc4	68089	226.964	221.677	261.67	250.568	304.981	362.21	312.776	381.363	240.22	340.332	-0.502671	9.20401e-07	4.97914e-06
Arpc5	67771	343.288	331.707	431.617	444.446	428.741	519.644	457.3	546.866	387.764	488.138	-0.332143	0.00424253	0.0101376
Arpc5l	74192	57.8233	54.5651	51.0013	53.6045	54.5653	51.3705	50.0379	53.3627	54.2486	52.3341	0.0516466	0.532587	0.62486
Arpp19	59046	70.0204	66.255	79.921	85.8169	85.6904	97.0101	89.6773	102.813	75.5033	93.7977	-0.313162	0.00101927	0.00283224
Arrb1	109689	169.178	169.45	168.727	172.201	152.41	170.598	180.293	168.1	169.889	167.85	0.0176452	0.835469	0.876976
Arrb2	216869	295.516	295.414	346.295	333.547	344.594	353.323	397.02	350.159	317.693	361.274	-0.185469	0.0541559	0.0943419
Arrdc1	215705	43.1792	47.695	48.8672	48.0702	34.662	39.4519	34.792	36.5871	46.9529	36.3732	0.368754	3.34599e-05	0.000131554
Arrdc2	70807	14.3052	14.7114	14.242	12.4167	11.7684	12.5	12.1967	11.6741	13.9188	12.0348	0.210182	0.107182	0.169222
Arrdc3	105171	202.796	195.168	81.3147	89.6838	73.1182	71.0965	73.9232	66.9772	142.241	71.2788	0.996908	4.37669e-06	2.06598e-05
Arrdc4	66412	33.3538	33.739	29.4423	31.29	34.1154	22.5914	20.8752	26.4153	31.9563	25.9993	0.295523	0.0166943	0.0339117
Arsa	11883	42.1628	44.3499	38.3272	32.8509	34.4369	45.9303	40.9685	40.7497	39.4227	40.5214	-0.0386262	0.724983	0.792188
Arsb	11881	67.9875	68.9887	47.4735	43.8131	92.3784	101.786	115.322	108.666	57.0657	104.538	-0.872861	2.37369e-11	2.81687e-10
Arsg	74008	10.4278	11.0065	5.48776	5.00214	7.20249	4.31894	3.24465	4.1313	7.98105	4.72435	0.75422	0.0108521	0.0232601
Arsk	77041	53.9458	55.3564	52.9177	52.6821	35.3051	41.03	40.1867	44.9123	53.7255	40.3585	0.412792	2.00873e-05	8.24234e-05
Art2a-ps	11871	0.527035	0.719381	1.26306	1.17071	1.76847	2.90698	2.93191	3.16107	0.920047	2.69211	-1.54811	1.01404e-05	4.40753e-05
Arv1	68865	3.57631	3.92063	4.00694	4.86024	4.88741	4.65117	4.14376	4.10001	4.09103	4.44559	-0.118675	0.551641	0.642078
Arvcf	11877	8.77137	9.20808	9.79957	8.54976	8.39219	6.97676	5.98109	6.16566	9.0822	6.87892	0.398006	0.0086977	0.0191114
Arxes2	76976	0.338808	0.575505	0.958181	1.56095	0.80385	0.373755	0.195461	0.0938933	0.858361	0.36674	1.20982	0.0256451	0.0493279
Asah1	11886	724.786	714.49	591.894	626.616	661.214	760.923	738.098	811.707	664.447	742.986	-0.161141	0.11804	0.183333
Asah2	54447	43.8569	43.4866	30.444	31.8221	30.8035	34.7592	35.3002	33.3321	37.4024	33.5488	0.158027	0.205284	0.291122
Asap1	13196	108.381	109.742	120.774	119.98	123.118	151.412	154.336	134.174	114.719	140.76	-0.294825	0.00309442	0.00768024
Asap2	211914	6.77617	6.11474	6.79437	6.03095	10.4179	11.5449	11.5713	10.516	6.42906	11.0125	-0.776015	1.23144e-06	6.47138e-06
Asap3	230837	4.70567	3.81272	5.57487	4.50547	4.53371	2.07642	1.91551	2.53512	4.64968	2.76519	0.738442	0.00446909	0.0106295
Asb1	65247	15.5099	14.1718	15.3744	13.8002	15.1445	12.2093	10.5549	15.0229	14.7141	13.2329	0.149023	0.276685	0.37162
Asb10	117590	7.67966	6.90606	10.6706	8.69166	5.27325	8.88706	7.4666	7.22978	8.48701	7.21417	0.235417	0.242164	0.333442
Asb13	142688	11.5195	9.96343	9.18982	7.52095	7.23465	8.63789	8.83482	9.20154	9.54842	8.47722	0.172023	0.259731	0.352742
Asb2	65256	1.46817	1.72652	2.83099	2.16405	3.24755	2.94851	3.44011	3.25497	2.04743	3.22278	-0.660589	0.0070891	0.0159699
Asb3	65257	19.0109	18.3442	20.9058	21.7469	12.1864	13.3721	12.1186	12.5504	20.0019	12.5569	0.671909	1.60391e-08	1.2069e-07
Asb6	72323	29.8904	30.6816	28.1792	26.5007	41.2214	41.1546	40.304	37.7764	28.813	40.1141	-0.476857	2.02501e-07	1.23792e-06
Asb7	117589	27.6317	26.6891	25.9144	29.0195	29.0029	27.0765	29.0845	31.7985	27.3137	29.2406	-0.0988456	0.317568	0.415686
Asb8	78541	25.9753	26.2934	25.174	24.1593	26.72	35.6313	29.4364	34.2085	25.4005	31.499	-0.309716	0.00544793	0.0126714
Ascc1	69090	17.0534	18.2363	15.3309	15.9998	11.061	12.2093	12.5486	12.9573	16.6551	12.194	0.450751	0.000271659	0.00086178
Ascc2	75452	66.3688	69.2405	57.2731	57.1521	52.5718	54.236	58.8336	51.0154	62.5086	54.1642	0.20753	0.0289271	0.0548275
Ascc3	77987	119.185	119.525	132.447	145.027	93.343	98.0899	96.9094	94.7696	129.046	95.778	0.430254	1.32491e-06	6.93298e-06
Asf1a	66403	13.6276	13.2006	17.1601	16.7802	17.4918	19.6429	16.536	19.0916	15.1922	18.1906	-0.260769	0.0454948	0.0811946
Asf1b	66929	6.70088	6.11474	11.5853	10.7848	8.55296	11.5449	12.3922	16.1496	8.79641	12.1599	-0.468892	0.0365436	0.0671556
Ash1l	192195	118.206	116.288	113.196	119.2	138.712	130.108	133.93	115.332	116.723	129.521	-0.149861	0.0882314	0.14308
Ash2l	23808	45.965	46.544	54.7034	57.6133	61.3498	65.8639	65.4793	63.7848	51.2064	64.1195	-0.324365	0.000390379	0.00119672
Asic1	11419	1.9952	1.47473	2.70033	2.73167	2.21862	2.11794	2.42371	1.62748	2.22548	2.09694	0.0860487	0.748577	0.810585
Asic3	171209	1.95756	1.47473	2.26479	1.49	0.80385	1.07974	0.74275	0.56336	1.79677	0.797424	1.17443	0.000335792	0.00104373
Asl	109900	50.106	47.6231	53.0919	51.1921	38.3919	43.231	44.4087	41.0627	50.5033	41.7735	0.274353	0.00113442	0.00312195
Asna1	56495	82.7069	78.6644	75.7834	65.8083	81.221	107.724	102.148	109.605	75.7407	100.174	-0.40318	7.37451e-05	0.000267804
Asns	27053	68.1005	70.3915	54.3114	60.0966	38.424	31.2293	29.3191	27.855	63.225	31.7068	0.995519	1.75157e-18	4.8053e-17
Asnsd1	70396	81.1634	77.2616	54.6598	60.6997	36.752	42.4419	37.8021	47.0405	68.4461	41.0091	0.739188	6.62044e-10	6.2443e-09
Asph	65973	372.501	365.985	579.525	601.392	294.273	291.404	286.663	269.098	479.851	285.36	0.749772	1.50204e-07	9.37765e-07
Aspm	12316	9.33605	9.02824	19.9911	21.8533	23.5689	31.3954	30.961	35.1474	15.0522	30.2682	-1.00827	1.27532e-05	5.43578e-05
Aspscr1	68938	39.7535	39.6379	41.0711	33.9862	38.1668	39.9502	39.053	40.8123	38.6122	39.4956	-0.0333967	0.698366	0.770831
Asrgl1	66514	10.3901	9.71165	14.0243	13.41	10.3536	8.01496	8.99119	8.20001	11.884	8.88994	0.41592	0.00841985	0.01858
Ass1	11898	10.4654	9.02824	2.43901	2.55428	3.72986	1.6196	1.17276	1.94046	6.12174	2.11567	1.5259	6.86238e-05	0.000250833
Aste1	66595	8.69608	9.49584	8.88495	9.54309	12.733	13.3721	12.1186	13.2077	9.15499	12.8578	-0.489164	0.000230493	0.000743639
Astn1	11899	1.01643	0.863258	7.31702	6.45666	3.72986	1.74419	2.11097	1.03283	3.91334	2.15446	0.856829	0.0956385	0.153255
Astn2	56079	1.20465	1.07907	1.69859	1.17071	2.57232	0.872095	0.430013	0.469466	1.28826	1.08597	0.233499	0.611328	0.695322
Asun	71177	29.6269	28.3796	27.9615	28.7712	37.8131	37.7492	40.1867	39.4352	28.6848	38.796	-0.435358	5.80667e-07	3.26307e-06
Asxl1	228790	82.1798	79.06	73.867	71.9457	97.2015	94.56	93.7038	93.236	76.7631	94.6753	-0.302501	0.000173418	0.000577496
Asxl2	75302	107.026	106.828	118.553	121.045	107.941	123.381	120.638	111.076	113.363	115.759	-0.0298377	0.721377	0.789228
Asxl3	211961	0.602326	0.539536	1.48082	1.45452	2.15432	0.664453	0.54729	0.312978	1.0193	0.919759	0.136654	0.788071	0.840356
Atad1	67979	97.8403	93.8793	84.2328	92.9121	87.3624	87.334	88.8955	85.3177	92.2161	87.2274	0.0806904	0.315785	0.413813
Atad2	70472	78.98	78.3406	83.4488	89.8257	72.9574	83.7626	81.1162	99.1513	82.6488	84.2469	-0.0278331	0.770703	0.827163
Atad2b	320817	35.6502	36.077	37.761	41.4362	43.3757	39.618	42.6495	40.9688	37.7311	41.653	-0.1428	0.10284	0.163182
Atad3a	108888	30.5304	34.89	34.1025	32.0705	36.7198	35.3406	36.6293	36.0237	32.8983	36.1784	-0.137508	0.116099	0.180707
Atad5	237877	9.97602	10.7188	17.2908	21.1793	12.5722	13.4136	13.7213	16.087	14.7912	13.9486	0.0838286	0.667163	0.744193
Atat1	73242	9.3737	10.1433	12.5435	13.41	9.26035	7.01828	9.73394	6.10306	11.3676	8.02891	0.501729	0.0054442	0.0126651
Atcay	16467	0.790553	0.899227	2.9181	2.98	3.27971	1.41196	1.29004	0.970231	1.89697	1.73798	0.119294	0.780171	0.834214
Ate1	11907	88.0525	90.8219	85.8007	93.125	62.7967	64.4935	64.9711	64.2543	89.45	64.1289	0.480471	4.37797e-10	4.26644e-09
Atf1	11908	25.0718	22.6965	21.9075	23.024	29.871	26.412	30.4137	29.0756	23.175	28.9431	-0.320784	0.00140088	0.00377347
Atf2	11909	73.7473	73.305	73.1702	73.5776	79.8383	84.1364	84.009	81.6246	73.45	82.4021	-0.165623	0.0309431	0.0581032
Atf3	11910	348.973	358.576	483.925	480.915	630.186	665.491	627.859	591.34	418.097	628.719	-0.588602	3.70416e-07	2.15939e-06
Atf4	11911	361.772	372.855	319.945	318.328	515.493	449.253	429.388	465.742	343.225	464.969	-0.438001	9.54983e-06	4.18034e-05
Atf5	107503	53.7576	55.6082	20.7315	19.3345	11.5754	9.80068	9.30393	9.45192	37.358	10.033	1.89616	1.25282e-12	1.73786e-11
Atf6	226641	215.369	216.354	192.377	198.489	166.718	156.935	170.129	168.257	205.647	165.51	0.313249	0.00036272	0.00112036
Atf6b	12915	44.5345	45.5009	43.0746	37.7112	31.2215	29.8589	30.8046	24.913	42.7053	29.1995	0.549177	1.69397e-08	1.26462e-07
Atf7ip	54343	38.6618	39.7099	37.761	39.7688	33.7617	38.4137	39.1312	36.0237	38.9754	36.8326	0.0828694	0.371816	0.471003
Atg10	66795	14.7946	14.4236	11.9773	12.7005	10.8359	13.0399	10.7894	14.1779	13.474	12.2108	0.142373	0.310337	0.408019
Atg12	67526	109.924	102.296	75.8705	81.205	79.0988	88.2061	85.1817	86.5383	92.324	84.7562	0.123861	0.254658	0.347185
Atg13	51897	28.6481	27.9839	27.0033	24.9752	22.6364	20.515	19.1551	18.5909	27.1526	20.2243	0.424559	0.000109403	0.000382196
Atg14	100504663	34.2949	30.7536	27.4824	26.7845	27.6524	29.6512	27.599	30.1397	29.8288	28.7606	0.0528757	0.624609	0.706629
Atg16l1	77040	64.2983	66.0752	74.7816	73.7195	70.8674	64.4104	66.6521	61.6566	69.7187	65.8966	0.0810103	0.357518	0.456789
Atg16l2	73683	28.8364	27.3365	32.4475	28.3455	40.1603	46.4702	43.4704	40.3115	29.2414	42.6031	-0.542957	4.513e-08	3.09528e-07
Atg2a	329015	99.1579	103.087	89.3721	77.2671	100.385	88.9536	90.811	79.2146	92.2211	89.841	0.0377636	0.718304	0.786705
Atg2b	76559	70.8109	72.154	63.1093	68.0433	68.5201	71.7609	69.3885	67.4154	68.5294	69.2712	-0.0147707	0.854395	0.891978
Atg3	67841	50.0683	47.695	48.2139	48.6733	46.141	52.3672	59.1073	56.5864	48.6626	53.5505	-0.13764	0.123714	0.190584
Atg4a	666468	16.1875	15.2149	14.7647	17.2769	13.2474	16.2376	14.6205	14.8664	15.861	14.743	0.107836	0.369092	0.468322
Atg4b	66615	42.0499	41.1846	40.4614	41.2943	47.62	56.3124	50.1552	52.3299	41.2475	51.6044	-0.322366	0.000165182	0.000552759
Atg4c	242557	17.3169	18.3442	15.7229	16.7093	8.29573	8.67942	9.53848	7.82444	17.0233	8.58452	0.9907	1.3975e-15	2.82666e-14
Atg4d	235040	9.97602	10.7188	10.2351	9.86238	15.7555	14.4519	14.6986	12.4565	10.1981	14.3406	-0.49106	0.000190149	0.000627782
Atg5	11793	65.1265	64.7443	52.7435	60.0966	48.5525	54.2775	52.5789	59.4032	60.6777	53.703	0.17662	0.0663981	0.112269
Atg7	74244	84.0998	83.4482	69.6859	66.1631	56.3981	63.746	63.5247	60.0917	75.8492	60.9401	0.316433	0.00080098	0.0022781
Atg9a	245860	33.9938	33.6671	32.1426	29.0195	31.9932	33.2642	34.6747	32.581	32.2057	33.1283	-0.040447	0.679838	0.755198
Athl1	212974	12.8371	15.071	16.8117	16.2836	10.1285	9.84221	10.164	9.26414	15.2508	9.8497	0.630374	1.04721e-06	5.58662e-06
Atic	108147	40.0547	40.2494	46.3411	46.0126	46.559	56.6446	57.9736	59.3406	43.1644	55.1294	-0.352907	0.000256419	0.000817434
Atl1	73991	5.45858	6.58234	4.96512	7.02428	4.34079	3.69602	3.16646	3.22367	6.00758	3.60673	0.736403	0.000494336	0.00147833
Atl2	56298	29.5893	29.3508	28.3534	28.4164	45.0156	45.432	36.8639	45.0062	28.9275	43.0794	-0.574861	2.10908e-09	1.83732e-08
Atl3	109168	152.765	140.136	136.454	148.078	132.989	138.538	129.356	140.996	144.358	135.47	0.0917487	0.252634	0.344929
Atm	11920	55.941	57.6944	55.618	61.3738	29.3566	32.5997	30.57	34.0207	57.6568	31.6368	0.866064	1.99258e-22	7.52904e-21
Atmin	234776	62.0772	60.7877	59.9734	58.2874	55.9479	46.6363	44.4087	53.081	60.2814	50.0185	0.268008	0.00494339	0.0116052
Atn1	13498	13.1382	14.0639	13.4581	11.6717	16.2378	14.3688	14.0732	9.48322	13.083	13.5407	-0.048858	0.781216	0.83523
Atox1	11927	131.081	138.337	122.342	120.193	97.7803	93.0649	72.125	95.5208	127.988	89.6227	0.513682	1.93386e-07	1.18632e-06
Atp10a	11982	7.98082	7.22978	9.58181	9.33024	6.91311	3.8206	3.63557	3.94352	8.53066	4.5782	0.88977	1.72998e-06	8.84963e-06
Atp10d	231287	6.66323	6.54637	6.88148	6.95333	5.81987	5.2741	5.16016	6.16566	6.7611	5.60495	0.267363	0.109585	0.172265
Atp11a	50770	107.214	105.893	124.128	117.816	114.79	102.866	107.464	89.762	113.763	103.72	0.133221	0.141454	0.21358
Atp11b	76295	38.7747	38.4509	41.7244	44.9128	45.9802	49.7094	45.2296	42.252	40.9657	45.7928	-0.159891	0.0761256	0.126037
Atp11c	320940	79.1682	79.7434	93.3355	106.677	96.0761	110.507	106.37	105.38	89.731	104.583	-0.220724	0.0246022	0.0475821
Atp13a1	170759	90.0854	90.4622	96.1665	85.7104	88.0376	88.4968	88.5046	81.7185	90.6061	86.6894	0.0637029	0.421019	0.518975
Atp13a2	74772	350.591	364.798	287.672	247.837	299.514	331.687	324.113	299.488	312.725	313.701	-0.00439577	0.969635	0.978132
Atp13a3	224088	142.939	136.359	135.365	143.643	168.873	185.839	171.419	178.929	139.577	176.265	-0.336491	2.33321e-05	9.4448e-05
Atp1a1	11928	372.35	364.475	507.531	498.831	613.916	672.883	629.696	666.079	435.797	645.644	-0.567129	9.84174e-07	5.27548e-06
Atp1a2	98660	4.40451	3.84869	10.4529	10.5364	10.6751	2.69934	3.36192	2.69161	7.31063	4.857	0.585843	0.142059	0.214288
Atp1a3	232975	46.0403	43.9182	24.782	21.4986	39.5494	41.03	46.7151	40.155	34.0598	41.8624	-0.296979	0.113514	0.177288
Atp1b1	11931	2.33401	1.61861	5.48776	6.17286	3.56909	0.996679	1.17276	0.719849	3.90331	1.6146	1.2645	0.00524618	0.0122461
Atp1b2	11932	0.790553	0.683412	3.17942	2.66071	2.28293	0.996679	1.40732	0.56336	1.82852	1.31257	0.471226	0.319701	0.418011
Atp1b3	11933	284.223	288.904	195.382	209.309	375.205	445.931	463.476	441.455	244.454	431.517	-0.81968	7.91907e-11	8.79595e-10
Atp2a2	11938	222.371	227.181	189.894	190.223	357.07	388.041	372.04	382.553	207.417	374.926	-0.853935	1.98585e-18	5.41189e-17
Atp2a3	53313	2.29637	2.87753	1.7857	2.44786	7.52403	10.0083	9.22574	9.98399	2.35186	9.18552	-1.95744	3.81425e-18	1.00824e-16
Atp2b1	67972	691.997	697.332	500.257	520.152	927.257	908.598	981.134	968.353	602.435	946.335	-0.651501	1.68438e-08	1.25823e-07
Atp2b4	381290	5.15742	4.9997	4.39892	3.15738	33.2151	39.7426	40.0303	37.4008	4.42835	37.5972	-3.08507	3.25095e-81	3.0804e-78
Atp2c1	235574	192.33	189.881	174.694	187.066	162.153	138.788	137.956	144.971	185.993	145.967	0.349431	0.000103226	0.000363089
Atp5a1	11946	510.772	498.423	492.113	472.933	597.71	675.5	683.682	711.116	493.56	667.002	-0.434451	3.07642e-06	1.49371e-05
Atp5b	11947	534.753	551.01	556.267	542.502	615.363	702.825	644.121	781.223	546.133	685.883	-0.328734	0.000737916	0.00211781
Atp5c1	11949	165.451	163.803	147.56	152.831	152.217	178.073	175.954	194.297	157.411	175.135	-0.15381	0.116679	0.181403
Atp5d	66043	62.0396	68.7729	63.0657	55.13	69.2918	69.5599	70.014	69.5123	62.252	69.5945	-0.160931	0.0660908	0.111812
Atp5e	67126	60.0067	57.4786	34.4945	39.5205	57.7485	63.746	38.7012	75.9597	47.8751	59.0388	-0.302348	0.0842104	0.137409
Atp5f1	11950	185.178	181.608	173.692	180.006	173.213	204.568	188.072	232.042	180.121	199.474	-0.147241	0.139272	0.210963
Atp5g1	11951	57.4092	56.1477	59.8427	57.365	58.5202	73.0068	70.4831	79.8093	57.6912	70.4549	-0.288391	0.00220561	0.00566369
Atp5g2	67942	37.0807	35.3216	32.2297	31.4319	32.3469	34.9253	36.8248	38.2459	34.016	35.5857	-0.0648258	0.49516	0.589483
Atp5g3	228033	60.9479	55.2485	54.9647	57.6843	80.2563	94.9337	72.3986	106.788	57.2113	88.5942	-0.631055	2.98691e-09	2.53568e-08
Atp5h	71679	108.946	109.957	85.3652	82.5531	103.246	120.806	110.123	126.568	96.7054	115.186	-0.252052	0.0162847	0.0332056
Atp5j	11957	47.1697	46.8317	48.3881	51.4405	57.845	67.6496	60.9055	76.6795	48.4575	65.7699	-0.440845	4.38391e-06	2.06821e-05
Atp5j2	57423	73.1826	73.9164	66.3758	68.6464	78.7451	93.2726	80.4907	97.0857	70.5303	87.3985	-0.309122	0.000710512	0.00204775
Atp5k	11958	45.5133	43.2348	44.1634	44.3097	57.3305	60.4652	66.7303	71.8597	44.3053	64.0964	-0.53299	4.99694e-09	4.10075e-08
Atp5l	27425	4.02805	3.59691	1.95991	1.91571	3.50478	2.99004	3.83103	3.47405	2.87515	3.44998	-0.260607	0.332723	0.431163
Atp5o	28080	83.5351	84.923	76.8287	83.0852	91.5102	122.135	114.11	130.293	82.093	114.512	-0.479776	1.71669e-06	8.79625e-06
Atp5s	68055	5.45858	4.92776	4.09404	4.39905	1.92924	2.94851	2.18916	3.34886	4.71986	2.60394	0.85753	0.000389294	0.00119406
Atp5sl	66349	20.592	22.5166	21.1671	19.9376	15.7876	15.1578	15.7932	16.9947	21.0533	15.9333	0.400855	0.000497969	0.00148847
Atp6ap1	54411	422.268	417.097	373.952	360.048	373.372	431.188	421.1	431.94	393.341	414.4	-0.0751781	0.439664	0.537227
Atp6ap2	70495	334.63	325.844	292.985	305.556	364.948	403.863	360.82	433.662	314.754	390.823	-0.312269	0.00155601	0.00414063
Atp6v0a1	11975	269.089	263.509	338.412	328.084	411.764	625.956	657.842	529.089	299.774	556.163	-0.891583	4.19543e-11	4.82534e-10
Atp6v0a2	21871	31.3962	28.7393	31.5329	28.4164	31.6074	31.9768	30.3746	32.7062	30.0212	31.6662	-0.0780517	0.377691	0.477071
Atp6v0b	114143	290.509	294.407	254.92	228.644	275.913	331.894	295.732	320.364	267.12	305.976	-0.195851	0.0594368	0.102183
Atp6v0c	11984	177.423	182.147	144.816	142.685	222.698	232.849	245.069	230.039	161.768	232.664	-0.524125	3.72174e-07	2.16743e-06
Atp6v0d1	11972	152.652	155.962	129.398	128.388	184.049	227.409	218.525	228.661	141.6	214.661	-0.599995	3.7525e-09	3.14231e-08
Atp6v0d2	242341	245.335	246.424	35.5833	38.2078	30.9	28.7376	28.1854	27.2604	141.388	28.7708	2.29684	1.84436e-07	1.13538e-06
Atp6v0e	11974	119.599	117.691	138.544	129.665	115.915	134.593	125.447	138.367	126.375	128.581	-0.0251208	0.777717	0.832024
Atp6v0e2	76252	3.95276	3.52497	6.09751	5.03762	7.17034	2.15947	2.73645	2.15955	4.65322	3.55645	0.381139	0.248798	0.340849
Atp6v1a	11964	1075.34	1042.6	959.923	1011.04	772.242	933.224	867.259	920.53	1022.22	873.314	0.227178	0.0192718	0.038394
Atp6v1b2	11966	388.801	393.394	439.195	426.282	445.397	547.758	482.71	549.025	411.918	506.223	-0.297419	0.00304856	0.0075771
Atp6v1c1	66335	274.058	271.243	227.35	235.172	234.37	264.162	255.858	263.277	251.956	254.417	-0.0138751	0.885701	0.915532
Atp6v1d	73834	110.79	107.979	103.919	101.391	130.674	163.372	176.814	171.074	106.02	160.483	-0.597838	5.49561e-10	5.28042e-09
Atp6v1e1	11973	189.808	197.758	183.971	189.301	216.428	255.275	245.303	264.278	190.209	245.321	-0.366967	0.000112563	0.000392678
Atp6v1f	66144	130.253	130.352	101.654	95.6438	110.352	133.638	118.879	141.528	114.476	126.1	-0.139358	0.206759	0.292843
Atp6v1g1	66290	253.805	251.1	210.451	216.547	263.373	333.348	302.378	344.494	232.976	310.898	-0.416138	0.000112884	0.000393356
Atp6v1g2	66237	3.2375	3.41706	3.74561	3.90238	1.99355	2.7824	3.4792	2.31603	3.57564	2.64279	0.441855	0.0676616	0.114063
Atp6v1h	108664	115.082	111.828	112.107	121.506	165.657	206.936	178.221	211.448	115.131	190.565	-0.726847	9.1671e-15	1.69805e-13
Atp7a	11977	151.786	153.984	155.53	168.015	158.744	147.716	142.53	143.657	157.329	148.162	0.0865719	0.303078	0.400416
Atp8a1	11980	268.675	264.193	221.253	238.826	176.654	171.387	159.77	165.628	248.237	168.36	0.560227	2.58265e-09	2.22003e-08
Atp8b2	54667	38.7371	38.5948	42.2471	39.2012	62.2823	40.5316	41.5158	49.5131	39.695	48.4607	-0.289612	0.0126176	0.0265909
Atp8b4	241633	8.92195	9.17211	19.4249	20.7536	1.76847	1.57808	0.977303	1.4084	14.5681	1.43306	3.33672	2.23203e-32	1.96387e-30
Atp9a	11981	6.1362	5.82699	6.88148	4.82476	14.5014	4.60964	3.9483	3.91222	5.91736	6.7429	-0.191805	0.564722	0.654274
Atp9b	50771	118.959	118.41	114.241	118.597	113.053	108.638	110.709	107.445	117.552	109.961	0.0963804	0.200911	0.285908
Atpaf1	230649	12.5359	13.6682	11.4546	13.1971	9.48542	11.005	10.2812	12.2687	12.714	10.7601	0.241495	0.0713214	0.119204
Atpaf2	246782	16.8651	18.9557	18.5539	18.6605	20.6107	22.8406	21.5398	22.5657	18.2588	21.8892	-0.261125	0.0149301	0.0307951
Atpif1	11983	103.111	104.742	114.895	108.983	88.327	109.842	127.87	123.814	107.932	112.463	-0.0592534	0.564159	0.653807
Atr	245000	57.2586	55.9319	49.6947	54.4914	40.0639	46.3456	40.6558	48.668	54.3442	43.9333	0.307145	0.000714502	0.00205781
Atraid	381629	50.1813	49.3136	39.808	39.7333	45.9802	49.6263	48.1224	54.9276	44.7591	49.6641	-0.149775	0.136592	0.207414
Atrip	235610	16.9781	17.0853	15.81	15.0064	14.0834	15.3239	13.2131	13.3641	16.2199	13.9962	0.213837	0.0662905	0.11212
Atrn	11990	82.3681	87.8005	91.5498	97.595	79.5811	79.4437	78.5752	76.1788	89.8283	78.4447	0.195624	0.0151486	0.0311936
Atrnl1	226255	12.3477	11.9417	8.14453	8.76262	20.9644	23.7542	22.1261	22.6909	10.2991	22.3839	-1.11763	2.30327e-12	3.08387e-11
Atrx	22589	251.546	239.086	251.871	283.135	221.605	214.369	245.733	208.224	256.41	222.483	0.204872	0.0295186	0.0558027
Atxn1	20238	112.371	113.734	104.616	103.236	94.8221	101.288	103.516	91.3895	108.489	97.7538	0.150885	0.0636774	0.10839
Atxn10	54138	105.671	104.13	94.7728	97.9497	113.15	141.279	137.8	144.815	100.631	134.261	-0.415579	3.55365e-06	1.7026e-05
Atxn1l	52335	96.5604	97.4402	102.482	102.1	93.6002	97.5915	98.6294	93.8933	99.6457	95.9286	0.0549987	0.472151	0.567852
Atxn2	20239	65.2394	62.2984	59.5814	58.9259	88.0376	87.4171	99.0594	79.5589	61.5113	88.5183	-0.524621	2.28491e-08	1.6664e-07
Atxn2l	233871	102.81	102.836	101.611	96.7081	99.8381	98.6297	103.477	86.7261	100.991	97.1677	0.0559425	0.544776	0.635769
Atxn3	110616	119.185	121.575	130.922	139.954	101.767	123.713	119.114	125.035	127.909	117.407	0.1238	0.174278	0.253934
Atxn7	246103	43.5933	46.2562	40.9404	43.2455	53.4078	48.1313	50.8979	47.1031	43.5089	49.885	-0.196912	0.0213446	0.0420676
Atxn7l1	380753	19.7262	19.819	23.9981	25.8267	21.2216	24.6678	26.9345	19.5298	22.3425	23.0884	-0.0458294	0.728469	0.795057
Atxn7l2	72522	6.1362	5.89893	5.83619	5.3569	7.07388	5.73091	6.68475	4.75726	5.80705	6.0617	-0.0615122	0.755561	0.815617
Atxn7l3	217218	83.7233	85.6783	84.9732	77.4445	82.0248	80.1496	73.7668	73.5497	82.9548	77.3728	0.100374	0.213375	0.301105
Atxn7l3b	382423	80.1846	81.1103	78.9192	85.9233	91.7996	104.817	92.7656	103.001	81.5344	98.0959	-0.266438	0.00106294	0.00294165
AU019823	270156	28.2717	25.7179	27.0468	29.5871	35.9803	35.922	33.1892	36.3993	27.6559	35.3727	-0.355128	0.000197487	0.000648877
AU020206	100504230	17.8439	17.8766	19.033	18.3057	19.5818	15.2824	14.425	14.5535	18.2648	15.9607	0.192896	0.150767	0.225163
AU022252	230696	19.4627	18.632	19.2072	19.1217	14.9516	16.4867	15.7932	16.087	19.1059	15.8297	0.271892	0.0126913	0.0267278
AU040320	100317	69.4181	69.3124	65.5047	63.8926	49.0991	54.4851	54.2208	52.7054	67.0319	52.6276	0.349663	1.45917e-05	6.13869e-05
AU040972	104522	1.27994	1.43876	2.22124	1.84476	1.51124	1.95183	1.79824	1.87787	1.69618	1.78479	-0.0759358	0.787618	0.840208
AU041133	216177	3.53866	3.09334	3.31008	3.15738	1.92924	1.82725	2.18916	2.19084	3.27487	2.03412	0.683768	0.00386976	0.00934662
Auh	11992	23.7919	25.8977	26.0015	26.3943	17.7168	19.5183	20.6015	19.9993	25.5214	19.459	0.391829	0.000338922	0.00105266
Aup1	11993	124.079	126.395	122.037	111.111	105.594	108.015	125.447	109.417	120.906	112.118	0.109028	0.197819	0.282291
Aurka	20878	4.96919	4.64001	7.31702	8.3369	9.38896	12.417	12.8222	13.8336	6.31578	12.1154	-0.939832	2.84989e-06	1.39638e-05
Aurkaip1	66077	53.5317	52.5868	42.2035	42.5005	38.6169	40.6147	38.6621	43.6604	47.7056	40.3885	0.240381	0.0148344	0.0306285
Aurkb	20877	5.79739	5.53924	10.2787	10.9621	8.42434	12.2924	11.9231	14.8351	8.14436	11.8687	-0.544095	0.0166322	0.0338078
Auts2	319974	1.31759	1.22295	4.22471	4.96667	2.60447	1.37043	1.56368	0.907635	2.93298	1.61156	0.858862	0.0393398	0.0716634
Aven	74268	8.05611	7.76932	6.40239	6.35024	9.03527	9.84221	10.0467	10.4535	7.14451	9.8444	-0.461008	0.00289535	0.00723163
Avl9	78937	130.893	124.129	110.539	113.772	111.221	117.193	116.221	122.781	119.833	116.854	0.036488	0.653751	0.732678
Avpi1	69534	6.0609	6.29459	3.5714	3.76047	9.61404	11.0465	8.4439	10.7038	4.92184	9.95208	-1.01283	4.0757e-06	1.93243e-05
AW011738	100382	1.09172	1.43876	0.82752	0.993333	0.48231	0.49834	0.508198	0.125191	1.08783	0.40351	1.44801	0.000219694	0.000713206
AW112010	107350	11.4818	11.618	2.83099	2.98	6.52726	4.77576	4.22195	4.75726	7.22771	5.07056	0.511411	0.14657	0.219936
AW146154	101835	6.21149	6.87009	7.92677	8.97547	2.82955	4.60964	4.14376	4.28779	7.49595	3.96769	0.920973	3.13557e-06	1.52003e-05
AW209491	105351	7.41614	7.37366	6.31528	7.84024	7.6848	8.13955	7.50569	8.98246	7.23633	8.07812	-0.157685	0.307638	0.40525
AW549877	106064	75.1025	69.4563	64.503	68.8238	47.5236	48.2144	46.676	46.6024	69.4714	47.2541	0.556365	5.42152e-11	6.14938e-10
AW554918	225289	14.0417	15.2509	15.8971	18.0574	8.74588	8.01496	8.913	9.32673	15.8118	8.75015	0.852029	6.66546e-10	6.27715e-09
Axin1	12005	70.9992	75.3192	62.2817	67.0855	77.3303	73.2144	75.1351	70.42	68.9214	74.0249	-0.102533	0.231387	0.321623
Axl	26362	184.538	183.766	122.647	121.506	223.631	142.525	151.443	141.56	153.114	164.79	-0.106068	0.497043	0.591123
AY036118	170798	16.8275	24.5309	14.4163	11.104	42.0253	40.407	13.6432	36.9314	16.7197	33.2517	-0.99173	0.00213294	0.00548966
Azi2	27215	95.6569	92.4045	96.4278	94.0474	104.468	106.977	99.6849	105.16	94.6341	104.073	-0.137284	0.0770288	0.127378
Azin1	54375	252.525	238.007	245.773	274.337	374.851	336.421	331.501	365.495	252.661	352.067	-0.478702	4.32036e-07	2.48567e-06
B130006D01Rik	320616	3.53866	4.06451	4.22471	4.75381	3.60125	3.48838	3.20555	2.87939	4.14542	3.29364	0.332869	0.127247	0.195245
B130046B21Rik	100049164	4.0657	3.88466	4.05049	3.90238	3.92279	3.8206	3.87012	3.44275	3.97581	3.76407	0.0794372	0.693221	0.767146
B130055M24Rik	654803	3.19986	3.38109	2.56967	3.15738	3.34401	3.44685	3.08828	2.7542	3.077	3.15834	-0.0328711	0.883381	0.913979
B230118H07Rik	68170	9.48663	9.71165	7.1428	10.1107	8.16711	8.34719	8.13116	10.0466	9.11295	8.67301	0.0724074	0.641159	0.720875
B230216N24Rik	78603	1.43052	1.40279	2.70033	3.40571	1.12539	1.70266	2.03279	1.03283	2.23484	1.47342	0.607265	0.0828849	0.13557
B230219D22Rik	78521	140.794	146.358	137.63	141.373	109.902	116.196	105.627	118.212	141.538	112.484	0.331467	2.51192e-05	0.000101018
B230307C23Rik	245305	5.45858	4.38823	5.31355	6.03095	3.69771	4.48506	4.76924	5.35192	5.29783	4.57598	0.211004	0.250707	0.342829
B230319C09Rik	320775	7.26556	8.4887	9.40759	9.25928	7.52403	8.47178	8.01388	5.75879	8.60528	7.44212	0.212185	0.221073	0.309839
B230325K18Rik	319527	0.677617	0.755351	1.2195	1.13524	1.47908	1.24585	1.0164	1.03283	0.946927	1.19354	-0.338907	0.314954	0.4129
B230354K17Rik	320063	26.2012	25.4301	24.9127	26.749	20.1605	21.7608	21.6961	21.6893	25.8233	21.3267	0.276821	0.00631974	0.0144642
B230369F24Rik	320110	0.715262	0.935196	1.7857	1.27714	0.771696	0.872095	0.860027	1.00153	1.17833	0.876336	0.415882	0.23548	0.326244
B2m	12010	2313.42	2288.89	2389.88	2454.7	2139.91	2224.38	2298.03	2284.45	2361.72	2236.69	0.0784732	0.394009	0.492632
B330016D10Rik	320456	3.53866	2.94946	3.65851	2.66071	2.54016	3.07309	2.38462	2.22214	3.20184	2.55501	0.326173	0.160707	0.237788
B3galnt1	26879	68.891	65.7874	73.3444	76.8769	42.5397	46.0134	46.9105	51.0779	71.2249	46.6354	0.610674	6.55797e-11	7.37727e-10
B3galnt2	97884	38.323	34.6022	23.3012	26.6426	15.4661	13.4552	12.6658	13.8023	30.7173	13.8473	1.14889	4.18847e-16	9.01986e-15
B3galt2	26878	3.31279	3.56094	4.96512	3.725	4.43725	5.73091	4.80833	3.75573	3.89096	4.68305	-0.26652	0.25059	0.342708
B3galt4	54218	7.37849	7.30172	8.2752	7.48547	4.69448	5.56479	4.76924	4.47558	7.61022	4.87602	0.644012	6.23262e-05	0.000229654
B3galt5	93961	4.32922	5.14358	1.08884	1.31262	5.98064	1.53655	1.40732	1.84657	2.96856	2.69277	0.138315	0.776175	0.831002
B3galt6	117592	8.58314	8.4887	9.01561	7.76928	9.2925	9.46845	7.54478	10.6099	8.46418	9.22892	-0.12797	0.389629	0.488527
B3gat1	76898	1.43052	0.827289	4.48603	3.19286	4.0514	2.201	1.21186	1.03283	2.48417	2.12427	0.219718	0.63071	0.711651
B3gat2	280645	3.68925	3.84869	4.26826	4.89571	5.75556	5.02493	4.9647	4.94505	4.17548	5.17256	-0.309352	0.108161	0.170461
B3gat3	72727	25.2977	27.7681	28.6148	25.8621	25.884	29.319	31.1564	25.9145	26.8857	28.0685	-0.0609893	0.544546	0.635622
B3gnt1	108902	25.9	25.3582	25.2611	22.6693	20.3856	21.3456	18.0606	23.0665	24.7972	20.7145	0.258158	0.0216957	0.0426914
B3gnt2	53625	1.31759	1.65458	1.2195	1.98667	2.21862	1.82725	1.95461	3.56794	1.54458	2.39211	-0.631789	0.0312786	0.0586438
B3gnt3	72297	10.3148	8.0211	13.0225	11.9909	5.46618	6.76911	6.52838	7.29238	10.8374	6.51401	0.732881	3.60348e-05	0.000140601
B3gnt7	227327	6.70088	8.56064	3.78917	3.83143	18.2313	20.8887	20.2497	22.284	5.72053	20.4134	-1.83149	1.26935e-17	3.17802e-16
B3gnt8	232984	11.5195	13.8121	11.8901	9.89785	9.22819	11.2126	10.7112	10.7977	11.7799	10.4875	0.168656	0.258197	0.351162
B3gnt9	97440	1.05407	1.58264	1.48082	1.56095	2.21862	1.99336	0.977303	1.50229	1.41962	1.67289	-0.237954	0.459148	0.555196
B3gntl1	210004	8.58314	7.9132	8.88495	9.61404	5.59479	6.3123	6.02019	6.22825	8.74883	6.03888	0.535221	0.00119184	0.0032661
B430305J03Rik	100532729	5.91032	6.0428	5.09578	3.83143	11.4468	17.2342	16.0669	15.1481	5.22008	14.974	-1.51841	7.64925e-15	1.43633e-13
B430306N03Rik	320148	12.7241	12.9489	29.5294	27.8488	23.1187	22.4253	25.5272	20.8443	20.7628	22.9789	-0.146999	0.487956	0.582935
B430319F04Rik	619306	1.43052	1.40279	1.48082	1.88024	1.02893	0.872095	1.25095	0.876337	1.54859	1.00708	0.621976	0.0451615	0.0806932
B4galnt1	14421	51.6871	55.5722	51.3933	42.2876	41.5429	33.2226	39.3658	38.5588	50.2351	38.1726	0.394997	0.000140953	0.000478594
B4galt1	14595	140.267	136.79	129.267	131.404	249.901	269.27	288.578	274.262	134.432	270.503	-1.00859	5.86426e-30	4.24917e-28
B4galt2	53418	1.09172	1.76248	2.78743	1.59643	1.83278	1.07974	0.664566	0.625955	1.80952	1.05076	0.771719	0.0417422	0.0753489
B4galt3	57370	16.7145	17.5529	18.6845	16.4255	18.1992	18.2725	18.1387	17.7145	17.3444	18.0812	-0.0607033	0.5885	0.676163
B4galt4	56375	7.07733	7.98513	8.79784	8.97547	4.91956	4.19436	4.61287	5.10154	8.20894	4.70708	0.797819	9.6726e-07	5.20293e-06
B4galt5	56336	110.037	107.727	93.9017	89.1516	216.654	245.598	241.198	193.17	100.205	224.155	-1.16114	1.31486e-31	1.08701e-29
B4galt6	56386	148.662	140.495	257.881	263.056	178.358	245.806	247.922	215.986	202.523	222.018	-0.132573	0.442616	0.54003
B4galt7	218271	47.772	49.3496	45.6878	43.7776	64.7903	67.0682	62.9774	66.1009	46.6467	65.2342	-0.483702	2.57158e-09	2.21206e-08
B630005N14Rik	101148	90.6877	85.8941	97.6473	106.89	122.571	143.854	125.486	139.619	95.2797	132.883	-0.479791	9.95001e-08	6.40022e-07
B630019K06Rik	102941	2.18343	1.58264	1.26306	1.20619	2.73309	2.11794	2.11097	2.15955	1.55883	2.28039	-0.548152	0.0546139	0.0950189
B930036N10Rik	100048917	3.6516	3.489	2.65677	3.22833	7.97419	7.64121	8.48299	6.72902	3.25643	7.70685	-1.23703	2.9306e-11	3.42172e-10
B930041F14Rik	230991	4.81861	4.24435	4.18115	3.19286	5.01602	6.14619	6.9584	6.10306	4.10924	6.05592	-0.558276	0.00709788	0.0159839
B930095G15Rik	320268	1.27994	1.18698	2.39545	2.34143	2.12216	1.70266	1.13367	0.970231	1.80095	1.48218	0.277031	0.415547	0.51372
B9d1	27078	1.76933	1.87039	1.30661	1.38357	1.15754	1.20432	1.40732	0.594657	1.58248	1.09096	0.548573	0.0801379	0.131654
B9d2	232987	4.55509	4.89179	2.83099	2.235	7.04172	6.68606	7.19295	5.88398	3.62822	6.70118	-0.881926	0.000232503	0.00074934
Babam1	68251	46.4167	47.4792	52.2208	47.7155	43.6008	51.2044	49.0997	51.1405	48.4581	48.7614	-0.00904871	0.917494	0.938683
Bace1	23821	32.6762	31.0413	30.2262	31.3255	23.5367	16.3622	17.1614	15.7115	31.3173	18.1929	0.782042	6.79632e-10	6.38088e-09
Bach1	12013	234.305	230.022	173.518	181.461	292.601	296.678	285.177	310.599	204.826	296.264	-0.532372	1.43358e-06	7.44471e-06
Bach2	12014	5.308	5.61118	7.66544	6.24381	8.58511	7.84885	8.48299	6.13436	6.20711	7.76283	-0.323785	0.0684933	0.115212
Bad	12015	20.6297	21.1138	19.3814	17.7381	17.7168	17.6911	18.9988	17.1512	19.7157	17.8895	0.14079	0.215785	0.30395
Bag1	12017	122.46	121.252	114.546	118.561	134.693	147.218	148.433	164.626	119.205	148.742	-0.319327	0.000215165	0.000700237
Bag2	213539	4.36686	4.81986	4.83446	4.18619	4.11571	4.56811	4.9647	6.25955	4.55184	4.97702	-0.131118	0.542793	0.634324
Bag3	29810	25.3353	25.2863	26.0451	24.6559	46.5911	43.8124	52.3444	42.9718	25.3307	46.4299	-0.874011	2.10114e-18	5.71343e-17
Bag4	67384	25.7118	24.3151	20.688	23.024	19.1959	17.0266	17.826	19.4985	23.4347	18.3868	0.34929	0.0019261	0.00501071
Bag5	70369	25.2977	24.0273	23.0399	23.2369	30.4177	29.3605	29.6709	30.5779	23.9005	30.0068	-0.328346	0.000516553	0.00153916
Bag6	224727	162.703	171.321	171.34	152.015	162.217	156.313	161.177	141.184	164.345	155.223	0.0824121	0.352821	0.452196
Bahcc1	268515	10.0137	8.30886	13.5452	11.7071	7.65265	6.06313	6.91931	5.66489	10.8937	6.575	0.725818	6.18114e-05	0.000228167
Bahd1	228536	43.1792	43.3068	42.639	40.5847	75.5297	78.7792	70.9913	65.2558	42.4274	72.639	-0.775295	4.72639e-18	1.23086e-16
Bai1	107831	0.752907	1.11504	4.87801	3.93786	3.40832	1.12126	1.56368	1.03283	2.67095	1.78152	0.576352	0.225423	0.31479
Bai2	230775	2.10814	2.05024	6.92503	5.10857	8.00634	2.28406	3.04919	1.75267	4.048	3.77306	0.0964913	0.818637	0.864464
Bai3	210933	0.639971	0.323722	3.74561	2.69619	1.12539	0.996679	0.860027	0.219084	1.85137	0.800295	1.20578	0.0318499	0.0595698
Baiap2	108100	62.6419	61.2194	47.3864	44.1678	109.131	92.9404	98.7467	102.563	53.8539	100.845	-0.904931	5.62724e-16	1.19305e-14
Baiap2l1	66898	7.3032	6.76219	6.4895	6.66952	7.20249	5.77244	6.21565	4.53818	6.8061	5.93219	0.198956	0.293976	0.390451
Baiap2l2	207495	2.18343	2.23008	1.35016	1.20619	2.70093	0.830566	1.17276	0.938933	1.74247	1.4108	0.297135	0.439894	0.537348
Bak1	12018	55.414	59.0972	74.4332	64.4602	62.7324	70.5981	78.1842	79.3085	63.3512	72.7058	-0.199232	0.0490888	0.0867665
Bambi	68010	18.4839	19.6751	13.5887	13.6938	13.3761	15.1994	12.744	11.9557	16.3604	13.3188	0.299175	0.0394935	0.0718796
Banf1	23825	18.9733	19.0636	20.9058	22.0307	23.9547	24.6678	26.739	27.8237	20.2433	25.7963	-0.350037	0.00199859	0.00518179
Bank1	242248	1.91991	1.90636	0.958181	1.02881	7.39542	13.912	16.8878	15.8993	1.45332	13.5236	-3.20851	6.08911e-25	2.9414e-23
Banp	53325	21.0814	18.9917	23.519	23.769	16.8165	16.7774	16.8878	14.1153	21.8403	16.1493	0.436136	0.000181391	0.000601229
Bap1	104416	78.6412	75.643	78.0917	78.1895	77.8769	77.8656	75.4869	73.9879	77.6413	76.3043	0.0251288	0.741086	0.804686
Bard1	12021	1.80698	2.05024	5.00867	6.31476	3.82632	4.77576	5.19925	5.88398	3.79516	4.92133	-0.37562	0.24599	0.337541
Basp1	70350	161.762	173.047	277.524	307.472	199.901	175.083	168.135	178.084	229.951	180.301	0.3508	0.0312984	0.058672
Batf	53314	1.50581	1.9783	2.52611	1.95119	4.11571	4.94187	4.61287	5.5397	1.99035	4.80254	-1.27343	2.64327e-07	1.59061e-06
Batf2	74481	0.865844	1.43876	1.39372	1.56095	0.64308	0.622925	1.09458	0.907635	1.31482	0.817055	0.684277	0.0305872	0.0575401
Batf3	381319	1.80698	1.83442	1.39372	1.73833	1.86493	1.32891	1.25095	0.938933	1.69336	1.34593	0.332564	0.236533	0.327446
Bax	12028	94.904	98.6991	83.0568	78.5797	87.1373	97.9653	109.888	97.336	88.8099	98.0816	-0.14275	0.131725	0.201073
Baz1a	217578	78.3024	78.4126	70.5134	75.919	165.4	163.788	177.283	149.04	75.7868	163.878	-1.11202	4.309e-39	5.89758e-37
Baz1b	22385	165.602	170.529	180.225	185.824	148.166	152.118	168.331	145.19	175.545	153.451	0.194229	0.0306868	0.0576835
Baz2a	116848	116.287	113.878	95.5567	95.4664	127.426	116.57	126.854	110.106	105.297	120.239	-0.191191	0.0466279	0.0830124
Baz2b	407823	109.586	109.418	119.947	122.677	137.201	136.005	156.486	125.973	115.407	138.916	-0.267298	0.00317236	0.00784839
Bbc3	170770	18.9733	23.7036	15.2873	14.4388	20.675	12.4585	12.3922	14.9916	18.1008	15.1293	0.257017	0.147675	0.221295
Bbip1	100503572	24.2436	22.6605	25.4789	27.565	23.2795	29.9004	25.0971	31.7672	24.987	27.5111	-0.138793	0.217644	0.306079
Bbs1	52028	7.41614	6.79815	8.14453	7.30809	5.17679	4.73423	5.12107	4.88245	7.41673	4.97863	0.572655	0.000797751	0.00226997
Bbs10	71769	14.6064	15.4667	12.7612	17.3833	18.9387	25.9137	24.5889	15.7741	15.0544	21.3038	-0.497226	0.0018577	0.00484505
Bbs12	241950	4.4798	4.10047	5.31355	4.78928	2.18647	2.201	2.15007	2.72291	4.67078	2.31511	1.0053	1.16833e-06	6.1713e-06
Bbs2	67378	10.8042	10.6828	6.18462	8.08857	4.24433	3.44685	3.63557	3.81833	8.94006	3.78627	1.23805	3.88037e-09	3.24057e-08
Bbs4	102774	9.86309	10.7907	11.3675	12.4521	9.83912	9.92527	10.3203	12.0183	11.1184	10.5258	0.0776022	0.566248	0.655549
Bbs5	72569	6.81381	6.40249	5.48776	6.95333	4.66233	4.60964	4.10467	5.94657	6.41435	4.8308	0.40694	0.0368664	0.0676982
Bbs7	71492	12.4983	12.4093	15.418	13.9421	11.0931	13.6213	15.1677	14.084	13.5669	13.4915	0.00811279	0.95344	0.965829
Bbs9	319845	16.3757	16.294	15.026	13.1971	11.0288	13.7459	12.3922	12.8008	15.2232	12.4919	0.286445	0.0338091	0.0627199
Bbx	70508	182.317	179.306	144.772	153.896	108.777	118.439	123.922	114.644	165.073	116.445	0.503876	2.59415e-08	1.86979e-07
BC002059	213811	5.53387	4.92776	4.74735	4.82476	4.53371	4.02825	5.4729	4.94505	5.00844	4.74498	0.0775065	0.697593	0.770392
BC003331	226499	76.6083	75.2473	68.7712	76.2738	60.0636	62.6247	66.3002	66.9772	74.2252	63.9914	0.214413	0.00874937	0.0192078
BC003965	214489	16.3381	16.3659	16.0277	16.5319	14.0834	13.2475	12.8222	13.7397	16.3159	13.4732	0.275238	0.0141883	0.0294873
BC004004	80748	67.1217	68.4132	61.9769	62.0124	51.7036	61.4619	61.101	66.0383	64.881	60.0762	0.111354	0.225884	0.315219
BC005537	79555	576.953	561.297	544.29	582.412	510.477	504.403	488.495	508.964	566.238	503.085	0.170612	0.0587166	0.101199
BC005561	100042165	24.5071	22.6965	22.1253	23.4498	26.8807	22.716	26.1917	21.3764	23.1947	24.2912	-0.06624	0.552004	0.642379
BC005624	227707	46.7932	48.3065	49.5641	48.5669	42.3146	47.3007	54.0644	47.6039	48.3077	47.8209	0.0152421	0.867531	0.900956
BC017158	233913	17.1663	17.9126	21.5155	19.7957	14.7908	17.6495	17.8651	17.871	19.0975	17.0441	0.163979	0.178274	0.258777
BC017643	217370	50.5201	43.6665	49.7383	49.7731	39.1635	36.7941	37.8803	39.8108	48.4245	38.4122	0.333146	8.33409e-05	0.000298689
BC021767	545551	18.5592	17.409	6.75082	6.1019	27.2344	33.0565	42.1804	31.5794	12.2052	33.5127	-1.45574	3.67907e-07	2.14577e-06
BC022687	217887	5.04448	5.32342	3.5714	3.79595	9.38896	6.85217	6.41111	7.29238	4.43381	7.48616	-0.755039	0.000409785	0.00125161
BC023829	236848	17.5427	16.7976	15.5922	15.8224	18.3921	19.809	16.966	20.0306	16.4387	18.7994	-0.193473	0.093721	0.150653
BC024978	414069	3.87747	5.25148	4.39892	4.15071	3.79417	6.43689	4.76924	3.88092	4.41965	4.7203	-0.0887836	0.69411	0.767785
BC026585	226527	9.07253	8.59661	6.09751	5.78262	6.36649	8.55483	7.66206	8.88856	7.38732	7.86799	-0.0892295	0.654173	0.732821
BC027231	212547	18.5592	18.632	17.9877	18.1283	21.4146	22.716	21.1488	22.4405	18.3268	21.93	-0.258585	0.0140717	0.0292598
BC028528	229600	25.1471	24.5669	19.6863	20.7181	17.5561	14.2027	14.9332	18.497	22.5296	16.2972	0.465012	0.00014004	0.000476393
BC029214	227622	7.86788	9.10018	7.31702	5.49881	7.2668	6.64453	6.09837	6.35345	7.44597	6.59079	0.175044	0.338004	0.436749
BC029722	613262	11.256	10.8267	9.58181	9.54309	9.45327	9.21928	9.65575	9.70231	10.3019	9.50765	0.115914	0.409642	0.508205
BC030336	233812	29.7775	26.1855	26.7855	27.494	26.1733	26.3289	24.4717	26.2275	27.5606	25.8004	0.0950192	0.320782	0.419023
BC030499	216976	2.4093	3.23722	2.83099	3.725	2.99032	2.4917	2.58008	1.84657	3.05063	2.47717	0.303323	0.220499	0.309211
BC030867	217216	1.16701	1.29489	2.22124	2.3769	3.66555	5.2741	6.02019	6.44734	1.76501	5.35179	-1.59989	7.21628e-08	4.73323e-07
BC031181	407819	62.416	61.5431	55.2696	56.4781	56.7518	59.0533	57.8954	61.594	58.9267	58.8236	0.00273429	0.973987	0.981075
BC037032	414066	0.828198	1.5107	1.52438	1.31262	1.35047	1.41196	1.60278	1.28321	1.29397	1.4121	-0.124912	0.710068	0.78053
BC037034	231807	41.5981	42.4795	64.9385	61.4093	25.2087	26.3289	26.3872	24.6	52.6063	25.6312	1.03703	5.73251e-16	1.2112e-14
BC046401	394191	1.16701	1.36682	1.74215	1.34809	1.15754	1.16279	0.938211	0.532062	1.40602	0.947652	0.571156	0.0909319	0.146821
BC048403	270802	3.2375	3.16528	3.09231	3.93786	2.73309	2.99004	2.26734	2.59771	3.35824	2.64705	0.344783	0.147368	0.220918
BC049352	408059	2.37166	1.9783	1.61149	1.20619	1.51124	1.53655	2.03279	1.3458	1.79191	1.60659	0.161176	0.592427	0.679471
BC049715	320135	2.03285	1.94233	1.35016	1.80929	1.12539	1.32891	1.44641	1.15802	1.78366	1.26468	0.503917	0.0793817	0.130655
BC051226	407803	2.48459	2.15814	2.26479	1.80929	0.932465	1.12126	0.977303	0.876337	2.1792	0.976843	1.159	9.26415e-06	4.0683e-05
BC052040	399568	3.83983	4.38823	4.52958	5.10857	2.34724	2.94851	4.4565	4.1939	4.46655	3.48654	0.357801	0.141781	0.213934
BC055324	381306	6.1362	5.89893	8.23164	9.0819	6.33433	6.06313	5.78563	8.91986	7.33717	6.77574	0.110862	0.573588	0.662614
BC065397	436230	1.39288	1.58264	1.7857	1.56095	1.22185	0.996679	1.17276	1.31451	1.58054	1.17645	0.416134	0.134776	0.205162
BC068281	238037	6.58794	6.79815	6.35883	5.64071	3.15109	3.11462	2.54099	3.28626	6.34641	3.02324	1.06608	4.20387e-07	2.42431e-06
BC100451	58251	6.17384	6.87009	4.22471	4.43452	9.26035	6.72759	9.85121	6.72902	5.42579	8.14204	-0.583267	0.00754279	0.0168686
BC106179	320099	1.95756	1.83442	2.52611	2.235	1.28616	1.82725	1.72005	2.09695	2.13827	1.7326	0.300709	0.27425	0.368841
Bcan	12032	3.61396	2.51784	6.27173	5.88905	14.2121	4.19436	5.19925	3.78703	4.57314	6.84818	-0.585725	0.0972462	0.155508
Bcap29	12033	15.8111	13.3086	12.2821	13.6583	11.7362	11.3788	11.2976	12.3313	13.765	11.686	0.236036	0.0564183	0.0977166
Bcap31	27061	139.627	138.121	128.309	132.22	118.616	120.64	103.985	130.386	134.569	118.407	0.184368	0.0309746	0.0581447
Bcar1	12927	6.58794	8.23692	4.05049	3.79595	7.90988	3.36379	3.9483	4.10001	5.66782	4.8305	0.228248	0.442852	0.540264
Bcar3	29815	41.7487	42.3356	67.9873	71.4845	107.523	129.817	134.751	131.075	55.889	125.791	-1.17056	1.7513e-15	3.51345e-14
Bcas1	76960	8.05611	7.66141	4.66024	4.68286	29.646	6.27077	9.14756	6.44734	6.26515	12.8779	-1.03973	0.0048455	0.0114211
Bcas2	68183	48.299	47.8748	47.909	51.6888	46.977	50.1662	50.1943	54.5207	48.9429	50.4645	-0.0441119	0.597992	0.68388
Bcas3	192197	33.0903	36.5805	35.2349	34.4119	29.0672	32.6828	31.5473	26.5718	34.8294	29.9673	0.218398	0.0352512	0.0650134
Bcat1	12035	5.00683	3.59691	4.92156	4.50547	6.0771	1.53655	1.4855	1.22061	4.5077	2.57994	0.797558	0.0406531	0.0736743
Bcat2	12036	30.3045	31.7607	26.6113	24.5495	16.7844	17.9402	16.9269	20.6252	28.3065	18.0692	0.646778	2.40437e-08	1.74423e-07
Bccip	66165	28.5352	30.3219	30.0956	31.0771	31.4466	33.8456	35.1047	31.6733	30.0075	33.0176	-0.136696	0.118239	0.183597
Bcdin3d	75284	3.12457	5.10761	4.44247	4.71833	3.2154	2.99004	2.81463	2.59771	4.34824	2.90445	0.582454	0.00788367	0.0175354
Bckdha	12039	48.4872	49.5294	47.4735	37.0371	39.4208	38.829	38.7403	39.6856	45.6318	39.1689	0.219717	0.0263826	0.0506044
Bckdhb	12040	3.95276	4.31629	3.26652	3.29928	3.2154	3.19768	2.971	3.84962	3.70872	3.30843	0.163341	0.455058	0.551279
Bckdk	12041	62.0772	61.2913	61.3236	57.7907	45.723	52.5748	51.758	56.8993	60.6207	51.7388	0.228484	0.00848427	0.0187014
Bcl10	12042	81.0128	84.887	70.6876	74.3226	107.619	106.686	96.8703	113.486	77.7275	106.165	-0.449715	3.28915e-07	1.93578e-06
Bcl11a	14025	0.112936	0.107907	3.83272	4.00881	0.16077	0.415283	0.351829	0.375573	2.01559	0.325864	2.61518	0.000742623	0.00213082
Bcl2	12043	24.3189	24.2072	27.7872	32.1059	26.1733	22.7575	20.5625	20.7504	27.1048	22.5609	0.264157	0.0195212	0.0388343
Bcl2a1a	12044	2.29637	2.26605	0.304876	0.248333	1.63985	1.45349	1.05549	1.12672	1.27891	1.31889	-0.0401461	0.936756	0.952924
Bcl2a1b	12045	206.071	202.038	250.172	244.928	221.702	283.306	252.496	260.053	225.802	254.389	-0.171937	0.103878	0.16466
Bcl2a1d	12047	19.1238	19.6031	7.75255	8.83357	16.1413	22.4668	20.9534	19.4672	13.8283	19.7572	-0.512716	0.025966	0.0498673
Bcl2l1	12048	86.622	87.6926	157.708	149.922	193.278	268.356	271.26	215.391	120.486	237.071	-0.976485	1.57472e-08	1.18711e-07
Bcl2l11	12125	168.275	171.86	183.622	180.68	144.339	132.849	119.309	129.228	176.109	131.431	0.421886	1.42997e-06	7.42911e-06
Bcl2l12	75736	6.51265	7.62544	7.49123	8.44333	5.88418	6.35383	6.29383	6.85421	7.51816	6.34651	0.244608	0.121835	0.188089
Bcl2l13	94044	31.4339	32.9836	43.5101	39.5559	31.2537	33.3888	38.0366	35.0535	36.8709	34.4331	0.098132	0.361393	0.461024
Bcl2l2	12050	32.7138	35.4655	29.5294	27.8133	24.6943	21.5532	21.6179	20.813	31.3805	22.1696	0.500965	1.10053e-06	5.85589e-06
Bcl3	12051	20.5167	19.4952	10.1916	9.61404	46.9448	42.5665	50.2725	39.5917	14.9544	44.8439	-1.58291	2.40914e-15	4.7787e-14
Bcl6	12053	73.4461	71.7583	139.067	130.73	126.237	115.49	121.459	108.196	103.75	117.846	-0.184026	0.262613	0.355989
Bcl6b	12029	1.91991	0.755351	1.00173	1.41905	12.2507	10.7558	10.6331	9.07635	1.27401	10.679	-3.05984	1.85843e-29	1.29334e-27
Bcl7a	77045	16.0369	16.3659	14.9825	15.0419	16.2699	18.2725	19.116	16.2748	15.6068	17.4833	-0.161893	0.203336	0.288792
Bcl7b	12054	26.4271	27.2286	24.5643	21.9598	27.6524	28.0316	33.6192	28.7939	25.0449	29.5243	-0.236797	0.0295817	0.0559048
Bcl7c	12055	8.28198	9.24405	8.3623	9.01095	11.1253	11.9602	11.454	11.455	8.72482	11.4986	-0.396683	0.00603112	0.0138733
Bcl9	77578	14.9829	16.1501	16.9859	15.645	15.7876	14.4103	16.145	11.8306	15.941	14.5434	0.132995	0.331809	0.430416
Bcl9l	80288	12.7618	12.5892	11.6724	9.54309	21.8969	19.8921	22.087	18.6848	11.6416	20.6402	-0.826103	1.55015e-08	1.17002e-07
Bclaf1	72567	251.735	242	243.901	261.885	245.399	245.515	283.77	257.08	249.88	257.941	-0.0457253	0.61277	0.696641
Bco2	170752	5.94797	5.68311	5.83619	5.25047	4.69448	4.6927	4.33923	4.2565	5.67944	4.49573	0.336718	0.0498484	0.08792
Bcor	71458	73.4838	72.4057	50.9142	46.935	166.558	167.068	182.638	162.248	60.9347	169.628	-1.47659	8.22818e-32	6.94211e-30
Bcorl1	320376	15.6981	16.0062	12.6306	12.5586	28.9064	23.1728	24.1198	19.9993	14.2234	24.0496	-0.756959	2.68552e-07	1.61288e-06
Bcr	110279	16.9028	14.8912	14.7211	14.5452	19.1959	15.6146	16.7314	15.2733	15.2651	16.7038	-0.130503	0.319661	0.418002
Bcs1l	66821	8.99724	9.9994	8.31875	6.98881	6.10926	8.84553	8.9521	8.13742	8.57605	8.01108	0.101054	0.562951	0.652653
Bdp1	544971	106.423	102.224	112.848	123.918	127.973	117.525	133.656	113.454	111.353	123.152	-0.145187	0.101405	0.161216
Becn1	56208	91.7418	89.599	92.5515	91.4221	95.8832	90.3656	92.5311	91.4834	91.3286	92.5658	-0.0196392	0.796097	0.846906
Bend3	331623	24.3189	26.5452	12.9354	12.6295	56.1087	58.9287	57.8954	53.5192	19.1073	56.613	-1.56567	2.51909e-16	5.52137e-15
Bend4	666938	39.3018	36.4367	50.9578	53.2497	56.4624	62.0018	58.7164	64.0352	44.9865	60.3039	-0.423156	0.000193933	0.000638905
Bend6	320705	4.14099	3.9566	2.9181	2.30595	2.28293	2.45017	1.68096	2.25344	3.33041	2.16688	0.618652	0.0183055	0.0367122
Best1	24115	11.2183	9.10018	4.66024	6.31476	11.3182	10.3821	8.56117	8.70078	7.82337	9.74056	-0.314075	0.162284	0.239606
Bet1	12068	35.0102	33.9908	26.0886	25.7557	27.5238	33.5964	29.7882	34.052	30.2113	31.2401	-0.0474747	0.695038	0.768535
Bet1l	54399	24.3189	25.4301	20.5138	19.3345	25.6589	22.0515	23.2598	21.4077	22.3993	23.0945	-0.0439413	0.70845	0.779377
Bex2	12069	0.564681	0.431629	2.70033	2.02214	1.80062	1.12126	1.72005	0.500764	1.42969	1.28568	0.148295	0.749293	0.81084
Bfar	67118	55.9787	57.3707	48.1704	50.8374	36.5591	36.9187	39.7176	39.5917	53.0893	38.1968	0.475377	6.86837e-08	4.52673e-07
Bgn	12111	30.1163	27.8401	9.79957	9.89785	8.74588	0.996679	1.0164	1.12672	19.4134	2.97142	2.7026	2.88402e-05	0.000114894
Bhlha15	17341	1.46817	1.90636	1.17595	1.31262	1.80062	1.86877	2.30644	1.18931	1.46577	1.79129	-0.278517	0.361592	0.461181
Bhlhb9	70237	3.46337	2.98543	4.52958	6.20833	5.75556	4.94187	4.65196	5.47711	4.29668	5.20663	-0.278349	0.226739	0.316162
Bhlhe40	20893	45.9274	41.5083	14.8082	16.1062	143.246	130.897	136.08	145.535	29.5875	138.939	-2.23071	9.58828e-18	2.43022e-16
Bhlhe41	79362	110	111.9	104.18	104.939	73.8898	83.0981	80.9207	79.8719	107.755	79.4451	0.440213	3.88461e-08	2.69278e-07
Bicd1	12121	1.27994	1.79845	3.35363	4.00881	3.05463	1.45349	1.13367	1.18931	2.61021	1.70778	0.60418	0.101187	0.160952
Bicd2	76895	99.4967	103.771	106.968	104.939	104.179	87.0018	95.3066	84.2536	103.793	92.6852	0.163068	0.0638585	0.108618
Bid	12122	28.4223	30.3219	36.4109	35.2278	30.2569	43.8954	39.6003	43.9734	32.5957	39.4315	-0.274454	0.01824	0.0365928
Bik	12124	1.95756	2.08621	3.31008	3.90238	2.18647	1.24585	1.72005	2.59771	2.81406	1.93752	0.525805	0.0586469	0.101093
Bin1	30948	128.258	131.863	104.05	103.626	180.352	196.346	194.757	204.406	116.949	193.965	-0.729671	1.42839e-13	2.25866e-12
Bin2	668218	101.304	97.2244	115.069	110.721	87.2016	81.4785	79.6697	86.0062	106.08	83.589	0.343098	4.46159e-05	0.000170359
Bin3	57784	36.5913	36.9043	44.0328	43.5647	32.8614	36.1296	40.5385	40.5932	40.2733	37.5307	0.101404	0.310629	0.408272
Birc2	11797	42.2381	39.3502	34.7558	36.505	27.3952	31.9353	31.0782	29.013	38.2123	29.8554	0.357863	0.00015253	0.000514192
Birc3	11796	51.1977	49.2057	35.9318	39.5559	70.7388	80.9802	83.2662	72.0474	43.9728	76.7582	-0.802442	4.28431e-13	6.29763e-12
Birc5	11799	4.96919	5.4673	8.79784	9.79143	14.6944	22.1346	22.0089	25.1321	7.25644	20.9925	-1.53263	9.68819e-13	1.35922e-11
Birc6	12211	396.745	388.466	403.22	430.539	339.771	349.045	329.898	334.479	404.742	338.299	0.258731	0.00492989	0.011578
Bivm	246229	23.3401	24.0273	21.1235	20.9664	11.6076	13.5382	12.5877	14.8977	22.3644	13.1578	0.765155	2.23613e-10	2.28397e-09
Blcap	53619	44.3839	43.5585	39.5032	38.3852	47.5557	44.8506	47.536	42.9092	41.4577	45.7129	-0.140551	0.110662	0.173691
Blm	12144	9.41134	9.5318	12.8919	12.9133	8.64942	10.5482	12.1186	13.1138	11.1871	11.1075	0.00936466	0.955692	0.967314
Blmh	104184	61.8137	59.6367	72.212	75.2095	71.7034	77.6164	74.7832	83.4085	67.218	76.8779	-0.19403	0.0405533	0.073526
Blnk	17060	173.733	175.781	159.581	160.423	128.101	137.251	137.956	126.318	167.38	132.407	0.338481	7.43284e-05	0.000269763
Bloc1s1	14533	18.9356	19.4233	21.1671	17.809	19.0995	23.1313	19.7024	24.8191	19.3338	21.6881	-0.166846	0.168982	0.247859
Bloc1s2	73689	10.6913	10.503	12.4563	10.7848	10.5787	11.3788	10.3203	12.8634	11.1088	11.2853	-0.0254534	0.851141	0.88956
Bloc1s3	232946	14.3052	15.0351	14.634	13.6583	8.16711	9.30234	8.56117	9.20154	14.4082	8.80804	0.710186	2.3149e-08	1.68628e-07
Bloc1s4	117197	9.07253	9.38793	9.05916	9.36571	11.286	9.88374	8.52208	12.9886	9.22133	10.6701	-0.21346	0.172845	0.252353
Bloc1s5	17828	14.9076	16.4738	16.3762	14.3324	14.3407	15.1163	13.2522	15.8993	15.5225	14.6521	0.0818172	0.499494	0.593248
Bloc1s6	18457	31.5092	30.5737	39.0676	40.7976	22.0576	23.5881	24.2762	27.4794	35.487	24.3503	0.542319	1.28628e-06	6.74515e-06
Blvra	109778	71.5639	70.931	67.0726	69.2495	83.8576	117.193	110.083	121.811	69.7043	108.236	-0.634454	9.43612e-10	8.66772e-09
Blvrb	233016	133.528	134.812	132.664	125.869	98.1018	111.504	133.382	104.503	131.719	111.873	0.236021	0.0180131	0.0362143
Blzf1	66352	17.7686	19.0996	15.8535	16.7802	19.7747	20.4735	22.5952	22.4718	17.3755	21.3288	-0.29477	0.0122839	0.0260077
Bmf	171543	56.6939	53.2342	32.6217	31.8221	27.2666	22.9652	22.3998	24.8817	43.593	24.3783	0.838134	1.52402e-07	9.49564e-07
Bmi1	12151	75.2907	72.4777	55.7487	58.0745	77.9734	77.9071	73.7668	78.4635	65.3979	77.0277	-0.235754	0.01757	0.0354857
Bmp1	12153	15.397	15.7904	7.36057	6.45666	11.5111	5.31562	5.23834	4.85115	11.2512	6.72906	0.739895	0.015222	0.0313134
Bmp2	12156	24.733	24.4949	42.2906	43.8131	29.8389	52.3257	45.5423	50.2955	33.8329	44.5006	-0.395346	0.0351985	0.0649355
Bmp2k	140780	250.078	249.338	242.463	257.131	247.875	277.534	258.985	268.597	249.753	263.248	-0.0758063	0.390291	0.489186
Bmp7	12162	1.54346	2.23008	2.43901	2.80262	1.44693	0.996679	0.74275	0.657253	2.25379	0.960903	1.22297	0.000315818	0.000987873
Bmpr1a	12166	85.9444	85.8941	94.6857	104.584	88.5842	94.4769	88.6609	94.8635	92.777	91.6464	0.0177238	0.835533	0.876976
Bmpr2	12168	78.1894	78.4845	67.6388	69.2495	91.9925	97.1347	103.125	91.8902	73.3906	96.0356	-0.387376	2.62029e-05	0.000105136
Bms1	213895	67.1593	63.5214	72.1249	76.9124	66.3337	69.8091	82.2107	70.5452	69.9295	72.2247	-0.0462466	0.612369	0.696249
Bmyc	107771	2.86105	2.87753	5.22644	3.68952	2.57232	3.86213	3.32283	3.00459	3.66363	3.19047	0.198866	0.419717	0.517784
Bnip1	224630	12.95	14.4236	16.6375	16.4964	13.6976	13.7874	13.9559	15.2733	15.1269	14.1785	0.0918774	0.456691	0.552714
Bnip2	12175	175.804	172.508	184.101	187.988	186.879	192.442	185.844	204.656	180.1	192.455	-0.0958252	0.271128	0.36552
Bnip3	12176	43.7816	41.1846	33.7976	35.9728	43.1185	36.0881	29.1627	38.7466	38.6842	36.779	0.0721504	0.549191	0.639952
Bnip3l	12177	174.223	170.601	153.091	159.998	140.674	123.214	119.778	130.95	164.478	128.654	0.354172	5.06685e-05	0.000190925
Bod1	69556	10.2019	10.9346	12.1515	12.3457	14.0834	14.8256	14.6595	15.4298	11.4084	14.7496	-0.37103	0.00323541	0.00797394
Bod1l	665775	139.062	132.258	142.638	155.563	116.622	120.598	145.384	117.961	142.38	125.141	0.186511	0.0398127	0.0723644
Bola1	69168	7.19027	8.99227	6.83793	7.5919	3.89063	5.2741	4.33923	5.6023	7.65309	4.77656	0.681375	0.000132879	0.000454542
Bola2	66162	31.6598	29.7464	25.4789	24.4786	24.8229	22.3422	25.6444	23.0977	27.8409	23.9768	0.215787	0.0379007	0.0692981
Bola3	78653	14.1547	13.1647	11.1062	12.9133	12.2828	13.6628	11.8449	14.9603	12.8347	13.1877	-0.0385569	0.771211	0.827506
Bop1	12181	36.6289	35.2857	39.6338	39.4495	39.3565	38.0399	39.444	37.4008	37.7495	38.5603	-0.0309747	0.720294	0.788534
Bora	77744	4.66803	4.71195	7.66544	8.3369	6.0771	4.90034	6.13746	5.66489	6.34558	5.69495	0.153739	0.483068	0.57833
Bpgm	12183	9.52428	9.13614	11.1497	10.3945	11.6719	8.30566	8.9521	8.85727	10.0512	9.44673	0.0859871	0.580002	0.668457
Bphl	68021	24.8459	25.0704	24.782	21.8533	16.913	24.5017	17.6696	23.5046	24.1379	20.6472	0.225683	0.086114	0.140089
Bpnt1	23827	30.681	31.1492	29.9214	29.5517	32.2183	30.9386	33.3847	35.8985	30.3258	33.11	-0.127456	0.165288	0.243353
Bptf	207165	155.927	159.667	166.549	175.926	195.625	188.165	209.182	167.725	164.517	190.174	-0.208917	0.0285921	0.0542761
Braf	109880	126.187	126.611	85.2781	93.6571	100.771	99.2111	100.389	94.175	107.933	98.6363	0.130347	0.248437	0.340482
Brap	72399	96.7486	98.1596	80.6614	76.1319	99.0986	96.5949	101.444	96.6162	87.9254	98.4384	-0.162716	0.0775674	0.128063
Brat1	231841	25.1848	28.1638	31.228	26.004	20.0962	18.1894	19.2333	20.0932	27.6451	19.403	0.508418	1.37668e-06	7.18253e-06
Brca1	12189	12.6112	12.5172	17.465	21.9952	17.1059	17.5665	20.0934	24.1306	16.1472	19.7241	-0.289346	0.0945116	0.151726
Brca2	12190	14.9076	14.7114	22.1253	25.5074	11.2539	13.912	14.3077	16.8382	19.3129	14.0779	0.45554	0.0131282	0.0275304
Brcc3	210766	34.0691	34.4943	32.8395	36.3276	31.318	33.9286	32.4856	33.4573	34.4326	32.7974	0.0711155	0.411793	0.510247
Brd1	223770	118.846	120.712	105.095	102.526	156.622	151.952	156.017	139.15	111.795	150.935	-0.432796	4.78931e-07	2.72871e-06
Brd2	14312	286.67	292.932	268.073	272.209	371.411	334.303	354.136	317.046	279.971	344.224	-0.298024	0.00119674	0.00327807
Brd3	67382	34.5585	33.5951	36.3238	37.6047	32.7971	36.2542	37.2548	31.5168	35.5205	34.4557	0.0452073	0.627399	0.708758
Brd4	57261	50.8589	51.4717	55.0083	53.3207	71.4461	71.6363	71.304	59.6848	52.6649	68.5178	-0.379341	0.000135656	0.000463526
Brd7	26992	65.39	60.5359	68.989	73.3647	60.7389	65.241	74.5096	59.6222	67.0699	65.0279	0.0452558	0.629573	0.710856
Brd8	78656	84.928	84.2036	86.5847	95.7857	87.6839	86.3374	95.4239	83.4398	87.8755	88.2212	-0.0052799	0.949447	0.963126
Brd9	105246	34.7467	35.4295	32.5781	35.8664	37.7488	41.5698	43.0795	41.3443	34.6552	40.9356	-0.238964	0.00555001	0.0128772
Brdt	114642	1.54346	1.33086	0.914627	1.49	1.25401	1.20432	0.860027	1.15802	1.31974	1.11909	0.239643	0.456092	0.552152
Bre	107976	45.9274	47.6231	46.5589	43.6002	28.8421	29.8173	32.7592	32.4245	45.9274	30.9608	0.568726	5.22993e-11	5.954e-10
Brf1	72308	31.6221	31.5449	34.0154	32.5671	35.08	30.6064	34.1274	28.8878	32.4374	32.1754	0.0113368	0.901157	0.927174
Brf2	66653	8.01846	6.79815	7.709	7.45	6.81664	9.21928	8.48299	9.04505	7.4939	8.39099	-0.162025	0.31002	0.407733
Bri3	55950	28.0082	31.4729	16.8117	17.0286	24.9836	29.402	27.6772	30.9535	23.3303	28.2541	-0.275236	0.107558	0.169685
Bri3bp	76809	35.6125	34.5303	28.3534	29.7645	30.1926	28.1562	27.0908	26.1336	32.0652	27.8933	0.201736	0.0443937	0.0795405
Brinp1	56710	0.639971	1.0431	2.56967	3.08643	3.15109	1.74419	1.72005	1.06412	1.83479	1.91986	-0.0684691	0.867354	0.900924
Brinp2	240843	0.188227	0.251784	4.31181	3.83143	1.12539	0.581396	1.05549	0.594657	2.14581	0.839233	1.34604	0.0366468	0.0673352
Brinp3	215378	0.376454	0.323722	1.1324	0.815952	1.67201	0.872095	0.625474	0.312978	0.662131	0.870638	-0.405861	0.390362	0.489214
Brip1	237911	6.28678	7.33769	12.0644	13.8712	11.6719	14.5349	13.6432	16.0245	9.89	13.9686	-0.498618	0.016102	0.0328765
Brix1	67832	15.5099	15.5746	16.5068	17.8445	24.1798	24.0034	23.1816	23.5359	16.359	23.7252	-0.536143	9.27862e-07	5.01509e-06
Brk1	101314	134.507	133.301	119.119	119.839	137.362	154.112	148.472	161.747	126.692	150.423	-0.247552	0.00515193	0.0120512
Brms1	107392	30.4551	27.1926	29.66	28.31	30.2891	27.9901	34.9874	29.2634	28.9044	30.6325	-0.0838694	0.389384	0.488484
Brms1l	52592	17.2792	16.258	17.465	14.9355	11.9613	10.9219	10.5549	11.5802	16.4844	11.2546	0.547899	7.05645e-06	3.16308e-05
Brox	71678	154.497	156.429	157.926	171.456	182.088	179.112	178.221	191.73	160.077	182.788	-0.191446	0.0284497	0.0540307
Brpf1	78783	91.2147	95.2461	103.266	95.7857	127.683	114.909	124.43	115.833	96.3781	120.714	-0.325163	6.01662e-05	0.000222963
Brpf3	268936	24.1307	23.8115	20.8187	18.625	29.4852	21.3456	24.1589	19.9367	21.8465	23.7316	-0.11983	0.397564	0.495995
Brsk1	381979	1.50581	1.90636	2.30834	2.12857	1.67201	0.74751	0.781842	0.500764	1.96227	0.925531	1.07179	0.00270593	0.00681072
Brsk2	75770	1.91991	2.4459	2.65677	3.29928	5.2411	3.57143	3.83103	2.22214	2.58047	3.71643	-0.524591	0.0646768	0.109797
Brwd1	93871	114.103	115.605	104.572	115.404	147.812	140.698	138.034	130.762	112.421	139.327	-0.309254	0.000141683	0.000480786
Brwd3	382236	25.1848	23.8115	27.4824	29.4807	26.8486	31.3123	32.3292	26.3527	26.4898	29.2107	-0.139639	0.212091	0.299466
Bscl2	14705	49.5037	47.659	35.3656	31.7867	39.678	42.9818	41.6331	44.3802	41.0787	42.1683	-0.0373788	0.761125	0.819927
Bsdc1	100383	62.1525	58.8814	65.2434	64.6021	63.6006	61.4204	60.8664	58.6207	62.7198	61.127	0.0369081	0.648232	0.727092
Bsg	12215	223.086	227.576	215.808	198.738	227.811	221.678	219.268	239.271	216.302	227.007	-0.0698077	0.435148	0.53303
Bsn	12217	0.97878	1.00713	2.78743	2.41238	1.86493	1.82725	1.83733	1.47099	1.79643	1.75013	0.0335386	0.921451	0.941398
Bst1	12182	2.74811	1.79845	2.04702	2.19952	2.18647	1.9103	1.9937	2.87939	2.19828	2.24247	-0.0335361	0.904938	0.930081
Bst2	69550	171.249	171.465	135.016	127.289	271.83	290.947	272.707	297.11	151.255	283.148	-0.904458	2.71738e-16	5.93488e-15
Btaf1	107182	190.071	182.435	178.396	193.097	185.175	219.062	217.274	204.656	186	206.542	-0.150854	0.0988358	0.157784
Btbd1	83962	73.8226	74.5999	73.7364	75.6352	55.7872	57.8074	58.4427	64.7864	74.4485	59.2059	0.330179	5.29524e-05	0.000198801
Btbd10	68815	31.2457	28.9911	28.5276	30.7224	48.0702	48.2144	51.0152	57.0558	29.8717	51.0889	-0.774325	1.3356e-17	3.32363e-16
Btbd19	78611	6.39971	5.75505	6.31528	7.13071	9.83912	10.9219	11.6885	10.1092	6.40019	10.6397	-0.730833	1.16592e-06	6.16388e-06
Btbd2	208198	30.2669	29.7105	36.2366	27.7069	19.839	23.6296	22.9471	20.3748	30.9802	21.6976	0.514174	6.54051e-06	2.95655e-05
Btbd3	228662	10.7666	11.3662	11.324	11.7071	9.16388	8.72095	7.11477	8.91986	11.291	8.47986	0.411025	0.00358608	0.00872818
Btbd6	399566	15.284	19.0636	17.2037	15.3612	12.5722	12.4585	12.744	14.1153	16.7281	12.9725	0.365462	0.00289198	0.00722584
Btbd7	238386	53.4564	55.0687	50.5222	50.9438	84.1148	80.648	82.2889	79.7154	52.4978	81.6918	-0.63766	9.66726e-16	1.98469e-14
Btbd8	100503185	2.14579	2.12218	1.95991	1.66738	1.38262	1.12126	1.36822	0.970231	1.97381	1.21059	0.704167	0.0118233	0.025138
Btbd9	224671	55.941	54.9607	54.1372	52.8595	50.5139	51.5366	51.0152	49.9825	54.4746	50.7621	0.102036	0.194791	0.279068
Btd	26363	11.4818	12.3374	9.53825	8.40785	13.0867	9.42693	10.7894	11.2672	10.4413	11.1426	-0.0954012	0.551172	0.641714
Btf3	218490	171.625	170.745	149.52	154.57	170.448	194.685	175.524	216.142	161.615	189.2	-0.22731	0.0218389	0.0429251
Btf3l4	70533	21.0061	20.4304	20.8622	21.6759	23.183	26.2044	25.2144	26.0084	20.9937	25.1526	-0.260047	0.0111234	0.0237713
Btg1	12226	166.204	170.134	124.563	130.907	160.545	144.768	139.559	143.719	147.952	147.148	0.00796865	0.938922	0.954655
Btg2	12227	49.4284	50.7524	29.5729	28.8067	56.3981	57.0599	55.6281	48.4489	39.6401	54.3838	-0.455411	0.00303669	0.00754912
Btk	12229	49.6542	46.9756	58.0135	64.1409	49.4207	50.7476	51.9534	47.6352	54.6961	49.9392	0.131464	0.181745	0.263009
Btrc	12234	18.5592	18.6679	19.5991	19.6538	16.495	15.2824	14.855	13.4893	19.12	15.0304	0.347221	0.00264178	0.00666721
Bub1	12235	9.07253	6.978	14.2856	15.645	17.4275	23.3389	23.5725	28.5123	11.4953	23.2128	-1.01453	1.5724e-06	8.11429e-06
Bub1b	12236	14.757	12.841	23.3883	26.3233	21.5753	27.4087	28.4591	34.9283	19.3274	28.0928	-0.540107	0.00472449	0.0111701
Bub3	12237	68.5146	67.5139	78.5708	71.0943	70.16	81.5201	74.1187	81.4368	71.4234	76.8089	-0.105171	0.222143	0.310986
Bud13	215051	13.2888	14.8552	14.634	15.7159	16.3664	16.6113	23.2207	17.7458	14.6235	18.4861	-0.336814	0.0129843	0.0272751
Bud31	231889	39.5276	40.2854	40.592	43.7421	48.3917	55.8971	51.9143	57.4314	41.0368	53.4086	-0.379763	2.22212e-05	9.03069e-05
Bysl	53414	11.5948	11.2583	15.9406	13.1617	13.6976	14.618	15.6368	14.2092	12.9888	14.5404	-0.164298	0.216383	0.304617
Bzrap1	207777	3.95276	4.71195	3.83272	3.90238	5.2411	3.61296	5.00379	3.69314	4.09995	4.38775	-0.0977208	0.655563	0.734245
Bzw1	66882	258.963	255.237	266.331	273.273	372.375	407.144	355.504	432.504	263.451	391.882	-0.572921	1.72248e-09	1.51879e-08
Bzw2	66912	13.4018	14.1718	18.7281	18.4831	19.839	23.2143	22.1261	25.0382	16.1962	22.5544	-0.47859	0.000443239	0.00133987
C030005K06Rik	78695	2.29637	2.80559	2.78743	2.80262	3.85848	4.06977	4.69105	3.28626	2.673	3.97639	-0.569158	0.0122531	0.0259469
C030006K11Rik	223665	5.87268	6.0428	6.40239	5.49881	4.72664	5.19104	4.22195	5.571	5.95417	4.92766	0.270243	0.137157	0.208194
C030013D06Rik	77376	2.48459	2.48187	2.22124	2.19952	2.7974	2.03489	2.65826	1.4084	2.34681	2.22474	0.0792401	0.782493	0.836163
C030014I23Rik	77381	3.99041	3.41706	3.31008	4.29262	2.37939	2.40864	2.69736	3.53665	3.75254	2.75551	0.442842	0.0679055	0.114458
C030034I22Rik	77533	1.84462	1.29489	1.08884	0.745	0.836004	1.37043	0.469105	0.782444	1.24334	0.864497	0.528471	0.15756	0.233946
C030034L19Rik	320088	2.8234	1.87039	2.74388	2.30595	1.41478	1.16279	1.13367	1.00153	2.43591	1.17819	1.04109	0.000126855	0.000437214
C030037D09Rik	193280	2.0705	1.94233	1.82925	2.19952	0.836004	1.16279	1.32913	0.751146	2.0104	1.01977	0.991219	0.000920013	0.00257972
C030039L03Rik	112415	1.43052	1.58264	2.13413	2.16405	0.996773	1.03821	0.703658	1.31451	1.82783	1.01329	0.838254	0.00565388	0.0130837
C130026I21Rik	620078	2.52224	3.27319	1.65504	1.84476	1.1897	0.913623	1.17276	0.657253	2.32381	0.983334	1.24302	0.000160904	0.00053903
C130050O18Rik	319772	14.5688	13.92	13.6759	12.3102	13.7619	13.5798	13.4086	17.3077	13.6187	14.5145	-0.0940821	0.479934	0.575248
C130071C03Rik	320203	0.790553	0.539536	6.53305	7.41452	1.80062	1.95183	1.9937	0.970231	3.81941	1.6791	1.18453	0.0308955	0.0580404
C1d	57316	38.3606	35.3576	36.7593	40.2655	43.6651	51.3705	48.9433	55.2718	37.6857	49.8127	-0.40218	2.17303e-05	8.84874e-05
C1galt1	94192	38.323	38.4869	34.4945	36.1502	41.4465	49.211	46.2851	57.9009	36.8637	48.7109	-0.401918	7.70081e-05	0.000278504
C1galt1c1	59048	24.206	23.0921	23.127	25.4364	17.8455	19.9751	20.3279	23.6924	23.9654	20.4602	0.227836	0.0404013	0.0732936
C1qa	12259	1467.64	1546.49	1711.4	1587.74	2954.82	2501.33	2958.92	2460.44	1578.32	2718.88	-0.784636	5.59901e-14	9.34533e-13
C1qb	12260	1376.65	1385.71	1456.43	1348.95	2072.68	1933.93	2095.38	1964.18	1391.94	2016.54	-0.534803	5.60944e-09	4.5669e-08
C1qbp	12261	29.8151	28.0559	23.8239	24.9043	31.4787	35.0914	36.3948	37.4008	26.6498	35.0914	-0.396052	0.00019559	0.000643846
C1qc	12262	1972.39	2070.42	2317.53	2046.37	2977.97	2929.61	3162.01	2778.33	2101.68	2961.98	-0.495027	2.77417e-07	1.65804e-06
C1ra	50909	10.3901	9.85553	4.39892	5.17952	5.11248	3.90366	5.12107	4.28779	7.45602	4.60625	0.695253	0.00845025	0.0186408
C1rl	232371	1.76933	1.72652	1.2195	1.17071	4.0514	3.19768	3.83103	2.7542	1.47152	3.45858	-1.22747	1.2059e-05	5.16312e-05
C2	12263	10.0137	12.3374	12.587	13.2326	22.7972	27.4502	20.9925	25.9145	12.0427	24.2886	-1.01164	2.71915e-14	4.70732e-13
C230052I12Rik	101831	5.08213	5.71908	7.62189	6.31476	6.94526	7.10134	7.11477	6.9481	6.18446	7.02737	-0.186767	0.271274	0.365649
C2cd2	207781	21.4579	22.2649	19.5556	18.4831	22.2827	23.3389	23.1816	26.1649	20.4404	23.742	-0.216221	0.0569206	0.0985034
C2cd2l	71764	32.8644	33.703	31.9684	28.7002	39.9996	38.829	36.8639	42.8153	31.809	39.6269	-0.317994	0.000751846	0.00215428
C2cd3	277939	40.5064	41.7241	47.1686	46.7576	31.4787	31.9768	33.2283	30.9848	44.0392	31.9172	0.464471	3.77258e-07	2.19305e-06
C2cd5	74741	14.0794	14.1358	15.3309	13.8002	12.8294	15.9053	15.0114	15.242	14.3366	14.747	-0.0402225	0.753253	0.813767
C3	12266	74.839	71.7583	43.2488	41.2943	35.6588	22.5499	25.8008	18.5596	57.7851	25.6423	1.17191	6.95921e-10	6.52386e-09
C330006A16Rik	109299	39.2641	39.2782	31.0102	31.4674	23.601	28.613	30.7655	30.0146	35.255	28.2485	0.320854	0.0047418	0.0112003
C330006D17Rik	77616	1.12936	1.00713	0.82752	0.851428	0.739542	0.789038	0.430013	0.876337	0.953861	0.708733	0.419835	0.210791	0.297971
C330007P06Rik	77644	80.7117	77.909	70.644	78.3669	86.9122	104.693	119.231	98.5567	76.9079	102.348	-0.411478	3.75003e-05	0.000145903
C330011M18Rik	442802	1.39288	1.15101	0.958181	1.24167	1.80062	1.99336	1.79824	2.09695	1.18593	1.92229	-0.690919	0.0126036	0.026575
C330013E15Rik	78445	1.2423	1.47473	1.48082	0.815952	0.932465	1.24585	0.74275	0.719849	1.25345	0.910228	0.46335	0.175041	0.254925
C330018D20Rik	77422	10.616	9.8915	11.1933	11.7426	6.88095	8.88706	7.34932	9.04505	10.8608	8.0406	0.433852	0.0035124	0.00856918
C330027C09Rik	224171	10.616	10.6109	16.7246	16.2126	20.9322	29.3605	27.9509	29.4825	13.541	26.9315	-0.992465	2.06211e-09	1.8015e-08
C3ar1	12267	1345.29	1308.55	1804.08	1823.19	1129.92	1307.56	1432.14	1255.79	1570.28	1281.35	0.29336	0.01672	0.0339582
C430049B03Rik	72575	1.95756	1.94233	2.00347	1.73833	2.73309	2.15947	2.42371	2.19084	1.91042	2.37678	-0.31755	0.194309	0.278411
C4b	12268	4.44215	5.4673	2.52611	2.09309	19.2924	6.39536	6.17656	5.00764	3.63216	9.21799	-1.34266	0.000561079	0.00165383
C530005A16Rik	654318	1.6564	1.33086	1.48082	1.45452	1.12539	1.45349	1.56368	1.3771	1.48065	1.37992	0.105136	0.720442	0.788626
C530008M17Rik	320827	0.715262	1.15101	2.13413	2.34143	1.70416	0.539868	0.977303	0.751146	1.58546	0.99312	0.661329	0.104104	0.164934
C5ar1	12273	227.905	224.483	414.5	376.296	259.708	235.092	249.955	241.963	310.796	246.679	0.333209	0.0347777	0.0642267
C5ar2	319430	16.2628	16.5458	27.8308	26.7136	15.2088	15.8223	13.4086	15.1168	21.8382	14.8891	0.551307	0.000631345	0.00183938
C77080	97130	80.147	90.3183	47.9526	44.0259	127.619	115.116	126.854	115.708	65.611	121.324	-0.886521	1.44453e-07	9.04154e-07
C77370	245555	0.715262	0.827289	3.35363	3.37024	3.18324	0.955151	1.40732	0.907635	2.0666	1.61334	0.349124	0.456756	0.552738
C78339	97863	35.6502	37.192	30.9667	32.9574	38.4883	39.4519	34.4793	40.8123	34.1916	38.3079	-0.163758	0.0841769	0.137373
C87436	232196	20.2909	20.4664	20.4267	19.2281	11.1253	10.216	11.9231	13.0825	20.103	11.5867	0.79239	1.0519e-10	1.14183e-09
C8g	69379	2.86105	2.48187	2.17768	1.88024	1.80062	2.11794	2.34553	1.72138	2.35021	1.99637	0.240322	0.354063	0.45341
C920006O11Rik	320295	1.31759	0.935196	1.08884	1.38357	0.964619	1.37043	1.32913	0.970231	1.1813	1.1586	0.0392786	0.898132	0.924939
C920009B18Rik	606736	34.0314	29.9622	33.3621	35.689	30.2569	38.3722	40.6949	34.4901	33.2612	35.9535	-0.110748	0.284273	0.379791
C920021L13Rik	100042889	2.97398	2.51784	3.26652	2.48333	2.34724	2.32559	2.61917	2.15955	2.81042	2.36289	0.248268	0.27265	0.36701
C920025E04Rik	667803	1.61875	1.47473	1.1324	1.24167	1.12539	0.955151	1.05549	1.09542	1.36689	1.05786	0.367555	0.216865	0.305157
Caap1	67770	12.31	11.3303	13.1532	14.4033	10.3214	12.0847	10.7894	10.8916	12.7992	11.0218	0.216906	0.105816	0.16743
Cab39	12283	463.716	450.728	420.162	445.652	431.41	438.622	431.694	455.069	445.065	439.199	0.0191592	0.833001	0.875803
Cab39l	69008	42.5769	41.7601	42.5084	46.6867	28.2955	36.0466	33.9711	38.997	43.383	34.3275	0.338197	0.000896235	0.00251936
Cabin1	104248	99.6849	102.8	107.882	95.7857	90.7064	93.7294	91.241	86.6948	101.538	90.5929	0.164538	0.042001	0.0757826
Cables1	63955	7.52907	8.56064	6.14107	6.24381	7.17034	7.10134	7.74024	8.70078	7.11865	7.67817	-0.108847	0.535073	0.626941
Cables2	252966	21.7967	20.1427	23.9981	22.9176	23.4724	23.3389	21.9307	22.0336	22.2138	22.6939	-0.0316097	0.762318	0.820538
Cabyr	71132	1.84462	1.61861	1.61149	1.27714	1.47908	1.20432	1.79824	1.09542	1.58796	1.39427	0.188595	0.531716	0.624195
Cacfd1	381356	9.67486	9.8915	7.66544	8.47881	15.0802	15.2409	17.4351	13.3641	8.92765	15.2801	-0.771804	4.52723e-08	3.10331e-07
Cachd1	320508	1.35523	1.47473	2.04702	2.58976	1.86493	0.622925	0.625474	0.500764	1.86669	0.903523	1.03227	0.0116623	0.0248369
Cacna1a	12286	69.6816	70.4274	104.529	99.1204	65.6906	64.9087	70.3267	43.4413	85.9396	61.0918	0.492586	0.000948538	0.00265126
Cacna1c	12288	2.59753	3.63288	4.22471	4.6119	2.95817	0.332226	0.74275	0.438169	3.76675	1.11783	1.73686	0.000380574	0.00116964
Cacna1d	12289	42.1628	40.8249	35.322	38.7045	45.5943	42.9403	42.5322	37.8703	39.2536	42.2343	-0.104657	0.276784	0.37168
Cacna1h	58226	1.95756	1.65458	3.48429	2.83809	2.34724	1.53655	1.52459	0.688551	2.48363	1.52423	0.70029	0.0397044	0.0721994
Cacna2d1	12293	1.84462	2.15814	2.04702	2.55428	2.50801	0.539868	0.74275	0.469466	2.15102	1.06502	1.00083	0.0222684	0.0436718
Cacnb1	12295	2.52224	2.94946	3.65851	3.19286	3.24755	1.28738	2.03279	1.25191	3.08077	1.95491	0.648261	0.0320611	0.0599376
Cacnb3	12297	2.74811	3.74078	5.09578	4.54095	4.4694	2.24253	2.18916	1.75267	4.03141	2.66344	0.592077	0.0502774	0.0885751
Cacnb4	12298	2.22108	2.62574	2.26479	1.95119	5.08033	1.53655	1.87642	1.3458	2.2657	2.45978	-0.12393	0.730722	0.796763
Cacng4	54377	1.69404	1.9783	5.61842	5.3569	6.01279	2.15947	2.5019	2.09695	3.66192	3.19278	0.192165	0.616547	0.699385
Cactin	70312	23.9048	24.0273	26.0015	24.0528	27.556	24.6263	26.8954	24.2245	24.4966	25.8255	-0.0769863	0.439602	0.537227
Cacul1	78832	218.117	221.354	231.226	241.203	302.762	354.735	323.448	352.162	227.975	333.277	-0.547791	3.03851e-09	2.57594e-08
Cacybp	12301	50.0307	53.522	50.6529	57.6133	61.1569	67.1928	70.2095	80.4978	52.9547	69.7642	-0.397599	2.95132e-05	0.000117235
Cad	69719	27.2176	28.7753	26.9162	25.6138	22.6686	26.0798	25.9963	26.4779	27.1307	25.3056	0.101141	0.307468	0.405068
Cadm1	54725	332.898	326.563	437.017	469.705	196.139	179.07	176.227	181.12	391.546	183.139	1.09611	9.70877e-21	3.28551e-19
Cadm2	239857	2.71047	2.26605	5.22644	6.49214	8.39219	2.65781	2.61917	1.62748	4.17377	3.82416	0.122875	0.764385	0.822331
Cadm3	94332	0.150581	0.215814	1.48082	1.49	0.707388	0.290698	0.273645	0.28168	0.834305	0.388353	1.07803	0.0676231	0.114033
Cadm4	260299	3.61396	3.23722	5.9233	4.96667	10.868	3.03157	3.04919	2.40993	4.43528	4.83968	-0.130261	0.724743	0.792067
Cadps	27062	0.376454	0.539536	5.00867	6.35024	1.28616	0.872095	0.664566	0.469466	3.06872	0.823072	1.89099	0.00193925	0.00504066
Cage1	71213	3.12457	2.48187	1.69859	1.56095	1.1897	1.41196	1.29004	1.62748	2.21649	1.3798	0.682519	0.0290289	0.0550036
Calcoco1	67488	55.6775	60.3201	57.186	48.7443	37.7166	39.0781	41.7113	35.7733	55.482	38.5698	0.525058	4.31446e-08	2.97401e-07
Calcrl	54598	30.7563	30.214	64.4594	66.9081	23.5367	32.5997	28.1072	34.9909	48.0844	29.8086	0.68954	0.00143542	0.00385386
Cald1	109624	62.1902	61.5791	26.0015	27.3876	15.8519	4.73423	4.65196	4.72596	44.2896	7.49102	2.56075	1.75671e-12	2.38843e-11
Calhm2	72691	22.2861	20.2146	18.249	15.3257	18.7458	14.2857	12.9786	16.5565	19.0188	15.6417	0.279561	0.0533125	0.0931229
Calm1	12313	667.377	692.656	861.056	884.137	799.091	906.065	801.701	1061.87	776.307	892.182	-0.200749	0.0935341	0.150431
Calm2	12314	471.433	469.756	485.275	491.239	394.465	454.403	422.312	505.083	479.426	444.066	0.110508	0.265923	0.359723
Calm3	12315	154.007	167.436	215.199	205.23	179.001	200.54	227.712	219.303	185.468	206.639	-0.156023	0.173014	0.25254
Calr	12317	672.309	661.903	519.682	543.069	1022.18	1179.57	1332.81	1338.17	599.241	1218.18	-1.02347	1.53334e-18	4.24443e-17
Calu	12321	221.317	220.023	159.711	171.031	174.725	166.944	170.481	181.151	193.02	173.325	0.155343	0.153258	0.228302
Camk1	52163	201.892	212.541	186.671	176.849	249.611	267.982	255.975	289.317	194.488	265.721	-0.450219	2.17295e-06	1.08586e-05
Camk1d	227541	75.5919	73.7006	72.4733	76.0964	82.7	79.6098	81.468	82.9078	74.4656	81.6714	-0.133298	0.0869174	0.141246
Camk2b	12323	4.17864	3.56094	5.00867	5.42786	5.56264	3.07309	3.32283	2.66031	4.54403	3.65472	0.310158	0.217208	0.305569
Camk2d	108058	136.615	140.927	164.589	173.408	161.702	195.723	196.79	181.277	153.885	183.873	-0.256702	0.0126397	0.0266259
Camk2g	12325	37.5701	37.2999	42.8133	37.5693	44.3082	40.0748	43.9395	46.4772	38.8131	43.6999	-0.172875	0.0486527	0.0860956
Camk2n1	66259	7.34085	6.61831	2.56967	3.15738	19.6461	13.2475	11.8058	12.4878	4.92155	14.2968	-1.53565	1.84617e-08	1.36748e-07
Camk2n2	73047	1.2423	1.40279	1.26306	0.957857	1.51124	0.789038	0.781842	1.03283	1.2165	1.02874	0.227734	0.495968	0.590331
Camkk1	55984	1.50581	2.08621	2.48256	1.88024	12.9581	11.5864	10.8285	11.5802	1.9887	11.7383	-2.56421	2.73082e-33	2.4734e-31
Camkk2	207565	44.2333	44.8175	41.8986	41.6136	72.7966	66.5699	63.9156	68.7925	43.1407	68.0186	-0.657158	1.00686e-15	2.06364e-14
Camkmt	73582	1.6564	1.58264	1.61149	1.84476	1.02893	0.996679	1.13367	0.688551	1.67382	0.961957	0.804478	0.00678307	0.0153705
Caml	12328	28.9869	30.1421	29.66	33.9152	36.8485	35.5067	32.9938	37.6512	30.6761	35.75	-0.221045	0.0173056	0.0350205
Camsap1	227634	59.2538	61.9747	53.179	49.7021	86.3013	80.8141	87.1363	77.5872	56.0274	82.9597	-0.565967	6.72284e-10	6.32635e-09
Camsap2	67886	150.92	147.905	118.814	132.504	201.927	174.004	180.41	178.773	137.536	183.778	-0.418026	7.99686e-06	3.54591e-05
Camta1	100072	6.58794	6.65428	7.83966	7.91119	7.39542	7.64121	7.23204	6.29085	7.24827	7.13988	0.0225742	0.892507	0.92024
Camta2	216874	54.4729	55.0327	57.4037	53.3207	43.6651	48.0898	50.2725	38.8718	55.0575	45.2248	0.284851	0.00369069	0.00896156
Cand1	71902	130.893	125.316	122.081	129.453	173.889	168.48	164.734	171.7	126.936	169.701	-0.418865	6.65722e-08	4.40406e-07
Cand2	67088	5.04448	6.25862	6.01041	5.32143	3.98709	4.1113	4.41741	3.56794	5.65873	4.02094	0.494288	0.0109824	0.0235108
Cant1	76025	82.8198	83.8079	74.9559	68.2562	47.0734	50.2908	52.1489	49.7947	77.4599	49.827	0.63691	6.36618e-13	9.17176e-12
Canx	12330	909.173	875.883	653.61	707.395	970.053	1096.85	1153.49	1154.1	786.515	1093.62	-0.475523	3.63992e-05	0.000141933
Cap1	12331	622.617	613.453	948.163	936.571	719.349	827.493	909.205	847.982	780.201	826.007	-0.0823214	0.551804	0.642207
Capg	12332	388.651	391.451	446.033	413.475	166.107	175.416	173.061	195.705	409.903	177.572	1.20671	4.29108e-35	4.67765e-33
Capn1	12333	57.9739	57.3347	62.7173	55.7331	56.4302	57.1014	61.2183	60.8741	58.4397	58.906	-0.0120445	0.882594	0.913484
Capn10	23830	12.0842	12.4093	12.6741	11.7426	11.1574	12.6661	11.7667	13.0512	12.2276	12.1604	0.00761409	0.952188	0.964798
Capn15	50817	12.6112	13.7762	12.3692	11.1395	13.6976	14.701	16.3405	10.516	12.474	13.8138	-0.144472	0.3241	0.422417
Capn2	12334	112.108	104.598	128.048	131.049	150.095	146.055	157.072	166.911	118.951	155.033	-0.382512	3.01722e-05	0.000119775
Capn3	12335	11.4818	11.0785	3.83272	3.65405	8.64942	8.34719	9.18665	8.20001	7.51177	8.59582	-0.192842	0.520304	0.613567
Capn5	12337	27.8199	26.8689	21.6462	18.3767	12.8294	8.84553	9.85121	10.5786	23.6779	10.5262	1.16654	4.17827e-14	7.07949e-13
Capn7	12339	116.851	111.18	101.611	105.364	105.176	103.655	102.421	112.359	108.752	105.903	0.0382224	0.633677	0.714279
Capns1	12336	207.087	205.815	232.838	210.87	190.962	221.429	222.043	217.269	214.153	212.926	0.00829643	0.929807	0.947628
Capns2	69543	1.12936	0.863258	0.696859	0.993333	1.25401	1.86877	1.64187	0.751146	0.920703	1.37895	-0.565326	0.122114	0.18845
Caprin1	53872	415.04	408.824	403.525	421.28	437.037	493.439	504.64	488.808	412.167	480.981	-0.222679	0.0157393	0.0322376
Caprin2	232560	3.27515	2.91349	3.78917	4.32809	1.80062	1.32891	1.75915	2.09695	3.57648	1.74641	1.02478	6.34067e-05	0.000233148
Capza1	12340	184.011	181.032	211.932	221.442	232.473	272.301	257.461	302.211	199.604	266.112	-0.414944	7.92191e-05	0.000285829
Capza2	12343	428.593	423.284	425.127	456.224	491.57	531.895	503.78	565.582	433.307	523.207	-0.271985	0.00343457	0.00839759
Capzb	12345	162.816	159.739	155.835	159.891	197.94	243.896	256.953	232.167	159.57	232.739	-0.544258	1.07974e-08	8.34392e-08
Car13	71934	31.5468	27.948	25.8273	29.1259	34.7263	37.9569	39.6785	39.1222	28.612	37.871	-0.403276	2.80374e-05	0.000111877
Car14	23831	1.6564	1.9783	1.48082	1.56095	1.83278	0.74751	1.13367	1.15802	1.66912	1.21799	0.44304	0.155054	0.230699
Car2	12349	8.73373	9.10018	1.43727	1.91571	10.2571	2.15947	2.22825	2.34733	5.29672	4.24804	0.316647	0.546397	0.63742
Car5b	56078	1.50581	1.11504	1.17595	1.70286	0.996773	0.955151	1.29004	0.938933	1.37492	1.04522	0.400237	0.198093	0.282552
Car7	12354	1.39288	1.72652	1.08884	1.66738	0.610926	0.373755	0.54729	0.56336	1.4689	0.523832	1.47307	3.386e-05	0.000132831
Car9	230099	4.59274	4.64001	6.79437	5.60524	4.85525	4.9834	4.06558	5.6336	5.40809	4.88446	0.142003	0.486708	0.58184
Card11	108723	1.39288	1.33086	2.61322	2.41238	1.63985	1.57808	1.09458	1.00153	1.93733	1.32851	0.540713	0.0938641	0.150824
Card6	239319	3.80218	3.38109	2.39545	2.94452	1.06108	0.664453	0.977303	1.06412	3.13081	0.94174	1.72	2.26919e-09	1.96016e-08
Card9	332579	50.4072	49.961	49.3463	45.4805	43.022	40.0333	41.7895	39.6543	48.7987	41.1248	0.246481	0.00309367	0.00767994
Carf	241066	9.63722	10.8267	9.36404	10.0398	7.00957	8.05649	9.03028	8.3252	9.96693	8.10539	0.300345	0.0492526	0.0869655
Carhsp1	52502	45.4003	46.2562	53.3097	54.7043	72.3786	72.2177	64.5411	76.523	49.9176	71.4151	-0.517286	3.25969e-08	2.29445e-07
Carkd	69225	39.49	39.0624	35.322	33.5959	31.8324	33.9702	33.4629	31.2665	36.8676	32.633	0.177034	0.0487623	0.0862636
Carm1	59035	26.5023	26.5452	25.6531	25.4719	24.6621	22.716	21.5007	21.4077	26.0431	22.5716	0.206118	0.0533518	0.0931784
Cars	27267	77.5118	72.118	77.1335	71.7683	75.1439	69.4769	72.6723	64.1917	74.6329	70.3712	0.0847227	0.315291	0.413297
Cars2	71941	9.97602	9.20808	9.01561	10.3236	8.58511	8.97012	10.6721	11.6428	9.63082	9.96754	-0.0497814	0.733189	0.798958
Casc1	320662	0.865844	1.40279	1.00173	1.45452	1.44693	1.49502	1.44641	1.28321	1.18122	1.41789	-0.255299	0.415676	0.513778
Casc3	192160	39.2641	42.6593	41.4631	42.4295	43.2793	41.3207	44.6823	41.8764	41.454	42.7897	-0.0456008	0.574846	0.663756
Casc4	319996	5.49622	5.82699	6.5766	7.87571	9.77481	1.86877	2.77554	2.06565	6.44388	4.12119	0.640085	0.094311	0.151425
Casc5	76464	8.50785	7.76932	17.1601	17.6317	18.8422	24.211	20.4061	27.855	12.7672	22.8286	-0.839359	0.000176828	0.000587264
Casd1	213819	52.2518	53.7018	53.2226	60.2031	31.9611	31.603	32.1728	32.9878	54.8448	32.1812	0.769093	1.82298e-19	5.53091e-18
Cask	12361	64.2606	61.615	57.2731	64.2828	46.1731	38.3306	39.9131	43.097	61.8579	41.8785	0.561821	2.6569e-10	2.68041e-09
Caskin1	268932	2.0705	1.83442	3.09231	1.98667	2.34724	1.32891	1.60278	1.31451	2.24597	1.64836	0.435016	0.134933	0.205358
Caskin2	140721	9.41134	11.7619	16.5939	16.2126	10.8037	10.1744	11.7667	9.45192	13.4949	10.5492	0.354747	0.0376792	0.0689851
Casp1	12362	87.9019	90.3903	86.8024	100.114	57.9093	72.2593	68.0594	76.6482	91.3021	68.719	0.410305	2.53676e-05	0.000101917
Casp2	12366	29.7775	29.7105	32.0555	30.545	20.2892	17.5249	16.4578	19.8428	30.5221	18.5287	0.717235	1.5778e-11	1.92239e-10
Casp3	12367	24.2813	22.4447	21.5155	22.6338	20.1605	22.0515	21.8525	26.8848	22.7188	22.7373	-0.00168197	0.988729	0.991789
Casp4	12363	36.1396	35.1778	26.8726	30.3676	68.1664	62.7077	69.7013	69.1055	32.1394	67.4202	-1.06793	3.02474e-24	1.35981e-22
Casp6	12368	8.9596	9.35196	7.88321	7.16619	7.71696	8.47178	7.31023	7.32368	8.34024	7.70566	0.115631	0.47044	0.566404
Casp7	12369	22.5119	23.308	23.911	25.6848	27.6203	32.7243	30.6482	35.9924	23.8539	31.7463	-0.412205	6.19719e-05	0.000228622
Casp8	12370	90.6877	90.678	99.9121	100.398	75.176	81.1048	86.4718	90.1063	95.4189	83.2147	0.197272	0.0220635	0.0432975
Casp8ap2	26885	46.9438	47.3713	55.8358	60.8062	53.3113	56.8938	61.7656	59.8413	52.7393	57.953	-0.135953	0.166116	0.244254
Casp9	12371	46.5673	47.3713	44.4683	46.19	43.6651	44.809	47.6924	45.7573	46.1492	45.481	0.0215853	0.793723	0.844818
Cass4	320664	3.27515	3.92063	1.48082	1.24167	9.13173	10.299	11.2194	12.5191	2.47957	10.7923	-2.11613	9.13999e-13	1.28817e-11
Cast	12380	108.682	106.073	98.5619	101.355	85.4653	92.1098	96.2448	104.941	103.668	94.6903	0.130688	0.122351	0.188721
Casz1	69743	3.99041	3.20125	2.17768	3.19286	3.56909	3.23921	2.58008	2.66031	3.14055	3.01217	0.0632204	0.799739	0.84988
Cat	12359	607.446	601.619	374.997	372.677	140.159	180.316	181.935	181.089	489.185	170.875	1.51754	1.45352e-22	5.54319e-21
Catsper2	212670	1.39288	1.18698	1.35016	1.20619	1.25401	1.53655	1.17276	1.03283	1.28405	1.24904	0.0435526	0.892673	0.92024
Catsperg1	320225	4.51744	5.03567	3.26652	3.65405	1.35047	0.74751	0.860027	0.751146	4.11842	0.927287	2.13835	4.31959e-14	7.30889e-13
Cav1	12389	2.55989	2.37396	3.5714	2.16405	3.31186	0.872095	0.664566	0.876337	2.66732	1.43121	0.883715	0.0344925	0.0638051
Cav2	12390	28.3093	29.2069	20.9929	24.4431	20.7715	26.4951	23.0644	28.168	25.738	24.6247	0.0649471	0.616163	0.699143
Cbfa2t2	12396	37.7583	39.4221	39.1983	35.9019	34.9835	31.603	34.5574	33.3321	38.0702	33.619	0.178615	0.0526312	0.0920504
Cbfa2t3	12398	2.18343	2.73365	0.914627	0.993333	7.29895	5.77244	5.39471	5.25802	1.70626	5.93103	-1.79002	1.29907e-07	8.20615e-07
Cbfb	12400	137.519	131.107	157.316	166.348	191.348	206.562	194.014	206.91	148.072	199.708	-0.431642	7.55747e-06	3.37049e-05
Cbl	12402	94.8287	95.318	102.743	103.342	123.632	141.612	123.218	106.725	99.058	123.797	-0.321323	0.00409308	0.00982434
Cblb	208650	47.1697	46.544	47.2993	46.6512	44.4046	58.5549	60.241	48.3863	46.916	52.8967	-0.171817	0.102544	0.162733
Cbll1	104836	27.7446	27.5883	30.2698	28.7002	32.7971	33.804	35.7302	34.9909	28.5757	34.3306	-0.265134	0.00264188	0.00666721
Cbr1	12408	21.4579	23.2001	17.5521	18.9798	18.7136	18.8539	18.8815	19.9993	20.2974	19.1121	0.0874867	0.496184	0.590474
Cbr2	12409	1.12936	1.5107	0.391983	0.532143	7.90988	11.8356	10.1249	12.5817	0.891047	10.613	-3.55467	2.43651e-28	1.53913e-26
Cbr3	109857	11.6324	12.6611	8.58007	8.26595	11.6076	10.4236	10.2421	12.2687	10.2849	11.1355	-0.114944	0.471755	0.567488
Cbr4	234309	11.2936	13.2366	11.6724	13.1262	8.16711	9.0947	9.14756	10.7664	12.3322	9.29395	0.407888	0.00288537	0.0072108
Cbwd1	226043	11.1054	11.1504	13.4145	12.7359	9.77481	12.2093	10.594	11.4863	12.1016	11.0161	0.13573	0.31852	0.416776
Cbx1	12412	58.6515	55.7161	58.4055	63.6088	46.2374	44.726	46.1287	51.2657	59.0955	47.0895	0.326982	0.000116914	0.000405332
Cbx2	12416	6.02326	7.15785	7.27346	6.31476	4.56587	7.68274	9.03028	8.3565	6.69233	7.40885	-0.145196	0.481742	0.577081
Cbx3	12417	22.2484	23.272	25.8709	26.6426	21.9933	22.8406	22.478	26.2275	24.5085	23.3848	0.0666532	0.548742	0.63949
Cbx4	12418	16.9781	17.3011	13.3274	11.2814	19.1316	15.0748	14.3077	15.5237	14.722	16.0095	-0.121848	0.417725	0.515998
Cbx5	12419	76.8718	72.5856	105.618	113.808	73.7291	90.241	92.492	104.347	92.2207	90.2022	0.0317752	0.811669	0.859168
Cbx6	494448	26.3518	27.4444	34.2767	29.6226	24.2441	24.8755	23.5725	24.0993	29.4239	24.1978	0.280965	0.00817476	0.0181011
Cbx7	52609	20.3661	20.0707	13.763	12.8779	7.58834	6.85217	6.88021	7.26108	16.7694	7.14545	1.22976	4.23947e-13	6.24663e-12
Cbx8	30951	4.4798	5.03567	4.31181	4.43452	2.73309	1.66113	2.30644	2.34733	4.56545	2.262	1.00484	3.25558e-06	1.57202e-05
Cby1	73739	7.19027	6.79815	7.49123	7.62738	6.81664	6.06313	7.4666	8.04352	7.27676	7.09747	0.0334411	0.838084	0.878971
Cc2d1a	212139	46.0026	49.6733	54.0065	48.9926	38.3275	35.8389	42.415	34.4275	49.6688	37.7522	0.395785	1.82357e-05	7.56574e-05
Cc2d1b	319965	78.2271	76.1825	76.8722	74.8547	75.3689	79.7344	86.5891	84.3475	76.5341	81.51	-0.090786	0.257375	0.350276
Cc2d2a	231214	6.28678	5.57521	6.66371	7.76928	3.98709	1.66113	3.24465	2.47252	6.57374	2.84135	1.20303	7.51559e-07	4.13475e-06
Ccar1	67500	91.1771	86.1819	92.116	99.7945	123.793	128.198	154.453	120.152	92.3174	131.649	-0.511619	3.79141e-08	2.63113e-07
Ccar2	219158	47.9978	48.882	59.2765	60.5224	49.3242	53.0732	57.9345	54.2703	54.1697	53.6506	0.013884	0.885439	0.915387
Ccbl1	70266	3.38808	3.77675	4.52958	2.80262	2.15432	3.03157	2.61917	2.44123	3.62426	2.56157	0.501102	0.0358912	0.0660849
Ccdc101	75565	8.62079	10.5389	7.83966	6.13738	7.49188	7.76579	6.99749	7.57406	8.28419	7.4573	0.151822	0.382301	0.481807
Ccdc102a	234582	2.29637	2.37396	1.95991	1.98667	2.57232	0.830566	0.703658	0.84504	2.15423	1.2379	0.784996	0.0288985	0.0547901
Ccdc106	232821	2.33401	1.87039	2.9181	3.61857	1.6077	1.45349	1.72005	1.47099	2.68527	1.56306	0.778687	0.00322195	0.00794713
Ccdc107	622404	16.4134	14.9991	14.6776	15.3612	11.8005	10.6312	11.9622	12.3626	15.3628	11.6891	0.392891	0.000908997	0.00255232
Ccdc109b	66815	16.3381	16.4379	17.0295	18.2348	6.0771	4.94187	4.88652	5.94657	17.01	5.46302	1.63187	7.89559e-36	9.35172e-34
Ccdc112	240261	3.68925	4.10047	3.09231	3.58309	2.8617	2.7824	3.36192	2.56642	3.61628	2.89311	0.326155	0.130443	0.199528
Ccdc115	69668	33.8432	34.7461	31.7071	30.4386	65.9157	81.6862	87.5664	85.8498	32.6837	80.2545	-1.29542	5.17937e-35	5.57094e-33
Ccdc117	104479	39.3018	40.5012	31.5764	36.3986	35.8838	29.6927	30.4137	37.4321	36.9445	33.3556	0.14653	0.160633	0.237707
Ccdc12	72654	36.1772	34.7102	34.4509	28.8067	34.7906	30.3157	30.57	34.052	33.5362	32.4321	0.046402	0.621746	0.704245
Ccdc120	54648	3.12457	3.59691	3.78917	3.725	2.73309	2.57476	2.38462	2.19084	3.55891	2.47083	0.525765	0.022417	0.0439212
Ccdc122	108811	5.23271	5.57521	3.61495	4.54095	5.11248	4.44353	4.69105	5.75879	4.74095	5.00146	-0.0770714	0.687988	0.762245
Ccdc124	234388	23.8295	24.2072	27.1775	23.3433	23.4724	27.6163	32.8765	26.2588	24.6394	27.556	-0.160702	0.145009	0.217991
Ccdc125	76041	3.83983	5.32342	6.35883	6.63405	3.08678	2.28406	2.58008	2.72291	5.53903	2.66846	1.04793	9.73904e-06	4.25664e-05
Ccdc126	57895	8.39492	8.45273	6.01041	6.705	4.72664	5.64785	5.55108	6.91681	7.39076	5.71059	0.372503	0.0565574	0.0979439
Ccdc127	67433	49.4284	46.0764	41.8115	43.7776	47.6844	52.4503	52.1489	55.9917	45.2735	52.0688	-0.201312	0.0251272	0.0484302
Ccdc130	67736	13.6276	13.8481	13.8936	13.0907	9.83912	10.9219	10.7894	9.23284	13.615	10.1958	0.419371	0.00083917	0.00237506
Ccdc132	73288	93.2099	89.8148	86.062	98.2335	84.147	98.339	92.9611	92.4849	91.8301	91.983	-0.00171929	0.983822	0.988638
Ccdc134	76457	11.9336	10.6468	10.2787	10.0752	11.8648	9.59304	8.13116	10.1718	10.7336	9.9402	0.107965	0.452166	0.548964
Ccdc137	67291	16.8651	15.0351	17.3779	16.7093	18.7779	19.3937	16.6923	21.6268	16.4968	19.1227	-0.214756	0.0861312	0.140098
Ccdc138	76138	1.54346	1.90636	1.74215	1.56095	1.02893	1.53655	1.0164	0.782444	1.68823	1.09108	0.639653	0.0357685	0.0658715
Ccdc14	239839	5.08213	5.10761	8.05743	5.92452	4.11571	4.402	4.14376	4.75726	6.04292	4.35468	0.468212	0.0224637	0.0440057
Ccdc141	545428	1.09172	1.43876	1.56793	2.12857	1.80062	1.66113	1.4855	2.34733	1.55675	1.82365	-0.231136	0.462134	0.558424
Ccdc142	243510	15.1334	15.0351	18.0312	15.645	9.96773	10.6312	9.53848	9.7336	15.9612	9.96777	0.678327	3.67339e-08	2.55932e-07
Ccdc146	75172	1.2423	1.15101	1.52438	2.235	1.70416	0.955151	1.32913	0.782444	1.53817	1.19272	0.365086	0.2844	0.37992
Ccdc148	227933	2.03285	1.47473	1.17595	1.31262	1.70416	3.19768	2.58008	3.47405	1.49904	2.73899	-0.864089	0.00676467	0.0153457
Ccdc15	245902	2.67282	1.9783	4.39892	4.29262	2.4437	2.40864	3.28374	2.8481	3.33566	2.74604	0.277666	0.314149	0.412114
Ccdc152	100039139	1.91991	2.91349	3.0052	2.69619	2.18647	4.19436	3.40101	3.78703	2.6337	3.39222	-0.36246	0.189523	0.272695
Ccdc154	207209	1.80698	1.00713	1.69859	1.38357	1.06108	1.9103	1.4855	0.813742	1.47407	1.31766	0.170878	0.619981	0.70244
Ccdc157	216516	9.90073	10.1073	10.0609	8.3369	8.81019	6.18772	8.20935	5.44581	9.60146	7.16327	0.421738	0.0182738	0.0366547
Ccdc159	67119	3.50102	3.20125	2.09058	1.95119	0.771696	0.622925	0.74275	0.594657	2.68601	0.683007	1.96939	8.37967e-10	7.76096e-09
Ccdc163	68394	11.8959	10.431	12.979	13.5164	6.0771	7.01828	7.74024	6.91681	12.2056	6.93811	0.816047	6.86623e-08	4.52673e-07
Ccdc166	223648	3.53866	3.66885	3.91983	3.01548	1.67201	2.36711	1.4855	1.78397	3.5357	1.82715	0.953691	4.9331e-05	0.000186284
Ccdc167	68597	8.77137	10.1433	10.2351	10.0752	7.97419	7.89038	8.4439	7.38627	9.80625	7.92368	0.308281	0.0243776	0.0471921
Ccdc17	622665	3.27515	3.99257	5.61842	5.10857	2.57232	3.15615	3.28374	2.56642	4.49868	2.89466	0.637527	0.00549349	0.0127605
Ccdc171	320226	5.53387	5.35939	7.01214	7.80476	2.57232	1.57808	1.91551	1.87787	6.42754	1.98594	1.68505	3.76157e-13	5.58927e-12
Ccdc173	75051	2.52224	2.12218	2.09058	2.76714	1.41478	1.53655	2.42371	1.56489	2.37553	1.73498	0.459419	0.0874905	0.142047
Ccdc174	232236	26.4647	29.2429	27.7437	29.4452	40.1925	36.711	43.3923	37.526	28.2241	39.4554	-0.482756	2.88979e-07	1.7213e-06
Ccdc18	73254	2.29637	1.94233	3.0052	3.33476	1.99355	2.4917	3.24465	3.50535	2.64467	2.80881	-0.0882528	0.750697	0.811932
Ccdc181	74895	8.92195	10.503	10.8449	10.1817	6.01279	5.35715	5.35562	4.78856	10.1129	5.37853	0.909853	5.98936e-09	4.85375e-08
Ccdc23	69216	14.3805	14.9631	13.1532	14.1905	16.6558	18.4386	13.7604	18.6222	14.1718	16.8692	-0.25118	0.0545751	0.0949783
Ccdc25	67179	23.566	21.0059	23.9981	24.9752	29.1958	31.6446	32.7201	33.3634	23.3863	31.731	-0.440249	7.84945e-06	3.4928e-05
Ccdc28a	215814	7.56672	7.48157	7.01214	7.98214	2.7974	3.15615	3.28374	2.91069	7.51064	3.03699	1.30903	1.02687e-12	1.43739e-11
Ccdc28b	66264	7.94317	7.04994	8.84139	9.0819	6.4308	6.8937	6.09837	6.54123	8.2291	6.49102	0.341558	0.0281337	0.0535379
Ccdc32	269336	12.2724	12.9489	13.763	13.9421	12.3471	13.7459	12.4704	13.8336	13.2316	13.0992	0.0143689	0.910258	0.933493
Ccdc34	68201	8.5455	8.56064	9.66891	11.6362	9.42112	12.3754	10.9067	12.1435	9.60281	11.2117	-0.22207	0.164268	0.242176
Ccdc38	237465	1.16701	0.971165	0.958181	1.41905	1.41478	1.86877	1.21186	1.56489	1.12885	1.51507	-0.417255	0.181169	0.262325
Ccdc39	51938	1.91991	1.47473	3.31008	3.05095	1.86493	1.53655	1.91551	1.3458	2.43892	1.6657	0.546061	0.0635939	0.108302
Ccdc40	207607	1.16701	1.29489	1.39372	1.06429	1.28616	0.789038	1.29004	0.406871	1.22997	0.943027	0.383908	0.286416	0.382061
Ccdc43	52715	27.4435	27.5163	28.789	32.6026	33.6009	33.5133	31.0001	35.3352	29.0878	33.3624	-0.198031	0.0553326	0.0961335
Ccdc47	67163	97.5015	94.6706	85.5394	91.0674	88.4878	89.2443	106.37	88.8543	92.1947	93.239	-0.0156799	0.856663	0.893588
Ccdc50	67501	210.249	210.455	249.911	252.945	276.331	330.565	318.718	328.188	230.89	313.451	-0.441023	1.2216e-05	5.22488e-05
Ccdc51	66658	6.85146	7.55351	8.01387	7.05976	5.2411	4.77576	4.84742	5.16413	7.36965	5.0071	0.554147	0.000547136	0.00161699
Ccdc53	67282	30.5304	32.2283	26.35	26.4298	22.8615	31.7276	27.4427	35.7733	28.8846	29.4513	-0.0275687	0.83013	0.873456
Ccdc55	237859	22.0602	21.9771	24.1287	24.8333	24.6621	25.2077	31.7819	25.2573	23.2498	26.7272	-0.200285	0.0685314	0.115232
Ccdc57	71276	9.71251	8.38079	6.92503	5.71166	5.43402	4.77576	5.19925	3.72443	7.6825	4.78337	0.684646	0.000814848	0.00231221
Ccdc58	381045	11.4442	10.8627	11.4546	11.8136	10.8359	10.4651	10.4767	11.8931	11.3938	10.9177	0.0599659	0.643644	0.722883
Ccdc59	52713	38.3983	38.343	37.6304	39.485	36.6877	39.7426	44.135	37.9955	38.4642	39.6402	-0.0421237	0.625468	0.707291
Ccdc6	76551	67.5734	67.6219	61.0622	59.7064	55.9801	60.7559	61.0228	62.7833	63.991	60.1355	0.0899667	0.283789	0.379268
Ccdc61	232933	6.21149	6.43846	8.66718	7.05976	6.14141	4.77576	4.9647	4.35039	7.09422	5.05806	0.484442	0.0107681	0.0231163
Ccdc62	208908	3.46337	3.16528	2.61322	2.94452	1.02893	0.955151	1.44641	1.06412	3.0466	1.12365	1.43973	3.47004e-08	2.43139e-07
Ccdc64	75665	1.88227	2.15814	3.09231	3.15738	2.18647	1.16279	1.60278	1.00153	2.57253	1.48839	0.782775	0.00922288	0.0201218
Ccdc66	320234	15.4346	16.2221	17.6392	16.7802	11.0931	11.005	15.6368	13.4267	16.519	12.7904	0.36879	0.00889387	0.0194886
Ccdc69	52570	2.71047	2.5538	1.82925	2.30595	1.63985	2.32559	2.61917	3.63054	2.34987	2.55379	-0.119023	0.671066	0.747328
Ccdc71	72454	28.6858	30.7536	33.8847	34.5183	28.1669	29.7758	33.7365	29.4199	31.9606	30.2748	0.0787316	0.423788	0.521552
Ccdc71l	72123	66.6323	69.2405	84.0586	88.9388	42.4433	47.7576	42.4931	46.7589	77.2175	44.8632	0.783318	7.80637e-14	1.28041e-12
Ccdc73	211936	3.35044	3.23722	3.31008	4.54095	3.37617	4.27742	3.90921	3.06718	3.60967	3.65749	-0.0122571	0.955044	0.966897
Ccdc74a	72315	2.10814	2.15814	2.87454	2.83809	3.34401	3.40532	2.54099	3.12978	2.49473	3.10502	-0.317956	0.188098	0.271056
Ccdc77	67200	10.3525	8.41676	10.6706	10.43	6.17356	7.1844	9.03028	6.76032	9.96747	7.28714	0.453839	0.00537664	0.0125163
Ccdc78	381077	2.63518	1.83442	2.04702	2.41238	1.41478	1.66113	1.60278	0.907635	2.23225	1.39658	0.685225	0.0164471	0.0334757
Ccdc82	66396	26.7282	23.4159	26.1322	30.3321	14.405	13.3306	15.5196	13.7397	26.6521	14.2487	0.903535	3.754e-15	7.31674e-14
Ccdc84	382073	13.8159	14.6034	13.9372	13.1262	15.0802	14.618	14.0341	12.8008	13.8707	14.1333	-0.0265339	0.831061	0.874136
Ccdc85b	240514	1.88227	2.51784	3.31008	3.15738	3.08678	2.32559	1.87642	2.53512	2.71689	2.45598	0.141394	0.679911	0.755198
Ccdc86	108673	23.9801	23.9914	30.8795	30.5095	29.7424	30.9801	32.251	29.9207	27.3401	30.7236	-0.168699	0.0925693	0.149133
Ccdc88a	108686	97.3133	97.0805	105.661	116.539	97.3944	90.1164	102.695	91.6398	104.149	95.4614	0.125695	0.147959	0.221642
Ccdc88b	78317	73.032	76.5062	82.4906	81.6307	94.9507	87.7493	102.89	75.6154	78.4149	90.3015	-0.203377	0.0405695	0.0735445
Ccdc88c	68339	0.376454	0.539536	2.56967	1.84476	2.82955	1.37043	1.40732	1.3771	1.3326	1.7461	-0.398991	0.389453	0.488522
Ccdc9	243846	51.3859	50.2128	57.5779	49.8086	65.4012	57.8905	64.5411	52.3925	52.2463	60.0563	-0.201391	0.0293295	0.0554963
Ccdc90b	66365	21.7967	20.6822	18.9023	20.044	12.9259	16.6113	17.8651	17.339	20.3563	16.1853	0.332495	0.0082584	0.0182634
Ccdc91	67015	25.1848	26.4732	25.174	28.7712	14.3728	17.1512	18.5297	16.8069	26.4008	16.7151	0.661593	2.78481e-09	2.3783e-08
Ccdc93	70829	85.9444	89.1314	78.7886	83.369	103.15	144.56	151.013	130.199	84.3083	132.23	-0.648606	7.0958e-10	6.63675e-09
Ccdc94	72886	9.26076	8.52467	9.32048	9.18833	10.4179	11.6279	12.1576	10.5786	9.07356	11.1955	-0.301703	0.0287251	0.0545034
Ccdc97	52132	28.7234	26.8329	26.2193	24.0528	29.8067	28.1147	33.5019	22.5344	26.4571	28.4894	-0.105728	0.387029	0.486352
Cchcr1	240084	7.07733	7.22978	9.88668	8.195	5.72341	5.85549	6.80203	5.571	8.0972	5.98798	0.43443	0.0121562	0.0257552
Ccl12	20293	6.24913	5.82699	6.18462	6.705	27.5881	31.5615	29.71	32.9565	6.24143	30.454	-2.28545	1.2542e-59	5.32731e-57
Ccl2	20296	19.9897	20.4664	28.7019	29.8	101.607	134.386	109.888	139.181	24.7395	121.265	-2.29328	3.04631e-22	1.13025e-20
Ccl24	56221	2.55989	2.05024	1.00173	0.993333	11.9613	11.0465	12.6268	8.4504	1.6513	11.0212	-2.72961	8.51603e-23	3.33017e-21
Ccl25	20300	2.22108	1.83442	2.65677	2.76714	2.4437	3.23921	3.16646	2.62901	2.36985	2.8696	-0.272827	0.261906	0.355164
Ccl3	20302	123.627	116.899	131.184	129.843	311.894	408.389	422.312	384.649	125.388	381.811	-1.60639	2.23746e-40	3.4026e-38
Ccl4	20303	63.5077	60.6798	98.2135	90.9254	122.057	142.027	141.709	113.235	78.3316	129.757	-0.728235	3.15203e-07	1.86271e-06
Ccl5	20304	1.80698	1.54667	0.82752	0.957857	0.64308	0.996679	0.781842	0.344275	1.28476	0.691469	0.915236	0.00995867	0.021559
Ccl6	20305	147.457	148.336	65.2869	66.6243	115.272	127.616	117.667	131.325	106.926	122.97	-0.201508	0.323639	0.42195
Ccl7	20306	8.80902	8.41676	4.92156	5.215	45.8194	45.432	39.0921	53.9886	6.84059	46.083	-2.74998	3.61139e-28	2.25813e-26
Ccl8	20307	2.74811	2.23008	1.65504	1.77381	6.55941	2.69934	3.08828	3.12978	2.10176	3.8692	-0.881711	0.00317001	0.00784571
Ccl9	20308	269.616	257.179	304.658	316.589	295.945	576.371	509.292	554.064	287.011	483.918	-0.753603	1.88201e-06	9.54018e-06
Ccm2	216527	43.8945	44.0261	32.0555	30.7578	35.2729	36.1712	34.1274	40.9062	37.6835	36.6194	0.041351	0.727093	0.794001
Ccna2	12428	11.6701	12.4453	27.4388	29.5162	33.2794	41.9436	48.0442	52.6741	20.2676	43.9853	-1.11824	2.22017e-06	1.10721e-05
Ccnb1	268697	10.7666	11.1144	17.857	18.0929	26.7521	38.206	33.111	44.4115	14.4577	35.6202	-1.30153	9.50216e-13	1.33464e-11
Ccnb2	12442	6.92675	6.43846	9.18982	9.79143	19.0352	28.3638	25.3317	37.1504	8.08662	27.4703	-1.76473	4.21585e-20	1.36301e-18
Ccnb2-ps	670453	1.43052	1.47473	1.30661	1.41905	0.707388	0.705981	0.508198	0.657253	1.40773	0.644705	1.11942	0.000522425	0.0015544
Ccnc	51813	35.5749	31.5089	33.7541	36.7533	36.6877	35.7559	33.4629	38.9657	34.3978	36.218	-0.0750902	0.421584	0.519438
Ccnd1	12443	100.965	102.008	169.119	168.831	141.445	147.675	148.316	158.022	135.231	148.864	-0.138747	0.365472	0.464783
Ccnd2	12444	15.8487	15.107	17.6828	15.9643	5.72341	3.98672	4.9647	3.69314	16.1507	4.59199	1.81153	2.53604e-25	1.26987e-23
Ccnd3	12445	14.757	13.2006	17.073	14.2969	11.5111	13.0814	12.744	11.3298	14.8319	12.1666	0.285918	0.0274105	0.0522667
Ccndbp1	17151	41.7487	40.9688	37.7175	37.995	30.2891	31.5615	29.4364	32.8626	39.6075	31.0374	0.351638	0.000113746	0.000395797
Ccne1	12447	3.87747	3.41706	4.92156	5.07309	4.59802	5.77244	6.21565	9.04505	4.3223	6.40779	-0.569973	0.0234792	0.0457044
Ccne2	12448	7.07733	7.04994	12.1515	14.7226	14.9194	16.5698	17.5524	20.4374	10.2503	17.3698	-0.761471	0.000196618	0.000646886
Ccnf	12449	7.56672	7.9132	9.66891	11.104	18.5528	23.6711	23.9635	23.442	9.06322	22.4074	-1.30487	3.37722e-17	8.09351e-16
Ccng1	12450	442.935	429.579	247.211	268.768	225.206	309.469	283.222	306.092	347.123	280.997	0.304998	0.0610286	0.104613
Ccng2	12452	66.7829	65.3558	60.2783	63.8926	60.0636	48.6297	48.4351	54.0825	64.0774	52.8027	0.278338	0.00265783	0.00670336
Ccnh	66671	26.6153	28.0199	34.0154	36.7533	23.183	32.8074	30.14	32.8939	31.351	29.7561	0.0758549	0.544375	0.635543
Ccni	12453	238.295	231.893	197.603	200.157	194.307	217.858	198.432	214.609	216.987	206.301	0.0729866	0.448968	0.546211
Ccnj	240665	6.51265	6.25862	6.53305	6.35024	7.90988	7.97344	7.89661	8.29391	6.41364	8.01846	-0.322931	0.0204461	0.0404847
Ccnk	12454	20.5544	23.2001	23.2577	19.0862	24.9193	26.6196	29.28	25.5077	21.5246	26.5817	-0.304314	0.00528156	0.012317
Ccnl1	56706	169.178	163.372	150.565	170.995	253.759	250.873	250.659	235.453	163.528	247.686	-0.598751	1.46904e-11	1.79698e-10
Ccnl2	56036	126.112	127.978	123.388	130.517	133.15	114.577	111.256	110.168	126.999	117.288	0.114621	0.172089	0.251488
Ccnt1	12455	96.598	97.2604	86.9331	95.6438	112.989	115.573	120.365	119.777	94.1088	117.176	-0.315879	4.29596e-05	0.000164545
Ccnt2	72949	95.1675	93.3757	104.398	113.098	102.796	102.7	106.174	86.0688	101.51	99.4347	0.0301674	0.744797	0.807749
Ccny	67974	257.043	247.827	213.544	229.708	243.631	244.353	246.085	267.439	237.03	250.377	-0.0789894	0.394999	0.493468
Ccnyl1	227210	14.3429	15.2149	9.84313	10.2881	16.2699	16.902	15.6368	17.7145	12.4223	16.6308	-0.419608	0.00674813	0.0153138
Ccp110	101565	17.9192	16.3659	17.857	20.044	19.7747	13.9535	15.0114	15.7115	18.0465	16.1128	0.161466	0.230077	0.3202
Ccpg1	72278	8.58314	9.31599	8.23164	7.45	4.37294	5.56479	5.59017	4.41298	8.39519	4.98522	0.755662	5.13968e-05	0.000193315
Ccr1	12768	18.9733	18.2363	31.0973	33.5605	95.2401	109.967	105.51	113.486	25.4668	106.051	-2.05845	8.7915e-37	1.10504e-34
Ccr2	12772	1.01643	1.15101	0.914627	1.24167	0.675234	1.37043	1.75915	1.03283	1.08093	1.20941	-0.144455	0.665062	0.742453
Ccr3	12771	2.97398	2.76962	14.7211	15.3257	2.82955	2.94851	3.01009	3.34886	8.94761	3.03425	1.55749	0.000176917	0.000587403
Ccr5	12774	85.1162	80.9664	138.675	152.477	88.0376	68.0234	70.9131	65.2558	114.309	73.0575	0.645521	7.61855e-05	0.000275853
Ccr9	12769	1.16701	0.647443	1.56793	0.957857	0.707388	0.705981	0.390921	0.532062	1.08506	0.584088	0.87751	0.0193002	0.0384381
Ccrl2	54199	33.4667	34.2785	12.2821	11.4588	51.575	90.9055	85.8854	67.5406	22.8716	73.9766	-1.69254	1.72038e-09	1.51803e-08
Ccrn4l	12457	13.5523	14.3157	18.5103	18.8379	41.2214	32.8489	34.5965	29.2634	16.304	34.4826	-1.08129	5.29906e-14	8.8808e-13
Ccs	12460	17.9945	16.9774	16.1149	16.0707	16.8487	16.113	18.4515	17.4954	16.7894	17.2272	-0.0370603	0.740526	0.804391
Ccsap	73420	3.53866	3.59691	3.91983	3.68952	5.2411	3.98672	2.93191	4.10001	3.68623	4.06493	-0.145058	0.544716	0.63576
Ccser1	232035	0.225872	0.431629	1.87281	2.30595	0.514464	0.0830566	0.234553	0.187787	1.20907	0.254965	2.20027	0.000253144	0.000808459
Ccser2	72972	70.7357	61.4352	63.8061	64.0345	60.771	56.8938	57.9736	60.5299	65.0029	59.0421	0.138274	0.0916685	0.147836
Cct2	12461	238.37	235.597	208.927	224.209	229.772	232.932	235.022	254.2	226.776	237.982	-0.0695463	0.448381	0.545551
Cct3	12462	115.835	113.77	130.922	135.342	155.272	163.58	154.062	174.735	123.967	161.912	-0.385414	4.17858e-05	0.000160849
Cct4	12464	203.36	210.167	183.056	192.068	177.168	196.844	163.131	207.316	197.163	186.115	0.0831983	0.392479	0.491267
Cct5	12465	216.95	211.102	211.017	213.07	225.367	233.265	248.157	252.667	213.035	239.864	-0.171125	0.0518596	0.0908815
Cct6a	12466	119.712	113.914	133.623	133.319	154.082	149.045	162.232	169.477	125.142	158.709	-0.343085	0.00018741	0.000619237
Cct7	12468	135.674	127.978	135.8	131.581	137.49	140.947	137.37	147.632	132.758	140.86	-0.0856256	0.296809	0.393721
Cct8	12469	158.675	160.854	166.636	180.893	201.187	213.414	209.534	226.189	166.765	212.581	-0.350181	0.000104065	0.000365621
Ccz1	231874	71.6015	70.2116	63.9368	70.2428	64.6938	73.0483	70.014	83.7215	68.9982	72.8694	-0.0786611	0.3913	0.49004
Cd109	235505	8.1314	8.05707	11.2804	13.0552	12.6365	11.5449	11.4149	13.9588	10.131	12.3888	-0.292045	0.0799519	0.131488
Cd14	12475	571.231	565.542	650.779	648.895	480.477	335.341	317.545	298.8	609.112	358.041	0.766485	4.92464e-09	4.04681e-08
Cd151	12476	79.9964	80.8944	72.9088	68.9302	68.0057	63.0815	65.2057	69.0429	75.6825	66.3339	0.189799	0.0225122	0.0440829
Cd160	54215	2.03285	1.79845	2.74388	2.27048	3.18324	4.15283	4.22195	2.53512	2.21141	3.52329	-0.669249	0.0110598	0.0236478
Cd164	53599	153.97	152.833	103.092	105.648	278.389	347.966	317.272	360.237	128.885	325.966	-1.33839	1.22897e-23	5.23822e-22
Cd180	17079	111.995	108.555	168.553	181.993	237.521	327.451	366.059	298.8	142.774	307.458	-1.10663	3.59795e-12	4.69487e-11
Cd1d1	12479	4.78096	3.77675	4.22471	4.54095	2.99032	2.201	2.42371	2.91069	4.33084	2.63143	0.711844	0.00120698	0.00330023
Cd200r1	57781	122.122	122.439	46.6024	48.0702	25.1766	49.0865	46.0505	49.2314	84.8082	42.3862	1.00094	0.000152717	0.000514541
Cd200r4	239849	121.933	116.684	29.0067	28.0262	40.1925	58.1396	55.8626	59.9665	73.9125	53.5403	0.465363	0.167401	0.245774
Cd22	12483	35.8384	36.4726	17.857	18.554	31.6717	28.7791	34.4402	25.9771	27.1805	30.217	-0.151857	0.434401	0.532327
Cd244	18106	9.3737	9.02824	8.58007	8.01762	5.46618	2.61628	2.4628	2.7542	8.74991	3.32487	1.38556	1.04708e-11	1.30283e-10
Cd24a	12484	3.72689	3.77675	7.83966	8.76262	11.9613	9.84221	12.3922	9.70231	6.02648	10.9745	-0.865704	0.000319453	0.000997723
Cd274	60533	38.7371	40.8968	16.5068	16.319	14.0834	16.9436	17.2005	11.9244	28.115	15.038	0.904099	0.000153634	0.000516925
Cd276	102657	7.86788	7.22978	11.2804	9.61404	17.6847	16.4867	20.2106	17.8084	8.99803	18.0476	-1.00681	4.81193e-12	6.20663e-11
Cd28	12487	135.749	128.158	73.867	76.2738	85.3045	163.788	180.371	140.089	103.512	142.388	-0.459655	0.0211487	0.0417283
Cd2ap	12488	149.716	145.711	136.933	151.98	114.629	126.994	136.158	135.926	146.085	128.427	0.186122	0.0285417	0.0541889
Cd2bp2	70233	73.145	69.9598	73.7799	68.9657	58.2952	55.8971	64.3847	53.4253	71.4626	58.0006	0.301323	0.000354663	0.00109795
Cd300a	217303	300.975	300.737	105.705	107.883	123.568	150.125	157.971	157.083	203.825	147.187	0.46977	0.0646663	0.109795
Cd300lb	217304	210.776	212.829	233.361	232.901	162.538	224.793	218.017	194.453	222.467	199.95	0.15421	0.145314	0.218303
Cd300ld	217305	90.6124	89.3831	61.0622	64.6021	18.7779	14.4103	15.285	16.7443	76.415	16.3044	2.22659	1.17798e-62	6.046e-60
Cd300lf	246746	3.2375	4.31629	3.17942	3.05095	5.53048	6.97676	8.17025	7.32368	3.44604	7.00029	-1.01788	5.57982e-08	3.75586e-07
Cd300lh	382551	13.1006	12.7331	12.1079	12.8779	6.62372	8.18108	6.05928	7.60536	12.7049	7.11736	0.836801	1.20395e-09	1.08966e-08
Cd302	66205	30.7939	30.3939	28.5276	29.6581	36.4626	40.6147	36.7857	44.0047	29.8434	39.4669	-0.403129	2.09936e-05	8.59704e-05
Cd320	54219	5.08213	5.71908	3.74561	3.83143	5.04818	5.31562	4.41741	5.571	4.59456	5.08805	-0.145989	0.482402	0.577644
Cd33	12489	36.516	35.8252	18.3796	17.2059	70.0314	102.367	106.604	93.7368	26.9817	93.1849	-1.78716	1.31077e-18	3.66955e-17
Cd34	12490	15.6605	15.6465	9.97379	10.8912	15.3374	3.19768	4.26104	5.16413	13.043	6.99008	0.895913	0.00527014	0.012295
Cd36	12491	1403.42	1358.12	3056.73	3308.22	872.112	1342.57	1295.24	1475.66	2281.62	1246.39	0.872296	0.000177276	0.000588277
Cd37	12493	77.7377	76.4702	91.8111	85.8524	77.5876	77.4088	82.1716	71.2024	82.9679	77.0926	0.105909	0.225659	0.314977
Cd38	12494	81.8034	79.06	73.475	75.4224	333.726	450.79	492.756	430.939	77.4402	427.053	-2.46297	2.59135e-96	7.98008e-93
Cd3eap	70333	7.67966	7.80529	9.05916	8.65619	9.67835	7.64121	11.2976	9.26414	8.30007	9.47033	-0.191913	0.214116	0.301969
Cd4	12504	17.091	16.6896	9.88668	9.36571	41.4143	36.8771	39.6003	38.4962	13.2583	39.097	-1.55875	1.28923e-19	3.96028e-18
Cd40	21939	2.97398	3.34512	2.78743	2.73167	7.58834	9.75915	8.79573	10.7351	2.95955	9.21959	-1.63656	2.24384e-16	4.93565e-15
Cd44	12505	314.904	305.881	402.741	419.577	339.61	316.114	310.861	363.461	360.776	332.511	0.117562	0.300925	0.398136
Cd46	17221	2.89869	1.54667	2.26479	2.48333	1.51124	1.99336	1.72005	0.876337	2.29837	1.52525	0.600342	0.0458379	0.0817277
Cd47	16423	91.29	90.75	82.2729	88.3002	86.655	93.937	86.3936	106.631	88.1533	93.4043	-0.0835317	0.35068	0.4502
Cd48	12506	202.043	198.19	194.511	198.347	84.9508	93.5218	83.0708	99.12	198.273	90.1658	1.13667	5.99875e-37	7.6178e-35
Cd5	12507	1.6564	1.83442	1.61149	1.70286	2.70093	1.86877	1.75915	1.53359	1.70129	1.96561	-0.209153	0.441854	0.539208
Cd52	23833	195.003	188.082	135.887	130.836	107.234	78.4885	80.2952	89.3551	162.452	88.8431	0.870341	1.18538e-10	1.27413e-09
Cd53	12508	1186.88	1170.58	1083.27	1137.12	898.093	1069.48	986.216	1121.56	1144.46	1018.84	0.167764	0.0926088	0.149177
Cd59a	12509	5.83503	6.22265	6.62016	6.1019	4.14786	3.69602	4.06558	4.2252	6.19494	4.03367	0.615662	0.000909367	0.00255278
Cd5l	11801	144.37	142.294	50.348	50.3407	211.445	52.5333	53.5562	41.8451	96.8381	89.8448	0.108037	0.790353	0.84225
Cd63	12512	293.22	293.58	198.039	198.667	283.887	312.334	368.365	314.136	245.876	319.681	-0.378548	0.00488891	0.0114993
Cd63-ps	626721	2.14579	2.26605	2.26479	1.56095	1.92924	2.65781	3.12737	1.84657	2.0594	2.39025	-0.207623	0.383167	0.482701
Cd68	12514	1196.37	1210.11	1307.92	1206.62	1060.73	1288.62	1479.4	1287.12	1230.25	1278.97	-0.0560078	0.595498	0.682041
Cd69	12515	3.72689	4.20838	1.61149	1.66738	5.08033	6.27077	5.55108	4.81986	2.80353	5.43051	-0.947325	0.000891337	0.00250797
[truncated: 10,319 more rows]

## Sheet: S4 CPM_YS
id	gene	KI1	KI2	KI3	KI4	WT1	WT2	WT3	WT4
0610007P14Rik	58520	36.2731	27.868	43.7687	38.1588	24.3176	35.3054	41.1449	40.2474
0610009B22Rik	66050	34.9514	32.0393	36.3317	45.6732	44.9579	41.0425	45.8611	45.4693
0610009L18Rik	66838	1.32169	1.59753	3.16988	0.587059	1.42347	2.09626	0.487884	2.03784
0610009O20Rik	66839	15.5666	12.0702	19.7508	18.7859	13.0485	18.756	10.2456	12.3544
0610010F05Rik	71675	49.0495	37.3644	51.5715	77.9615	62.1581	41.9252	84.8918	61.8994
0610010K14Rik	104457	5.28677	4.61508	3.65755	5.28353	4.86351	5.84746	7.31826	7.76927
0610011F06Rik	68347	14.6855	16.2415	16.8247	12.5631	9.48978	11.5846	8.45666	13.6281
0610012G03Rik	106264	96.4835	99.4905	104.118	115.533	107.946	118.604	102.456	115.775
0610030E20Rik	68364	23.3499	17.9278	29.3823	26.8873	14.5905	29.458	36.5913	26.3646
0610037L13Rik	74098	60.3573	59.0198	54.9852	54.8313	61.0905	69.1765	55.1309	49.9271
0610040B10Rik	67672	0.734274	0.710013	1.09727	0.234824	1.89796	0.661976	0.650512	2.16521
0610040J01Rik	76261	19.6785	7.81014	3.65755	2.9353	10.5574	13.3499	14.4739	6.87771
1110001J03Rik	66117	17.3289	22.3654	20.1165	26.6525	27.639	20.5213	22.1174	26.7467
1110002L01Rik	100043040	1.17484	2.66255	3.53563	2.11341	2.60969	1.43428	2.9273	0.891556
1110004E09Rik	68001	60.7978	50.9434	59.3743	50.2523	34.7563	46.3384	36.9166	37.7001
1110004F10Rik	56372	357.738	366.988	352.222	334.389	325.618	327.568	325.581	293.577
1110007C09Rik	68480	12.0421	13.4902	10.485	16.4377	19.5727	21.1832	14.6365	18.9774
1110008F13Rik	67388	298.849	315.601	315.891	297.169	296.912	318.08	310.132	294.213
1110008L16Rik	66132	5.43362	5.32509	3.2918	11.2715	5.81249	3.64087	9.43243	5.22197
1110008P14Rik	73737	9.83927	9.40767	5.73016	7.27953	8.89667	5.84746	8.45666	6.36825
1110012L19Rik	68618	18.21	25.4717	19.8727	27.944	22.301	26.9204	24.7195	14.1375
1110019D14Rik	76311	5.43362	4.17132	13.7768	1.40894	6.99872	9.48833	8.29403	14.9017
1110032A03Rik	68721	10.2798	12.3365	9.02196	9.51036	14.8278	5.40614	7.48089	12.7365
1110034G24Rik	73747	13.5106	13.4015	14.5083	9.74518	12.574	20.3006	16.9133	22.9257
1110037F02Rik	66185	21.4408	35.0569	29.87	22.7779	29.2997	25.8171	29.273	31.8413
1110038B12Rik	68763	84.1477	103.751	81.3196	91.229	107.353	93.8903	85.3797	98.4532
1110038F14Rik	117171	37.1542	44.0208	37.0632	37.6892	43.5344	30.8922	34.3145	32.8602
1110046J04Rik	68808	1.46855	0.621261	0.243837	1.29153	3.2028	2.20659	0.650512	0.636825
1110051M20Rik	228356	11.161	14.8215	8.16853	5.51836	9.84565	7.72306	14.7992	14.0102
1110054M08Rik	68841	1.32169	0.621261	1.82878	2.23082	1.54209	1.8756	1.78891	0.382095
1110057K04Rik	68832	57.2733	54.9372	49.0112	61.9934	60.2601	58.3643	55.7814	82.2778
1110058L19Rik	68002	38.0354	31.1518	31.8207	41.0941	29.537	42.9181	43.2591	40.6295
1110059E24Rik	66206	110.288	117.33	113.75	120.934	83.0356	145.524	118.393	108.26
1110059G10Rik	66202	25.6996	33.2818	32.0645	27.8266	24.0803	29.127	23.2558	27.5109
1110065P20Rik	68920	7.34274	9.58517	9.63155	14.0894	9.13392	12.0259	6.993	9.17029
1190002N15Rik	68861	20.8534	13.8452	19.0193	15.0287	21.1148	17.9837	25.5326	26.3646
1190007I07Rik	544717	13.5106	15.7978	13.8987	13.5024	12.9298	11.0329	18.2143	13.3733
1200014J11Rik	66874	63.0007	89.1953	72.9072	86.5325	75.3252	81.2024	95.4626	96.4154
1300002E11Rik	100043489	5.43362	1.15377	6.46168	3.992	8.30356	5.95779	5.52935	8.53346
1500002C15Rik	68946	3.08395	4.08257	0.853429	1.87859	1.77933	0.882635	4.22833	2.67467
1500011B03Rik	66236	6.1679	9.67392	12.4357	11.976	4.98214	9.48833	9.92031	14.7744
1500011K16Rik	67885	11.161	12.4252	11.5822	8.80589	11.3877	11.0329	8.78191	6.49562
1500012F01Rik	68949	32.4549	55.026	36.4536	57.1796	41.9923	53.9511	35.1277	47.6345
1600002H07Rik	72016	7.93015	15.354	9.50964	15.6158	9.96427	8.38504	8.78191	12.6091
1600002K03Rik	69770	18.7974	17.3066	17.6782	17.6118	22.7755	18.756	23.4184	27.2561
1600012H06Rik	67912	28.6367	39.672	50.1085	33.2275	41.5178	42.8078	45.3732	41.9031
1600014C10Rik	72244	24.231	24.6729	11.3384	7.984	15.5395	14.2325	11.2213	11.9723
1600020E01Rik	72012	6.60846	5.5026	6.94935	6.69247	7.11734	8.05405	3.90307	3.56622
1700006E09Rik	75437	1.17484	1.15377	0.853429	2.11341	2.84694	0.220659	1.1384	1.91048
1700006J14Rik	321010	3.08395	4.26008	3.16988	2.23082	2.37245	7.39207	6.34249	2.67467
1700007L15Rik	100502742	10.2798	4.61508	4.87674	14.0894	2.37245	4.08219	7.15563	6.75035
1700010I14Rik	66931	4.99306	5.76885	5.60825	9.27553	5.338	7.72306	2.60205	7.13245
1700017B05Rik	74211	16.7414	18.9041	24.5056	18.0814	25.1479	18.6457	16.2628	8.27873
1700020I14Rik	66602	102.358	115.555	103.996	117.412	115.301	131.292	134.331	99.8542
1700021F05Rik	67851	58.4482	52.3634	48.5235	52.7179	57.2946	50.0896	55.2935	35.6622
1700021K19Rik	100502698	7.34274	5.59135	9.2658	5.75318	10.9133	4.74416	7.80615	4.58514
1700022I11Rik	67317	0.734274	0.976267	2.31645	1.76118	1.30485	0.992965	1.46365	2.29257
1700023H06Rik	69442	5.13991	5.5026	5.85208	5.75318	6.28698	4.63384	3.25256	6.49562
1700025G04Rik	69399	13.6575	18.1941	17.0686	29.7052	19.8099	17.6527	21.6295	31.2044
1700026L06Rik	69987	13.6575	11.2715	6.82743	14.5591	14.1161	9.92965	13.4981	16.9396
1700028K03Rik	76421	0.881128	1.15377	5.48633	1.40894	0.474489	1.54461	1.30102	3.05676
1700029J07Rik	69479	3.2308	1.86378	4.87674	0.469647	1.54209	0.110329	0.487884	3.82095
1700030C10Rik	69513	0.881128	1.24252	1.46302	1.17412	1.54209	1.65494	1.46365	4.45778
1700030K09Rik	72254	11.8952	6.21261	9.2658	12.2108	9.96427	8.60569	9.10717	8.4061
1700037C18Rik	73261	5.87419	2.39629	9.75347	3.28753	3.44005	6.50944	8.29403	10.4439
1700037H04Rik	67326	23.9373	28.4893	22.3111	16.7899	16.963	19.8593	19.8406	20.7605
1700049G17Rik	73430	0.293709	1.24252	0.853429	0.117412	1.30485	1.43428	1.30102	3.94832
1700052N19Rik	73419	39.5039	52.6297	39.7454	43.0901	32.2653	40.2702	39.8439	51.7102
1700056N10Rik	73392	2.05597	4.34883	4.02331	0.704471	8.65943	3.7512	5.36672	8.78819
1700064E03Rik	74273	6.02104	5.6801	8.04661	5.04871	5.45663	6.39911	6.993	7.51454
1700066M21Rik	73467	10.8672	8.52015	4.6329	7.04471	2.49107	9.70899	10.5708	9.67975
1700086O06Rik	73516	3.96508	4.17132	5.24249	1.87859	8.54081	7.39207	4.39096	4.71251
1700094D03Rik	73545	7.93015	6.83387	9.50964	7.74918	7.82907	9.70899	5.52935	8.15137
1700109H08Rik	77036	1.17484	1.06502	0.243837	1.29153	0.830356	0.110329	1.1384	0.25473
1700112E06Rik	76633	3.2308	2.9288	4.26714	3.40494	7.94769	8.60569	9.10717	4.45778
1700123M08Rik	100503636	1.02798	1.86378	0.487674	1.17412	4.03316	3.64087	1.95154	2.5473
1700123O20Rik	58248	73.2805	89.1953	82.0511	98.6259	85.0522	77.4512	72.5321	85.0799
1810009A15Rik	66276	250.681	227.027	177.757	181.871	115.775	145.966	143.113	133.224
1810011H11Rik	69069	23.3499	22.0104	18.1658	22.6605	34.4005	33.3195	25.6952	17.5764
1810011O10Rik	69068	4.11193	2.84005	0.853429	2.23082	3.2028	2.75824	2.43942	0.382095
1810013L24Rik	69053	92.5185	90.6154	84.9771	75.9655	102.49	87.1602	96.601	94.5049
1810014B01Rik	66263	12.7764	21.3891	10.485	17.4944	14.9464	13.4602	11.7092	10.9534
1810022K09Rik	69126	78.7141	68.605	63.8852	80.0749	47.5675	71.8244	67.328	65.0836
1810024B03Rik	329509	1.32169	1.86378	0.853429	4.34424	1.18622	1.10329	2.9273	2.41994
1810026J23Rik	69773	21.8814	14.3778	27.4316	18.3162	9.60841	22.1762	27.1589	8.4061
1810030O07Rik	69155	52.7208	35.5894	39.1358	31.4664	31.4349	36.7397	26.671	52.2197
1810032O08Rik	66293	7.34274	16.419	7.19319	14.9113	8.06632	6.50944	7.48089	6.36825
1810034E14Rik	66503	5.87419	4.79259	0.609592	2.9353	2.1352	1.21362	2.11416	6.49562
1810037I17Rik	67704	93.987	86.9765	100.339	103.205	86.2384	104.813	106.033	102.147
1810043G02Rik	67884	13.3638	10.2952	13.411	6.80989	14.9464	3.42021	12.3597	16.6848
1810043H04Rik	208501	52.574	48.7246	46.5728	52.8353	57.0573	58.8056	50.9026	51.0734
1810055G02Rik	72056	8.66443	2.21879	8.41237	11.976	1.66071	3.86153	11.7092	6.75035
1810058I24Rik	67705	73.8679	79.6989	70.4688	93.812	80.6632	103.268	79.1998	94.5049
2010012O05Rik	66439	26.8744	20.8566	27.6755	29.94	31.1977	22.8382	24.5568	20.251
2010013B24Rik	72079	2.49653	1.68628	3.16988	3.63977	1.89796	2.64791	1.1384	3.05676
2010107E04Rik	70257	156.547	142.801	138.743	180.579	154.209	197.931	172.06	170.287
2010110K18Rik	100503082	0.440564	5.59135	0.73151	2.9353	1.42347	5.6268	1.62628	2.16521
2010111I01Rik	72061	5.28677	3.19506	7.68086	4.81388	4.86351	9.378	7.96877	10.1892
2010204K13Rik	68355	3.08395	2.5738	2.56029	2.23082	1.54209	0.772306	1.78891	1.52838
2010315B03Rik	630836	2.79024	4.79259	6.09592	5.87059	2.72831	6.06812	6.01724	14.647
2210013O21Rik	70123	15.2729	13.8452	16.0932	21.956	19.0982	16.5494	25.0447	25.6004
2210015D19Rik	76508	30.8395	19.6141	15.3617	23.1301	23.0127	27.6927	26.671	26.1098
2210016F16Rik	70153	153.023	135.08	109.605	127.979	124.553	131.623	126.687	120.869
2210016L21Rik	72357	32.4549	28.7555	24.2618	26.8873	33.5701	24.7138	18.8649	15.5385
2210017G18Rik	70386	0.734274	3.72757	3.2918	1.40894	1.42347	0.882635	2.43942	2.67467
2210018M11Rik	233545	9.98612	10.2952	13.2891	3.17012	9.48978	5.51647	7.96877	16.5575
2210404O09Rik	70081	9.3987	3.10631	13.1672	4.10941	10.0829	19.3076	10.2456	5.34933
2210408I21Rik	72371	2.34968	6.39011	4.14523	3.40494	1.42347	5.18548	3.08993	5.34933
2300009A05Rik	69478	9.25185	9.14141	7.9247	10.4497	6.52423	12.6879	7.15563	5.98616
2310001H17Rik	76432	12.4826	11.0939	5.73016	6.10541	10.9133	11.3639	7.15563	14.647
2310003H01Rik	71885	19.0911	11.0939	7.3151	18.7859	14.5905	15.2255	17.4012	10.4439
2310009B15Rik	69549	9.98612	15.5315	10.9727	10.6845	12.574	18.756	16.5881	13.8828
2310010J17Rik	78329	1.32169	1.95253	0.853429	1.52635	3.55867	3.19955	3.25256	4.20305
2310011J03Rik	66374	93.5464	78.0126	89.9758	90.9942	87.306	88.2635	93.6737	75.1454
2310022A10Rik	66367	7.48959	5.59135	8.77813	3.992	4.86351	3.30988	5.52935	11.0808
2310022B05Rik	69551	7.63644	7.18888	4.51098	8.21883	7.71045	9.04701	3.57782	9.80711
2310033P09Rik	67862	30.8395	41.2695	31.8207	39.8026	27.639	29.0166	30.4114	29.5487
2310035C23Rik	227446	38.1822	55.026	39.7454	68.5685	58.0063	62.9981	50.0894	56.2954
2310036O22Rik	68544	193.114	186.29	171.052	170.482	138.432	167.921	151.569	158.315
2310039H08Rik	67101	19.238	16.5965	16.3371	16.4377	23.6058	21.8452	21.9548	17.5764
2310045N01Rik	72368	10.7204	10.8277	9.50964	13.5024	16.4885	16.1081	15.4497	11.5902
2310047M10Rik	71923	24.3779	26.1817	25.4809	19.373	28.7066	25.9274	35.9408	28.9119
2310057M21Rik	68277	25.8464	15.5315	10.6069	19.7252	5.10076	15.5564	18.0517	16.1754
2310058D17Rik	75694	3.37766	1.77503	1.58494	1.76118	3.08418	2.64791	1.62628	2.41994
2310061I04Rik	69662	27.4618	38.3407	24.1398	21.7212	27.1645	19.9696	26.671	29.1666
2310067B10Rik	71947	3.81822	1.50878	1.21918	2.9353	1.54209	2.97889	2.76468	0.764191
2410002F23Rik	668661	25.259	17.3953	22.7987	21.0167	19.4541	17.5424	19.0275	12.3544
2410003L11Rik	69729	6.31475	3.19506	2.80412	6.22283	2.60969	4.85449	6.50512	2.03784
2410004B18Rik	66421	72.9868	70.2025	62.0565	91.6986	95.8468	59.9089	74.6463	64.5741
2410004N09Rik	69749	19.5317	21.4779	17.922	25.2435	13.2857	17.3217	17.5638	12.8639
2410006H16Rik	69221	60.7978	56.801	49.8646	56.4751	45.4323	54.944	47.9753	50.6913
2410015M20Rik	224904	76.2176	71.1788	70.4688	77.6092	71.5293	92.8974	79.6877	63.1731
2410016O06Rik	71952	41.5599	25.383	46.0852	52.3657	23.6058	26.9204	31.7125	23.4352
2410018L13Rik	69732	3.08395	5.32509	2.43837	4.46165	6.64285	3.53054	3.90307	3.43886
2410019O14Rik	78316	7.7833	5.14759	7.19319	7.984	3.55867	13.7912	5.04147	5.60406
2410089E03Rik	73692	12.9232	16.9516	7.55894	17.3769	15.7768	27.472	8.94454	12.4818
2410127L17Rik	67383	30.5458	30.708	22.5549	25.0087	23.6058	23.6105	29.273	22.5436
2410131K14Rik	76792	19.0911	10.1177	15.2398	12.2108	7.35458	11.9156	11.384	12.227
2500002B13Rik	78353	3.08395	0.532509	2.43837	2.34824	1.54209	0.772306	0.487884	1.65575
2500004C02Rik	72326	5.58048	8.6089	5.48633	10.5671	7.59183	4.74416	4.22833	7.13245
2510002D24Rik	72307	13.6575	18.8153	18.1658	13.972	22.0637	11.1433	27.8094	16.4301
2510003E04Rik	72320	24.3779	37.8969	24.8714	30.4097	27.8762	40.3806	22.28	24.5815
2510009E07Rik	72190	5.87419	2.04129	8.41237	6.34024	15.5395	5.73713	6.83038	6.24089
2510039O18Rik	77034	12.4826	20.3241	21.7015	12.0934	9.72703	16.3288	18.7022	21.9068
2610001J05Rik	66520	101.917	103.129	107.776	108.371	119.334	108.012	129.94	132.714
2610002J02Rik	67513	36.42	36.2994	34.381	37.6892	30.6046	28.0237	32.0377	23.3078
2610002M06Rik	67028	32.1612	33.9031	23.2864	29.8226	33.4515	24.7138	32.0377	33.497
2610005L07Rik	381598	3.52451	4.70383	2.19453	3.17012	2.01658	3.64087	2.27679	2.9294
2610008E11Rik	72128	11.7484	8.07639	2.6822	7.51436	7.47321	4.74416	1.30102	3.94832
2610015P09Rik	212153	13.9512	9.94018	9.75347	15.1461	4.98214	11.5846	12.0345	3.56622
2610020C07Rik	69918	1.90911	1.59753	0.487674	3.87459	1.89796	0.551647	1.46365	1.14629
2610020H08Rik	434234	7.63644	13.934	9.63155	14.6765	9.13392	12.2466	19.3527	5.85879
2610021A01Rik	668572	2.34968	6.74512	4.75482	15.3809	8.89667	4.74416	10.5708	0.891556
2610037D02Rik	70040	0.734274	1.15377	1.3411	1.17412	1.66071	0.330988	2.11416	6.24089
2610044O15Rik8	72139	2.05597	2.66255	3.2918	5.75318	3.44005	5.40614	2.60205	3.43886
2610203C22Rik	72481	20.1191	17.7503	14.3864	12.4457	23.7245	21.8452	26.0205	24.8362
2610204G07Rik	72468	1.02798	0.532509	1.70686	0.587059	1.0676	0.882635	2.27679	2.9294
2610301B20Rik	67157	14.6855	22.9867	7.07127	0.821883	30.1301	9.26767	20.6538	6.75035
2610305D13Rik	112422	31.2801	23.6079	18.2878	18.5511	37.9591	29.127	24.5568	23.4352
2610318N02Rik	70458	45.8187	31.2406	37.4289	27.2395	17.4375	23.0588	29.1104	22.1615
2610507B11Rik	72503	190.177	156.025	182.268	151.931	171.528	199.145	158.888	190.156
2610507I01Rik	72203	3.2308	4.61508	8.65621	1.05671	6.28698	2.75824	6.50512	4.07568
2610524H06Rik	330173	20.7065	16.1528	14.0206	24.4217	21.7079	20.8523	20.8164	18.9774
2610528A11Rik	70045	2.64338	3.10631	4.99865	3.40494	2.96556	3.64087	4.55358	3.05676
2700029M09Rik	72612	116.309	126.649	133.013	135.493	132.264	124.01	124.248	148.38
2700038G22Rik	67194	5.72733	5.5026	3.53563	9.62777	6.99872	2.20659	5.36672	4.71251
2700049A03Rik	76967	10.7204	18.6378	20.3604	25.7132	17.2002	26.6997	20.4911	32.7328
2700060E02Rik	68045	408.55	440.119	448.782	467.064	370.695	403.364	411.937	390.883
2700062C07Rik	68046	32.6017	29.5543	32.1865	24.5391	34.6377	29.0166	35.1277	24.8362
2700081O15Rik	108899	1.46855	1.95253	0.609592	0.821883	1.42347	2.09626	3.25256	3.56622
2700089E24Rik	381820	127.617	152.386	143.132	148.526	184.458	146.186	169.621	192.576
2700094K13Rik	72657	290.772	277.526	277.121	320.769	274.255	281.892	257.44	284.279
2700097O09Rik	72658	15.2729	26.0042	20.7261	21.369	20.8775	22.8382	26.3457	23.8173
2700099C18Rik	77022	17.3289	22.6317	12.4357	20.5471	30.0114	20.4109	27.3215	31.4592
2810001G20Rik	66456	3.52451	6.03511	5.36441	11.7412	3.55867	3.19955	5.85461	6.87771
2810002D19Rik	66457	14.5386	16.774	8.90004	24.0694	10.9133	11.0329	14.9618	14.9017
2810004N23Rik	66523	106.176	69.1375	93.6333	92.1683	84.2218	63.2188	81.4766	78.9664
2810006K23Rik	72650	26.287	23.2529	10.7288	27.8266	33.8074	25.1551	10.0829	26.874
2810008D09Rik	76972	7.48959	3.10631	5.36441	3.992	6.64285	4.52351	2.27679	6.24089
2810021J22Rik	69944	8.51757	4.97009	2.31645	0.704471	3.32142	0.330988	3.74044	4.20305
2810025M15Rik	69953	102.358	116.265	99.2416	110.719	112.454	138.463	113.514	120.997
2810403A07Rik	74200	8.22386	10.9164	10.9727	16.6725	21.2334	9.70899	17.2386	15.4112
2810403D21Rik	69964	5.58048	2.39629	6.46168	6.34024	5.338	6.61976	3.08993	8.66083
2810408I11Rik	69941	12.0421	12.3365	10.7288	11.976	8.89667	16.8804	5.85461	10.1892
2810408M09Rik	381406	14.0981	13.0465	18.7754	8.33624	14.3533	9.378	13.1729	20.251
2810417H13Rik	68026	547.181	491.329	576.674	537.277	502.247	528.588	570.336	535.825
2810428I15Rik	66462	50.518	50.8547	44.2564	54.2443	54.329	53.1788	57.2451	44.0683
2810429I04Rik	76937	1.76226	0.710013	0.365755	3.63977	1.0676	1.43428	2.11416	5.34933
2810474O19Rik	67246	66.9657	59.3748	45.7194	43.912	63.2257	63.6601	60.9855	64.9562
2900008C10Rik	72937	1.32169	0.0887516	0.121918	1.87859	1.18622	0.220659	1.30102	1.52838
2900026A02Rik	243219	4.25879	6.92262	5.48633	7.27953	11.8622	10.8123	14.3113	11.2081
2900076A07Rik	100504421	1.46855	0.976267	0.487674	0.587059	2.84694	1.76527	1.95154	2.80203
3000002C10Rik	378954	0.734274	2.9288	4.02331	1.05671	4.15178	0.441318	0.162628	0.382095
3010003L21Rik	109163	1.02798	2.66255	2.80412	0.821883	1.66071	1.21362	0.325256	1.27365
3010026O09Rik	68067	8.51757	8.2539	7.9247	11.1541	10.4388	13.6808	5.52935	4.45778
3110001I22Rik	66598	11.3078	3.55006	7.07127	6.57506	6.52423	2.75824	9.75768	9.93448
3110002H16Rik	76482	33.6297	22.0991	25.1152	18.4337	30.9604	22.5072	16.4254	37.5727
3110007F17Rik	73061	1.76226	1.15377	1.95069	0.352235	1.18622	0.772306	2.43942	0.636825
3110009E18Rik	73103	3.67137	3.99382	3.90139	6.45765	2.96556	4.85449	7.31826	4.45778
3110040N11Rik	67290	30.2521	31.6843	29.1385	40.9767	27.2831	32.7678	39.5186	45.8514
3110043O21Rik	73205	43.9096	30.8855	37.4289	32.9927	38.4336	31.2232	42.1207	36.9359
3110045C21Rik	67303	5.43362	4.08257	3.2918	0	3.44005	0.992965	3.57782	1.40102
3110053B16Rik	382686	2.93709	3.28381	1.82878	1.996	1.18622	2.20659	4.87884	4.58514
3110056K07Rik	73204	3.81822	11.804	5.73016	5.988	5.10076	6.61976	6.993	6.36825
3110057O12Rik	269423	12.4826	8.69765	15.6056	10.0974	6.4056	8.71602	4.71621	21.9068
3110062M04Rik	78412	10.8672	11.804	12.3138	14.4417	13.4043	10.4813	6.50512	10.826
3110082I17Rik	73212	58.7419	65.8537	71.5661	54.2443	44.1275	65.0944	52.3662	58.5879
3300002I08Rik	69277	0.293709	0.798764	0.487674	2.23082	5.93112	0.330988	1.95154	1.01892
3300005D01Rik	78512	3.81822	4.88134	5.60825	3.63977	7.23596	9.48833	4.87884	10.0618
3830403N18Rik	70691	7.63644	14.9103	12.3138	18.3162	12.574	9.04701	1.95154	11.2081
3830406C13Rik	218734	29.5178	16.1528	19.0193	20.3122	21.1148	24.4931	34.6398	22.2889
4632404H12Rik	74034	4.25879	3.10631	1.3411	0.939295	2.96556	4.74416	2.60205	4.33041
4632415L05Rik	70808	2.34968	3.90507	10.3631	3.05271	3.91454	4.96482	3.25256	7.76927
4632427E13Rik	666737	13.9512	7.01137	22.1891	16.7899	18.7423	16.5494	14.7992	19.7416
4632428N05Rik	74048	160.365	100.556	112.531	129.505	132.382	128.754	122.296	125.582
4833417C18Rik	73906	0.881128	0.443758	1.82878	1.52635	0.237245	1.21362	1.1384	0.127365
4833420G17Rik	67392	35.9794	32.2168	28.5289	42.6205	30.3673	25.3758	44.5601	30.4403
4833439L19Rik	97820	17.0351	15.709	18.8974	11.0367	16.6071	9.92965	20.3285	10.6987
4921524J17Rik	66714	23.0562	29.4655	32.4303	24.3042	31.1977	30.8922	28.2973	44.7051
4921531C22Rik	66730	3.81822	2.13004	4.26714	3.28753	0.237245	2.31692	2.43942	1.52838
4921536K21Rik	67430	1.02798	0.355006	1.09727	1.05671	2.01658	0	2.11416	0.127365
4930402H24Rik	228602	4.99306	7.36638	7.55894	9.04071	8.54081	8.27471	9.59505	6.11352
4930427A07Rik	104732	18.5037	14.4665	13.5329	6.69247	21.7079	8.60569	9.59505	8.91556
4930430F08Rik	68281	5.58048	9.31892	3.90139	6.57506	5.338	7.39207	3.41519	4.83987
4930439A04Rik	78119	3.08395	1.95253	2.92604	2.46565	4.74489	3.08922	3.57782	4.71251
4930447C04Rik	75801	12.9232	4.26008	3.04796	6.34024	7.59183	6.95075	9.10717	7.51454
4930453N24Rik	67609	63.8818	65.2324	43.403	54.5965	37.4846	45.897	50.7399	43.5589
4930486L24Rik	214639	1.32169	2.5738	1.09727	0.352235	4.2704	1.21362	0	5.34933
4930503L19Rik	269033	17.182	10.9164	26.2125	13.972	17.2002	13.9015	14.6365	15.2838
4930506M07Rik	71653	10.7204	3.37256	9.87539	5.87059	11.7436	22.1762	8.61929	11.0808
4930513N10Rik	319960	2.79024	1.33127	1.09727	5.16612	1.30485	1.54461	1.46365	1.40102
4930518I15Rik	74704	6.90217	4.34883	7.43702	5.28353	12.8112	4.85449	4.0657	4.83987
4930522L14Rik	100041734	11.3078	9.31892	8.65621	10.5671	10.7946	11.4743	14.7992	15.5385
4930526A20Rik	622485	1.02798	4.17132	3.16988	0.234824	1.30485	1.43428	1.30102	1.91048
4930539J05Rik	319587	1.90911	2.30754	1.46302	1.87859	0.593112	1.21362	1.30102	0.50946
4930558J18Rik	75323	3.37766	4.79259	0.487674	0.352235	0.948978	1.54461	6.01724	3.18413
4930579G24Rik	75939	30.3989	12.869	16.9467	14.7939	13.2857	19.749	13.4981	16.3027
4930581F22Rik	78934	0.881128	4.52633	0.365755	4.22683	2.49107	2.31692	2.43942	1.78311
4931406C07Rik	70984	43.0284	48.8134	48.0359	42.7379	35.5867	33.6505	53.0167	48.7808
4931406P16Rik	233103	1.46855	2.48504	2.43837	2.23082	3.91454	0.330988	1.95154	1.01892
4931414P19Rik	74359	0.881128	1.24252	3.77947	1.87859	1.0676	1.21362	2.76468	2.03784
4931428F04Rik	74356	0	2.21879	0	5.40094	0.118622	2.75824	3.08993	0
4931440P22Rik	71004	0.881128	2.13004	1.70686	2.81788	3.32142	1.32395	3.57782	2.9294
4932438A13Rik	229227	29.2241	35.3231	25.7248	46.0254	45.9068	31.7749	51.8783	26.2372
4933404O12Rik	66752	2.64338	0.710013	1.3411	3.75718	0.474489	0.551647	1.78891	0
4933407K13Rik	74396	5.43362	1.59753	1.09727	0.704471	2.84694	1.8756	4.22833	8.78819
4933423P22Rik	71158	9.3987	7.89889	11.0946	17.4944	20.9961	13.7912	18.377	23.9446
4933426M11Rik	217684	32.4549	28.578	37.5509	34.9887	43.7716	53.0684	51.0652	42.6673
4933427D14Rik	74477	7.63644	9.14141	10.8507	10.4497	12.8112	9.59866	8.78191	8.53346
4933428G20Rik	100141474	1.32169	2.39629	1.3411	0.469647	2.96556	3.7512	2.60205	2.29257
4933434E20Rik	99650	602.692	597.919	574.48	505.458	620.988	550.433	474.874	514.81
4933439C10Rik	74476	2.34968	2.48504	3.04796	3.87459	3.79591	13.5705	5.2041	1.91048
5031414D18Rik	271221	6.90217	8.6089	3.90139	3.40494	4.86351	5.29581	13.6608	1.40102
5031425E22Rik	269630	3.52451	1.06502	7.3151	4.9313	5.10076	4.30285	8.94454	5.85879
5031425F14Rik	319684	0.293709	1.68628	1.3411	0.352235	0.593112	2.64791	3.74044	1.65575
5031434O11Rik	100039684	0.440564	1.15377	3.2918	1.40894	1.0676	2.09626	0.975768	1.78311
5031439G07Rik	223739	34.364	28.4893	22.3111	44.0294	35.3494	34.7538	36.1034	51.7102
5330426P16Rik	68190	0.881128	1.42003	3.04796	2.11341	1.77933	1.8756	4.22833	2.67467
5430403G16Rik	77200	4.25879	2.9288	0.121918	4.10941	8.89667	4.19252	6.50512	1.27365
5430405H02Rik	74487	1.32169	0.798764	1.3411	1.52635	1.18622	0.882635	3.25256	1.40102
5430416N02Rik	100503199	6.46161	4.52633	3.41372	9.04071	3.2028	6.95075	4.39096	9.04292
5430427O19Rik	71398	16.3009	14.0227	18.5316	9.62777	27.639	19.087	10.4082	7.76927
5430435G22Rik	226421	35.0983	19.7916	27.4316	19.8426	34.9936	28.0237	27.6468	33.3697
5530601H04Rik	71445	11.3078	18.7266	8.90004	12.0934	14.4719	13.9015	11.2213	17.1943
5730409E04Rik	230757	2.49653	1.15377	3.04796	5.04871	0.593112	3.97186	2.9273	2.5473
5730455P16Rik	70591	14.5386	25.6492	21.4576	30.1748	5.69387	28.2443	28.2973	31.8413
5730508B09Rik	70617	6.02104	2.13004	2.92604	3.40494	6.88009	8.27471	5.52935	6.62298
5830415F09Rik	74753	16.154	19.2591	9.75347	14.6765	9.84565	10.5916	13.1729	15.2838
5830417I10Rik	100302730	9.83927	8.87516	14.7521	19.6078	8.65943	9.92965	13.6608	10.1892
5830428H23Rik	414758	11.4547	13.579	11.2165	6.34024	13.6416	10.4813	18.0517	11.2081
5830432E09Rik	67765	0.881128	0.532509	1.95069	2.58306	3.32142	1.43428	4.87884	3.69359
5930403N24Rik	320504	0.293709	0.0887516	1.21918	1.40894	1.18622	1.10329	1.46365	2.29257
6030458C11Rik	77877	49.3432	55.8247	69.3716	57.4144	81.019	75.2447	67.328	54.2575
6230400D17Rik	76133	2.64338	1.15377	2.6822	1.17412	3.67729	0.882635	1.78891	1.40102
6330408A02Rik	321008	6.02104	2.5738	4.99865	3.40494	7.11734	1.10329	5.2041	4.20305
6330416G13Rik	230279	32.7486	50.6772	35.7221	41.4464	59.9043	42.3665	36.266	48.3987
6330418K02Rik	69004	4.11193	2.39629	2.07261	4.10941	2.49107	1.10329	4.0657	2.41994
6330419J24Rik	320237	4.40564	0.443758	0.853429	3.52235	4.50765	1.32395	5.04147	0
6430548M08Rik	234797	3.37766	4.08257	4.14523	5.63577	6.76147	5.07515	6.66775	2.67467
6430562O15Rik	320893	0.881128	1.59753	1.21918	2.70047	1.77933	3.53054	3.08993	1.14629
6430590A07Rik	619719	4.11193	1.06502	2.43837	0.821883	8.30356	7.61273	5.2041	6.36825
6530409C15Rik	76224	0.293709	4.52633	0.73151	1.996	2.01658	1.8756	3.41519	1.14629
6720427I07Rik	109186	1.90911	1.24252	2.19453	3.28753	1.66071	1.65494	2.76468	0.50946
6720489N17Rik	211378	0.587419	2.13004	2.92604	1.64377	1.89796	1.76527	0.325256	1.01892
6820431F20Rik	547150	2.79024	4.17132	5.974	5.51836	5.10076	4.85449	4.87884	4.83987
8030462N17Rik	212163	0.734274	2.5738	0.243837	1.17412	4.38903	0.882635	1.62628	2.41994
8430419L09Rik	74525	2.20282	1.86378	6.82743	0.117412	2.37245	0.220659	0.487884	2.29257
8430429K09Rik	71523	7.04903	0.710013	6.58359	6.57506	8.06632	5.51647	1.95154	7.51454
9030025P20Rik	100041574	3.96508	4.61508	3.90139	2.58306	3.79591	2.42725	2.9273	2.41994
9030407P20Rik	100504389	1.32169	0.443758	0.121918	0.117412	2.37245	4.52351	2.9273	0
9030624J02Rik	71517	35.9794	25.1167	33.8933	21.7212	51.4821	37.7327	20.8164	41.2663
9130008F23Rik	71583	0.293709	2.66255	6.21784	2.11341	2.49107	3.53054	5.04147	6.36825
9130011E15Rik	71617	9.83927	4.43758	5.60825	5.75318	12.3367	3.42021	6.01724	5.85879
9130019O22Rik	78921	2.20282	3.10631	4.87674	2.9353	0.830356	2.53758	1.78891	1.27365
9130020K20Rik	108858	8.95814	19.7029	11.948	6.9273	16.7257	13.2395	21.7922	17.0669
9130023H24Rik	100043133	23.9373	19.0816	14.6302	19.7252	20.2844	14.3428	13.0102	14.647
9130221H12Rik	77124	1.6154	3.63881	2.80412	4.69647	5.57525	3.97186	1.62628	3.56622
9130230L23Rik	231253	3.37766	3.28381	2.56029	2.46565	4.98214	6.95075	7.64352	7.64191
9130401M01Rik	75758	64.0287	71.2675	61.0811	59.9974	44.602	48.3243	49.6015	51.4555
9230114K14Rik	414108	6.02104	9.14141	6.46168	3.05271	7.35458	5.95779	4.0657	3.31149
9330133O14Rik	100689703	17.3289	21.7441	25.6029	22.7779	25.1479	24.7138	23.7437	34.0065
9330136K24Rik	319870	2.20282	2.48504	1.3411	3.17012	1.77933	1.65494	3.74044	0.891556
9330151L19Rik	414085	1.6154	1.68628	2.43837	1.87859	4.03316	3.86153	1.1384	2.80203
9330160F10Rik	791118	0.734274	1.24252	1.21918	2.46565	1.54209	0.220659	0.975768	1.52838
9430002A10Rik	77265	0.440564	1.33127	0.121918	0.587059	0	1.54461	1.46365	1.91048
9430008C03Rik	68108	15.8603	12.6915	8.29045	14.7939	12.0995	5.40614	10.8961	14.647
9430015G10Rik	230996	10.133	11.804	13.1672	9.27553	14.3533	14.3428	9.92031	12.3544
9430016H08Rik	68115	63.1475	53.7835	40.7207	54.2443	54.4476	48.214	48.4632	52.9839
9430020K01Rik	240185	3.08395	1.06502	3.16988	0.939295	0	1.21362	2.27679	1.27365
9430025C20Rik	442813	2.05597	5.59135	4.02331	4.81388	8.89667	9.26767	3.41519	2.9294
9430038I01Rik	77252	32.1612	23.6079	32.5522	25.361	24.4362	21.5142	22.1174	24.4541
9430069I07Rik	77358	2.20282	1.33127	0.365755	0.704471	2.01658	0.882635	1.46365	2.5473
9430091E24Rik	434350	1.46855	1.68628	3.2918	1.76118	1.66071	0.551647	3.08993	4.07568
9530027J09Rik	100500713	2.20282	1.86378	2.19453	2.9353	1.30485	2.09626	4.22833	2.9294
9530068E07Rik	213673	79.7421	72.865	79.247	57.6492	65.5981	60.1295	53.9925	79.0937
9530082P21Rik	638247	4.99306	6.65637	2.92604	8.10142	6.64285	3.42021	5.04147	2.16521
9630033F20Rik	319801	12.3358	14.4665	11.5822	11.976	13.9974	11.8052	12.8476	10.826
9830144P21Rik	414086	15.8603	26.8917	20.3604	17.4944	20.5217	15.2255	25.2073	20.7605
9830147E19Rik	208111	0	0.177503	3.65755	2.11341	4.2704	0.661976	11.8718	6.36825
9930012K11Rik	268759	7.19588	4.79259	5.12057	3.17012	4.38903	3.53054	4.22833	4.07568
9930014A18Rik	320469	0.881128	1.68628	0.487674	4.57906	0.237245	3.97186	2.60205	3.82095
9930021J03Rik	240613	9.83927	17.7503	16.459	17.6118	15.065	6.50944	11.384	7.00508
9930104L06Rik	194268	10.8672	9.49642	7.43702	5.988	14.2347	5.6268	7.80615	10.4439
9930111J21Rik1	667214	2.79024	1.68628	0.73151	2.46565	1.18622	1.54461	3.25256	0.891556
9930111J21Rik2	245240	11.6015	12.6915	27.0659	22.0734	21.9451	26.1481	27.6468	24.4541
A130010J15Rik	319266	39.0634	40.6482	51.2057	49.5478	32.2653	33.0988	25.5326	50.6913
A130051J06Rik	791370	1.02798	4.17132	0.853429	1.52635	2.1352	1.10329	0.81314	3.43886
A230005M16Rik	654807	1.32169	1.24252	1.3411	0.704471	0.948978	1.10329	1.1384	1.01892
A230046K03Rik	319277	99.4206	131.707	115.091	123.4	100.71	126.768	144.576	117.431
A230050P20Rik	319278	5.72733	1.77503	6.70551	3.63977	4.2704	3.64087	6.01724	3.56622
A230056P14Rik	320845	2.49653	3.81632	2.6822	5.87059	0.830356	1.65494	2.43942	1.40102
A230072C01Rik	320742	3.52451	0.443758	1.09727	1.64377	1.30485	1.8756	0.81314	0.382095
A330040F15Rik	74333	2.64338	10.9164	7.19319	7.27953	12.9298	8.71602	13.0102	12.4818
A430005L14Rik	97159	67.7	84.2252	86.5621	70.6819	87.306	81.0921	66.3522	73.8718
A430033K04Rik	243308	1.6154	0	0	0	4.74489	1.8756	0.325256	0
A430046D13Rik	654440	1.90911	3.72757	2.56029	3.17012	5.10076	1.98593	2.9273	5.4767
A430057M04Rik	319486	1.17484	1.59753	1.09727	1.52635	0.711734	1.32395	0.81314	0.382095
A530017D24Rik	100504229	3.52451	5.59135	4.38906	5.40094	4.50765	5.40614	5.04147	1.78311
A530054K11Rik	212281	4.5525	2.39629	5.48633	11.8586	9.96427	4.85449	15.6123	5.73143
A630001G21Rik	319997	13.2169	15.4428	11.5822	10.0974	12.0995	11.9156	16.4254	16.1754
A630033H20Rik	213438	11.4547	10.7389	18.2878	14.4417	11.0319	11.1433	23.7437	23.5625
A630052C17Rik	320757	5.13991	0.532509	1.46302	0.117412	0.830356	0	6.50512	4.71251
A830005F24Rik	442803	0.734274	1.24252	1.3411	0	1.30485	0.220659	0	1.27365
A830010M20Rik	231570	1.46855	2.21879	2.31645	0	2.37245	2.86856	1.78891	3.94832
A830080D01Rik	382252	34.0703	29.8205	35.1125	35.4584	27.8762	33.6505	45.048	32.9876
A930004D18Rik	77940	0.734274	2.39629	3.2918	4.34424	3.32142	3.97186	3.41519	3.18413
A930005H10Rik	68161	1.76226	2.66255	2.19453	2.81788	1.30485	2.31692	2.43942	1.91048
A930006K02Rik	100503120	1.32169	5.05884	0.853429	4.22683	1.0676	2.53758	3.41519	2.80203
A930039A15Rik	791276	0.734274	2.39629	2.31645	2.81788	2.72831	1.21362	1.30102	1.78311
AA414768	245350	5.72733	4.17132	0.73151	4.10941	0.711734	3.30988	0.975768	1.40102
AA465934	613254	4.99306	5.76885	4.26714	6.34024	6.76147	4.08219	6.993	5.98616
AA474331	213332	2.34968	2.04129	3.53563	0	4.2704	1.8756	4.87884	0.382095
AA474408	767812	12.1889	6.03511	10.485	11.6238	5.338	2.53758	6.01724	4.45778
AA987161	100416706	11.6015	30.353	16.9467	19.4904	22.8941	12.7982	12.0345	24.8362
AB124611	382062	21.0002	17.5728	35.3563	19.96	58.5994	42.1458	46.9995	61.8994
AF251705	140497	17.9163	19.1703	9.50964	16.7899	38.9081	68.5146	29.7609	52.4744
AI314180	230249	73.7211	81.829	110.824	102.383	113.284	86.1673	96.7637	98.5806
AI413582	106672	92.3716	92.4791	73.6387	85.0062	80.4259	100.731	95.9505	93.9954
AI467606	101602	24.6716	32.2168	40.355	34.6365	20.2844	18.8663	23.7437	13.6281
AI504432	229694	2.93709	1.42003	3.65755	4.10941	0.237245	3.30988	6.01724	0.25473
AI597479	98404	26.287	28.6668	19.7508	27.4744	17.4375	20.9626	20.1659	19.2321
AI606181	226118	2.34968	2.84005	10.6069	2.70047	6.64285	6.06812	4.87884	1.78311
AI607873	226691	37.1542	33.8144	30.7234	44.6165	65.4795	68.7352	83.4282	75.018
AI662270	100043636	8.22386	8.4314	12.6795	6.69247	9.60841	5.29581	8.61929	6.49562
AI837181	107242	5.58048	1.95253	4.75482	2.23082	2.84694	4.85449	7.15563	5.73143
AI846148	68229	0.881128	4.97009	3.65755	2.58306	1.30485	1.32395	3.57782	1.27365
AI987944	233168	8.81128	8.6089	12.9234	18.0814	16.1326	13.6808	13.6608	48.2714
AK010878	100233175	25.5527	20.1466	21.3357	15.8506	28.588	25.3758	22.7679	25.6004
AU019823	270156	34.6577	25.0279	26.3344	22.5431	27.7576	30.0096	32.0377	24.8362
AU020206	100504230	7.19588	10.1177	4.99865	6.69247	5.93112	10.2606	8.61929	5.98616
AU022252	230696	16.0072	17.3066	20.6042	9.86259	28.4694	15.6668	21.9548	14.9017
AU040320	100317	6.46161	10.1177	6.70551	7.39694	7.23596	10.2606	5.52935	8.66083
AU041133	216177	3.37766	3.01755	0.609592	0.117412	4.38903	3.30988	3.74044	2.9294
AW146154	101835	11.161	10.9164	4.51098	1.29153	6.99872	9.26767	4.55358	3.31149
AW209491	105351	19.238	25.9155	31.4549	21.0167	26.2155	28.5753	14.1486	22.7984
AW549877	106064	9.3987	7.81014	1.58494	2.70047	8.18494	9.70899	13.8234	8.91556
AW554918	225289	5.72733	2.13004	7.3151	3.992	8.77805	10.1503	7.64352	4.58514
AY036118	170798	1.17484	2.7513	2.07261	2.23082	1.54209	3.42021	2.43942	2.29257
Aaas	223921	50.2243	34.3469	38.1605	32.7579	40.9247	45.1247	23.7437	29.294
Aacs	78894	14.9792	16.3303	9.2658	23.5998	17.912	19.5283	11.5466	29.4213
Aaed1	66129	21.1471	26.1817	20.7261	23.0127	25.741	18.3147	19.0275	24.7088
Aagab	66939	87.0848	93.2779	79.125	85.4758	91.3392	97.2002	86.6807	95.2691
Aak1	269774	0.734274	2.66255	1.21918	2.23082	4.50765	2.86856	2.60205	2.29257
Aamdc	66273	9.69241	10.4727	19.385	11.976	10.0829	12.5776	12.8476	12.8639
Aamp	227290	161.981	134.459	148.009	135.963	127.875	123.79	122.947	138.573
Aar2	68295	29.2241	16.8628	21.5796	11.3889	18.1492	13.4602	14.3113	19.2321
Aars	234734	175.491	176.349	197.995	169.425	110.437	147.621	159.213	149.527
Aars2	224805	36.7137	20.5904	30.2358	25.361	37.9591	21.7349	26.8336	22.0342
Aarsd1	69684	9.83927	10.3839	8.41237	12.4457	13.5229	11.8052	6.66775	13.5007
Aasdh	231326	15.2729	12.6915	21.8234	19.4904	30.7232	21.7349	16.5881	10.6987
Aasdhppt	67618	70.6371	69.0487	67.4209	79.0182	60.9719	61.1225	40.8196	62.5363
Aatf	56321	85.7631	101.621	100.095	102.383	75.2065	86.0569	67.1654	84.5704
Abca1	11303	14.2449	14.999	17.1905	20.5471	31.1977	68.4042	28.6225	37.8274
Abca3	27410	5.28677	6.03511	6.46168	4.81388	20.9961	8.27471	8.45666	11.9723
Abca7	27403	4.40564	2.04129	7.80278	7.16212	4.38903	9.59866	7.64352	10.3166
Abca9	217262	18.3568	25.0279	30.6015	19.373	32.3839	27.2514	26.0205	36.9359
Abcb10	56199	9.3987	13.4902	10.7288	12.9153	28.4694	14.0118	19.5154	14.647
Abcb1b	18669	19.8254	9.67392	16.9467	16.3202	22.7755	16.3288	18.8649	12.8639
Abcb6	74104	19.9722	33.1931	13.411	11.6238	12.0995	14.4532	7.80615	3.31149
Abcb7	11306	38.9165	31.8618	26.822	34.9887	31.6722	31.0026	30.4114	28.9119
Abcb8	74610	26.5807	18.8153	22.1891	13.6198	27.1645	11.9156	14.6365	10.3166
Abcc1	17250	28.1961	25.2054	38.7701	27.0047	53.8545	29.0166	33.1761	36.1717
Abcc3	76408	2.34968	2.13004	1.70686	1.52635	2.1352	5.07515	2.27679	3.56622
Abcc4	239273	1.17484	1.06502	0.853429	2.11341	4.03316	1.8756	2.11416	3.05676
Abcc5	27416	27.0213	29.7318	24.5056	31.2315	21.9451	20.7419	17.8891	20.7605
Abcd1	11666	5.43362	11.804	13.5329	11.5064	12.4553	12.6879	13.0102	10.4439
Abcd2	26874	53.8957	60.7061	33.6495	51.1916	39.5012	30.1199	52.041	52.0923
Abcd3	19299	27.6087	39.0507	38.7701	46.4951	39.5012	44.3524	27.8094	59.2248
Abcd4	19300	22.1751	16.1528	19.7508	6.45765	9.96427	27.0307	13.0102	19.9963
Abce1	24015	211.324	232.618	182.146	223.2	130.959	131.071	137.583	134.88
Abcf1	224742	212.499	200.135	205.311	210.402	183.034	170.349	200.846	177.292
Abcf2	27407	101.036	75.9714	82.4168	70.7993	61.4464	53.9511	64.5633	62.5363
Abcf3	27406	43.7627	29.4655	70.9565	56.7099	58.4808	39.9392	44.2348	29.4213
Abcg1	11307	22.0282	19.4366	19.9946	11.5064	47.6862	54.3924	26.5084	45.7241
Abcg2	26357	88.5534	112.448	86.3182	85.4758	96.7958	63.1084	73.9958	71.8339
Abcg3	27405	59.1824	83.6927	50.4742	59.4104	76.63	74.362	76.2725	69.2866
Abhd10	213012	15.126	25.1167	17.8001	23.7172	26.4528	26.4791	16.7507	25.9825
Abhd11	68758	64.0287	51.7422	63.0318	62.2283	54.8035	49.6482	51.3905	42.5399
Abhd12	76192	164.624	164.102	150.447	143.242	206.996	182.926	160.351	232.059
Abhd13	68904	13.0701	16.6853	16.0932	10.2148	21.352	16.5494	24.2316	27.3835
Abhd14a	68644	32.0143	26.1817	30.3577	28.2962	10.3201	26.2584	21.9548	23.4352
Abhd14b	76491	3.67137	0.0887516	5.12057	1.29153	4.03316	0.772306	4.55358	3.05676
Abhd15	67477	4.25879	2.13004	10.485	2.11341	11.0319	4.41318	5.69198	9.29765
Abhd16a	193742	44.3501	47.7483	44.9879	39.0981	54.9221	40.0496	38.2176	50.0545
Abhd17a	216169	31.1332	32.4831	28.2851	23.5998	20.403	15.4461	28.2973	36.9359
Abhd17b	226016	13.2169	27.4242	21.3357	22.0734	33.926	26.9204	20.3285	34.3886
Abhd17c	70178	10.7204	11.449	14.3864	10.3322	5.45663	17.8734	22.1174	14.5196
Abhd2	54608	7.93015	4.97009	3.77947	4.34424	5.45663	5.07515	6.993	4.58514
Abhd4	105501	4.69935	3.10631	4.51098	1.64377	6.16836	3.30988	4.0657	2.5473
Abhd5	67469	22.3219	29.5543	16.9467	20.7819	27.639	18.425	13.8234	16.3027
Abhd6	66082	17.0351	34.5244	19.2631	20.0774	32.5025	31.2232	13.3355	19.3595
Abhd8	64296	3.08395	5.05884	6.09592	7.984	2.72831	5.18548	3.41519	5.60406
Abi1	11308	120.421	161.262	147.887	142.068	156.581	170.238	151.732	170.669
Abi2	329165	108.672	119.726	138.255	119.525	142.584	120.48	120.345	110.426
Abi3	66610	9.10499	9.05266	8.77813	6.69247	4.2704	7.83339	7.80615	4.20305
Abl1	11350	18.7974	13.1352	28.0412	16.0854	20.403	13.0189	18.5396	10.1892
Abl2	11352	89.1408	97.9817	110.092	102.618	69.6313	83.1884	90.0959	105.84
Abr	109934	18.21	17.4841	28.0412	26.6525	44.1275	19.1973	26.8336	23.6899
Abracl	73112	166.68	174.841	177.513	172.713	188.609	216.687	252.887	214.61
Abt1	30946	14.9792	15.0878	10.485	14.5591	14.8278	15.0048	15.7749	14.7744
Abtb1	80283	16.0072	9.76267	19.385	6.80989	24.4362	16.1081	15.6123	7.13245
Abtb2	99382	1.17484	0	3.2918	0.117412	2.1352	0	0.487884	0
Acaa1a	113868	168.295	136.677	132.403	124.339	163.936	161.522	164.58	131.696
Acaa2	52538	155.372	176.172	157.884	102.501	152.904	133.94	141.486	182.387
Acaca	107476	6.02104	8.96391	16.2151	7.04471	10.2015	4.30285	19.678	9.04292
Acad11	102632	12.7764	8.52015	11.5822	5.988	12.0995	12.6879	16.1002	9.80711
Acad12	338350	1.17484	1.24252	3.2918	2.58306	1.18622	0	3.74044	0
Acad8	66948	46.9935	48.9909	68.5181	57.7666	48.3979	49.2069	64.5633	62.6636
Acad9	229211	81.7981	107.301	83.1484	77.3744	82.7984	81.2024	81.8019	97.5617
Acadl	11363	78.1267	83.959	91.3169	113.537	146.38	114.522	114.328	111.444
Acadm	11364	115.722	104.727	106.435	128.801	102.371	122.355	105.546	107.496
Acads	11409	75.1896	76.3264	57.6674	72.7953	56.3456	45.1247	53.9925	58.4606
Acadsb	66885	16.0072	9.14141	6.94935	10.5671	18.3865	15.1151	14.3113	23.5625
Acadvl	11370	38.6228	46.7721	43.403	27.5918	45.9068	34.3124	45.048	48.9082
Acap1	216859	0.293709	0.0887516	0.487674	4.69647	2.1352	1.43428	1.62628	0.50946
Acap2	78618	64.0287	66.6524	60.5934	74.0869	79.7142	87.4912	80.5009	98.3258
Acap3	140500	3.08395	7.98764	10.8507	3.63977	5.338	3.53054	4.39096	3.43886
Acat1	110446	113.225	104.993	132.769	117.647	148.752	167.701	169.946	147.489
Acat2	110460	78.861	97.7155	55.4729	60.3497	82.917	60.2399	67.9785	64.5741
Acat3	224530	2.79024	1.42003	1.21918	1.76118	1.0676	1.8756	2.60205	1.78311
Acbd3	170760	25.4059	30.708	49.7427	44.2643	49.4655	37.181	33.664	51.0734
Acbd5	74159	37.5948	40.1157	61.203	49.6652	53.2614	53.8408	47.9753	30.0582
Acbd6	72482	76.805	77.1251	60.2277	74.3217	56.5828	50.9722	57.8956	51.8376
Accs	329470	8.95814	9.14141	5.60825	9.04071	6.16836	9.48833	1.62628	11.7176
Acd	497652	15.2729	11.6265	18.6535	9.27553	21.9451	13.4602	16.9133	8.91556
Acer3	66190	71.5182	92.4791	83.7579	97.217	95.7282	91.0218	128.801	100.491
Acin1	56215	97.9521	85.1128	96.6813	104.614	74.6134	81.9748	86.0302	83.2968
Acly	104112	87.966	75.0838	81.3196	63.7546	71.4106	69.2869	72.0442	73.7444
Acn9	71238	17.182	18.0166	16.3371	21.6038	11.3877	10.9226	20.979	4.58514
Aco1	11428	18.3568	12.514	16.7028	11.5064	31.4349	16.5494	15.287	16.5575
Aco2	11429	70.6371	70.735	90.2196	50.6045	63.9374	54.7234	56.1067	42.5399
Acot1	26897	1.32169	1.86378	2.56029	3.17012	2.37245	0.110329	0.81314	7.25981
Acot11	329910	3.08395	5.5026	11.7042	3.05271	3.44005	1.54461	5.52935	4.33041
Acot13	66834	50.0775	49.6121	46.2071	61.9934	57.8877	61.6741	53.1794	62.0268
Acot2	171210	25.9933	39.1394	27.3097	16.0854	29.2997	21.2936	26.1831	27.2561
Acot7	70025	78.1267	73.1313	45.4756	46.0254	24.6734	35.3054	35.7782	31.5865
Acot8	170789	12.7764	11.2715	15.4836	14.3242	15.1837	17.3217	16.2628	20.251
Acot9	56360	138.19	124.163	120.821	126.1	146.973	133.83	120.019	155.64
Acox1	11430	25.8464	15.354	19.0193	13.7372	22.6569	17.8734	11.2213	24.5815
Acox3	80911	13.0701	14.5553	13.6549	4.9313	13.6416	9.26767	5.85461	9.17029
Acp1	11431	163.156	165.61	147.887	157.449	155.988	141.663	136.282	152.074
Acp2	11432	48.0215	54.4935	75.2237	57.5318	71.7665	58.6952	84.5666	82.5326
Acp5	11433	8.81128	7.36638	12.6795	4.22683	10.5574	14.2325	7.31826	7.38718
Acp6	66659	25.1122	30.2643	17.1905	23.4824	15.065	22.5072	17.2386	22.1615
Acrbp	54137	0.293709	0.976267	0	2.11341	1.54209	4.08219	1.46365	1.40102
Acsf3	257633	13.0701	3.01755	8.65621	7.04471	4.03316	7.5024	5.69198	6.24089
Acsl1	14081	22.0282	21.3004	22.433	18.4337	30.8418	25.5964	34.4771	23.3078
Acsl3	74205	20.1191	20.7679	26.7001	24.3042	38.9081	30.3406	40.657	33.3697
Acsl4	50790	122.624	154.073	125.576	131.266	175.087	146.959	163.604	160.48
Acsl5	433256	188.268	183.006	232.62	205.353	226.806	197.49	181.656	154.749
Acss1	68738	59.7699	86.2665	50.4742	59.293	77.579	81.2024	70.9058	77.1832
Acss2	60525	4.69935	0.798764	4.02331	0.587059	0.474489	8.93668	4.22833	1.40102
Actb	11461	10322.6	9511.95	9599.73	9120.2	11549.3	11363.6	12046.7	11672.6
Actg1	11465	1725.1	1392.96	1593.96	1445.93	1501.76	1371.17	1638.64	1443.43
Actl6a	56456	165.799	175.107	145.205	172.478	161.564	161.853	138.722	126.091
Actn1	109711	14.8323	15.4428	13.2891	14.0894	10.2015	16.9907	15.6123	15.1564
Actn4	60595	71.812	69.4037	67.0551	47.0821	80.9004	59.0262	73.5079	57.8238
Actr10	56444	178.282	153.274	152.764	165.551	144.956	138.353	147.829	137.554
Actr1a	54130	83.1198	80.1427	68.2743	65.6332	56.8201	72.9277	64.5633	54.3849
Actr1b	226977	60.5041	87.5091	48.1578	52.7179	47.5675	48.7656	53.9925	35.5349
Actr2	66713	1499.09	1917.74	1392.92	1460.25	2103.29	1667.08	1763.54	2050.71
Actr3	74117	993.913	1050.2	947.916	985.437	1159.3	1065.12	1124.08	1059.3
Actr5	109275	3.2308	12.4252	7.9247	5.04871	3.79591	5.40614	5.69198	5.98616
Actr6	67019	18.9443	18.1053	20.6042	22.4257	17.912	16.9907	17.4012	21.6521
Actr8	56249	38.1822	45.6183	28.8947	36.7499	30.0114	30.1199	29.4357	39.6105
Acvr1	11477	7.34274	13.934	8.04661	4.81388	8.65943	7.06108	16.9133	11.5902
Acvr1b	11479	3.08395	1.95253	3.90139	1.76118	2.96556	7.83339	4.0657	4.33041
Acvr2a	11480	4.84621	7.36638	10.8507	11.2715	5.93112	6.84042	6.17986	4.07568
Acvr2b	11481	1.46855	1.06502	2.6822	1.40894	3.08418	3.30988	3.08993	0.636825
Acvrl1	11482	9.69241	21.6554	8.41237	14.7939	25.3852	11.9156	13.6608	22.1615
Acy1	109652	92.8122	86.444	82.9045	79.9575	56.9387	88.9255	69.7674	71.4518
Acy3	71670	1.02798	0.177503	2.92604	0.469647	0	1.8756	0.975768	0.127365
Acyp1	66204	10.7204	12.6915	12.1918	10.5671	10.9133	11.0329	12.3597	11.0808
Acyp2	75572	1.32169	1.59753	0.365755	1.29153	1.54209	0.551647	2.43942	1.40102
Ada	11486	42.5879	52.9847	33.7714	42.5031	20.403	55.7164	37.5671	49.1629
Adal	75894	4.69935	5.5026	4.6329	5.40094	9.13392	10.9226	6.50512	2.67467
Adam10	11487	338.647	423.611	371.12	350.239	452.188	371.258	378.761	434.442
Adam15	11490	36.8605	37.8969	39.9892	30.9967	45.0765	27.0307	26.9963	37.7001
Adam17	11491	165.946	146.795	188.608	161.441	202.963	180.058	215.97	180.604
Adam19	11492	8.07701	11.2715	10.7288	10.6845	22.6569	9.04701	10.8961	12.227
Adam22	11496	0.146855	3.28381	1.09727	0	0	1.8756	0	4.33041
Adam3	11497	10.133	12.9577	12.6795	11.8586	9.37116	13.0189	10.7334	14.2649
Adam8	11501	2.79024	1.95253	6.70551	2.9353	5.10076	4.96482	2.76468	3.94832
Adam9	11502	48.9026	60.3511	54.6194	48.2563	85.1708	70.5005	60.6603	59.989
Adamts1	11504	19.0911	23.4304	25.6029	11.8586	4.38903	12.5776	5.69198	1.27365
Adamts10	224697	9.3987	12.9577	17.922	10.6845	16.014	12.5776	14.7992	19.7416
Adamts6	108154	17.9163	13.1352	9.2658	14.7939	7.11734	6.39911	15.1244	17.1943
Adap1	231821	18.7974	14.2003	15.7275	12.7979	12.6926	14.2325	14.9618	4.96724
Adap2	216991	53.602	43.1333	66.3236	54.3617	108.658	83.078	78.3867	93.7407
Adar	56417	7.48959	5.76885	4.14523	4.57906	6.64285	9.92965	4.87884	3.56622
Adat1	30947	8.81128	7.63264	6.94935	6.57506	3.32142	6.61976	10.7334	12.3544
Adat2	66757	10.8672	13.4015	14.5083	15.0287	11.2691	12.9085	12.0345	10.6987
Adat3	100113398	11.4547	16.419	11.4603	10.8019	9.96427	9.92965	15.287	13.5007
Adck1	72113	31.4269	40.8257	39.3796	42.0334	34.7563	26.81	32.5256	33.7517
Adck2	57869	3.81822	6.56762	7.19319	5.04871	9.84565	3.97186	6.66775	8.78819
Adck4	76889	8.22386	3.55006	7.43702	4.9313	7.71045	7.72306	8.78191	3.18413
Adck5	268822	38.7696	54.2272	41.818	39.6852	38.4336	32.4368	38.7055	27.3835
Adcy3	104111	2.79024	4.70383	2.80412	1.52635	5.21938	1.76527	5.85461	1.40102
Adcy7	11513	68.4343	69.8475	67.9086	74.9087	74.8507	92.787	71.0684	74.7633
Adcy9	11515	7.04903	4.61508	0.73151	4.69647	3.44005	2.97889	1.1384	2.03784
Add1	11518	45.8187	46.5058	64.9825	58.1189	67.1402	58.0333	63.2623	75.9096
Add3	27360	71.2245	60.8836	65.5921	66.2203	78.528	54.2821	65.7017	73.3623
Adgb	215772	3.2308	2.66255	0.73151	4.69647	10.9133	2.86856	8.78191	6.24089
Adh5	11532	297.968	254.628	263.222	282.493	231.076	212.715	221.987	184.425
Adhfe1	76187	3.81822	3.81632	5.24249	3.63977	3.2028	4.85449	4.71621	1.91048
Adi1	104923	39.2102	35.6781	38.892	38.8633	22.5382	20.08	17.2386	19.2321
Adipor1	72674	104.561	94.4317	100.339	75.3784	86.0012	77.1203	75.4594	95.6512
Adipor2	68465	41.7067	25.6492	50.7181	32.2883	35.9426	34.9744	25.8579	53.366
Adk	11534	125.267	84.5803	105.094	86.5325	81.2563	72.8174	75.7847	96.6701
Adnp2	240442	13.9512	4.97009	13.0453	5.16612	3.32142	8.60569	10.7334	13.7554
Ado	211488	247.744	284.804	245.544	205.94	241.041	254.089	223.126	300.2
Adora2b	11541	7.7833	13.8452	6.33976	8.80589	9.72703	9.59866	7.80615	6.36825
Adora3	11542	4.25879	0.0887516	0.365755	1.64377	5.10076	5.95779	3.90307	2.41994
Adpgk	72141	12.4826	6.92262	17.8001	17.0247	13.8788	9.81932	6.34249	8.27873
Adprh	11544	221.604	226.849	230.913	251.261	208.775	225.624	216.295	207.478
Adprhl2	100206	84.1477	62.6586	66.4455	72.5605	73.7831	64.653	49.1137	66.8667
Adprm	66358	50.0775	52.8959	46.4509	45.5558	41.8737	40.1599	46.349	47.1251
Adrb2	11555	81.5044	87.6866	63.5195	77.257	90.6274	59.1366	76.4352	51.8376
Adrbk1	110355	61.9727	54.8485	49.0112	48.3737	57.8877	56.599	50.5773	47.5072
Adrbk2	320129	3.08395	0.177503	3.04796	0	11.8622	0.220659	7.64352	0.764191
Adrm1	56436	87.5254	67.2737	78.0278	68.0989	62.0395	65.646	75.7847	60.4984
Adsl	11564	333.801	330.955	282.241	293.647	232.144	244.821	211.254	220.978
Adss	11566	195.317	164.279	175.441	164.964	123.96	144.863	156.611	172.707
Adssl1	11565	13.3638	6.92262	18.5316	27.4744	12.6926	14.6738	20.1659	17.1943
Aebp2	11569	29.2241	37.1869	29.3823	38.2763	41.0433	39.7186	43.2591	49.9271
Aen	68048	52.2803	42.3345	44.0125	58.9407	39.0267	55.0544	50.9026	58.5879
Aes	14797	9.69241	11.3602	11.2165	12.7979	19.9285	19.9696	21.4669	15.0291
Afap1	70292	2.34968	1.95253	2.6822	0.352235	1.77933	0.772306	4.87884	4.33041
Afap1l1	106877	20.8534	29.288	15.3617	36.6325	20.8775	22.6175	19.8406	22.0342
Aff1	17355	7.19588	3.01755	12.9234	13.8546	13.5229	4.52351	13.6608	21.6521
Aff4	93736	24.0842	32.2168	38.2824	59.0581	48.042	32.9885	40.9823	39.2284
Afg3l1	114896	116.749	170.226	108.142	125.396	167.969	106.799	106.521	126.601
Afg3l2	69597	98.3927	79.8764	104.484	66.4551	54.5663	85.1743	56.2693	58.2058
Afp	11576	3.2308	0.976267	0.975347	1.29153	9.96427	0	2.60205	0
Aftph	216549	38.7696	31.2406	26.0905	37.924	35.1122	31.1129	29.273	23.3078
Aga	11593	33.4829	33.1931	31.9426	26.6525	51.1262	36.188	24.3942	30.4403
Agap1	347722	2.49653	6.56762	0.365755	3.05271	4.50765	3.86153	3.08993	3.05676
Agap3	213990	20.8534	23.4304	8.29045	18.7859	10.5574	13.5705	19.5154	17.3217
Agbl3	76223	2.79024	3.10631	1.70686	3.40494	4.15178	3.64087	5.04147	12.3544
Agbl5	231093	1.02798	0.710013	1.70686	1.05671	4.2704	2.97889	0.81314	0
Agfg1	15463	10.8672	16.064	21.3357	23.1301	12.2181	20.9626	13.986	13.3733
Agfg2	231801	7.34274	9.76267	14.7521	10.8019	11.8622	11.8052	14.9618	17.0669
Aggf1	66549	87.5254	105.703	94.121	97.0996	92.2882	101.393	101.805	129.785
Agk	69923	32.308	29.8205	30.7234	14.0894	27.4018	19.3076	22.4427	27.7656
Agl	77559	14.8323	7.98764	10.485	16.6725	17.3189	13.2395	15.1244	18.7227
Agmo	319660	4.11193	3.28381	2.31645	1.996	2.72831	1.65494	0.650512	2.67467
Ago1	236511	15.4197	7.98764	5.73016	22.4257	13.2857	18.8663	16.1002	11.9723
Ago2	239528	71.0777	80.6752	69.9812	75.848	75.7997	96.5382	82.1272	92.5944
Ago3	214150	34.6577	23.5192	35.4783	36.9847	65.005	47.6623	31.2246	52.3471
Ago4	76850	0	1.77503	0.853429	3.28753	1.30485	0.661976	2.43942	6.62298
Agpat1	55979	10.5735	13.7565	8.77813	5.63577	7.11734	6.95075	9.92031	5.0946
Agpat2	67512	20.5597	31.5068	34.0152	20.5471	18.3865	14.2325	14.4739	23.9446
Agpat3	28169	10.2798	6.56762	11.4603	13.5024	5.69387	16.6597	7.15563	10.0618
Agpat4	68262	6.1679	12.6915	8.53429	14.0894	8.77805	12.1362	5.52935	13.1186
Agpat5	52123	190.03	205.637	210.675	210.872	196.32	205.764	212.88	190.283
Agpat6	102247	66.0846	35.3231	60.2277	39.8026	54.4476	38.505	58.3835	77.0559
Agps	228061	97.6584	114.312	92.2922	84.7713	120.046	131.844	112.376	90.4292
Agtpbp1	67269	9.10499	4.52633	7.3151	6.80989	9.37116	7.94372	8.61929	6.75035
Agtrap	11610	26.1401	27.9567	27.3097	30.2923	45.4323	28.134	56.7572	31.5865
Ahctf1	226747	44.0564	42.3345	44.5002	68.0989	49.5841	70.9418	67.9785	65.593
Ahcy	269378	101.036	110.673	110.336	79.0182	68.9196	63.3291	77.7362	77.1832
Ahcyl1	229709	20.7065	17.3066	29.2604	34.5191	25.0293	17.432	18.2143	29.8034
Ahcyl2	74340	30.8395	41.5357	38.2824	38.7459	48.5165	48.4346	39.356	43.6862
Ahdc1	230793	1.76226	4.34883	0.975347	1.87859	5.10076	3.19955	0.81314	5.34933
Ahi1	52906	5.13991	4.08257	3.90139	4.10941	2.84694	4.19252	0.975768	6.11352
Ahnak	66395	85.91	111.294	112.531	114.829	133.45	131.402	93.8364	145.196
Ahr	11622	2.20282	0.177503	1.95069	0	3.44005	0.992965	2.76468	3.56622
Ahsa1	217737	562.747	598.186	557.045	547.844	468.084	459.191	494.227	422.597
Ahsa2	268390	52.7208	51.2984	56.6921	54.4791	69.3941	54.2821	55.7814	52.2197
Aida	108909	63.2944	49.8784	58.7647	56.4751	59.667	52.1858	53.8299	48.7808
Aif1	11629	160.512	162.593	167.028	168.251	196.794	218.563	167.507	184.679
Aifm1	26926	90.1688	83.249	97.5347	79.7226	92.0509	68.7352	94.4869	73.8718
Aifm2	71361	1.76226	6.65637	3.04796	6.9273	5.45663	4.08219	4.0657	12.9912
Aig1	66253	5.43362	7.54388	5.974	9.86259	13.6416	17.763	11.5466	9.04292
Aim1l	230806	1.17484	0.177503	1.82878	1.40894	1.66071	0.220659	0.325256	1.52838
Aim2	383619	54.7768	41.8907	54.6194	77.1396	45.9068	49.7586	62.1239	63.6825
Aimp1	13722	146.708	190.816	164.468	166.725	135.585	153.358	143.113	145.451
Aimp2	231872	59.4762	48.4584	44.7441	38.9807	35.1122	34.8641	29.4357	34.3886
Aip	11632	61.0916	68.7825	69.7373	71.9734	69.5127	80.2095	68.629	60.2437
Ajuba	16475	0.440564	1.06502	2.80412	2.70047	6.88009	0.441318	1.1384	0.891556
Ak1	11636	1.32169	4.97009	3.41372	3.63977	3.79591	1.76527	1.95154	5.22197
Ak2	11637	332.626	396.808	353.076	355.406	417.313	359.674	306.229	408.715
Ak3	56248	64.3224	56.446	39.6235	36.3977	25.2666	58.6952	54.1551	43.1768
Ak4	11639	4.40564	9.05266	9.75347	12.9153	8.65943	9.04701	5.2041	0.382095
Ak8	68870	3.2308	4.52633	5.24249	4.46165	6.99872	10.1503	2.9273	0.764191
Akap1	11640	21.4408	25.9155	16.0932	12.4457	8.06632	8.27471	19.0275	9.55238
Akap10	56697	21.4408	29.643	18.6535	31.7012	37.2474	30.4509	39.1934	42.5399
Akap11	219181	9.69241	15.0878	30.3577	7.27953	16.4885	18.094	29.4357	19.9963
Akap12	83397	2.49653	0.443758	3.90139	1.17412	1.0676	2.53758	2.11416	4.83987
Akap13	75547	217.198	198.981	225.793	235.646	318.975	264.018	259.88	301.601
Akap17b	338351	3.37766	2.5738	0.121918	2.11341	5.338	6.95075	5.04147	0.25473
Akap5	238276	8.81128	10.6502	9.75347	15.6158	3.08418	2.31692	8.29403	11.0808
Akap7	432442	8.51757	6.56762	1.09727	1.05671	3.55867	2.09626	2.11416	7.13245
Akap8	56399	113.078	113.868	105.825	117.06	76.3928	98.0828	117.092	118.832
Akap8l	54194	28.0492	34.8794	41.9399	41.329	29.537	28.796	37.4044	14.7744
Akap9	100986	66.8189	60.9723	66.2017	65.3984	80.6632	82.3057	90.7464	78.0748
Akip1	57373	34.9514	39.0507	30.3577	42.0334	53.2614	44.6834	41.3075	45.4693
Akirin1	68050	131.435	163.48	157.275	168.486	189.203	147.952	169.458	170.287
Akirin2	433693	10.8672	23.8742	15.4836	16.7899	17.3189	18.5353	11.8718	18.2132
Akna	100182	13.3638	12.6915	12.9234	11.2715	8.18494	13.0189	12.1971	8.53346
Akr1a1	58810	727.371	702.025	674.94	689.207	873.06	923.898	789.234	840.864
Akr1b10	67861	62.2664	52.0972	61.9345	64.4591	84.3405	64.8737	57.0824	89.9198
Akr1b3	11677	224.981	206.347	222.501	236.937	215.893	214.922	193.527	209.006
Akr1b8	14187	6.31475	6.56762	7.43702	5.04871	13.0485	7.5024	6.993	8.15137
Akr1c12	622402	0.734274	2.13004	1.09727	0	0	0.661976	0.162628	1.65575
Akr1c13	27384	2.20282	2.7513	2.92604	3.40494	0	1.32395	2.43942	3.18413
Akr1e1	56043	46.2592	44.642	39.3796	28.4137	34.1632	38.505	31.8751	26.7467
Akr7a5	110198	47.7278	48.5471	32.5522	46.7299	31.079	43.6904	34.8024	44.1957
Akt1	11651	29.0772	30.0868	26.3344	31.349	43.1785	40.9322	31.7125	22.2889
Akt1s1	67605	16.3009	13.579	23.2864	15.0287	15.1837	9.26767	18.5396	12.227
Akt2	11652	32.1612	20.9454	22.7987	21.956	22.4196	29.127	25.5326	19.1048
Akt3	23797	0	2.9288	5.85208	4.34424	0.355867	2.53758	3.57782	1.91048
Aktip	14339	32.7486	27.6017	37.6728	31.7012	40.6875	40.3806	41.4701	43.6862
Alad	17025	73.4274	66.8299	66.9332	54.8313	47.3303	63.6601	42.9338	49.2903
Alas1	11655	9.69241	14.2003	12.3138	16.2028	19.9285	17.2114	13.0102	7.38718
Alas2	11656	0.881128	1.24252	0.121918	0.704471	6.16836	0.992965	4.87884	1.65575
Alcam	11658	1.17484	4.88134	0.73151	1.76118	0.711734	5.18548	7.15563	1.52838
Aldh16a1	69748	40.385	37.4532	53.8879	36.6325	49.94	46.4487	53.1794	43.0494
Aldh18a1	56454	41.1193	20.5016	28.0412	31.8186	19.6913	23.6105	13.0102	21.9068
Aldh1b1	72535	3.08395	1.50878	1.3411	2.11341	3.44005	6.28878	2.9273	1.27365
Aldh2	11669	87.5254	98.248	104.85	87.4718	125.74	100.951	94.4869	98.7079
Aldh3a2	11671	18.9443	13.224	17.8001	35.6932	12.3367	19.6386	25.8579	20.5058
Aldh3b1	67689	0.293709	3.37256	7.19319	4.46165	6.52423	7.39207	4.0657	5.22197
Aldh4a1	212647	3.96508	3.81632	5.73016	4.9313	7.35458	6.17845	6.83038	4.45778
Aldh5a1	214579	3.2308	1.77503	0	0.704471	2.1352	0.992965	2.76468	7.25981
Aldh6a1	104776	12.7764	6.39011	1.21918	5.63577	18.8609	9.48833	16.1002	16.8122
Aldh7a1	110695	116.603	93.0117	78.0278	90.1723	92.7626	81.7541	63.9128	70.9424
Aldh9a1	56752	195.464	187.088	180.195	172.126	191.219	189.105	159.213	190.029
Aldoa	11674	2083.57	1821.18	1854.5	1755.07	1552.17	1656.15	1627.91	1519.85
Aldoart1	353204	2.49653	2.04129	1.70686	2.46565	2.01658	1.43428	2.11416	2.5473
Aldoc	11676	0.440564	2.39629	0.487674	1.29153	2.25382	0.110329	2.43942	0.50946
Alg1	208211	30.2521	23.8742	32.4303	20.7819	20.6403	22.3969	18.377	21.1426
Alg10b	380959	5.58048	4.88134	3.77947	3.992	3.79591	6.28878	2.11416	5.34933
Alg11	207958	55.5111	37.1869	62.1784	48.4911	48.6351	29.5683	38.8681	53.8754
Alg12	223774	16.3009	7.89889	12.3138	11.5064	8.30356	10.371	6.993	9.67975
Alg13	67574	20.5597	17.3066	26.0905	26.3002	26.2155	34.6434	28.4599	38.0822
Alg14	66789	43.3221	42.3345	42.5495	57.4144	49.1096	42.8078	44.0722	49.9271
Alg2	56737	19.3848	19.8804	16.459	15.2635	24.6734	24.2725	16.5881	30.3129
Alg3	208624	16.5946	13.579	20.2385	14.4417	14.5905	12.5776	11.384	18.3406
Alg5	66248	107.644	124.075	92.1703	145.708	112.928	126.438	105.708	87.4998
Alg6	320438	38.1822	29.288	24.0179	29.1181	24.5548	30.3406	21.3043	32.2234
Alg8	381903	22.4688	15.1765	17.3124	13.2675	10.7946	14.8945	14.6365	13.246
Alg9	102580	24.3779	28.8443	26.944	23.7172	26.69	26.4791	14.7992	19.2321
Alkbh1	211064	17.7694	22.8979	30.4796	21.2515	22.8941	19.8593	26.0205	29.4213
Alkbh2	231642	10.2798	10.7389	9.14388	5.16612	9.96427	6.50944	9.10717	9.29765
Alkbh3	69113	45.8187	52.8072	42.7934	51.309	56.5828	39.0566	50.5773	53.1112
Alkbh4	72041	10.2798	7.63264	12.5576	5.87059	9.25254	8.82635	3.74044	7.51454
Alkbh5	268420	52.8677	55.1147	73.8826	55.1836	53.8545	54.944	48.6258	67.6309
Alkbh6	233065	22.9093	23.6079	25.7248	26.6525	27.8762	30.7819	18.377	20.7605
Alkbh7	66400	26.5807	28.933	26.944	15.7332	26.4528	27.5824	20.0032	23.4352
Alkbh8	67667	30.9863	28.1343	22.0672	20.4297	27.0459	25.4861	30.8993	19.9963
Alms1	236266	8.66443	3.99382	4.51098	9.15812	4.38903	5.84746	7.96877	4.96724
Alox5	11689	20.4128	11.449	15.1179	8.68847	5.69387	3.53054	9.2698	1.91048
Alox5ap	11690	270.8	292.88	248.226	248.913	299.047	297.558	242.316	285.553
Alpk1	71481	3.52451	2.13004	0.121918	7.39694	4.03316	3.19955	3.41519	4.33041
Als2	74018	8.37072	8.07639	4.99865	19.0207	14.7092	13.4602	10.0829	16.048
Alyref	21681	30.9863	42.2458	29.0166	39.0981	38.6709	53.9511	34.6398	33.2423
Alyref2	56009	11.161	7.36638	7.80278	13.5024	9.96427	15.6668	4.22833	13.6281
Amacr	17117	7.93015	7.54388	2.56029	2.58306	5.45663	6.06812	6.34249	3.69359
Ambra1	228361	9.10499	12.159	9.99731	20.6645	10.7946	7.94372	10.4082	9.29765
Amd1	11702	101.77	108.454	121.553	121.286	71.7665	93.449	80.1756	97.5617
Amdhd2	245847	44.0564	41.802	49.7427	53.1876	46.0255	51.5238	45.5358	64.0646
Amer1	72345	12.7764	21.2116	19.5069	13.5024	8.06632	13.7912	12.3597	21.1426
Amfr	23802	54.0425	50.4996	52.5468	40.0374	57.8877	47.883	62.1239	69.9234
Amigo3	320844	1.17484	7.54388	2.19453	2.81788	4.86351	2.09626	0.487884	9.67975
Ammecr1	56068	24.6716	29.5543	28.1632	24.4217	21.1148	15.4461	19.0275	33.497
Ammecr1l	225339	17.4757	15.5315	12.6795	16.7899	11.1505	14.0118	22.4427	24.7088
Amn1	232566	12.9232	10.8277	4.87674	8.9233	13.7602	2.97889	10.0829	12.227
Amotl1	75723	0.146855	1.86378	0.487674	1.17412	3.44005	0	0.162628	3.18413
Ampd2	109674	3.2308	3.37256	5.73016	4.57906	4.98214	4.19252	6.17986	4.07568
Ampd3	11717	1.76226	7.89889	2.07261	1.64377	4.86351	6.73009	13.1729	4.45778
Amz1	231842	12.1889	10.2064	6.82743	4.57906	10.4388	7.28174	7.15563	3.69359
Amz2	13929	20.1191	31.5068	39.3796	32.9927	37.1288	28.0237	26.5084	31.8413
Anapc1	17222	58.7419	47.9259	43.1591	63.7546	47.3303	48.9863	67.0027	54.6396
Anapc10	68999	71.3714	70.9125	69.3716	67.0422	72.3596	75.2447	56.7572	60.4984
Anapc11	66156	73.8679	65.6762	64.3729	84.3017	81.3749	95.104	82.4524	78.5843
Anapc13	69010	24.6716	31.4181	27.4316	30.9967	25.3852	33.2092	31.7125	28.0203
Anapc15	75430	53.7488	54.0497	51.9372	60.8193	61.0905	57.0403	61.1481	63.1731
Anapc16	52717	27.0213	29.3768	30.3577	30.5271	32.8584	36.4087	33.664	41.6484
Anapc2	99152	148.764	152.386	133.379	132.206	123.13	146.848	116.93	123.544
Anapc4	52206	74.0148	67.0074	60.4715	59.1756	71.5293	52.7375	73.5079	65.8478
Anapc5	59008	274.031	231.819	248.714	223.435	255.394	206.095	224.101	216.903
Anapc7	56317	72.8399	76.5039	74.736	83.832	76.7486	68.9559	59.8471	78.2022
Ang	11727	19.238	14.1115	13.411	13.8546	16.963	17.432	16.7507	11.3355
Angel2	52477	40.2382	69.2262	68.762	34.7539	51.1262	69.5075	52.2036	66.3572
Angpt1	11600	0.587419	2.13004	2.80412	1.05671	1.66071	0	0.162628	0
Angpt2	11601	9.54556	5.5026	14.0206	9.62777	8.54081	14.0118	16.1002	9.42502
Angptl3	30924	3.2308	4.97009	2.56029	3.28753	1.0676	4.08219	6.83038	8.53346
Angptl4	57875	80.0358	65.5874	81.4415	60.9367	55.0408	39.7186	49.9268	59.3521
Angptl6	70726	2.05597	4.17132	3.2918	3.75718	6.52423	6.61976	1.62628	0.25473
Ank	11732	2.49653	7.98764	3.65755	6.80989	6.16836	3.64087	4.39096	3.18413
Ank2	109676	8.81128	6.83387	4.51098	7.86659	9.96427	6.39911	4.55358	10.5713
Ankfy1	11736	34.364	53.5172	45.9632	34.4017	46.7372	57.3713	50.9026	51.7102
Ankhd1	108857	63.4412	76.7701	61.4469	63.285	66.7844	66.4183	73.1826	84.3157
Ankib1	70797	10.2798	13.1352	13.8987	14.5591	23.3686	35.1951	20.8164	18.9774
Ankle1	234396	33.6297	50.6772	29.5043	26.8873	32.3839	34.4228	24.3942	22.4163
Ankle2	71782	47.4341	47.6596	57.6674	41.2116	51.3635	45.7867	54.1551	53.366
Ankmy2	217473	38.4759	42.3345	44.6221	33.4624	23.25	27.2514	22.28	30.695
Ankra2	68558	4.25879	7.01137	10.2411	11.8586	4.86351	17.8734	11.8718	4.33041
Ankrd10	102334	62.707	51.2984	71.3223	60.3497	60.9719	71.7141	69.6048	81.641
Ankrd11	77087	95.1618	108.721	126.064	135.728	114.945	151.482	135.144	148.635
Ankrd12	106585	22.7625	18.2828	30.6015	22.4257	24.5548	32.6575	22.9306	36.1717
Ankrd13a	68420	28.7835	18.3716	25.2371	26.8873	17.2002	32.3265	17.5638	28.9119
Ankrd13c	433667	21.4408	19.6141	18.5316	13.8546	20.403	17.5424	16.5881	33.3697
Ankrd13d	68423	5.13991	7.45513	1.70686	1.40894	2.60969	6.06812	1.78891	1.91048
Ankrd16	320816	21.7345	16.5078	23.896	10.6845	28.588	22.1762	25.2073	16.3027
Ankrd17	81702	61.2384	76.8589	90.4635	86.8847	70.5803	62.7774	60.4976	82.0231
Ankrd23	78321	6.31475	1.42003	10.6069	7.984	5.338	7.06108	10.5708	3.05676
Ankrd24	70615	1.6154	1.15377	0.975347	2.34824	3.44005	4.19252	0.487884	1.52838
Ankrd26	232339	17.0351	13.8452	22.1891	20.1948	22.4196	22.7279	13.1729	27.3835
Ankrd27	245886	13.2169	11.2715	15.2398	11.3889	16.8444	6.95075	10.8961	18.2132
Ankrd28	105522	16.5946	7.18888	10.6069	8.21883	12.4553	13.7912	21.7922	14.7744
Ankrd32	105377	22.6156	21.5666	26.3344	21.0167	25.1479	24.1621	22.9306	26.6193
Ankrd37	654824	16.3009	17.9278	28.6508	23.365	12.0995	11.1433	15.4497	11.7176
Ankrd39	109346	17.4757	18.3716	20.2385	18.6685	17.6747	20.5213	13.986	12.6091
Ankrd40	71452	12.4826	23.6967	30.6015	17.3769	11.2691	26.1481	15.7749	17.9585
Ankrd44	329154	22.0282	41.3582	24.7494	21.1341	41.1619	40.3806	43.2591	59.4795
Ankrd46	68839	33.9234	30.353	28.5289	35.928	25.0293	44.1318	19.1901	47.6345
Ankrd49	56503	61.0916	57.5998	55.5948	37.2195	28.9438	42.5872	38.7055	38.5916
Ankrd50	99696	3.2308	1.06502	5.24249	8.9233	2.84694	4.41318	5.36672	3.05676
Ankrd52	237615	4.99306	7.72139	0.73151	8.10142	1.66071	3.19955	4.87884	5.0946
Ankrd54	223690	40.6788	30.5305	43.5249	43.2076	29.7742	27.5824	51.8783	32.096
Ankrd55	77318	2.49653	1.77503	3.16988	0.469647	0	1.98593	0.81314	1.91048
Anks1	224650	15.2729	12.6027	21.8234	14.5591	15.7768	23.2795	6.17986	18.3406
Anks3	72615	26.8744	30.7968	21.7015	27.1221	25.0293	23.3898	12.1971	24.5815
Ankzf1	52231	22.9093	14.644	15.4836	20.6645	21.9451	6.28878	11.384	9.93448
Anln	68743	57.4202	86.089	86.5621	54.9487	70.5803	76.4583	48.1379	76.037
Ano10	102566	12.6295	12.0702	23.1645	16.2028	18.9796	6.61976	4.39096	8.66083
Ano6	105722	14.8323	10.9164	10.7288	15.1461	16.2513	16.2184	16.9133	16.1754
Anp32a	11737	146.414	147.505	162.03	156.04	148.278	132.616	159.375	149.527
Anp32b	67628	1115.51	1210.75	1223.21	1359.51	1031.18	1136.72	1115.63	1024.02
Anp32b-ps1	621961	4.84621	4.61508	5.24249	5.16612	4.38903	3.97186	4.87884	3.69359
Anp32e	66471	471.55	462.396	448.782	500.879	455.272	423.555	468.857	425.654
Antxr1	69538	0	0.532509	2.80412	0	2.01658	0	0.975768	1.65575
Antxr2	71914	19.9722	17.4841	9.75347	15.2635	17.3189	14.5635	10.2456	13.5007
Anxa1	16952	36.5668	33.4593	25.7248	63.285	55.1594	54.944	57.0824	60.7531
Anxa11	11744	2.49653	2.39629	4.02331	2.11341	1.54209	3.30988	2.43942	0.50946
Anxa2	12306	561.572	568.099	548.023	519.195	564.998	527.375	438.933	640.646
Anxa3	11745	394.011	418.907	402.453	499.705	381.964	391.228	459.749	430.239
Anxa4	11746	15.5666	18.7266	20.6042	14.0894	34.1632	19.8593	22.1174	22.0342
Anxa5	11747	203.981	172.267	169.954	202.77	251.123	287.849	282.16	263.518
Anxa6	11749	69.4623	72.155	49.377	63.7546	79.5956	75.5756	58.8713	58.0785
Anxa7	11750	144.211	153.629	107.776	134.554	152.074	123.9	114.49	150.291
Anxa9	71790	2.20282	0.532509	3.90139	1.76118	2.96556	0.110329	5.36672	5.22197
Aoah	27052	34.9514	31.6843	52.1811	21.6038	37.8405	22.8382	21.9548	45.8514
Ap1ar	211556	57.1265	75.3501	54.1318	71.5038	73.19	67.3009	62.4492	49.1629
Ap1b1	11764	78.4204	63.4574	60.8373	47.7866	59.1925	97.7519	61.7986	66.994
Ap1g1	11765	33.336	31.9506	41.4523	37.6892	29.8928	38.174	32.363	32.8602
Ap1g2	11766	16.7414	16.5965	18.6535	19.0207	12.8112	25.0448	7.96877	19.3595
Ap1m1	11767	82.2386	60.9723	77.4182	54.2443	36.5357	77.3409	50.2521	58.7153
Ap1s1	11769	82.0918	70.1137	78.0278	78.3137	53.1428	77.0099	81.4766	89.7924
Ap1s2	108012	74.0148	73.8413	82.9045	89.5852	85.6453	95.5453	104.732	111.444
Ap2a1	11771	14.5386	12.6915	6.46168	10.4497	6.64285	9.26767	5.52935	8.91556
Ap2a2	11772	239.667	246.907	254.931	202.653	299.996	225.734	235.485	291.411
Ap2b1	71770	36.2731	22.3654	18.2878	14.5591	21.5893	33.5401	26.8336	18.0858
Ap2m1	11773	180.631	150.966	149.838	147.117	173.189	190.87	141.812	139.083
Ap2s1	232910	165.212	177.503	143.376	179.875	200.828	213.487	179.216	210.534
Ap3b1	11774	87.966	114.845	100.217	122.108	116.368	115.294	114.49	106.732
Ap3d1	11776	172.848	171.823	186.779	187.389	149.464	175.313	145.715	182.769
Ap3m1	55946	63.0007	72.3325	72.4195	44.2643	52.3124	57.4816	58.3835	66.1025
Ap3m2	64933	8.22386	8.07639	6.82743	4.46165	14.7092	3.64087	10.0829	7.64191
Ap3s1	11777	186.212	164.19	160.201	143.008	158.954	179.506	179.867	166.848
Ap3s2	11778	22.9093	15.7978	15.1179	23.0127	10.676	22.1762	26.671	27.3835
Ap4b1	67489	26.287	18.3716	14.6302	18.9033	7.47321	22.5072	34.6398	21.0152
Ap4e1	108011	8.66443	8.96391	4.75482	12.9153	7.71045	2.64791	8.61929	10.1892
Ap4m1	11781	9.98612	16.6853	15.3617	15.4984	13.6416	16.4391	19.678	17.5764
Ap4s1	11782	51.9866	36.8319	36.6974	48.2563	39.8571	46.228	39.5186	46.3609
Ap5b1	381201	3.81822	3.72757	5.60825	3.05271	3.44005	1.98593	2.9273	0.382095
Ap5m1	74385	13.3638	10.7389	15.1179	21.8386	13.7602	13.2395	10.5708	12.6091
Ap5s1	69596	9.54556	7.81014	9.63155	4.34424	12.0995	7.61273	8.29403	5.22197
Ap5z1	231855	6.46161	8.6089	8.16853	5.04871	6.52423	20.7419	13.3355	5.22197
Apaf1	11783	23.203	22.7204	22.7987	25.4784	35.5867	26.9204	41.958	16.5575
Apba3	57267	9.54556	11.804	12.4357	11.5064	12.3367	7.61273	8.29403	11.3355
Apbb1ip	54519	84.0009	85.2903	101.436	101.796	107.235	117.611	137.095	107.878
Apbb2	11787	6.31475	4.26008	4.51098	4.57906	9.96427	4.63384	2.11416	4.33041
Apbb3	225372	9.83927	20.5016	7.68086	10.4497	5.57525	4.19252	7.96877	4.96724
Apc	11789	11.3078	13.4015	6.94935	14.6765	19.2168	16.5494	16.2628	14.0102
Apeh	235606	57.567	73.4863	60.2277	32.9927	50.0586	33.5401	39.5186	75.7822
Apex1	11792	90.6094	91.6804	86.9278	72.9127	57.176	66.308	64.726	63.8099
Apex2	77622	15.126	24.1404	26.4563	25.7132	23.9617	25.7068	23.0932	17.1943
Aph1a	226548	10.5735	8.96391	9.75347	7.27953	5.10076	6.39911	6.993	9.42502
Aph1b	208117	7.63644	3.10631	1.82878	1.76118	2.25382	5.73713	1.1384	0
Aph1c	68318	8.37072	8.16515	14.2645	8.80589	13.7602	11.2536	13.1729	16.9396
Api5	11800	226.45	189.13	181.537	200.657	171.765	150.379	168.483	131.696
Apip	56369	78.861	68.605	68.5181	82.0709	80.1887	100.289	89.9333	81.0042
Apitd1	69928	30.5458	33.4593	35.6002	32.7579	25.0293	31.6645	35.6155	36.8085
Aplf	72103	24.0842	26.093	27.6755	26.6525	22.7755	20.9626	27.1589	30.3129
Aplp2	11804	35.0983	39.5832	43.8906	54.7139	52.5497	55.7164	59.034	62.1542
Apmap	71881	51.8397	36.9207	58.277	47.1996	18.6237	36.7397	41.1449	43.0494
Apoa1	11806	0.734274	1.06502	0	1.40894	4.86351	0.330988	0.162628	0
Apoa1bp	246703	77.833	60.7061	54.9852	88.6459	97.3889	101.944	53.6672	97.0522
Apobec1	11810	63.4412	57.5998	67.0551	59.88	105.099	78.0029	74.8089	75.2728
Apobec2	11811	17.7694	18.2828	9.87539	17.8466	7.11734	18.8663	11.0587	8.4061
Apobec3	80287	33.9234	36.1219	32.5522	29.0007	46.0255	56.7093	57.8956	47.8893
Apobr	171504	22.3219	30.2643	25.359	25.361	40.6875	34.2021	30.8993	37.1906
Apoc1	11812	0.734274	2.48504	0.73151	3.87459	6.04974	5.84746	4.22833	6.49562
Apoc2	11813	5.58048	2.21879	1.95069	4.10941	4.03316	4.85449	2.60205	3.56622
Apoe	11816	1468.25	1246.16	1375.48	1177.41	2920.72	2968.74	2417.14	3015.11
Apold1	381823	0.881128	3.28381	2.43837	0.704471	4.2704	2.09626	1.30102	3.69359
Apoo	68316	42.441	40.027	40.5988	39.92	29.537	43.1388	44.3975	40.12
Apoo-ps	621156	1.17484	1.33127	1.3411	0.704471	0.593112	1.10329	0.487884	1.78311
Apool	68117	52.1334	73.0425	44.0125	66.2203	73.0713	68.4042	73.6705	77.1832
Apopt1	68020	16.154	16.8628	17.6782	18.0814	13.5229	20.08	20.1659	21.6521
App	11820	42.5879	38.7844	58.277	45.7906	62.514	81.6438	60.335	79.9853
Appbp2	66884	141.715	140.494	127.892	140.072	120.876	114.522	126.199	136.408
Appl1	72993	54.0425	53.1622	50.2304	52.3657	64.2933	56.268	41.6328	55.2764
Appl2	216190	40.0913	42.6008	37.6728	33.5798	40.3316	47.221	42.2833	69.0319
Aprt	11821	406.053	419.085	378.313	425.97	313.044	360.887	367.865	331.404
Aptx	66408	22.3219	18.8153	24.8714	26.8873	30.0114	37.6223	22.7679	27.6382
Aqp11	66333	0.587419	1.50878	1.70686	0.939295	0	2.64791	3.25256	4.20305
Aqr	11834	26.287	35.5006	25.1152	31.2315	19.5727	26.4791	33.1761	29.6761
Araf	11836	21.8814	45.9733	22.1891	28.1788	20.7589	26.2584	37.2418	25.3457
Arap1	69710	22.7625	32.3943	34.381	27.5918	37.7219	39.7186	31.3872	30.1855
Arap2	212285	4.25879	8.78641	6.46168	7.86659	13.9974	9.70899	9.92031	4.07568
Arap3	106952	9.3987	16.064	8.77813	17.1421	8.18494	12.6879	11.2213	7.13245
Arcn1	213827	109.7	71.7113	96.5594	95.4558	109.726	102.937	90.9091	83.1694
Arel1	68497	19.8254	18.9928	23.896	27.7092	30.8418	26.81	16.5881	12.227
Arf1	11840	442.326	404.885	481.578	389.103	357.29	347.648	386.404	383.369
Arf2	11841	73.4274	49.7009	42.5495	36.5151	72.241	61.5638	43.2591	47.1251
Arf3	11842	40.8256	29.288	28.8947	29.0007	21.2334	40.9322	45.8611	46.2335
Arf4	11843	181.512	177.059	219.941	197.722	253.021	188.663	223.451	248.107
Arf5	11844	108.966	117.241	127.039	109.545	139.381	107.571	119.206	133.861
Arf6	11845	321.612	347.906	344.907	300.574	347.682	315.432	277.118	308.988
Arfgap1	228998	68.5811	47.3933	63.0318	40.3897	62.1581	33.2092	35.1277	50.0545
Arfgap2	77038	23.7905	29.1993	22.7987	19.6078	15.5395	30.6716	31.3872	20.5058
Arfgap3	66251	8.66443	6.65637	9.38772	6.69247	12.4553	6.17845	10.7334	2.80203
Arfgef1	211673	37.5948	62.7474	45.8413	49.9	55.1594	67.0803	55.7814	59.0974
Arfgef2	99371	13.2169	14.999	11.0946	16.7899	13.4043	15.2255	16.7507	13.7554
Arfip1	99889	37.8885	30.708	39.3796	53.4224	43.653	52.2961	44.0722	38.3369
Arfip2	76932	27.0213	36.0331	23.1645	37.5718	24.199	29.8993	23.2558	21.5247
Arfrp1	76688	93.1059	82.7165	86.5621	96.2777	84.1032	61.4535	94.1616	68.013
Arg1	11846	3.2308	3.55006	33.0399	3.17012	19.4541	6.50944	0.162628	1.01892
Arglu1	234023	63.0007	91.9466	66.8113	71.5038	104.625	72.4864	71.8816	83.9336
Arhgap1	228359	25.1122	21.3891	36.5755	19.1381	20.9961	32.3265	23.2558	17.7037
Arhgap10	78514	8.37072	12.869	9.2658	9.27553	11.9809	9.26767	10.2456	11.0808
Arhgap11a	228482	74.1616	81.0302	83.7579	72.5605	75.0879	67.7423	93.0232	66.6119
Arhgap12	75415	55.6579	53.1622	60.1058	44.0294	48.8724	64.653	62.4492	59.989
Arhgap15	76117	17.9163	34.5244	26.4563	32.9927	52.3124	58.6952	54.4804	55.7859
Arhgap17	70497	42.8816	42.9558	45.9632	47.904	72.0037	84.9536	68.3038	51.3281
Arhgap18	73910	18.5037	23.5192	31.8207	19.7252	32.6211	45.2351	30.7367	21.3973
Arhgap19	71085	28.7835	27.3355	18.2878	26.4177	30.9604	31.6645	29.7609	50.3092
Arhgap21	71435	4.40564	15.6203	15.3617	18.0814	23.8431	20.3006	15.1244	19.6142
Arhgap23	58996	9.83927	11.2715	9.14388	9.98001	9.84565	7.28174	11.8718	11.0808
Arhgap24	231532	4.84621	5.32509	3.53563	4.10941	2.72831	6.28878	3.25256	8.15137
Arhgap25	232201	59.0356	89.2841	73.8826	77.1396	111.742	126.879	91.2343	117.049
Arhgap26	71302	0.293709	2.13004	0.609592	0.821883	4.98214	1.43428	0.650512	0.50946
Arhgap27	544817	3.96508	5.14759	11.5822	2.23082	16.6071	8.93668	13.6608	7.13245
Arhgap29	214137	4.84621	6.47887	6.58359	1.64377	4.15178	5.29581	4.87884	7.89664
Arhgap30	226652	109.407	106.768	110.702	113.655	150.294	109.888	157.912	143.668
Arhgap31	12549	33.4829	33.5481	28.8947	36.0454	26.9273	37.181	35.7782	29.6761
Arhgap39	223666	17.0351	11.804	13.1672	8.45365	11.3877	15.7771	11.8718	19.9963
Arhgap4	171207	35.8325	15.2653	29.9919	18.1988	21.7079	17.1011	19.3527	30.8224
Arhgap42	71544	2.79024	0	1.58494	0.469647	2.01658	2.97889	7.31826	0
Arhgap44	216831	0.146855	2.21879	3.2918	1.05671	3.44005	0	1.30102	3.31149
Arhgap5	11855	49.7837	62.2149	54.8633	57.1796	42.5854	60.0192	64.2381	64.8288
Arhgap6	11856	2.34968	3.99382	3.77947	2.9353	2.1352	7.83339	2.9273	2.9294
Arhgap9	216445	110.435	104.017	107.776	146.295	137.958	129.196	126.199	122.907
Arhgdia	192662	221.897	185.136	205.676	188.211	181.374	206.316	188.649	154.621
Arhgdib	11857	647.923	531.178	531.077	594.573	625.258	663.521	683.363	644.977
Arhgef1	16801	23.0562	13.224	32.4303	34.2843	29.4183	18.6457	17.0759	28.4024
Arhgef10l	72754	17.182	23.1642	22.1891	14.4417	18.7423	22.2865	22.7679	25.6004
Arhgef11	213498	0.146855	4.34883	1.58494	2.11341	3.55867	1.65494	2.9273	2.67467
Arhgef12	69632	3.37766	0.177503	1.46302	0.469647	1.66071	1.32395	1.95154	3.94832
Arhgef18	102098	6.46161	4.26008	4.51098	5.988	10.2015	6.28878	7.48089	12.3544
Arhgef2	16800	54.1894	44.9083	67.5428	56.8273	62.7512	73.3691	58.8713	74.5086
Arhgef3	71704	34.364	17.6616	20.3604	11.6238	17.0816	15.1151	10.5708	11.2081
Arhgef39	230098	42.8816	52.2747	51.0838	48.3737	41.5178	22.2865	48.1379	38.9737
Arhgef4	226970	3.37766	0.532509	0.487674	0.352235	7.11734	2.97889	5.04147	4.71251
Arhgef40	268739	1.90911	1.77503	0.975347	0.469647	2.1352	2.64791	2.9273	0.764191
Arhgef6	73341	17.182	18.2828	26.5782	18.1988	43.653	37.181	46.5116	41.521
Arhgef7	54126	38.4759	33.9031	39.6235	53.0701	41.7551	37.181	56.2693	48.2714
Arid1a	93760	48.1683	64.9662	59.8619	68.4511	80.4259	72.7071	75.9473	74.6359
Arid1b	239985	12.3358	27.6905	12.9234	18.7859	28.588	29.2373	20.8164	16.6848
Arid2	77044	35.392	35.8556	27.5536	17.7292	30.2487	26.1481	39.356	30.5676
Arid3a	13496	136.428	115.91	128.99	140.19	133.45	129.527	145.552	116.666
Arid3b	56380	7.63644	10.4727	12.3138	6.80989	9.25254	10.371	9.10717	7.00508
Arid4a	238247	64.1755	67.0962	66.0798	77.4918	87.1874	77.2306	71.719	99.2174
Arid4b	94246	55.8048	43.7545	74.0045	55.4184	53.1428	70.8315	68.9543	62.0268
Arid5a	214855	9.98612	6.30136	11.2165	10.4497	5.338	7.83339	11.0587	9.42502
Arid5b	71371	3.2308	6.47887	2.80412	4.57906	6.04974	3.19955	5.52935	10.1892
Arih1	23806	39.0634	47.3046	42.3057	32.5231	53.4987	43.2491	40.3317	30.9497
Arih2	23807	37.8885	58.931	36.0878	50.6045	48.991	41.9252	56.9198	63.8099
Arl1	104303	263.31	250.013	247.007	249.383	261.681	246.366	235.811	258.933
Arl10	56795	8.81128	3.19506	3.65755	4.34424	9.84565	6.28878	10.4082	4.58514
Arl11	219144	24.5247	18.9928	35.3563	24.5391	27.7576	30.2303	26.5084	33.497
Arl13b	68146	16.7414	11.7152	16.3371	22.8953	13.8788	14.6738	21.6295	15.7933
Arl14ep	212772	127.323	171.379	165.199	151.344	159.666	138.353	127.175	175
Arl15	218639	11.8952	8.69765	14.2645	12.6805	15.5395	10.1503	14.9618	15.1564
Arl16	70317	13.3638	18.9041	20.3604	17.1421	16.014	16.3288	11.0587	9.93448
Arl2	56327	43.9096	31.0631	44.5002	43.6772	13.1671	26.1481	24.5568	25.473
Arl2bp	107566	68.1406	74.9951	79.0031	52.9527	67.6147	55.275	54.4804	56.8048
Arl3	56350	23.0562	25.383	23.7741	25.361	19.3354	23.8312	30.7367	24.7088
Arl4a	11861	40.385	29.8205	32.918	52.3657	30.8418	45.4557	45.2106	46.1062
Arl4c	320982	13.2169	21.3891	23.4083	10.6845	25.741	20.5213	15.4497	16.3027
Arl5a	75423	54.1894	68.4275	60.9592	63.4024	60.9719	42.2562	50.2521	60.1163
Arl5b	75869	17.4757	8.2539	5.24249	13.2675	4.50765	9.81932	7.48089	8.66083
Arl5c	217151	6.75532	7.63264	4.51098	10.3322	3.55867	7.94372	9.59505	7.76927
Arl6	56297	12.4826	20.0579	17.922	24.7739	16.014	13.5705	10.8961	8.4061
Arl6ip1	54208	635.293	596.499	655.677	620.639	669.623	615.638	597.333	589.446
Arl6ip4	65105	171.673	181.852	195.801	215.216	211.504	207.971	199.707	191.812
Arl6ip5	65106	61.679	46.5058	47.3043	50.0174	40.213	57.261	50.4147	40.2474
Arl6ip6	65103	59.7699	87.3316	70.4688	96.8648	88.6109	74.8033	84.8918	72.8528
Arl8a	68724	19.6785	20.1466	16.9467	13.3849	22.5382	24.4931	21.4669	16.048
Arl8b	67166	709.896	768.234	699.568	669.952	797.972	797.461	801.756	911.934
Armc1	74252	86.6443	83.5152	110.946	113.185	85.7639	98.8551	70.7432	108.388
Armc10	67211	63.1475	48.6359	60.4715	47.317	55.0408	50.9722	37.7297	46.1062
Armc5	233912	10.7204	8.2539	10.6069	7.27953	12.9298	7.17141	5.52935	6.36825
Armc6	76813	52.574	66.0312	46.329	45.7906	26.69	52.8478	30.5741	45.8514
Armc7	276905	5.87419	6.03511	5.36441	5.75318	5.21938	12.9085	12.685	6.24089
Armc8	74125	33.4829	17.9278	44.2564	35.6932	24.5548	22.6175	38.7055	38.3369
Armc9	78795	3.2308	5.59135	6.46168	5.51836	3.91454	0.882635	1.78891	2.5473
Armcx2	67416	11.161	4.70383	7.07127	7.74918	2.84694	4.19252	6.83038	2.80203
Armcx3	71703	12.7764	11.2715	12.4357	3.992	17.0816	14.0118	12.685	13.3733
Armcx5	494468	1.32169	3.46131	2.07261	3.52235	8.54081	0.992965	0.81314	8.15137
Arnt	11863	14.5386	17.0403	20.4823	14.5591	22.1824	20.3006	21.3043	13.6281
Arntl	11865	0.146855	3.99382	0	2.9353	1.66071	2.53758	5.52935	2.67467
Arpc1a	56443	143.33	183.982	154.471	177.762	166.308	163.619	171.41	182.896
Arpc1b	11867	1320.96	1289.47	1454.73	1340.49	1520.62	1468.37	1422.83	1574.61
Arpc2	76709	917.254	789.09	935.236	819.769	890.616	843.248	844.365	867.738
Arpc3	56378	158.456	86.8878	110.458	89.9375	118.741	161.412	79.8504	143.286
Arpc4	68089	507.236	472.07	427.812	459.785	524.192	494.827	453.732	466.029
Arpc5	67771	603.72	613.007	524.859	506.515	610.193	551.757	642.543	600.654
Arpc5l	74192	176.813	147.594	180.195	203.122	139.974	154.682	163.766	138.828
Arpp19	59046	182.981	191.26	179.952	172.008	175.798	189.656	205.724	162.263
Arrb1	109689	33.336	19.1703	21.0919	24.7739	13.7602	20.9626	21.3043	21.0152
Arrb2	216869	38.4759	32.3056	34.8687	30.1748	32.5025	38.836	34.3145	30.8224
Arrdc1	215705	38.0354	28.7555	40.355	36.2803	43.1785	37.6223	30.5741	24.9636
Arrdc2	70807	3.52451	1.06502	4.87674	2.9353	1.54209	2.31692	3.41519	3.31149
Arrdc3	105171	12.7764	24.0517	26.822	16.4377	14.1161	14.4532	20.3285	23.1804
Arrdc4	66412	21.8814	27.7792	29.5043	20.1948	23.7245	19.5283	21.6295	20.8879
Arsa	11883	8.22386	1.59753	0.243837	1.52635	2.25382	2.53758	1.46365	2.9294
Arsb	11881	2.34968	2.21879	7.3151	2.23082	2.01658	7.17141	2.11416	5.73143
Arsk	77041	2.79024	14.3778	9.38772	1.40894	14.4719	8.60569	5.69198	1.91048
Arv1	68865	4.11193	9.23016	8.90004	6.57506	2.25382	11.4743	7.48089	4.20305
Arxes2	76976	10.7204	20.5016	11.0946	18.1988	8.89667	6.61976	6.34249	11.3355
As3mt	57344	68.1406	63.2799	81.4415	71.269	64.5305	84.9536	78.8746	75.7822
Asah1	11886	496.809	429.291	453.536	436.302	478.641	545.689	516.019	513.791
Asah2	54447	0.587419	4.34883	0	2.23082	1.30485	1.65494	2.27679	2.80203
Asap1	13196	60.9447	67.54	67.5428	58.3537	73.6645	72.9277	91.0717	76.1643
Asb1	65247	13.3638	5.14759	6.70551	9.15812	9.37116	13.4602	5.52935	2.67467
Asb13	142688	3.96508	3.55006	4.6329	3.05271	5.81249	4.41318	0	0.50946
Asb2	65256	7.04903	8.52015	10.485	6.10541	19.4541	5.73713	24.3942	10.6987
Asb3	65257	55.8048	46.2396	44.5002	31.1141	35.8239	42.8078	44.7227	46.3609
Asb4	65255	2.34968	4.97009	7.07127	3.17012	5.21938	0.330988	0.162628	2.9294
Asb6	72323	11.0141	13.4015	16.8247	10.2148	3.2028	14.2325	7.64352	5.98616
Asb7	117589	10.133	8.52015	11.3384	19.7252	12.9298	8.49536	10.2456	18.2132
Asb8	78541	45.2312	29.5543	19.9946	15.1461	40.6875	17.3217	16.2628	11.7176
Ascc1	69090	28.4898	43.3995	34.1372	41.2116	37.7219	31.8852	43.5843	33.497
Ascc2	75452	30.2521	20.4129	24.5056	27.8266	22.7755	29.2373	28.7852	26.6193
Ascc3	77987	23.4968	31.4181	36.5755	49.7826	37.1288	39.1669	33.5014	46.9977
Ascl2	17173	4.99306	7.72139	6.70551	0.939295	3.79591	3.86153	2.11416	6.11352
Asf1a	66403	99.7143	92.3904	76.5648	84.8887	48.7538	69.9488	65.5391	63.5552
Asf1b	66929	118.218	110.496	107.288	113.655	82.4425	113.97	96.9263	114.629
Ash1l	192195	28.7835	41.1807	43.7687	21.7212	48.6351	33.2092	39.1934	42.6673
Ash2l	23808	119.54	101.088	102.533	94.5165	113.403	81.3128	111.238	107.369
Asl	109900	82.8261	96.9167	97.7786	74.4391	83.2729	86.7189	89.9333	76.9285
Asna1	56495	62.5601	44.287	62.0565	51.896	46.8558	56.7093	42.1207	45.0872
Asns	27053	141.715	120.258	114.847	95.1036	75.5624	69.9488	92.8606	91.3208
Asnsd1	70396	254.793	227.293	193.241	245.508	186.118	234.671	192.226	191.812
Aspa	11484	4.11193	5.8576	11.0946	5.51836	6.99872	14.6738	4.39096	3.31149
Asph	65973	98.5395	108.188	118.139	111.659	124.435	102.275	115.303	95.3965
Aspm	12316	55.3642	66.7412	62.1784	90.8768	85.8826	88.2635	104.245	82.7873
Aspscr1	68938	73.7211	43.3108	47.0605	37.924	44.3647	36.519	29.4357	34.5159
Asrgl1	66514	40.6788	39.7607	40.1112	40.1548	44.9579	32.5472	41.958	28.0203
Aste1	66595	9.54556	7.89889	8.77813	4.46165	10.4388	4.52351	5.36672	10.826
Asun	71177	53.602	50.8547	53.0345	58.7059	43.0599	53.6201	40.8196	47.2524
Asxl1	228790	9.69241	14.9103	29.1385	15.3809	17.2002	13.2395	8.61929	12.6091
Asxl2	75302	43.3221	42.2458	50.9619	48.0214	74.6134	50.8619	82.4524	77.3106
Atad1	67979	65.4972	80.4977	53.2783	52.0134	47.4489	60.1295	46.8369	41.7757
Atad2	70472	180.044	212.294	188.974	207.702	207.115	177.41	198.081	218.176
Atad2b	320817	20.2659	15.4428	19.8727	24.1868	22.6569	21.1832	25.5326	37.1906
Atad3a	108888	165.652	149.014	150.569	135.845	117.436	118.714	117.905	103.548
Atad5	237877	33.336	34.7906	43.5249	44.8513	42.9413	35.3054	29.9236	57.1869
Atat1	73242	3.37766	6.74512	4.38906	1.996	4.03316	3.7512	2.27679	2.5473
Ate1	11907	27.9024	30.0868	36.2098	37.924	23.6058	46.89	34.6398	38.9737
Atf1	11908	64.1755	76.6814	61.9345	83.3624	51.7193	68.9559	64.5633	64.7015
Atf2	11909	22.6156	42.157	28.6508	35.4584	43.5344	31.4439	40.0065	41.7757
Atf3	11910	122.917	148.215	132.403	147.821	98.6938	57.1506	68.1411	77.1832
Atf4	11911	96.4835	91.5916	117.651	87.1196	79.7142	73.2587	84.5666	75.9096
Atf5	107503	4.11193	4.52633	4.51098	5.51836	4.86351	4.52351	4.0657	5.0946
Atf6	226641	31.8675	45.3521	42.7934	42.1508	64.6492	43.3595	55.7814	45.5967
Atf6b	12915	25.8464	14.1115	24.3837	15.8506	14.3533	8.82635	15.7749	11.845
Atf7ip	54343	11.4547	10.7389	20.6042	23.7172	15.065	16.4391	21.7922	18.4679
Atf7ip2	75329	0	1.15377	0.975347	1.40894	0.830356	2.31692	1.1384	1.52838
Atg10	66795	18.3568	21.7441	20.1165	21.0167	23.7245	34.3124	36.4287	31.4592
Atg12	67526	38.4759	22.8979	39.6235	34.9887	48.6351	41.9252	54.3178	40.5021
Atg13	51897	8.66443	17.4841	11.7042	12.5631	15.1837	19.087	15.7749	10.1892
Atg14	100504663	4.69935	5.94636	5.73016	9.51036	13.4043	6.95075	6.17986	8.78819
Atg16l1	77040	21.0002	33.5481	38.892	35.2235	30.9604	26.1481	40.4944	33.2423
Atg16l2	73683	19.238	25.2054	10.3631	25.5958	13.6416	17.8734	18.0517	28.0203
Atg2a	329015	13.8043	16.1528	21.0919	9.04071	15.3023	14.1222	9.92031	9.42502
Atg2b	76559	22.3219	19.1703	24.9933	21.7212	26.0969	26.6997	20.8164	12.6091
Atg3	67841	222.044	201.466	210.431	228.249	244.243	209.736	200.032	254.858
Atg4a	666468	27.6087	30.1755	22.433	24.7739	18.2678	30.8922	18.5396	24.3267
Atg4b	66615	36.8605	32.0393	29.2604	25.4784	34.0446	30.5612	33.9893	20.7605
Atg4c	242557	8.22386	3.46131	0.853429	1.64377	5.10076	1.65494	3.41519	4.07568
Atg4d	235040	15.7135	14.8215	8.29045	21.8386	30.9604	15.3358	9.10717	20.5058
Atg5	11793	70.9308	65.8537	73.151	58.4711	65.3609	79.8785	64.726	79.4758
Atg7	74244	35.2451	33.7256	24.1398	34.8713	55.9897	34.3124	36.1034	38.719
Atg9a	245860	5.28677	5.14759	3.2918	5.16612	5.57525	7.94372	7.15563	4.33041
Atg9b	213948	2.05597	1.15377	3.90139	6.10541	0.118622	1.65494	4.0657	0.127365
Athl1	212974	1.90911	2.48504	3.2918	1.64377	0.948978	0.661976	2.11416	1.27365
Atic	108147	116.309	147.328	163.127	142.655	125.384	107.02	124.573	131.186
Atl1	73991	1.32169	0.0887516	0.975347	0	1.18622	2.97889	0	7.00508
Atl2	56298	27.6087	24.9392	21.0919	19.1381	28.7066	26.1481	23.4184	25.2183
Atl3	109168	18.0631	19.1703	13.6549	21.8386	21.4706	24.0518	21.3043	13.7554
Atm	11920	21.7345	17.9278	23.896	25.948	21.1148	24.1621	27.3215	28.7845
Atmin	234776	27.9024	38.1632	32.3084	32.4057	39.7385	33.2092	27.972	32.096
Atox1	11927	62.4132	69.67	61.5688	70.4471	69.9872	80.3198	70.5806	64.192
Atp10a	11982	4.84621	1.59753	8.41237	4.22683	1.30485	2.20659	11.5466	3.94832
Atp10d	231287	4.11193	2.13004	14.2645	5.75318	3.08418	5.51647	5.04147	9.29765
Atp11a	50770	2.93709	6.39011	0.487674	1.64377	4.38903	5.07515	2.43942	5.22197
Atp11b	76295	22.9093	22.2766	19.1412	27.7092	22.7755	24.9344	28.9478	25.0909
Atp11c	320940	14.2449	17.5728	18.6535	15.6158	17.3189	19.418	8.78191	27.6382
Atp13a1	170759	27.0213	36.9207	25.4809	28.0614	21.1148	41.8148	29.4357	32.096
Atp13a2	74772	88.7002	64.5224	80.71	53.4224	85.0522	93.2284	80.3382	85.3346
Atp13a3	224088	34.0703	54.5822	39.3796	37.337	35.5867	35.5261	46.0237	43.3041
Atp1a1	11928	15.2729	13.8452	7.3151	7.04471	17.3189	10.4813	5.69198	11.0808
Atp1b1	11931	1.90911	4.79259	7.9247	3.05271	0.593112	0	0.162628	2.80203
Atp1b3	11933	453.634	433.729	410.621	393.799	397.029	403.144	410.636	384.897
Atp2a2	11938	73.5742	80.4977	93.3895	86.5325	88.6109	90.6908	76.9231	86.9904
Atp2a3	53313	1.6154	3.72757	5.974	7.86659	6.04974	4.85449	3.08993	4.33041
Atp2b1	67972	396.655	474.91	472.678	475.283	607.583	573.492	570.662	682.55
Atp2b4	381290	4.99306	5.94636	4.51098	3.05271	0.355867	1.8756	4.71621	2.80203
Atp2c1	235574	126.736	145.996	122.284	100.035	133.45	150.6	115.141	185.571
Atp5a1	11946	1646.24	1709.62	1678.45	1590.58	1469.14	1464.95	1472.76	1519.72
Atp5b	11947	2106.92	2032.68	2040.67	2177.52	1977.55	1995.97	1906.33	1926.27
Atp5c1	11949	931.646	937.305	906.098	992.482	763.928	958.652	913.156	818.193
Atp5d	66043	310.745	330.333	298.7	325.7	326.33	364.639	309.644	312.299
Atp5e	67126	102.651	100.201	91.5607	108.136	103.913	142.325	113.84	115.775
Atp5f1	11950	1047.96	1025.79	1071.18	1130.09	1010.42	1077.15	1012.68	995.868
Atp5g1	11951	378.151	388.199	373.558	402.135	374.491	382.953	364.775	370.76
Atp5g2	67942	44.0564	50.6772	48.7674	57.1796	51.6007	58.0333	48.1379	54.6396
Atp5g3	228033	876.429	955.411	924.995	1025.94	919.323	1069.53	963.246	945.813
Atp5h	71679	223.953	282.141	242.496	271.221	258.241	309.915	281.997	256.513
Atp5j	11957	313.975	324.21	293.823	345.895	313.875	360.777	344.446	334.461
Atp5j2	57423	238.345	230.222	219.819	247.504	228.229	301.972	265.897	253.711
Atp5k	11958	63.8818	60.4398	55.9605	66.3377	51.9566	69.6179	60.4976	55.4038
Atp5l	27425	9.25185	11.0939	10.7288	7.04471	10.0829	9.378	9.92031	11.9723
Atp5o	28080	412.515	394.856	386.725	430.784	431.904	439.332	383.802	422.47
Atp5s	68055	11.0141	7.98764	5.73016	13.3849	9.37116	8.05405	14.1486	12.7365
Atp5sl	66349	12.4826	16.6853	14.7521	11.976	10.7946	10.702	26.3457	8.66083
Atp6ap1	54411	72.9868	57.6885	64.8606	68.4511	53.7359	80.4301	64.5633	76.037
Atp6ap2	70495	275.793	294.3	260.905	272.043	364.882	338.932	305.415	380.057
Atp6v0a1	11975	16.8883	21.4779	16.3371	17.4944	25.0293	34.0918	20.4911	22.671
Atp6v0a2	21871	12.0421	15.2653	14.7521	5.40094	9.96427	12.9085	5.85461	14.3923
Atp6v0b	114143	306.926	280.632	250.177	306.093	352.071	334.077	280.045	333.824
Atp6v0c	11984	142.89	121.59	125.21	104.966	139.856	147.952	129.615	142.012
Atp6v0d1	11972	144.946	159.398	140.694	140.659	164.529	140.229	156.123	140.611
Atp6v0e	11974	196.785	181.497	191.29	206.41	203.675	177.299	206.05	184.679
Atp6v1a	11964	210.002	186.467	182.146	143.36	199.285	209.516	220.524	238.937
Atp6v1b2	11966	238.051	233.062	269.196	202.418	259.783	260.377	214.181	213.846
Atp6v1c1	66335	215.876	209.187	191.29	189.972	200.946	211.612	230.281	210.789
Atp6v1d	73834	156.547	156.735	170.564	147	155.751	172.886	152.545	167.103
Atp6v1e1	11973	249.506	213.181	217.381	222.378	284.338	235.884	211.091	197.543
Atp6v1f	66144	228.946	229.778	206.53	228.131	261.681	239.304	239.876	242.63
Atp6v1g1	66290	337.472	378.082	311.867	370.552	403.909	355.15	368.027	352.674
Atp6v1h	108664	172.407	202.886	160.567	195.491	162.157	201.241	185.559	225.436
Atp7a	11977	17.3289	11.3602	24.8714	19.373	25.8597	18.2044	16.9133	19.9963
Atp8a1	11980	53.8957	55.026	60.3496	50.7219	89.4412	75.9066	88.307	73.4897
Atp8a2	50769	0	2.04129	3.65755	1.17412	3.32142	0.110329	1.1384	5.85879
Atp8b2	54667	1.90911	2.48504	2.56029	2.58306	1.54209	1.21362	3.08993	1.78311
Atp8b4	241633	21.1471	17.7503	34.381	24.6565	20.6403	15.5564	16.2628	10.826
Atp9b	50771	16.3009	22.3654	11.2165	15.7332	17.912	19.6386	19.5154	16.8122
Atpaf1	230649	48.4621	40.027	42.5495	31.4664	30.3673	31.8852	42.7712	48.5261
Atpaf2	246782	48.3152	50.8547	62.4222	58.5885	41.5178	50.6412	35.9408	45.2146
Atpif1	11983	370.661	365.479	335.032	386.52	348.156	407.557	388.844	390.247
Atr	245000	23.6436	22.8979	7.80278	21.0167	13.9974	19.5283	20.4911	17.0669
Atraid	381629	69.4623	55.5585	58.0332	60.8193	65.7168	75.7963	91.2343	68.7771
Atrip	235610	16.7414	16.9516	14.6302	9.39295	16.3699	18.9767	13.6608	18.4679
Atrn	11990	7.04903	11.0939	21.0919	6.22283	25.6224	8.27471	12.0345	26.6193
Atrnl1	226255	6.90217	4.97009	3.2918	11.6238	3.91454	9.26767	12.5224	7.89664
Atrx	22589	200.457	176.083	231.767	201.479	280.423	238.312	276.63	286.062
Atxn1	20238	23.4968	32.6606	26.7001	44.0294	65.1236	36.519	31.3872	38.4643
Atxn10	54138	378.004	384.117	324.669	359.632	280.067	302.303	321.678	340.829
Atxn1l	52335	10.133	25.1167	19.5069	22.6605	22.301	20.6316	25.8579	32.3507
Atxn2	20239	19.3848	22.8979	24.8714	20.1948	25.741	29.8993	16.7507	25.6004
Atxn2l	233871	4.69935	4.88134	4.51098	8.21883	5.21938	4.96482	8.1314	1.91048
Atxn3	110616	47.8746	58.7535	54.8633	58.9407	54.8035	64.4324	45.8611	68.1403
Atxn7	246103	1.32169	4.34883	3.41372	5.28353	20.0472	10.1503	11.0587	5.85879
Atxn7l1	380753	16.5946	22.4541	20.97	16.3202	21.5893	25.5964	22.7679	24.7088
Atxn7l3	217218	7.04903	10.1177	5.60825	14.5591	11.5064	9.59866	11.7092	5.98616
Atxn7l3b	382423	77.5393	78.0126	107.654	87.3544	91.4578	81.7541	92.2101	70.9424
Auh	11992	38.7696	29.3768	47.6701	44.6165	49.7027	41.2632	40.657	32.2234
Aup1	11993	133.638	92.1241	98.1443	93.6946	106.404	92.3457	107.009	83.2968
Aurka	20878	201.338	210.785	188.364	163.789	146.973	132.506	152.708	121.252
Aurkaip1	66077	213.967	204.75	204.579	208.641	162.987	180.72	181.981	181.877
Aurkb	20877	180.338	194.721	195.923	199.6	156.344	176.858	163.604	167.612
Auts2	319974	7.7833	6.21261	6.09592	4.57906	2.72831	2.42725	3.57782	8.024
Aven	74268	14.6855	23.1642	25.6029	22.1908	15.7768	18.756	14.9618	17.449
Avl9	78937	9.10499	13.0465	7.19319	9.51036	13.8788	4.96482	4.22833	7.13245
Avpi1	69534	12.3358	4.70383	12.1918	8.80589	10.7946	5.07515	5.36672	6.49562
Axin1	12005	15.7135	16.2415	19.8727	34.5191	18.9796	28.5753	30.7367	28.0203
Axl	26362	1.32169	2.84005	0.73151	1.05671	0.237245	1.32395	3.57782	0
Azi2	27215	76.9519	71.9775	89.1224	68.4511	107.353	74.362	89.7707	82.1505
Azin1	54375	204.569	254.717	249.079	226.135	213.639	178.292	168.157	168.886
B020018G12Rik	545388	1.90911	1.59753	1.21918	0.821883	0.474489	0.772306	1.46365	1.52838
B130006D01Rik	320616	1.46855	0.887516	1.70686	1.76118	1.66071	6.39911	0.81314	6.87771
B130046B21Rik	100049164	4.69935	7.27763	4.75482	7.74918	6.16836	5.51647	7.96877	8.024
B130055M24Rik	654803	2.34968	0.798764	4.99865	2.11341	0.948978	0.330988	1.30102	2.29257
B230118H07Rik	68170	21.0002	33.6368	30.3577	33.6972	38.6709	34.2021	37.5671	37.318
B230216N24Rik	78603	3.96508	3.55006	5.85208	6.69247	12.4553	12.3569	8.94454	11.4629
B230217C12Rik	68127	1.02798	2.30754	4.38906	0.234824	0	0.110329	1.62628	2.9294
B230219D22Rik	78521	26.1401	42.157	43.1591	52.1308	41.7551	25.2654	35.2903	36.6811
B230307C23Rik	245305	7.04903	4.52633	7.68086	9.62777	12.2181	13.3499	14.6365	10.5713
B230312C02Rik	320485	2.79024	5.41385	2.31645	4.57906	0.593112	1.32395	1.95154	4.33041
B230325K18Rik	319527	8.22386	8.4314	8.04661	10.8019	6.99872	4.41318	6.66775	4.07568
B230354K17Rik	320063	10.2798	7.18888	8.41237	5.04871	3.32142	6.28878	6.17986	1.27365
B230369F24Rik	320110	4.40564	3.37256	5.85208	6.34024	2.1352	4.19252	4.22833	2.80203
B2m	12010	674.651	818.023	548.755	623.692	808.411	778.705	745.975	759.733
B3galnt1	26879	7.63644	3.19506	7.55894	1.29153	20.8775	13.6808	9.2698	12.4818
B3galnt2	97884	15.4197	17.7503	17.0686	19.8426	9.13392	30.7819	26.5084	26.6193
B3galt2	26878	0.881128	0.532509	4.38906	0.469647	0.830356	3.30988	2.11416	1.27365
B3galt4	54218	6.46161	4.52633	0.243837	3.40494	3.91454	0.992965	3.90307	4.58514
B3galt6	117592	30.3989	32.7493	29.3823	42.1508	12.574	27.141	41.1449	22.0342
B3gat3	72727	25.4059	27.7792	27.5536	28.4137	23.6058	36.9604	20.0032	29.1666
B3gnt1	108902	16.7414	23.2529	19.7508	22.1908	24.5548	31.8852	32.6882	14.647
B3gnt2	53625	0.440564	0.887516	1.46302	0.939295	1.0676	1.54461	2.27679	0.891556
B3gnt3	72297	0	2.39629	3.53563	1.64377	1.30485	2.20659	0	2.41994
B3gnt7	227327	8.95814	8.69765	5.60825	2.58306	5.69387	2.09626	2.27679	4.33041
B3gnt8	232984	4.69935	3.28381	6.33976	1.40894	11.3877	5.95779	4.87884	3.31149
B3gntl1	210004	6.1679	5.23634	0.73151	6.69247	3.55867	8.38504	4.0657	3.18413
B430010I23Rik	78849	4.99306	7.10013	5.36441	10.8019	9.84565	6.06812	16.2628	9.17029
B430212C06Rik	338360	2.34968	1.24252	0.243837	0	0.711734	1.32395	1.1384	1.65575
B430306N03Rik	320148	6.90217	4.70383	4.87674	5.87059	15.4209	10.9226	17.2386	10.4439
B4galnt1	14421	5.28677	4.70383	6.21784	9.74518	6.52423	3.42021	5.85461	3.69359
B4galt1	14595	268.01	304.684	273.097	254.901	337.836	260.157	282.485	300.709
B4galt3	57370	36.5668	26.3592	33.8933	29.1181	16.014	25.0448	18.5396	16.5575
B4galt4	56375	11.161	12.9577	20.7261	10.4497	10.9133	16.5494	18.0517	12.3544
B4galt5	56336	79.5952	78.3676	87.2936	77.257	112.928	62.2258	93.5111	90.0471
B4galt6	56386	11.7484	19.4366	21.8234	24.8913	30.2487	32.2162	34.4771	36.5538
B4galt7	218271	20.2659	18.1053	23.6522	24.4217	9.13392	30.0096	15.4497	27.7656
B630005N14Rik	101148	9.3987	11.9815	13.8987	10.0974	16.6071	16.9907	19.5154	13.5007
B930036N10Rik	100048917	3.2308	3.10631	1.3411	2.23082	2.37245	2.31692	0.487884	1.14629
B930095G15Rik	320268	3.81822	8.34265	4.99865	11.6238	2.49107	4.96482	4.22833	6.24089
B9d1	27078	4.25879	6.56762	3.77947	3.52235	5.21938	7.83339	4.0657	9.55238
B9d2	232987	35.8325	33.4593	22.5549	37.6892	25.1479	30.8922	30.2488	27.893
BC002059	213811	6.1679	5.41385	12.1918	7.51436	11.0319	8.82635	14.1486	11.845
BC002163	170658	6.1679	5.32509	4.75482	5.28353	5.45663	4.08219	5.69198	5.34933
BC003331	226499	37.4479	39.4945	44.7441	35.341	67.3775	63.5497	69.7674	59.7342
BC003965	214489	70.0497	68.605	64.3729	66.3377	50.5331	72.0451	63.9128	50.1818
BC004004	80748	99.5675	109.874	108.385	105.905	114.945	130.078	110.587	112.209
BC005537	79555	138.043	146.174	142.035	159.328	238.312	202.785	160.514	209.388
BC005561	100042165	19.8254	14.0227	12.9234	11.5064	12.6926	19.8593	9.2698	15.1564
BC005624	227707	59.0356	61.8598	60.4715	61.0541	61.4464	52.6271	48.951	46.8704
BC017158	233913	28.9304	23.6967	12.3138	19.4904	28.8252	27.141	13.3355	18.9774
BC017643	217370	111.022	127.891	104.484	107.784	111.505	82.6367	109.774	89.4103
BC022960	237246	1.02798	0	1.70686	0	1.42347	1.32395	0	0
BC023829	236848	50.2243	15.1765	29.6262	18.1988	25.6224	27.0307	43.5843	23.9446
BC024978	414069	11.4547	12.4252	8.77813	8.80589	14.3533	8.82635	6.993	7.25981
BC026585	226527	8.51757	16.9516	5.73016	6.22283	14.4719	9.59866	10.5708	8.024
BC027231	212547	22.1751	20.3241	30.7234	27.944	16.3699	17.9837	14.7992	21.6521
BC028528	229600	10.4267	8.96391	14.2645	16.0854	13.8788	15.0048	10.8961	12.4818
BC029214	227622	7.34274	4.79259	5.60825	3.992	9.48978	4.74416	7.48089	2.67467
BC029722	613262	7.7833	3.72757	5.12057	4.22683	5.21938	6.84042	9.10717	2.16521
BC030336	233812	9.83927	11.3602	11.8261	13.0327	9.25254	11.4743	12.3597	10.3166
BC030867	217216	13.8043	7.10013	13.1672	4.34424	11.0319	6.39911	6.34249	2.80203
BC031181	407819	100.742	106.236	65.5921	92.9902	91.1019	62.8878	80.1756	91.4481
BC033916	474160	4.25879	6.74512	8.16853	3.17012	5.57525	2.75824	6.50512	5.0946
BC035044	232406	190.177	205.016	242.496	224.139	171.646	174.872	213.693	207.732
BC037032	414066	0.293709	0.355006	2.07261	1.05671	1.66071	0.661976	0.487884	1.40102
BC037034	231807	3.2308	1.95253	1.70686	4.57906	2.60969	1.98593	1.1384	1.40102
BC046401	394191	1.6154	2.13004	1.82878	2.34824	1.0676	3.53054	1.95154	3.43886
BC048403	270802	0.881128	1.59753	0.487674	0.704471	1.77933	1.21362	0.162628	1.91048
BC049352	408059	1.6154	1.68628	1.95069	4.46165	8.06632	4.74416	7.80615	3.82095
BC049715	320135	0.587419	2.5738	3.04796	0.939295	0.593112	4.08219	1.46365	2.16521
BC049762	193286	1.6154	0.355006	0.73151	0	1.30485	3.08922	0.650512	2.41994
BC052040	399568	1.32169	6.03511	7.43702	5.87059	0.948978	2.20659	1.95154	2.41994
BC055324	381306	35.0983	26.7142	27.1878	25.361	21.4706	17.763	25.5326	13.7554
BC065397	436230	1.6154	1.68628	4.26714	2.11341	0.948978	3.30988	0.162628	1.01892
BC068281	238037	3.08395	6.65637	2.56029	3.05271	4.98214	3.53054	9.59505	2.16521
BC100530	100034684	1.17484	0.710013	0.121918	1.52635	0.948978	1.10329	2.11416	0
BC147527	625360	1.90911	0.976267	1.58494	3.40494	2.01658	2.64791	5.69198	7.51454
Babam1	68251	60.3573	53.5172	53.4003	74.2043	63.8188	53.9511	63.2623	73.1076
Bace1	23821	9.69241	10.3839	13.7768	6.9273	20.2844	10.5916	12.3597	21.1426
Bach1	12013	61.5321	63.8124	65.4702	60.2323	71.5293	78.6649	73.6705	92.7218
Bach2	12014	3.81822	5.41385	3.2918	3.52235	3.79591	4.30285	4.39096	2.03784
Bad	12015	49.0495	37.7194	43.5249	43.912	55.0408	42.3665	39.356	43.1768
Bag1	12017	288.129	313.471	326.619	297.991	303.554	293.035	315.986	281.986
Bag2	213539	82.8261	73.0425	80.2223	86.7673	49.8214	59.0262	49.9268	36.4264
Bag3	29810	11.4547	11.3602	21.8234	16.9073	12.3367	19.5283	17.7265	12.0997
Bag4	67384	20.7065	11.6265	15.8494	16.9073	9.25254	8.93668	11.7092	14.5196
Bag5	70369	49.49	45.6183	44.5002	42.9727	55.1594	42.5872	47.1621	55.5312
Bag6	224727	19.238	16.3303	20.4823	21.7212	25.741	23.2795	22.9306	15.1564
Bahcc1	268515	2.93709	5.94636	0.365755	4.57906	6.99872	4.52351	4.55358	1.27365
Bahd1	228536	12.3358	14.999	16.7028	15.7332	15.5395	18.425	8.61929	12.7365
Baiap2	108100	15.7135	8.96391	7.80278	18.1988	8.30356	10.371	7.15563	12.8639
Baiap2l1	66898	3.08395	2.13004	1.46302	2.81788	8.18494	7.28174	2.11416	7.13245
Bak1	12018	6.60846	5.5026	4.87674	6.34024	2.84694	3.86153	4.87884	2.67467
Bambi	68010	11.7484	18.8153	8.65621	20.7819	15.1837	18.6457	21.6295	20.7605
Banf1	23825	326.605	312.938	284.07	287.072	229.771	262.915	250.285	246.834
Bank1	242248	51.6929	48.3696	55.4729	52.3657	68.4451	61.3432	69.1169	76.6738
Banp	53325	33.7766	15.4428	14.5083	18.6685	8.89667	13.9015	10.7334	14.0102
Bap1	104416	46.5529	37.8969	52.6688	25.4784	62.9884	29.5683	33.664	40.6295
Bard1	12021	53.1614	60.0848	37.9166	49.6652	49.4655	36.519	46.9995	57.3143
Basp1	70350	13.9512	13.934	8.77813	12.3282	15.065	16.2184	14.1486	19.9963
Batf	53314	28.9304	36.3881	30.6015	38.7459	44.9579	49.7586	40.3317	51.7102
Batf3	381319	16.3009	12.3365	10.3631	14.5591	13.5229	12.5776	9.10717	15.2838
Bax	12028	166.827	170.669	164.59	172.948	161.445	161.853	158.725	172.962
Baz1a	217578	74.1616	69.2262	83.1484	80.7793	73.6645	79.4372	61.7986	88.264
Baz1b	22385	137.309	178.391	186.047	155.688	203.2	184.802	192.552	197.161
Baz2a	116848	16.8883	24.7617	20.97	24.4217	19.6913	23.7208	21.1416	30.9497
Baz2b	407823	44.6438	27.513	48.1578	36.8673	43.8903	44.5731	43.7469	40.5021
Bbc3	170770	12.1889	19.9691	16.7028	19.0207	12.8112	13.6808	10.7334	11.2081
Bbip1	100503572	52.8677	47.2158	43.1591	56.9447	48.042	45.897	47.4874	47.2524
Bbs10	71769	0.440564	2.13004	2.19453	1.996	8.65943	0	1.30102	1.91048
Bbs12	241950	1.6154	9.94018	2.43837	19.2555	0	14.2325	10.4082	6.36825
Bbs2	67378	2.64338	3.37256	1.3411	0.821883	1.66071	1.8756	3.74044	1.01892
Bbs4	102774	4.69935	9.05266	9.38772	14.6765	11.9809	8.93668	5.69198	4.45778
Bbs5	72569	7.34274	4.34883	13.0453	16.5551	14.2347	6.50944	12.685	16.3027
Bbs7	71492	9.3987	7.45513	7.9247	17.2595	9.72703	17.9837	16.1002	4.45778
Bbs9	319845	2.79024	0.798764	4.87674	2.11341	2.01658	2.86856	4.55358	0.50946
Bbx	70508	61.8258	72.7763	64.3729	70.4471	70.5803	67.0803	59.034	73.8718
Bcap29	12033	170.792	153.451	147.765	141.833	149.227	129.968	139.047	136.917
Bcap31	27061	164.918	169.604	161.176	173.417	154.09	168.032	157.912	148.762
Bcas2	68183	224.541	241.316	218.722	213.455	213.046	228.161	231.745	228.493
Bcas3	192197	3.96508	4.52633	3.2918	3.17012	2.1352	3.19955	2.60205	5.73143
Bcat1	12035	30.2521	31.5956	20.6042	21.8386	5.57525	7.61273	12.8476	5.34933
Bcat2	12036	46.9935	32.3056	44.866	48.0214	52.7869	40.8219	36.1034	47.5072
Bccip	66165	82.6792	82.2727	88.147	99.3304	77.8162	91.0218	85.8676	84.061
Bcdin3d	75284	8.37072	7.27763	7.3151	8.10142	7.82907	5.73713	5.2041	13.5007
Bckdha	12039	6.02104	10.3839	10.8507	7.04471	11.0319	14.1222	19.5154	19.4869
Bckdhb	12040	11.3078	8.78641	11.8261	11.5064	5.45663	11.3639	11.2213	8.53346
Bckdk	12041	67.5532	30.2643	46.5728	40.2723	23.3686	23.9415	58.0582	33.7517
Bcl10	12042	75.9239	91.2366	82.2949	80.4271	80.7818	67.8526	48.4632	80.24
Bcl11a	14025	1.17484	2.13004	5.12057	7.04471	10.4388	2.64791	7.31826	2.5473
Bcl2	12043	2.34968	4.08257	6.09592	4.69647	7.82907	1.43428	6.50512	1.78311
Bcl2a1a	12044	2.64338	6.21261	5.12057	1.76118	3.91454	2.20659	3.74044	5.98616
Bcl2a1b	12045	16.0072	13.7565	22.7987	9.04071	8.77805	15.0048	16.2628	14.7744
Bcl2a1d	12047	2.49653	10.5614	7.43702	2.9353	5.81249	4.96482	3.74044	7.64191
Bcl2l1	12048	15.4197	11.3602	23.6522	11.3889	22.4196	15.6668	27.1589	23.0531
Bcl2l11	12125	22.4688	14.999	37.9166	28.7659	32.3839	40.0496	33.9893	43.8136
Bcl2l12	75736	6.31475	8.6089	15.3617	10.8019	17.7933	15.4461	10.8961	14.3923
Bcl2l13	94044	14.5386	29.998	32.3084	22.6605	35.9426	23.5002	22.28	22.5436
Bcl2l2	12050	3.96508	2.21879	3.77947	0.821883	0.711734	3.08922	2.60205	3.05676
Bcl3	12051	7.34274	1.59753	7.80278	4.9313	0.830356	3.7512	4.0657	6.75035
Bcl6	12053	7.34274	2.9288	10.7288	2.11341	1.18622	1.98593	2.76468	5.4767
Bcl7a	77045	3.67137	5.23634	3.41372	3.52235	1.42347	9.15734	3.74044	5.60406
Bcl7b	12054	28.4898	45.7958	34.0152	26.1828	30.8418	37.2913	33.0135	32.096
Bcl7c	12055	18.9443	16.774	22.433	17.3769	23.0127	15.1151	22.6053	17.7037
Bcl9	77578	4.84621	10.6502	6.70551	5.988	7.23596	6.28878	5.85461	7.38718
Bcl9l	80288	0.440564	2.66255	1.82878	0.939295	0.711734	1.43428	1.95154	3.18413
Bclaf1	72567	421.179	411.541	477.311	467.299	481.013	430.616	528.216	508.951
Bco2	170752	6.46161	6.47887	7.3151	3.75718	14.7092	14.6738	7.96877	13.3733
Bcor	71458	11.6015	14.0227	2.80412	7.51436	8.54081	15.3358	6.83038	13.6281
Bcorl1	320376	0.293709	0.355006	4.51098	4.10941	3.08418	0.772306	1.30102	1.78311
Bcr	110279	1.02798	2.04129	0.365755	0.939295	1.89796	3.7512	1.1384	1.27365
Bcs1l	66821	46.5529	45.3521	36.9413	54.7139	33.0956	35.7467	34.1519	33.1149
Bdp1	544971	51.546	53.1622	66.8113	81.1316	53.2614	57.8126	71.5563	55.0217
Becn1	56208	98.9801	118.572	117.895	80.0749	84.2218	98.0828	89.2828	75.2728
Bend3	331623	2.34968	0.355006	0.365755	2.23082	1.89796	1.21362	0.487884	0.636825
Bend4	666938	323.668	304.507	279.193	398.848	275.441	231.581	273.866	203.912
Best1	24115	4.5525	1.95253	1.46302	3.17012	4.03316	2.09626	6.50512	6.24089
Bet1	12068	45.2312	35.0569	43.1591	54.3617	78.6466	60.5708	59.6845	66.3572
Bet1l	54399	10.7204	11.0052	23.1645	10.4497	16.6071	12.7982	16.5881	23.0531
Bex1	19716	10.5735	13.3127	9.2658	12.2108	6.76147	8.82635	9.10717	8.024
Bex2	12069	3.37766	6.30136	5.12057	2.70047	1.54209	0.551647	4.55358	1.01892
Bex4	406217	18.6505	12.0702	16.9467	13.972	7.11734	6.61976	5.2041	5.0946
Bex6	328660	7.7833	8.87516	7.68086	5.16612	4.2704	5.84746	6.01724	9.80711
Bfar	67118	69.6091	68.4275	66.0798	52.0134	89.4412	59.9089	72.8574	30.8224
Bhlhb9	70237	52.4271	61.1498	73.0291	75.6132	48.042	58.3643	42.7712	55.7859
Bhlhe41	79362	6.90217	12.2477	6.46168	6.45765	15.7768	9.70899	15.1244	6.75035
Bicd2	76895	39.9445	27.3355	36.0878	33.6972	32.1466	29.458	22.28	39.7379
Bid	12122	156.694	133.127	125.82	147.117	120.758	126.989	132.867	132.969
Bin1	30948	58.3013	73.0425	90.5854	80.0749	80.7818	78.0029	66.8401	92.4671
Bin2	668218	248.625	230.31	213.967	212.046	199.997	249.013	217.434	245.56
Bin3	57784	89.4345	67.4512	69.6154	82.4231	67.1402	115.515	68.4664	90.6839
Birc2	11797	14.0981	14.2003	20.3604	12.7979	26.2155	15.5564	8.1314	19.4869
Birc3	11796	11.6015	16.064	15.4836	15.2635	22.301	15.4461	11.0587	25.9825
Birc5	11799	466.851	472.158	416.108	458.845	423.719	494.165	416.978	433.805
Birc6	12211	159.778	172.444	192.143	196.547	204.505	182.154	207.188	186.845
Bivm	246229	28.343	27.6905	19.1412	19.96	26.8086	17.763	26.9963	15.9206
Blcap	53619	4.99306	5.41385	6.94935	7.39694	11.5064	6.39911	6.34249	4.45778
Blm	12144	38.3291	26.6255	32.4303	47.1996	32.1466	37.6223	37.5671	33.1149
Blmh	104184	361.409	402.932	351.491	371.961	314.824	386.925	356.318	326.182
Blnk	17060	3.08395	2.13004	0.121918	4.22683	0.237245	4.30285	0.325256	1.65575
Bloc1s1	14533	14.5386	13.934	14.0206	16.2028	21.2334	21.4039	20.3285	16.5575
Bloc1s2	73689	55.0705	52.1859	62.0565	54.7139	60.4974	64.1014	47.4874	54.6396
Bloc1s3	232946	2.93709	0.266255	2.80412	1.87859	2.25382	1.98593	0.162628	1.14629
Bloc1s4	117197	36.7137	44.0208	29.7481	43.912	41.2806	34.3124	51.3905	39.2284
Bloc1s5	17828	35.6857	24.2292	47.5482	33.6972	38.4336	33.3195	31.5498	55.5312
Bloc1s6	18457	12.9232	13.934	18.7754	26.3002	15.065	12.4672	21.4669	8.91556
Blvra	109778	132.757	134.725	123.625	108.606	195.371	201.02	146.365	167.867
Blvrb	233016	41.413	35.6781	33.6495	36.7499	75.3252	72.8174	67.1654	96.288
Blzf1	66352	22.3219	20.9454	17.3124	35.2235	20.0472	24.6035	19.0275	23.9446
Bmi1	12151	11.3078	11.449	10.3631	17.964	4.86351	11.3639	6.993	13.6281
Bmp2k	140780	126.295	152.386	101.558	123.752	216.367	152.696	179.216	190.666
Bmpr1a	12166	18.5037	29.643	27.9193	29.8226	39.0267	48.9863	46.1864	44.8325
Bmpr2	12168	2.79024	3.99382	14.2645	10.9193	8.77805	12.9085	20.0032	17.9585
Bms1	213895	96.3367	101.354	110.58	116.355	71.0548	86.8292	96.601	72.5981
Bmyc	107771	14.0981	7.98764	11.4603	9.15812	10.3201	6.61976	12.1971	8.53346
Bnip1	224630	35.5388	40.5595	37.6728	45.6732	41.7551	29.127	41.7954	49.1629
Bnip2	12175	243.045	246.463	241.155	247.152	231.195	251.992	267.198	260.334
Bnip3	12176	117.631	117.418	121.431	106.727	85.6453	94.9936	73.3452	90.1745
Bnip3l	12177	72.2525	53.6947	71.9319	73.1476	81.7308	76.8996	68.1411	80.6221
Bod1	69556	12.7764	23.7854	19.1412	17.0247	11.3877	16.6597	12.5224	14.2649
Bod1l	665775	60.5041	89.2841	111.433	100.387	113.047	112.867	89.9333	146.597
Bola1	69168	40.0913	34.7019	27.1878	30.8793	32.5025	35.3054	29.1104	27.6382
Bola2	66162	66.3783	74.9951	64.4948	74.4391	72.4782	75.024	64.4007	61.6447
Bola3	78653	57.8608	55.6472	61.4469	66.4551	46.8558	61.0122	58.7087	52.2197
Bop1	12181	91.3436	56.8898	66.9332	64.4591	34.1632	40.1599	52.3662	39.7379
Bora	77744	55.2174	38.0744	59.2523	60.7019	32.2653	47.1107	28.9478	28.5298
Bpgm	12183	24.5247	18.7266	18.1658	14.7939	22.1824	15.3358	21.1416	20.7605
Bphl	68021	46.5529	34.0806	49.377	40.7419	48.5165	43.9111	41.3075	47.3798
Bpnt1	23827	72.6931	75.1726	88.0251	66.5725	55.3966	67.4113	60.335	54.767
Bptf	207165	60.9447	56.446	70.7127	83.0102	88.8481	80.6508	65.8643	106.095
Braf	109880	69.1686	60.4398	51.2057	69.6252	62.3953	55.3854	73.1826	48.9082
Brap	72399	28.343	30.4418	21.7015	35.2235	34.2818	21.0729	27.972	31.7139
Brat1	231841	7.34274	3.46131	6.09592	8.45365	5.10076	5.6268	5.04147	2.67467
Brca1	12189	13.0701	25.4717	19.2631	29.7052	18.9796	15.4461	26.8336	40.8842
Brca2	12190	23.7905	32.4831	24.1398	32.5231	48.3979	30.1199	49.9268	51.2008
Brcc3	210766	120.274	148.304	133.744	169.073	111.386	128.865	151.244	111.062
Brd1	223770	57.1265	75.3501	61.0811	69.9774	94.3047	74.362	81.1514	86.3535
Brd2	14312	91.7842	83.4265	69.7373	64.9287	79.7142	81.2024	65.5391	76.9285
Brd3	67382	51.8397	37.9857	57.5455	52.0134	58.3622	51.8548	55.6188	59.8616
Brd4	57261	109.847	124.696	124.113	125.278	107.709	133.83	132.704	120.869
Brd7	26992	130.848	185.491	196.167	177.174	171.409	188.001	161.978	181.623
Brd8	78656	136.428	119.815	136.671	129.623	141.398	119.156	123.923	142.522
Brd9	105246	40.8256	28.4005	47.6701	45.908	50.7703	44.1318	43.2591	39.3558
Bre	107976	42.441	31.8618	35.2344	29.5878	29.537	29.0166	51.0652	30.4403
Brf1	72308	25.9933	30.5305	29.9919	16.0854	35.5867	34.5331	39.0307	20.7605
Brf2	66653	6.60846	5.32509	7.3151	9.51036	2.1352	5.07515	7.64352	5.0946
Bri3	55950	45.3781	41.447	41.4523	36.6325	47.5675	56.93	42.7712	51.5829
Bri3bp	76809	205.156	175.462	194.216	197.369	119.571	129.747	149.293	111.062
Brip1	237911	33.336	45.5296	48.8893	24.3042	47.5675	44.4628	45.5358	55.7859
Brix1	67832	205.156	217.441	206.53	196.665	172.358	179.506	183.119	188.246
Brk1	101314	194.436	190.638	179.83	197.369	198.455	259.053	204.586	202.638
Brms1	107392	58.595	57.511	55.8386	62.5805	71.292	71.3831	45.8611	56.168
Brms1l	52592	6.1679	24.7617	20.1165	16.5551	12.4553	19.087	14.3113	24.5815
Brox	71678	20.5597	27.0692	24.8714	27.8266	18.8609	39.9392	33.1761	33.497
Brpf1	78783	19.238	18.2828	20.848	27.2395	26.8086	30.5612	28.1346	31.3318
Brpf3	268936	1.32169	0.355006	1.09727	1.40894	0	2.20659	2.27679	1.01892
Brwd1	93871	43.3221	56.801	75.1017	74.0869	65.005	74.031	60.335	56.9322
Brwd3	382236	28.4898	39.5832	22.7987	31.8186	53.4987	23.2795	33.1761	32.2234
Bscl2	14705	57.4202	46.5058	47.3043	39.5678	54.8035	73.0381	57.5703	57.569
Bsdc1	100383	7.63644	8.87516	7.68086	5.87059	12.0995	13.2395	8.45666	15.2838
Bsg	12215	370.221	352.433	322.84	349.065	322.653	327.458	281.184	257.914
Bsn	12217	0.734274	1.59753	7.07127	2.46565	3.55867	0.661976	4.0657	3.18413
Bst1	12182	2.93709	0.177503	8.90004	2.23082	2.37245	2.86856	3.08993	4.71251
Bst2	69550	97.8052	111.206	95.7059	87.7066	130.84	110.991	103.919	128.511
Btaf1	107182	53.4551	70.6463	76.9305	105.788	109.488	92.6767	116.93	100.491
Btbd1	83962	69.6091	129.134	116.676	88.4111	115.538	89.0358	76.4352	141.375
Btbd10	68815	31.1332	45.1746	48.0359	50.1348	51.4821	45.1247	41.6328	55.6585
Btbd19	78611	4.11193	2.7513	0.853429	2.70047	2.84694	0.551647	1.78891	3.05676
Btbd2	208198	8.81128	5.94636	1.95069	9.27553	4.86351	7.5024	7.80615	6.24089
Btbd3	228662	1.46855	3.90507	3.41372	3.17012	0.355867	3.86153	2.27679	2.5473
Btbd6	399566	3.81822	8.6089	4.87674	5.63577	1.42347	4.52351	1.1384	4.45778
Btbd7	238386	12.1889	7.72139	9.02196	6.34024	10.2015	6.06812	5.85461	7.76927
Btbd8	100503185	0.440564	1.42003	1.3411	1.40894	1.77933	0.441318	2.11416	2.67467
Btbd9	224671	37.7417	21.3004	48.1578	49.313	37.4846	44.5731	40.0065	30.5676
Btd	26363	6.31475	16.5078	5.85208	8.57106	14.1161	6.06812	11.7092	10.6987
Btf3	218490	873.198	836.75	831.971	894.796	704.261	839.165	770.206	678.346
Btf3l4	70533	33.9234	23.8742	28.7727	30.6445	29.8928	33.9815	28.1346	31.0771
Btg1	12226	120.274	139.695	151.91	144.299	153.26	136.808	154.985	141.503
Btg2	12227	71.3714	93.1892	110.458	72.3257	110.912	108.233	102.293	132.842
Btg3	12228	0.440564	1.77503	1.09727	1.05671	0.948978	0.772306	0.81314	1.91048
Btk	12229	80.7701	65.8537	72.5414	81.1316	69.0382	90.5804	78.8746	79.6032
Btla	208154	0.734274	0.266255	5.12057	5.87059	0.711734	0.551647	0.81314	0
Btnl2	547431	2.05597	3.01755	2.56029	2.58306	0.474489	0.330988	0.487884	1.91048
Btrc	12234	21.0002	31.5956	24.3837	34.8713	34.7563	15.3358	13.986	19.3595
Bub1	12235	170.351	185.935	148.375	179.64	164.411	156.778	167.832	172.198
Bub1b	12236	88.2597	95.4079	69.6154	75.9655	121.232	97.2002	60.1724	50.8187
Bub3	12237	375.507	362.461	374.046	338.381	329.296	319.955	305.578	311.28
Bud13	215051	6.90217	7.10013	7.68086	6.45765	10.4388	2.64791	6.993	5.73143
Bud31	231889	166.533	158.155	158.982	185.511	136.06	128.754	138.234	113.1
Bysl	53414	72.6931	63.1024	66.6894	67.864	62.1581	72.7071	57.7329	63.3004
Bzrap1	207777	12.1889	15.0878	15.1179	16.2028	18.3865	13.1292	11.2213	15.9206
Bzw1	66882	457.599	449.349	435.127	478.218	399.045	475.078	468.369	423.107
Bzw2	66912	223.072	223.565	204.457	212.046	184.102	168.363	196.292	159.971
C030005K06Rik	78695	0.440564	1.68628	2.56029	1.996	3.32142	3.86153	3.57782	4.33041
C030006K11Rik	223665	4.25879	3.72757	2.6822	1.996	3.67729	2.75824	4.71621	0.764191
C030013D06Rik	77376	1.46855	1.59753	1.95069	3.992	1.42347	0.772306	0.162628	0.50946
C030034L19Rik	320088	0.587419	2.30754	0	3.75718	3.08418	3.19955	2.76468	3.43886
C030039L03Rik	112415	1.02798	1.06502	0.243837	2.34824	1.0676	1.54461	1.78891	0.25473
C130036L24Rik	319336	3.52451	4.61508	1.3411	6.45765	0.237245	6.84042	1.78891	7.76927
C130050O18Rik	319772	12.9232	17.4841	9.63155	12.2108	5.81249	17.6527	20.4911	24.1994
C1d	57316	209.268	223.121	197.63	246.213	228.704	235.333	255.001	224.799
C1galt1	94192	1.6154	1.15377	0.609592	1.17412	0.355867	2.31692	0.975768	0
C1galt1c1	59048	60.3573	38.9619	40.5988	50.2523	48.5165	42.9181	63.9128	74.1265
C1qa	12259	329.542	351.723	355.514	286.72	399.757	395.972	342.007	354.457
C1qb	12260	1155.75	957.452	914.266	891.978	1038.3	981.49	824.199	942.374
C1qbp	12261	1042.67	922.218	976.201	1145.94	684.451	715.597	851.52	687.517
C1qc	12262	813.134	755.72	772.353	631.441	905.325	922.133	775.736	790.682
C1rl	232371	1.02798	4.43758	3.41372	1.05671	1.0676	2.97889	3.25256	2.41994
C230052I12Rik	101831	33.0423	20.9454	14.7521	30.7619	14.4719	24.4931	23.0932	21.27
C2cd2	207781	6.31475	4.88134	8.41237	5.16612	16.1326	4.30285	9.2698	5.34933
C2cd2l	71764	4.99306	1.06502	4.87674	3.63977	3.44005	2.31692	3.90307	5.22197
C2cd3	277939	4.69935	5.23634	7.3151	10.2148	2.37245	10.2606	12.5224	4.83987
C2cd5	74741	11.3078	11.8927	10.2411	11.6238	13.8788	8.82635	17.7265	9.80711
C330006A16Rik	109299	180.338	141.204	148.984	130.914	193.473	168.142	179.541	162.645
C330007P06Rik	77644	31.2801	35.3231	43.1591	27.4744	30.2487	39.3876	33.5014	37.318
C330011M18Rik	442802	0	1.15377	3.77947	0.704471	1.30485	1.21362	2.60205	2.67467
C330018D20Rik	77422	21.8814	15.0878	18.2878	19.4904	25.1479	18.756	24.2316	25.6004
C330027C09Rik	224171	44.2033	48.9021	46.329	57.1796	31.7908	43.9111	61.3108	50.6913
C3ar1	12267	778.624	823.082	830.752	718.56	891.803	877.008	933.81	908.623
C430042M11Rik	320021	4.69935	1.42003	1.21918	2.34824	4.50765	1.65494	0.975768	1.01892
C430049B03Rik	72575	4.99306	7.36638	10.1192	8.9233	4.86351	8.38504	6.17986	5.60406
C530008M17Rik	320827	1.46855	0.355006	4.02331	3.52235	2.49107	0.110329	0.81314	0.25473
C530050E15Rik	320489	10.133	7.81014	6.33976	6.80989	8.54081	11.1433	16.1002	19.7416
C5ar1	12273	110.141	102.863	86.9278	71.9734	145.905	130.961	109.123	138.446
C5ar2	319430	7.93015	11.449	12.3138	7.51436	14.1161	9.26767	11.2213	12.6091
C730034F03Rik	319362	1.6154	1.24252	2.07261	1.40894	0.711734	1.10329	1.30102	2.03784
C78339	97863	8.22386	12.6027	9.14388	14.3242	7.59183	13.0189	8.1314	10.3166
C87436	232196	13.6575	16.774	17.6782	11.8586	13.1671	14.7841	19.678	15.2838
C8g	69379	1.17484	0	1.21918	1.87859	2.25382	0.441318	0	0
C920009B18Rik	606736	6.1679	3.55006	8.65621	8.57106	13.1671	12.7982	7.64352	13.5007
Caap1	67770	32.308	24.6729	19.5069	21.956	30.7232	28.3547	25.8579	39.3558
Cab39	12283	44.6438	72.7763	52.303	63.285	97.3889	68.5146	68.3038	98.3258
Cab39l	69008	52.4271	51.9197	48.5235	40.9767	32.2653	38.3946	42.9338	40.5021
Cabin1	104248	19.5317	22.2766	14.996	27.0047	19.5727	23.7208	29.1104	17.9585
Cables1	63955	1.02798	3.37256	2.07261	1.29153	5.93112	4.74416	2.60205	6.49562
Cables2	252966	10.133	3.72757	4.51098	1.29153	9.25254	5.95779	9.59505	0.891556
Cacfd1	381356	10.7204	2.5738	15.1179	10.6845	15.3023	8.05405	11.2213	1.91048
Cacna1d	12289	1.46855	0.976267	0.243837	0	6.52423	4.19252	3.57782	2.03784
Cacna1f	54652	2.20282	4.43758	1.58494	4.34424	4.15178	1.8756	1.46365	2.03784
Cacnb2	12296	0.440564	3.10631	3.41372	4.34424	9.96427	4.63384	2.27679	4.20305
Cactin	70312	58.3013	44.1983	69.4935	38.7459	64.1747	50.1999	49.1137	61.2626
Cacul1	78832	63.8818	62.5699	49.8646	76.4351	78.7652	93.449	61.3108	64.5741
Cacybp	12301	989.801	1040.7	964.74	970.761	772.35	710.19	822.898	733.623
Cad	69719	49.9306	40.737	36.2098	68.8033	37.4846	32.5472	29.7609	32.7328
Cadm1	54725	17.3289	14.1115	11.5822	10.9193	11.625	18.8663	16.7507	19.1048
Cage1	71213	1.02798	1.95253	0	2.58306	0.830356	1.65494	0.975768	1.40102
Calcoco1	67488	1.46855	1.86378	1.58494	4.57906	4.74489	0.441318	0.162628	4.20305
Calcrl	54598	48.7558	61.4161	37.4289	48.8433	44.3647	50.9722	38.8681	54.3849
Cald1	109624	12.3358	9.40767	14.1425	7.63177	3.91454	1.65494	2.9273	4.07568
Calhm2	72691	18.7974	11.7152	10.6069	17.3769	29.7742	13.3499	14.9618	14.2649
Calm1	12313	1715.26	1700.04	1605.91	1630.62	1809.23	1737.14	1765.65	1669.5
Calm2	12314	756.742	753.235	803.686	804.741	850.285	928.863	802.244	848.888
Calm3	12315	145.239	157.268	146.424	159.445	194.422	174.32	177.59	169.396
Calml4	75600	1.46855	1.33127	0.243837	0.821883	0.118622	2.86856	3.41519	3.82095
Calr	12317	790.519	622.326	754.675	823.879	694.059	808.163	744.348	734.642
Calr3	73316	2.34968	0	1.58494	2.46565	0.711734	3.08922	0	5.60406
Calu	12321	112.784	94.6979	91.4388	71.856	97.3889	73.4794	86.0302	75.5275
Camk1	52163	84.7352	96.6505	87.2936	95.4558	204.03	178.072	150.431	138.064
Camk1d	227541	7.63644	15.9753	17.922	30.1748	23.7245	25.1551	29.5983	33.8791
Camk2a	12322	2.20282	0.798764	0.487674	1.29153	1.30485	2.31692	1.46365	1.65575
Camk2b	12323	1.46855	1.06502	2.6822	3.28753	0	0	2.27679	1.14629
Camk2d	108058	132.463	105.437	116.188	131.032	167.02	135.264	141.161	155.258
Camk2g	12325	35.2451	29.288	29.9919	24.0694	21.9451	16.7701	34.8024	38.5916
Camk4	12326	0.440564	0.0887516	0	5.16612	1.42347	1.10329	2.11416	1.40102
Camkk1	55984	2.93709	6.92262	3.77947	5.16612	0.711734	2.86856	3.25256	3.69359
Camkk2	207565	22.7625	30.5305	28.6508	24.8913	32.2653	30.1199	22.7679	23.6899
Camkmt	73582	1.90911	3.01755	3.16988	1.87859	0	5.73713	1.78891	2.16521
Caml	12328	51.546	34.7906	31.2111	48.6085	58.4808	47.883	51.3905	46.2335
Camsap1	227634	5.43362	5.23634	2.07261	5.40094	4.86351	3.53054	13.1729	9.93448
Camsap2	67886	1.32169	10.2952	9.50964	4.81388	18.3865	18.094	8.94454	8.15137
Camta1	100072	22.3219	29.3768	21.4576	24.5391	16.6071	24.3828	25.0447	20.6331
Camta2	216874	3.67137	2.66255	3.90139	5.04871	3.91454	4.30285	3.74044	4.71251
Cand1	71902	89.1408	113.07	93.8772	78.3137	59.7856	61.0122	93.0232	66.8667
Cand2	67088	3.96508	9.67392	9.87539	4.9313	8.18494	5.6268	10.5708	6.49562
Cant1	76025	13.6575	17.9278	14.0206	16.3202	32.6211	14.1222	10.4082	10.0618
Canx	12330	2878.35	3073.91	2502.13	2654.8	2983	2921.52	2790.05	2988.49
Cap1	12331	150.086	101.266	120.333	90.1723	103.676	107.351	92.698	83.4241
Capg	12332	407.228	421.836	362.707	359.398	428.701	429.071	332.249	445.396
Capn1	12333	0.881128	0.976267	1.82878	1.05671	0.593112	2.09626	0.975768	1.91048
Capn10	23830	8.95814	5.59135	6.70551	5.75318	6.16836	8.93668	3.74044	9.55238
Capn15	50817	3.2308	2.66255	8.53429	5.28353	4.50765	4.85449	6.993	5.0946
Capn2	12334	100.449	106.502	70.4688	76.5525	94.7792	85.9466	87.3312	90.5566
Capn3	12335	1.17484	1.68628	0.73151	3.75718	1.30485	0.772306	0.650512	0
Capn7	12339	26.5807	61.5048	57.1797	29.5878	49.5841	39.6083	54.1551	34.7707
Capns1	12336	70.1965	59.2861	47.3043	39.5678	49.2283	49.8689	37.4044	37.7001
Caprin1	53872	490.495	432.131	469.752	409.885	422.889	367.838	410.961	382.732
Caprin2	232560	3.96508	2.9288	5.36441	7.63177	6.99872	2.75824	4.87884	2.41994
Capza1	12340	166.093	146.263	153.617	110.485	132.027	127.982	126.687	123.289
Capza2	12343	749.546	635.195	670.551	566.512	642.103	703.35	684.013	631.349
Capzb	12345	356.563	326.872	342.225	338.381	405.214	360.115	353.553	330.767
Car13	71934	4.69935	4.70383	8.53429	10.2148	6.28698	14.5635	7.31826	13.3733
Car2	12349	1.32169	2.5738	1.3411	0.117412	2.37245	0	0.325256	0.127365
Car9	230099	4.99306	9.67392	6.82743	6.22283	10.2015	1.32395	5.69198	5.98616
Card9	332579	54.63	40.027	33.5276	39.0981	43.5344	31.0026	43.9096	25.473
Carf	241066	1.02798	1.95253	0.975347	3.992	1.54209	2.97889	2.60205	4.07568
Carhsp1	52502	60.9447	54.4047	66.0798	65.5158	48.1607	59.1366	55.944	61.5173
Carkd	69225	61.5321	64.6999	55.229	61.0541	47.8048	51.4135	60.1724	46.6156
Carm1	59035	4.84621	2.7513	1.70686	5.28353	0.711734	1.43428	1.95154	3.18413
Cars	27267	49.3432	44.0208	73.0291	63.7546	40.9247	57.0403	59.6845	55.2764
Cars2	71941	51.2523	71.7113	41.818	59.0581	56.227	56.599	51.5531	48.3987
Casc3	192160	20.1191	15.7978	18.4097	12.0934	23.4872	10.9226	13.6608	15.1564
Casc4	319996	6.46161	17.2178	12.9234	17.3769	4.38903	9.92965	8.1314	16.4301
Casc5	76464	51.2523	55.6472	82.5388	64.1069	80.3073	79.6578	78.0615	59.0974
Casd1	213819	21.2939	15.1765	17.8001	17.6118	18.9796	13.9015	21.9548	34.0065
Cask	12361	12.0421	23.4304	24.9933	31.2315	20.7589	28.2443	21.9548	27.2561
Casp1	12362	75.3365	73.2201	89.4881	81.9535	109.014	85.1743	96.7637	107.241
Casp2	12366	51.6929	81.0302	62.788	67.277	65.8354	56.4887	72.3695	52.2197
Casp3	12367	39.0634	41.8907	55.1071	50.8393	56.5828	49.9792	34.6398	49.545
Casp4	12363	6.31475	3.90507	9.38772	5.40094	20.7589	13.7912	9.10717	18.4679
Casp6	12368	31.2801	21.3891	30.8454	35.6932	49.8214	29.8993	24.8821	33.8791
Casp7	12369	58.8887	42.6895	25.4809	34.2843	30.8418	46.4487	54.3178	39.3558
Casp8	12370	162.274	142.269	144.961	148.526	135.941	147.952	140.836	144.559
Casp8ap2	26885	97.2178	98.958	105.581	129.27	120.639	142.766	129.94	161.372
Casp9	12371	22.6156	28.8443	17.3124	19.4904	34.7563	24.0518	26.5084	39.6105
Cass4	320664	9.98612	7.54388	6.09592	7.984	7.59183	8.93668	9.92031	9.80711
Cast	12380	70.6371	65.6762	54.9852	74.9087	70.6989	71.9348	70.2553	82.4052
Cat	12359	124.386	91.5029	90.7073	76.9047	85.4081	94.0007	115.141	105.331
Catsper2	212670	2.34968	2.30754	1.09727	2.23082	5.57525	2.53758	2.76468	2.67467
Cav2	12390	21.7345	36.2994	33.5276	20.6645	22.4196	19.1973	36.7539	31.2044
Cbfa2t2	12396	113.519	102.863	89.3662	97.0996	128.705	98.0828	106.847	104.949
Cbfa2t3	12398	28.1961	34.2581	43.0372	41.0941	56.1084	28.6856	35.7782	28.4024
Cbfb	12400	108.819	118.128	137.89	136.785	144.601	131.402	151.895	128.893
Cbl	12402	18.21	18.3716	20.1165	22.5431	33.3329	29.3476	20.0032	20.1237
Cblb	208650	0.587419	3.28381	4.6329	2.9353	6.88009	4.52351	5.69198	2.29257
Cbll1	104836	24.0842	18.2828	11.7042	7.86659	9.84565	15.5564	12.0345	9.29765
Cbr1	12408	14.8323	15.1765	13.6549	12.7979	14.9464	17.9837	13.6608	10.826
Cbr2	12409	7.93015	4.08257	2.92604	3.28753	2.01658	1.65494	0.325256	1.14629
Cbr4	234309	19.9722	27.4242	31.333	33.6972	20.6403	33.9815	27.3215	31.7139
Cbwd1	226043	17.4757	26.093	17.8001	21.0167	16.2513	10.5916	12.8476	16.6848
Cbx1	12412	141.715	132.861	153.13	170.247	144.245	137.691	151.569	149.145
Cbx3	12417	51.1054	51.8309	42.1838	45.2036	33.6887	31.9955	40.0065	35.4075
Cbx4	12418	3.96508	2.7513	0.73151	5.51836	2.72831	1.43428	1.95154	8.15137
Cbx5	12419	646.161	611.143	721.635	566.864	659.421	548.999	639.453	614.027
Cbx6	494448	1.76226	1.42003	2.19453	1.17412	2.37245	0.330988	1.62628	0.382095
Cbx7	52609	0.146855	0	1.70686	1.17412	0.118622	1.21362	1.30102	1.14629
Cbx8	30951	7.93015	7.10013	7.9247	8.33624	11.9809	9.04701	8.94454	10.0618
Cby1	73739	22.6156	25.2054	28.1632	31.4664	29.537	25.5964	18.5396	33.2423
Cc2d1a	212139	1.46855	3.72757	11.5822	5.16612	6.99872	1.98593	7.15563	6.24089
Cc2d1b	319965	30.3989	25.4717	30.2358	14.5591	14.1161	16.5494	21.6295	13.1186
Cc2d2a	231214	4.25879	3.81632	3.04796	1.29153	1.0676	2.64791	0.81314	2.41994
Ccar1	67500	135.4	119.371	166.297	138.194	137.958	97.9725	138.396	145.324
Ccar2	219158	12.3358	9.40767	13.5329	8.68847	6.4056	8.93668	4.22833	5.4767
Ccbl1	70266	7.34274	0.177503	4.38906	7.27953	3.67729	0.992965	3.74044	2.67467
Ccbl2	229905	22.9093	13.579	12.4357	15.2635	13.5229	8.27471	17.0759	11.3355
Ccdc101	75565	32.1612	18.1053	20.1165	30.5271	13.2857	18.425	25.2073	19.9963
Ccdc102a	234582	8.37072	15.0878	14.3864	20.3122	13.2857	14.5635	21.9548	10.0618
Ccdc106	232821	2.20282	2.04129	1.21918	1.64377	3.08418	2.09626	2.76468	1.14629
Ccdc107	622404	35.0983	35.7669	34.5029	34.6365	38.9081	40.4909	35.1277	22.671
Ccdc109b	66815	11.4547	18.4603	20.7261	8.68847	19.2168	15.4461	20.6538	12.8639
Ccdc112	240261	4.25879	7.36638	3.65755	2.58306	5.69387	4.96482	4.22833	7.76927
Ccdc114	211535	0.881128	3.01755	3.04796	1.87859	3.79591	3.19955	0.650512	1.40102
Ccdc115	69668	174.317	175.373	206.408	205.001	193.354	170.349	155.31	210.28
Ccdc117	104479	38.7696	24.9392	50.9619	33.345	39.6199	39.0566	44.8853	48.9082
Ccdc12	72654	88.5534	102.774	104.118	130.562	104.625	111.543	111.725	120.615
Ccdc122	108811	11.3078	8.96391	5.73016	3.05271	3.67729	3.30988	6.34249	6.11352
Ccdc124	234388	89.1408	81.829	75.1017	90.4071	73.4272	73.9207	64.5633	70.5603
Ccdc125	76041	5.43362	3.28381	1.70686	1.52635	4.2704	1.76527	4.39096	6.36825
Ccdc126	57895	4.5525	7.10013	7.80278	4.34424	2.60969	1.43428	6.83038	5.34933
Ccdc127	67433	67.1126	77.9239	50.5961	53.5398	71.292	50.1999	54.8056	65.0836
Ccdc130	67736	11.0141	2.84005	6.33976	7.63177	7.71045	7.06108	8.78191	3.69359
Ccdc132	73288	74.6022	58.221	67.7866	65.7506	66.5471	95.6556	72.5321	63.0457
Ccdc134	76457	41.2662	43.3108	41.0865	46.0254	21.8265	24.7138	35.1277	17.3217
Ccdc137	67291	18.21	20.2354	18.4097	17.0247	17.3189	16.8804	19.1901	19.6142
Ccdc138	76138	7.34274	5.6801	7.19319	10.2148	12.3367	10.5916	7.31826	7.89664
Ccdc14	239839	6.1679	5.8576	10.1192	8.68847	14.4719	11.0329	9.2698	11.5902
Ccdc142	243510	5.28677	2.7513	4.26714	2.11341	3.2028	2.53758	5.04147	3.56622
Ccdc15	245902	2.93709	5.59135	8.90004	3.28753	5.21938	2.20659	8.29403	6.62298
Ccdc152	100039139	0.587419	1.68628	0.609592	0.234824	1.0676	3.53054	1.46365	2.29257
Ccdc162	75973	1.46855	0.266255	0	3.63977	2.25382	0.992965	0.162628	0
Ccdc163	68394	52.1334	42.4233	46.6947	50.6045	46.9744	38.505	33.3387	33.6244
Ccdc166	223648	3.2308	1.50878	2.80412	1.05671	12.2181	0.992965	0.81314	6.36825
Ccdc167	68597	3.67137	2.13004	3.65755	5.40094	4.98214	4.30285	2.11416	4.07568
Ccdc171	320226	2.64338	2.39629	5.974	6.34024	6.52423	5.84746	7.31826	4.33041
Ccdc173	75051	5.87419	1.33127	4.38906	3.75718	0.830356	5.51647	6.34249	4.58514
Ccdc174	232236	21.0002	11.8927	23.896	28.4137	19.9285	25.4861	25.6952	24.1994
Ccdc18	73254	23.3499	14.2003	23.6522	14.7939	17.7933	22.5072	19.5154	14.0102
Ccdc181	74895	5.43362	12.0702	10.3631	13.5024	19.4541	7.72306	5.04147	5.85879
Ccdc23	69216	21.8814	28.3118	23.5303	24.7739	25.5038	30.7819	32.5256	23.3078
Ccdc25	67179	75.1896	51.4759	66.6894	53.1876	64.1747	76.348	56.1067	66.8667
Ccdc28a	215814	4.5525	3.55006	3.90139	6.22283	3.55867	4.19252	4.22833	1.52838
Ccdc28b	66264	28.4898	30.4418	41.6961	40.9767	41.7551	40.1599	37.7297	40.3747
Ccdc32	269336	27.1681	27.158	32.918	34.1668	28.3507	26.81	23.7437	21.5247
Ccdc34	68201	55.6579	57.0673	54.8633	63.1676	48.5165	35.9674	54.4804	52.3471
Ccdc38	237465	5.43362	5.76885	5.12057	6.9273	3.67729	6.50944	4.22833	6.11352
Ccdc40	207607	1.02798	4.43758	0.243837	1.64377	0	0.441318	1.95154	0.891556
Ccdc43	52715	45.8187	31.8618	36.8194	36.3977	48.7538	51.3032	36.9166	36.9359
Ccdc47	67163	145.974	157.889	127.892	189.385	130.84	156.337	172.548	138.191
Ccdc50	67501	672.888	698.564	634.341	633.437	742.694	669.7	670.515	817.302
Ccdc51	66658	15.7135	17.2178	18.1658	30.0574	23.9617	18.425	17.5638	13.8828
Ccdc53	67282	69.9028	65.6762	73.151	68.9207	70.343	90.1391	77.2483	68.013
Ccdc55	237859	81.3575	74.9951	66.8113	62.3457	67.852	47.6623	57.8956	62.791
Ccdc57	71276	1.46855	2.30754	3.2918	1.52635	4.38903	2.53758	2.27679	3.05676
Ccdc58	381045	55.3642	71.1788	54.0099	66.3377	53.7359	65.977	60.0097	54.6396
Ccdc59	52713	43.0284	46.3283	38.5262	57.1796	49.1096	41.8148	39.356	50.4366
Ccdc6	76551	171.233	152.564	152.642	134.084	139.5	97.2002	135.794	145.706
Ccdc61	232933	14.9792	10.6502	16.8247	15.0287	13.2857	23.7208	17.4012	11.3355
Ccdc62	208908	3.2308	0.798764	3.2918	3.40494	0.355867	0.882635	6.993	0.636825
Ccdc63	330188	3.08395	2.5738	3.04796	2.9353	1.18622	2.86856	2.9273	2.03784
Ccdc64	75665	2.34968	0.710013	4.14523	4.57906	4.86351	0.441318	1.1384	0
Ccdc66	320234	17.6226	25.9155	21.4576	27.1221	26.0969	19.749	19.5154	27.7656
Ccdc69	52570	1.46855	3.81632	0.121918	2.34824	8.65943	4.74416	7.80615	12.4818
Ccdc71	72454	32.7486	17.9278	25.9686	14.4417	10.2015	23.9415	27.3215	20.7605
Ccdc71l	72123	3.2308	3.46131	3.90139	5.75318	6.64285	5.73713	8.29403	8.15137
Ccdc77	67200	23.4968	32.1281	25.359	36.7499	35.4681	22.5072	38.3802	24.9636
Ccdc78	381077	1.02798	0.355006	0.73151	2.34824	1.89796	0.110329	4.0657	2.67467
Ccdc8	434130	0.734274	2.30754	1.46302	0.234824	0.474489	0	1.95154	1.40102
Ccdc82	66396	29.5178	21.1229	24.9933	21.1341	27.2831	19.087	20.8164	18.4679
Ccdc84	382073	12.7764	12.9577	11.3384	11.0367	6.64285	8.60569	7.31826	9.67975
Ccdc85b	240514	34.5109	39.672	35.3563	41.7986	29.0625	28.2443	29.273	32.2234
Ccdc86	108673	64.0287	54.0497	68.6401	72.4431	49.4655	59.6882	59.8471	57.9511
Ccdc88a	108686	49.3432	66.2974	44.2564	65.9854	76.7486	81.9748	66.5149	74.2538
Ccdc88b	78317	22.0282	18.3716	21.8234	16.2028	34.9936	29.2373	22.1174	20.1237
Ccdc88c	68339	5.43362	7.89889	4.26714	7.04471	7.47321	2.09626	5.36672	0.636825
Ccdc9	243846	11.6015	21.7441	19.5069	22.7779	15.8954	20.1903	23.7437	28.9119
Ccdc90b	66365	56.6859	57.5998	60.1058	63.7546	50.889	57.1506	49.9268	57.569
Ccdc91	67015	15.8603	17.9278	11.5822	19.2555	25.9783	18.9767	12.8476	4.71251
Ccdc93	70829	38.1822	35.7669	44.5002	46.6125	46.0255	43.3595	31.7125	32.9876
Ccdc94	72886	19.8254	24.0517	17.3124	18.5511	13.1671	15.1151	14.3113	31.2044
Ccdc96	66717	2.49653	7.01137	4.99865	0.704471	0.948978	0.772306	5.36672	0.764191
Ccdc97	52132	6.31475	3.55006	12.1918	15.0287	5.57525	10.371	6.01724	5.73143
Cchcr1	240084	8.07701	12.9577	7.68086	11.3889	14.2347	11.9156	14.1486	8.78819
Ccl12	20293	15.8603	39.5832	9.02196	13.5024	21.352	25.4861	17.7265	32.3507
Ccl2	20296	128.498	148.925	133.866	109.545	200.709	154.902	145.552	124.436
Ccl24	56221	10.5735	10.0289	8.53429	5.87059	23.0127	38.9463	20.979	28.2751
Ccl25	20300	10.4267	3.99382	5.73016	9.27553	8.06632	4.19252	10.5708	7.00508
Ccl3	20302	318.968	284.538	207.749	253.257	200.946	173.438	176.777	187.227
Ccl4	20303	23.203	14.7328	23.0426	25.7132	33.2142	28.465	30.2488	21.1426
Ccl6	20305	424.557	336.99	404.403	361.159	427.159	442.862	304.44	377.128
Ccl7	20306	47.4341	56.5348	42.0618	42.2683	27.0459	35.7467	34.1519	49.0356
Ccl9	20308	311.773	262.793	259.442	285.076	409.247	308.812	258.253	304.275
Ccm2	216527	99.5675	70.1137	99.6073	91.229	107.472	85.5053	89.1202	94.7596
Ccna2	12428	139.218	168.539	183.609	136.08	108.658	122.355	125.386	143.413
Ccnb1	268697	394.305	397.962	326.863	345.543	282.321	276.816	289.478	241.229
Ccnb2	12442	196.051	224.186	212.382	190.442	238.075	198.814	214.181	266.83
Ccnc	51813	44.6438	56.9785	54.8633	56.7099	60.0229	45.7867	53.8299	61.7721
Ccnd1	12443	21.7345	28.1343	27.6755	17.4944	24.6734	30.5612	30.8993	24.1994
Ccnd2	12444	130.113	130.376	166.297	148.056	66.7844	65.4253	90.0959	79.6032
Ccnd3	12445	99.4206	60.3511	65.9579	50.0174	55.278	54.1717	38.8681	44.1957
Ccndbp1	17151	30.2521	16.1528	14.1425	27.7092	30.1301	19.749	25.2073	22.2889
Ccne1	12447	41.2662	58.3985	37.6728	44.3817	30.6046	35.9674	40.657	59.7342
Ccne2	12448	59.7699	70.4688	65.9579	83.9495	88.9667	51.0825	53.0167	90.0471
Ccnf	12449	29.8115	23.0754	26.822	41.7986	44.0089	22.2865	28.9478	22.1615
Ccng1	12450	74.4553	61.0611	53.4003	81.1316	79.3583	48.6553	76.1099	76.9285
Ccng2	12452	14.6855	13.579	24.3837	27.0047	29.6556	23.6105	22.4427	18.3406
Ccnh	66671	219.254	229.6	193.85	228.483	211.266	205.985	193.527	194.614
Ccni	12453	93.8402	85.4678	81.6853	75.7306	90.0343	112.757	87.6565	94.7596
Ccnj	240665	36.7137	27.868	27.9193	25.948	48.8724	41.4839	38.2176	32.8602
Ccnk	12454	11.161	9.58517	9.87539	10.3322	8.42218	10.9226	14.6365	8.024
Ccnl1	56706	170.939	201.821	212.626	203.475	259.427	181.051	174.5	239.319
Ccnl2	56036	166.827	130.11	143.62	128.214	143.296	131.733	126.525	138.318
Ccnt1	12455	34.5109	41.8907	25.8467	33.2275	22.1824	31.7749	29.4357	42.2852
Ccnt2	72949	50.518	47.0383	56.2044	62.9327	67.2588	41.8148	78.712	71.9613
Ccny	67974	59.1824	36.4769	25.359	49.4304	46.9744	43.8008	38.5428	32.2234
Ccnyl1	227210	1.90911	3.46131	1.46302	2.46565	5.69387	4.30285	5.85461	3.05676
Ccp110	101565	7.19588	12.3365	10.9727	8.10142	4.03316	6.39911	8.61929	9.80711
Ccpg1	72278	3.67137	5.76885	2.07261	7.39694	5.69387	3.97186	3.08993	3.43886
Ccr1	12768	62.8538	54.671	40.8427	25.1261	49.8214	63.9911	104.57	55.2764
Ccr2	12772	5.13991	9.58517	5.48633	3.05271	13.6416	13.4602	9.75768	9.80711
Ccr5	12774	16.8883	23.2529	21.4576	20.5471	18.0306	18.9767	32.8509	32.8602
Ccrl2	54199	7.04903	11.449	6.94935	6.9273	7.23596	7.39207	10.8961	8.91556
Ccrn4l	12457	6.31475	9.58517	9.14388	4.46165	9.37116	3.7512	12.685	8.66083
Ccs	12460	32.8955	40.1157	40.7207	57.1796	59.667	55.1647	44.2348	36.1717
Ccsap	73420	3.81822	9.05266	10.3631	8.9233	13.8788	9.26767	9.75768	11.2081
Ccser2	72972	17.7694	15.0878	2.92604	18.1988	12.3367	13.6808	16.4254	17.9585
Cct2	12461	912.115	1071.14	896.344	993.891	640.086	759.177	728.736	756.294
Cct3	12462	1227.85	1273.32	1267.34	1230.24	900.225	868.403	829.403	820.868
Cct4	12464	1521.71	1588.83	1452.66	1503.22	1059.3	1219.91	1185.88	1035.48
Cct5	12465	1529.64	1510.02	1446.2	1496.77	1193.81	1287.54	1139.86	1210.35
Cct6a	12466	1015.21	966.505	974.616	970.526	679.469	651.826	710.359	748.27
Cct7	12468	1050.16	1012.12	966.447	1015.85	752.303	655.136	704.83	687.644
Cct8	12469	2104.57	1927.51	1949.6	1980.62	1425.37	1489.67	1655.23	1508.89
Ccz1	231874	94.4276	99.4018	109.97	105.084	158.954	101.944	93.8364	113.864
Cd101	630146	0.734274	3.37256	0.975347	0.939295	4.74489	1.98593	3.90307	1.78311
Cd14	12475	17.182	19.3478	10.7288	12.3282	23.4872	10.9226	5.85461	18.5953
Cd151	12476	9.3987	7.54388	8.65621	3.87459	7.71045	6.17845	4.39096	8.15137
Cd164	53599	542.334	516.09	494.257	473.17	496.79	525.389	550.008	463.991
Cd180	17079	54.63	46.0621	59.8619	44.7339	61.3277	56.3783	68.3038	55.7859
Cd1d1	12479	12.7764	13.1352	7.68086	5.75318	9.25254	11.9156	12.8476	21.27
Cd200r1	57781	14.6855	13.6677	9.14388	19.6078	46.2627	25.4861	40.0065	27.5109
Cd27	21940	3.37766	3.01755	1.70686	2.34824	2.49107	2.75824	0.975768	3.18413
Cd276	102657	2.05597	0.976267	1.70686	2.81788	1.66071	0.110329	0.975768	1.01892
Cd28	12487	27.315	13.4902	32.0645	19.1381	51.7193	25.2654	34.4771	32.6055
Cd2ap	12488	34.6577	36.9207	52.0592	68.6859	56.7015	68.0732	70.2553	47.5072
Cd2bp2	70233	78.1267	56.091	58.277	55.0661	44.3647	59.1366	44.0722	54.6396
Cd300a	217303	173.142	173.509	169.345	151.931	264.291	256.847	187.51	266.193
Cd300e	217306	3.52451	4.26008	8.53429	11.2715	4.86351	3.86153	0.325256	2.5473
Cd300ld	217305	2.64338	12.869	5.12057	1.52635	10.3201	13.4602	8.45666	10.0618
Cd300lf	246746	5.87419	8.34265	3.41372	3.87459	4.50765	4.30285	2.27679	3.18413
Cd300lg	52685	6.46161	13.934	2.56029	4.69647	6.64285	9.59866	4.71621	6.24089
Cd302	66205	128.204	118.128	107.898	95.5732	178.764	191.753	156.773	157.805
Cd320	54219	54.9237	40.737	51.9372	44.7339	32.2653	31.5542	31.5498	42.922
Cd33	12489	2.20282	5.59135	5.85208	4.22683	5.21938	12.5776	18.2143	7.00508
Cd34	12490	31.7206	16.8628	18.1658	27.2395	32.1466	27.803	41.1449	27.5109
Cd36	12491	24.8184	20.4129	17.3124	18.3162	46.1441	46.6693	33.3387	38.3369
Cd37	12493	13.5106	12.2477	12.0699	12.4457	11.1505	8.27471	16.1002	8.66083
Cd38	12494	20.1191	27.513	16.7028	12.5631	27.639	32.1059	29.9236	50.5639
Cd3eap	70333	29.2241	19.9691	34.1372	29.2355	36.8915	16.9907	23.2558	22.5436
Cd44	12505	229.974	259.155	226.768	226.018	252.784	258.612	266.059	272.561
Cd47	16423	310.304	316.222	289.19	302.218	414.822	326.465	416.816	370.76
Cd48	12506	16.4477	21.8329	18.1658	15.8506	26.2155	39.7186	40.4944	67.8856
Cd52	23833	93.3996	76.3264	84.6114	87.1196	117.199	128.754	148.154	119.341
Cd53	12508	382.41	457.159	410.499	376.657	565.473	528.368	499.431	540.028
Cd59a	12509	2.34968	2.30754	4.6329	1.40894	1.54209	1.10329	4.22833	3.69359
Cd63	12512	254.499	231.642	258.711	248.443	358.002	385.822	330.135	340.447
Cd63-ps	626721	2.20282	1.68628	1.46302	1.87859	3.79591	2.97889	3.41519	2.80203
Cd68	12514	226.156	207.59	214.333	178.349	276.983	275.934	195.804	213.973
Cd69	12515	5.28677	6.21261	13.5329	4.22683	12.3367	11.5846	14.3113	7.76927
Cd72	12517	2.49653	1.86378	6.58359	0.117412	2.49107	2.53758	2.27679	0.636825
Cd74	16149	21.8814	41.802	60.4715	6.45765	11.5064	9.378	9.10717	7.64191
Cd79b	15985	93.6933	94.3429	72.9072	88.2937	108.539	118.604	90.7464	103.293
Cd80	12519	4.11193	5.23634	2.92604	3.52235	4.50765	3.42021	1.62628	6.36825
Cd81	12520	357.151	363.171	320.523	287.072	308.181	306.164	309.156	252.31
Cd82	12521	5.87419	0	1.3411	0.469647	4.98214	0.110329	5.2041	3.94832
Cd83	12522	76.6582	69.4925	74.6141	95.3384	105.337	102.275	77.2483	98.3258
Cd84	12523	72.2525	64.1674	66.6894	77.0222	140.923	117.942	92.0475	132.205
Cd86	12524	94.2807	120.613	94.7306	92.2857	134.28	153.689	115.303	155.258
Cd9	12527	128.057	114.312	138.255	122.813	67.7333	85.8363	115.303	90.9387
Cd93	17064	19.3848	23.2529	24.6275	14.4417	20.0472	12.1362	15.287	3.69359
Cd97	26364	43.9096	29.5543	26.5782	37.1021	54.0918	42.3665	44.2348	35.1528
Cd99l2	171486	20.5597	18.1053	14.996	16.5551	15.4209	21.9556	25.8579	18.9774
Cdadc1	71891	27.315	36.2994	15.6056	30.6445	21.352	25.1551	30.7367	24.9636
Cdan1	68968	10.5735	13.934	8.53429	14.9113	23.1314	15.9978	17.7265	15.7933
Cdc123	98828	209.855	230.044	226.159	196.782	243.887	200.689	208.977	219.577
Cdc14a	229776	12.7764	5.14759	7.43702	10.6845	7.23596	11.0329	8.78191	5.60406
Cdc14b	218294	35.392	31.6843	32.918	31.1141	18.9796	27.5824	30.8993	39.3558
Cdc16	69957	176.519	152.741	164.956	135.611	144.601	118.604	114.002	111.062
Cdc20	107995	130.848	139.429	143.864	155.101	135.467	147.731	142.137	110.426
Cdc23	52563	56.3922	49.5234	63.5195	65.5158	37.8405	47.3313	38.5428	39.4832
Cdc25a	12530	53.8957	50.8547	58.1551	64.9287	56.5828	43.2491	34.4771	51.2008
Cdc25b	12531	11.0141	2.84005	7.80278	7.16212	7.94769	7.83339	9.92031	3.56622
Cdc25c	12532	64.7629	70.38	51.8153	57.4144	58.4808	66.639	55.6188	47.3798
Cdc26	66440	56.3922	73.3088	57.7893	67.7466	52.5497	56.3783	51.0652	65.2109
Cdc27	217232	59.3293	58.576	61.325	68.3337	35.8239	66.4183	69.7674	64.9562
Cdc34	216150	110.728	112.981	109.605	106.023	91.4578	99.5171	82.2898	81.3863
Cdc37	12539	372.717	368.319	384.531	398.143	269.035	302.634	282.81	277.656
Cdc37l1	67072	8.95814	7.81014	12.5576	13.2675	5.81249	16.5494	12.685	9.67975
Cdc40	71713	22.1751	25.738	40.1112	41.4464	33.4515	39.1669	42.7712	37.8274
Cdc42	12540	990.388	955.766	959.01	886.694	1027.51	966.817	1021.63	940.336
Cdc42bpa	226751	21.1471	24.9392	27.4316	33.345	35.8239	26.4791	41.3075	25.9825
Cdc42bpb	217866	1.90911	0.798764	1.09727	1.996	0.830356	2.09626	0.81314	1.40102
Cdc42bpg	240505	0.587419	0.976267	2.43837	2.23082	0.593112	2.42725	1.62628	1.14629
Cdc42ep3	260409	1.6154	3.01755	3.41372	3.05271	5.10076	9.26767	5.69198	6.87771
Cdc42ep4	56699	10.5735	10.2952	9.87539	9.74518	2.01658	8.82635	3.57782	3.18413
Cdc42se1	57912	112.491	121.501	122.65	97.3344	130.603	97.9725	110.099	110.808
Cdc42se2	72729	144.064	130.731	126.551	119.408	134.992	127.43	122.459	105.713
Cdc45	12544	122.183	92.7454	143.254	138.898	100.592	109.778	114.165	109.279
Cdc5l	71702	57.1265	56.9785	76.199	53.4224	67.7333	60.3502	66.027	83.5515
Cdc6	23834	58.7419	64.9662	56.6921	56.7099	48.6351	46.1177	60.6603	39.4832
Cdc7	12545	59.9167	41.2695	55.9605	53.6572	37.1288	57.1506	51.5531	48.3987
Cdc73	214498	18.21	18.7266	18.2878	31.8186	20.2844	19.8593	33.5014	32.8602
Cdca2	108912	72.9868	74.9951	79.8566	49.6652	102.608	71.3831	71.719	60.4984
Cdca3	14793	112.344	110.673	101.07	93.9295	92.2882	101.282	86.8434	103.038
Cdca4	71963	130.407	111.649	110.58	102.266	103.439	89.1462	117.255	112.973
Cdca5	67849	79.0078	42.7783	78.5155	60.5845	54.8035	50.6412	75.9473	70.1782
Cdca7	66953	114.4	91.4141	85.099	104.966	116.25	74.031	118.393	88.5187
Cdca7l	217946	26.8744	26.1817	26.944	25.1261	22.8941	26.0377	21.1416	14.647
Cdca8	52276	262.429	281.609	290.288	231.184	203.675	217.68	216.133	203.657
Cdh23	22295	13.3638	4.43758	4.26714	1.29153	4.2704	9.378	5.85461	3.18413
Cdip1	66626	18.21	12.4252	18.5316	20.3122	18.1492	27.141	22.4427	11.845
Cdipt	52858	48.9026	42.6008	48.8893	48.8433	41.8737	25.1551	32.363	30.4403
Cdk1	12534	573.614	559.934	486.333	530.232	544.239	540.283	558.953	509.97
Cdk10	234854	17.4757	9.31892	16.5809	10.5671	10.0829	10.702	11.5466	7.25981
Cdk11b	12537	181.806	179.278	194.582	179.758	149.701	185.133	154.009	135.389
Cdk12	69131	30.9863	32.5718	32.3084	22.7779	45.3137	32.2162	31.8751	36.5538
Cdk13	69562	18.6505	26.093	19.5069	21.6038	23.9617	26.0377	21.7922	15.0291
Cdk14	18647	25.4059	34.1694	24.5056	24.3042	38.9081	35.5261	31.5498	27.3835
Cdk16	18555	18.3568	20.9454	17.922	12.3282	24.0803	13.5705	13.1729	12.6091
Cdk17	237459	51.6929	78.1014	53.6441	42.6205	47.0931	38.836	42.6085	40.6295
Cdk18	18557	2.05597	0.266255	3.90139	0	0.474489	0.992965	0	1.27365
Cdk19	78334	17.6226	27.7792	18.2878	18.5511	20.403	34.6434	18.7022	31.3318
Cdk2	12566	48.0215	44.9971	49.4989	51.4264	58.8367	39.0566	47.8126	48.6535
Cdk20	105278	9.83927	26.2705	13.6549	18.5511	6.04974	9.48833	13.3355	7.51454
Cdk2ap1	13445	8.51757	8.52015	5.73016	8.21883	5.69387	8.93668	6.993	6.24089
Cdk2ap2	52004	57.567	61.7711	51.5715	51.1916	68.3265	69.2869	64.5633	72.9802
Cdk4	12567	489.467	419.795	398.917	370.434	327.753	334.96	311.433	286.571
Cdk5	12568	23.0562	17.3953	13.2891	15.4984	20.5217	14.5635	17.8891	20.251
Cdk5r1	12569	1.6154	1.42003	1.82878	2.9353	1.0676	3.64087	1.78891	1.27365
Cdk5rap1	66971	27.1681	21.3004	14.7521	17.4944	16.2513	14.3428	32.363	26.4919
Cdk5rap2	214444	21.4408	25.2942	16.0932	22.3082	18.5051	13.7912	20.979	29.9308
Cdk5rap3	80280	85.3226	80.1427	80.2223	112.011	102.727	101.834	80.5009	88.3914
Cdk6	12571	421.032	513.428	451.586	410.002	497.027	360.005	491.462	465.774
Cdk7	12572	95.4556	100.999	105.338	93.6946	95.491	116.729	107.497	105.84
Cdk8	264064	18.0631	23.1642	26.944	18.5511	24.3176	32.2162	15.4497	26.3646
Cdk9	107951	73.4274	55.381	68.8839	47.4344	48.2793	53.6201	50.9026	65.3383
Cdkal1	68916	32.7486	39.1394	38.1605	37.337	30.1301	21.8452	32.363	25.2183
Cdkl3	213084	9.25185	8.78641	4.38906	8.80589	7.47321	5.07515	5.52935	6.36825
Cdkn1a	12575	23.9373	19.9691	36.4536	31.8186	33.5701	37.0707	29.9236	33.6244
Cdkn1b	12576	13.5106	12.6915	19.2631	15.968	15.1837	17.9837	16.2628	16.5575
Cdkn2aip	70925	15.2729	16.5078	31.2111	11.976	19.8099	14.8945	15.7749	17.9585
Cdkn2aipnl	52626	76.0707	65.6762	73.273	70.3297	59.3112	40.8219	51.2278	35.917
Cdkn2c	12580	18.6505	23.3417	21.9453	13.972	16.6071	21.2936	21.1416	17.5764
Cdkn2d	12581	47.8746	44.3758	42.5495	32.9927	40.0943	36.519	30.8993	36.6811
Cdkn3	72391	54.9237	50.2334	58.277	49.4304	69.3941	58.6952	65.8643	65.4657
Cdpf1	72355	37.4479	29.9093	50.84	27.357	22.301	38.2843	42.1207	29.6761
Cdr2	12585	3.96508	5.8576	8.77813	4.22683	2.96556	4.52351	4.0657	1.14629
Cdr2l	237988	4.5525	2.7513	0.121918	2.46565	0.830356	5.6268	0.81314	0
Cds1	74596	1.32169	0	2.43837	1.996	0.355867	2.64791	5.04147	1.52838
Cds2	110911	32.6017	24.0517	37.7947	26.0654	32.2653	36.6294	30.8993	29.6761
Cdt1	67177	129.379	101.621	114.481	128.918	94.4234	100.731	99.8536	109.279
Cdv3	321022	1535.81	1397.3	1537.03	1363.97	1136.64	990.868	1277.28	1124.76
Cdyl	12593	7.04903	12.159	13.6549	16.4377	5.81249	16.6597	15.4497	14.3923
Cdyl2	75796	9.98612	10.9164	9.02196	7.04471	13.6416	10.4813	10.8961	3.82095
Ceacam1	26365	2.20282	0.532509	8.16853	5.04871	9.72703	5.29581	2.43942	2.80203
Cebpa	12606	10.2798	12.6915	7.07127	11.976	11.625	10.702	9.10717	5.85879
Cebpb	12608	2.79024	2.39629	2.19453	1.996	2.72831	2.53758	4.55358	6.24089
Cebpd	12609	38.3291	31.5956	24.7494	36.8673	33.3329	34.5331	37.2418	33.1149
Cebpg	12611	65.7909	55.2922	57.7893	55.4184	73.5458	51.8548	56.2693	69.1592
Cebpz	12607	123.652	84.1365	119.236	117.06	77.2231	124.893	77.2483	95.9059
Cecr2	330409	7.48959	5.5026	8.16853	7.04471	5.338	7.28174	10.8961	3.82095
Cecr5	214932	19.3848	16.5965	9.63155	6.10541	7.47321	6.17845	15.4497	1.52838
Cela1	109901	40.0913	22.8979	24.7494	37.2195	32.977	43.8008	33.5014	40.2474
Celf1	13046	161.246	174.929	177.269	167.781	122.181	160.419	162.791	147.107
Celf2	14007	261.695	299.093	266.514	263.355	283.745	271.631	256.139	290.902
Celf3	78784	1.76226	1.42003	0.609592	1.17412	2.01658	0.992965	1.30102	3.31149
Celf4	108013	0.146855	0.621261	0.243837	0.939295	1.0676	0	1.95154	1.78311
Cenpa	12615	252.737	272.024	241.033	266.994	284.931	258.06	233.209	251.164
Cenpb	12616	15.5666	11.449	7.19319	12.9153	12.6926	17.432	22.4427	7.13245
Cenpc1	12617	31.7206	33.0156	50.7181	46.7299	39.6199	44.6834	56.2693	54.5123
Cenpe	229841	144.064	151.321	205.067	186.215	175.442	176.527	228.655	160.225
Cenpf	108000	88.4065	118.04	90.2196	108.371	115.182	105.254	101.968	98.9627
Cenph	26886	61.8258	71.8	78.0278	67.277	72.9527	64.1014	74.321	75.018
Cenpi	102920	24.5247	34.7019	28.2851	28.8833	34.1632	32.8782	23.7437	35.1528
Cenpj	219103	13.8043	17.8391	21.8234	25.0087	12.8112	21.2936	31.5498	39.8653
Cenpk	60411	75.4833	68.0725	77.9059	86.8847	69.6313	72.4864	67.4906	65.2109
Cenpl	70454	46.4061	45.7958	38.892	52.3657	33.2142	53.6201	23.5811	42.7947
Cenpm	66570	11.6015	12.7802	11.5822	13.5024	16.6071	12.9085	16.2628	10.9534
Cenpn	72155	42.7347	22.4541	23.7741	25.2435	20.1658	21.2936	26.3457	24.4541
Cenpo	52504	21.5876	38.1632	23.7741	38.9807	24.7921	36.7397	37.5671	23.4352
Cenpp	66336	25.6996	28.6668	44.7441	38.8633	32.8584	29.2373	32.2003	34.898
Cenpq	83815	45.2312	62.0374	49.1331	57.7666	57.7691	57.4816	43.7469	54.2575
Cenpt	320394	27.7555	17.2178	15.2398	17.6118	20.5217	17.3217	17.2386	24.4541
Cenpv	73139	2.05597	3.81632	1.46302	0.234824	0.711734	2.97889	2.27679	2.5473
Cenpw	66311	66.5252	71.1788	71.4442	90.2897	50.7703	65.2047	72.2068	64.9562
Cep104	230967	4.99306	7.10013	11.8261	4.57906	4.62627	12.6879	11.2213	6.36825
Cep112	76380	7.63644	6.39011	4.75482	11.976	8.18494	12.7982	8.45666	7.51454
Cep120	225523	11.4547	17.2178	13.411	12.9153	17.4375	10.2606	13.4981	9.04292
Cep128	75216	16.8883	18.5491	25.359	17.8466	26.0969	31.3336	35.1277	30.0582
Cep135	381644	26.1401	19.2591	17.0686	34.5191	26.2155	30.5612	33.8266	27.5109
Cep152	99100	15.5666	13.8452	14.2645	21.4864	11.8622	14.6738	16.9133	14.5196
Cep164	214552	14.9792	16.064	23.0426	21.369	16.014	24.0518	11.0587	17.9585
Cep170	545389	55.2174	46.6833	57.3016	75.1436	61.0905	58.8056	67.1654	50.1818
Cep19	66994	38.6228	34.5244	23.2864	38.2763	29.537	40.1599	23.4184	18.5953
Cep192	70799	30.5458	35.5894	30.6015	35.5758	38.4336	38.6153	45.048	42.6673
Cep250	16328	30.2521	43.577	48.1578	40.9767	60.0229	58.4746	61.9613	65.0836
Cep290	216274	16.5946	16.3303	25.8467	28.0614	22.7755	29.8993	28.4599	19.7416
Cep350	74081	25.8464	15.709	29.3823	47.0821	52.5497	41.2632	59.034	32.2234
Cep41	83922	4.25879	4.26008	2.92604	5.40094	2.96556	1.98593	1.1384	2.80203
Cep44	382010	7.04903	13.1352	10.7288	9.98001	20.7589	5.95779	11.0587	15.6659
Cep55	74107	23.3499	34.6131	34.1372	29.0007	28.3507	31.0026	35.4529	32.9876
Cep57	74360	69.3154	93.2779	94.9744	86.2977	82.2053	81.9748	81.1514	72.0886
Cep57l1	103268	25.4059	34.1694	23.5303	27.944	46.0255	27.2514	35.9408	38.4643
Cep63	28135	50.3712	62.3924	35.7221	42.3857	39.0267	34.8641	27.6468	39.9926
Cep68	216543	23.203	23.0754	23.0426	19.8426	39.7385	20.3006	24.3942	33.2423
Cep70	68121	8.95814	10.4727	9.99731	15.8506	12.0995	12.3569	15.1244	6.49562
Cep72	74470	12.0421	10.9164	23.2864	15.968	5.69387	10.4813	9.2698	4.71251
Cep76	225659	6.31475	9.58517	4.38906	7.63177	3.44005	0.551647	10.0829	0.891556
Cep78	208518	30.3989	40.2045	43.0372	38.7459	21.2334	38.0636	44.0722	30.4403
Cep85	70012	43.1753	48.0146	43.5249	40.5071	41.8737	34.8641	39.6812	34.7707
Cep85l	100038725	6.75532	12.869	27.9193	19.2555	13.8788	8.27471	18.2143	13.5007
Cep89	72140	10.133	33.9031	12.5576	19.2555	21.8265	8.60569	17.8891	14.3923
Cep95	320162	10.133	11.3602	14.996	7.04471	13.2857	8.71602	10.2456	10.826
Cep97	74201	5.28677	9.58517	7.3151	5.40094	7.11734	2.86856	7.48089	4.33041
Cept1	99712	141.421	191.615	155.324	210.285	236.058	204.44	211.579	184.043
Cercam	99151	5.72733	4.26008	3.2918	2.9353	2.72831	2.75824	2.60205	3.05676
Cerk	223753	14.5386	17.3953	24.6275	11.3889	15.5395	15.6668	16.4254	13.246
Cers2	76893	62.5601	38.6957	64.6168	35.2235	44.7206	36.85	45.048	43.0494
Cers4	67260	3.81822	8.52015	0.73151	3.87459	7.59183	6.28878	3.90307	1.91048
Cers5	71949	164.624	167.829	176.904	164.024	154.921	150.379	124.898	143.158
Cers6	241447	31.2801	26.093	29.9919	33.1101	32.7398	34.4228	34.965	31.5865
Cetn2	26370	60.9447	80.1427	54.0099	63.9894	65.3609	53.9511	54.9683	58.4606
Cetn3	12626	203.981	214.158	197.142	249.148	214.469	230.257	253.049	224.927
Cetn4	207175	0.587419	0.0887516	0	2.11341	1.42347	3.64087	1.62628	1.78311
Cfdp1	23837	243.045	242.203	200.434	235.176	182.797	213.818	209.953	189.647
Cfh	12628	75.9239	81.3852	121.187	99.4478	123.011	123.348	118.068	140.993
Cfl1	12631	772.749	638.213	663.602	601.031	612.328	706.108	627.907	589.318
Cfl2	12632	24.5247	27.6017	27.1878	39.8026	32.1466	28.134	32.363	32.096
Cflar	12633	50.9586	44.9083	53.766	38.2763	60.1415	52.5168	54.8056	59.2248
Cfp	18636	162.128	149.458	145.083	132.323	175.68	164.28	153.846	165.957
Cggbp1	106143	85.91	82.894	74.6141	86.8847	89.7971	104.923	70.2553	79.9853
Cgrrf1	68755	37.0074	42.7783	34.1372	41.329	34.4005	51.5238	59.6845	47.7619
Chac2	68044	8.37072	9.14141	6.94935	8.10142	4.03316	6.73009	1.46365	4.20305
Chaf1a	27221	83.854	102.508	106.557	91.3464	75.3252	68.9559	81.9645	90.1745
Chaf1b	110749	43.9096	55.736	66.3236	40.9767	25.3852	54.7234	40.9823	29.8034
Champ1	101994	15.2729	18.1053	15.7275	19.6078	23.7245	18.3147	20.979	19.869
Chchd1	66121	127.91	114.933	109.97	155.571	97.1517	121.031	113.189	122.398
Chchd10	103172	4.84621	2.9288	6.58359	4.9313	8.06632	6.28878	9.2698	5.34933
Chchd2	14004	460.243	471.892	432.81	478.101	457.526	530.022	498.13	556.713
Chchd3	66075	248.919	252.942	224.33	236.233	239.143	226.175	213.531	215.629
Chchd4	72170	228.946	220.37	203.238	225.548	195.252	169.356	181.493	150.036
Chchd5	66170	21.7345	21.7441	22.1891	19.6078	25.6224	20.1903	19.678	12.7365
Chchd6	66098	36.1263	36.9207	45.4756	41.916	35.5867	45.3454	33.5014	39.6105
Chchd7	66433	58.3013	63.6349	59.4962	60.9367	57.0573	51.4135	50.5773	54.2575
Chd1	12648	66.0846	53.2509	79.247	92.0509	67.1402	71.8244	65.7017	60.2437
Chd1l	68058	24.5247	40.2045	24.6275	31.8186	22.0637	23.2795	21.7922	26.1098
Chd2	244059	25.1122	46.8608	39.0139	34.4017	65.3609	35.9674	36.1034	56.0406
Chd3	216848	1.6154	2.48504	0	0.469647	2.37245	1.21362	2.27679	1.01892
Chd4	107932	100.008	99.1355	120.09	134.437	117.792	108.343	117.58	112.463
Chd6	71389	15.7135	18.9041	25.2371	26.0654	25.8597	41.3735	23.5811	40.7568
[truncated: 9,112 more rows]

## Sheet: S4 Differential_YS
id	gene	KI_mean	WT_mean	logFC.KI-WT	PValue.KI-WT	FDR.KI-WT
[truncated: 11,026 more rows]

[truncated: 5 more sheets: S4 CPM_PB, S4 Differential_PB, S5 Neonate_CPM, S5 Neonate_Differential, S7 Network]
